# Supplementary material
Source: publisher figshare collection journal article supplement (https://springernature.figshare.com/articles/dataset/_/22696420)
Supplement: Supplementary file 1 [file 1]

## Sheet: Extended data Fig.1a
# Channel: Height
# Width: 75.0 µm
# Height: 52.7 µm
# Value units: m
2.9885e-07	2.9373e-07	2.8949e-07	2.8615e-07	2.8337e-07	2.8075e-07	2.8331e-07	2.8142e-07	2.8298e-07	2.9406e-07	2.9328e-07	2.9178e-07	2.8844e-07	3.0175e-07	3.193e-07	3.8777e-07	3.7229e-07	3.9e-07	4.1987e-07	3.368e-07	3.081e-07	2.9228e-07	2.5818e-07	2.5267e-07	2.5673e-07	2.5077e-07	2.4659e-07	2.4431e-07	2.4503e-07	2.5111e-07	2.5027e-07	2.7167e-07	2.9206e-07	3.4226e-07	4.4817e-07	4.9129e-07	5.8367e-07	6.4936e-07	7.0574e-07	7.4441e-07	7.4507e-07	7.458e-07	7.4379e-07	7.5939e-07	7.5934e-07	7.6535e-07	7.809e-07	7.8937e-07	7.9817e-07	7.9466e-07
2.9702e-07	2.9228e-07	2.881e-07	2.8643e-07	2.8387e-07	2.8086e-07	2.8008e-07	2.7685e-07	2.7724e-07	2.8309e-07	2.8476e-07	2.8543e-07	2.8827e-07	2.8682e-07	2.978e-07	3.0448e-07	3.4237e-07	3.768e-07	3.3395e-07	3.1624e-07	3.1223e-07	2.8136e-07	2.647e-07	2.6626e-07	2.593e-07	2.5239e-07	2.5022e-07	2.4899e-07	2.4843e-07	2.4749e-07	2.4581e-07	2.447e-07	2.5907e-07	2.8949e-07	3.6465e-07	4.0226e-07	5.0778e-07	5.4645e-07	6.1208e-07	6.9343e-07	7.4491e-07	7.5003e-07	7.5533e-07	7.5349e-07	7.5182e-07	7.6736e-07	7.8586e-07	7.9243e-07	8.1555e-07	8.2174e-07
2.8275e-07	2.7802e-07	2.744e-07	2.7122e-07	2.6843e-07	2.6582e-07	2.637e-07	2.6136e-07	2.593e-07	2.6002e-07	2.6013e-07	2.613e-07	2.7128e-07	2.7378e-07	2.7022e-07	2.6687e-07	2.6804e-07	2.8526e-07	2.8047e-07	2.7662e-07	2.6626e-07	2.6855e-07	2.6325e-07	2.6498e-07	2.6097e-07	2.5517e-07	2.501e-07	2.4815e-07	2.4832e-07	2.5506e-07	2.5049e-07	2.5311e-07	2.4983e-07	2.5746e-07	2.954e-07	3.159e-07	3.6014e-07	4.6405e-07	4.8734e-07	5.6356e-07	6.1944e-07	7.0763e-07	7.551e-07	7.6931e-07	7.5555e-07	7.721e-07	7.7962e-07	7.9873e-07	8.2658e-07	8.4391e-07
2.9456e-07	2.8916e-07	2.8448e-07	2.8136e-07	2.7779e-07	2.7562e-07	2.7378e-07	2.7635e-07	2.6972e-07	2.6654e-07	2.6481e-07	2.6314e-07	2.6715e-07	2.6704e-07	2.6587e-07	2.6258e-07	2.6281e-07	2.6175e-07	2.6543e-07	2.6197e-07	2.6403e-07	2.5673e-07	2.5467e-07	2.6108e-07	2.5679e-07	2.496e-07	2.4626e-07	2.4409e-07	2.4197e-07	2.3963e-07	2.3723e-07	2.3562e-07	2.3356e-07	2.3122e-07	2.3172e-07	2.5166e-07	2.7958e-07	3.027e-07	3.7078e-07	4.1212e-07	4.8672e-07	5.5392e-07	6.4022e-07	7.1711e-07	7.5026e-07	7.6742e-07	7.8279e-07	7.9382e-07	8.4263e-07	8.5115e-07
2.9846e-07	2.9278e-07	2.8844e-07	2.8431e-07	2.8225e-07	2.7958e-07	2.7707e-07	2.7445e-07	2.7545e-07	2.7183e-07	2.7005e-07	2.6749e-07	2.657e-07	2.6381e-07	2.6214e-07	2.6136e-07	2.6119e-07	2.5857e-07	2.5646e-07	2.5428e-07	2.5183e-07	2.4999e-07	2.4888e-07	2.491e-07	2.4788e-07	2.4598e-07	2.4492e-07	2.4314e-07	2.4197e-07	2.3941e-07	2.4097e-07	2.4242e-07	2.4113e-07	2.437e-07	2.4119e-07	2.4058e-07	2.4893e-07	2.6052e-07	2.6899e-07	3.0326e-07	3.6794e-07	3.8894e-07	4.7124e-07	5.5537e-07	6.1609e-07	7.117e-07	7.5544e-07	7.8095e-07	8.4987e-07	8.5299e-07
3.0426e-07	2.9579e-07	2.92e-07	2.8771e-07	2.8487e-07	2.8242e-07	2.8197e-07	2.7779e-07	2.7568e-07	2.7345e-07	2.7267e-07	2.7055e-07	2.681e-07	2.6487e-07	2.6359e-07	2.6147e-07	2.5974e-07	2.5785e-07	2.5629e-07	2.5467e-07	2.5662e-07	2.5395e-07	2.5178e-07	2.5033e-07	2.486e-07	2.4765e-07	2.4587e-07	2.452e-07	2.4871e-07	2.4854e-07	2.5317e-07	2.5334e-07	2.4776e-07	2.4721e-07	2.4219e-07	2.3807e-07	2.3807e-07	2.462e-07	2.4286e-07	2.3773e-07	2.3567e-07	3.0181e-07	3.4577e-07	3.8527e-07	4.987e-07	5.1525e-07	6.2055e-07	7.0841e-07	7.7895e-07	8.1433e-07
3.0376e-07	2.9735e-07	2.9429e-07	2.8994e-07	2.8704e-07	2.8398e-07	2.8136e-07	2.808e-07	2.7679e-07	2.7523e-07	2.7378e-07	2.7105e-07	2.6838e-07	2.6654e-07	2.642e-07	2.6247e-07	2.6058e-07	2.5907e-07	2.5757e-07	2.5662e-07	2.5473e-07	2.5395e-07	2.5205e-07	2.5133e-07	2.496e-07	2.4799e-07	2.4659e-07	2.4526e-07	2.4342e-07	2.5133e-07	2.5133e-07	2.4749e-07	2.4403e-07	2.4191e-07	2.4041e-07	2.4024e-07	2.403e-07	2.432e-07	2.4509e-07	2.471e-07	2.4398e-07	2.3863e-07	2.5239e-07	2.8253e-07	3.4922e-07	4.1864e-07	4.4154e-07	5.9008e-07	5.9175e-07	7.1081e-07
3.0281e-07	2.9791e-07	2.9362e-07	2.9044e-07	2.8933e-07	2.866e-07	2.8286e-07	2.8086e-07	2.7824e-07	2.7674e-07	2.7506e-07	2.7272e-07	2.7066e-07	2.6871e-07	2.6899e-07	2.6526e-07	2.6375e-07	2.6247e-07	2.6236e-07	2.613e-07	2.5891e-07	2.5673e-07	2.5551e-07	2.5378e-07	2.5556e-07	2.5841e-07	2.54e-07	2.5295e-07	2.4977e-07	2.496e-07	2.51e-07	2.4793e-07	2.4604e-07	2.4453e-07	2.4308e-07	2.4074e-07	2.3863e-07	2.3751e-07	2.4431e-07	2.5601e-07	2.5668e-07	2.5306e-07	2.4398e-07	2.3896e-07	2.6036e-07	2.9334e-07	3.3451e-07	3.9753e-07	4.8867e-07	5.0505e-07
3.0654e-07	3.0197e-07	2.9841e-07	2.9473e-07	2.9117e-07	2.8866e-07	2.8966e-07	2.8749e-07	2.8504e-07	2.8548e-07	2.8281e-07	2.7824e-07	2.7612e-07	2.7339e-07	2.7384e-07	2.7116e-07	2.7027e-07	2.6492e-07	2.6492e-07	2.691e-07	2.7317e-07	2.6225e-07	2.6091e-07	2.5813e-07	2.6164e-07	2.5473e-07	2.5178e-07	2.5111e-07	2.486e-07	2.4749e-07	2.4632e-07	2.4398e-07	2.4275e-07	2.4125e-07	2.4002e-07	2.3896e-07	2.3952e-07	2.423e-07	2.4609e-07	2.5657e-07	2.5729e-07	2.5005e-07	2.5601e-07	2.525e-07	2.4409e-07	2.4242e-07	2.7066e-07	3.2532e-07	3.4532e-07	3.744e-07
3.1128e-07	3.0537e-07	3.0058e-07	2.9624e-07	2.9429e-07	2.9183e-07	2.8855e-07	2.8693e-07	2.871e-07	2.8437e-07	2.852e-07	2.8019e-07	2.7796e-07	2.7668e-07	2.7356e-07	2.7206e-07	2.7016e-07	2.6827e-07	2.6882e-07	2.6832e-07	2.7061e-07	2.6442e-07	2.6197e-07	2.6336e-07	2.6593e-07	2.6203e-07	2.5579e-07	2.5244e-07	2.5133e-07	2.4921e-07	2.5127e-07	2.4799e-07	2.4665e-07	2.4537e-07	2.4476e-07	2.4236e-07	2.4113e-07	2.3941e-07	2.3773e-07	2.4141e-07	2.4303e-07	2.384e-07	2.4955e-07	2.5345e-07	2.4398e-07	2.3813e-07	2.3712e-07	2.4336e-07	2.7328e-07	3.1133e-07
3.0911e-07	3.0437e-07	3.0075e-07	2.9785e-07	2.9456e-07	2.9083e-07	2.8855e-07	2.8754e-07	2.8715e-07	2.8409e-07	2.8153e-07	2.7952e-07	2.7573e-07	2.7389e-07	2.7172e-07	2.6999e-07	2.6816e-07	2.6648e-07	2.71e-07	2.7256e-07	2.6882e-07	2.6609e-07	2.632e-07	2.6403e-07	2.6576e-07	2.6097e-07	2.6024e-07	2.5551e-07	2.5506e-07	2.5668e-07	2.51e-07	2.5077e-07	2.4832e-07	2.5267e-07	2.5088e-07	2.4375e-07	2.4047e-07	2.3969e-07	2.4052e-07	2.3813e-07	2.3656e-07	2.3528e-07	2.3445e-07	2.3339e-07	2.345e-07	2.4492e-07	2.5144e-07	2.4743e-07	2.4002e-07	2.3918e-07
3.0972e-07	3.0504e-07	3.022e-07	2.9952e-07	2.9551e-07	2.9295e-07	2.8955e-07	2.8821e-07	2.8688e-07	2.8476e-07	2.8353e-07	2.8125e-07	2.7802e-07	2.7623e-07	2.7412e-07	2.7228e-07	2.6994e-07	2.6938e-07	2.6821e-07	2.6654e-07	2.6465e-07	2.6453e-07	2.6275e-07	2.6609e-07	2.6648e-07	2.6097e-07	2.5896e-07	2.5718e-07	2.5579e-07	2.5523e-07	2.5946e-07	2.5629e-07	2.5729e-07	2.5495e-07	2.5061e-07	2.4983e-07	2.5133e-07	2.5389e-07	2.4548e-07	2.4342e-07	2.4169e-07	2.3991e-07	2.3918e-07	2.3746e-07	2.3545e-07	2.379e-07	2.3796e-07	2.3718e-07	2.3757e-07	2.3701e-07
3.1156e-07	3.0571e-07	3.0298e-07	3.0209e-07	3.0214e-07	2.9417e-07	2.9139e-07	2.8888e-07	2.8598e-07	2.8515e-07	2.8431e-07	2.8359e-07	2.8114e-07	2.7908e-07	2.8565e-07	2.8621e-07	2.7963e-07	2.7657e-07	2.7473e-07	2.7228e-07	2.6999e-07	2.681e-07	2.657e-07	2.637e-07	2.6314e-07	2.603e-07	2.5913e-07	2.5729e-07	2.5568e-07	2.549e-07	2.5935e-07	2.5969e-07	2.6024e-07	2.5662e-07	2.5049e-07	2.4776e-07	2.491e-07	2.4431e-07	2.4269e-07	2.4147e-07	2.4002e-07	2.3846e-07	2.3896e-07	2.3852e-07	2.3796e-07	2.4726e-07	2.4453e-07	2.4269e-07	2.4052e-07	2.3807e-07
3.1373e-07	3.0782e-07	3.0314e-07	3.0197e-07	3.0353e-07	2.9629e-07	2.9334e-07	2.9133e-07	2.8883e-07	2.8688e-07	2.8426e-07	2.8142e-07	2.8069e-07	2.8158e-07	2.7863e-07	2.7935e-07	2.7841e-07	2.7573e-07	2.7406e-07	2.7289e-07	2.6944e-07	2.6832e-07	2.6777e-07	2.6537e-07	2.6431e-07	2.6247e-07	2.5963e-07	2.5852e-07	2.574e-07	2.5634e-07	2.5395e-07	2.54e-07	2.5785e-07	2.5607e-07	2.5434e-07	2.4927e-07	2.4804e-07	2.4604e-07	2.4492e-07	2.4409e-07	2.4247e-07	2.4125e-07	2.3902e-07	2.3734e-07	2.3712e-07	2.3556e-07	2.3461e-07	2.3417e-07	2.3339e-07	2.3144e-07
3.164e-07	3.12e-07	3.1072e-07	3.0766e-07	3.0537e-07	2.9791e-07	2.9562e-07	2.9261e-07	2.9011e-07	2.8777e-07	2.8537e-07	2.842e-07	2.8147e-07	2.7986e-07	2.7835e-07	2.7646e-07	2.7445e-07	2.7272e-07	2.7027e-07	2.6877e-07	2.6743e-07	2.6576e-07	2.6409e-07	2.6247e-07	2.6414e-07	2.6732e-07	2.6052e-07	2.5874e-07	2.5707e-07	2.5579e-07	2.5579e-07	2.5322e-07	2.5267e-07	2.5061e-07	2.4966e-07	2.4804e-07	2.4665e-07	2.4554e-07	2.4916e-07	2.5233e-07	2.4776e-07	2.4654e-07	2.4347e-07	2.4253e-07	2.4916e-07	2.4286e-07	2.4208e-07	2.4119e-07	2.3829e-07	2.3612e-07
3.1496e-07	3.0938e-07	3.0548e-07	3.0292e-07	3.003e-07	2.9757e-07	2.9462e-07	2.9222e-07	2.9e-07	2.8766e-07	2.852e-07	2.8348e-07	2.8158e-07	2.7958e-07	2.774e-07	2.7612e-07	2.7456e-07	2.7311e-07	2.715e-07	2.6999e-07	2.6949e-07	2.7027e-07	2.686e-07	2.6682e-07	2.6693e-07	2.6715e-07	2.6158e-07	2.6097e-07	2.5818e-07	2.574e-07	2.5618e-07	2.5473e-07	2.5334e-07	2.5233e-07	2.5061e-07	2.4966e-07	2.4843e-07	2.4732e-07	2.4988e-07	2.535e-07	2.496e-07	2.5049e-07	2.4821e-07	2.4559e-07	2.4314e-07	2.4113e-07	2.3952e-07	2.4008e-07	2.4008e-07	2.4013e-07
3.1679e-07	3.1122e-07	3.076e-07	3.0437e-07	3.0103e-07	2.9785e-07	2.9501e-07	2.9217e-07	2.9261e-07	2.8933e-07	2.8738e-07	2.8587e-07	2.8403e-07	2.8353e-07	2.8866e-07	2.8403e-07	2.7813e-07	2.774e-07	2.759e-07	2.7395e-07	2.7228e-07	2.7211e-07	2.7038e-07	2.6849e-07	2.6721e-07	2.6604e-07	2.6821e-07	2.7172e-07	2.7395e-07	2.6108e-07	2.5891e-07	2.5807e-07	2.564e-07	2.554e-07	2.5378e-07	2.5306e-07	2.5172e-07	2.501e-07	2.5033e-07	2.4899e-07	2.4637e-07	2.4548e-07	2.4347e-07	2.4214e-07	2.4091e-07	2.3969e-07	2.3785e-07	2.3974e-07	2.515e-07	2.4392e-07
3.1991e-07	3.154e-07	3.1061e-07	3.0732e-07	3.0454e-07	3.0225e-07	2.9924e-07	2.9674e-07	2.9484e-07	2.9217e-07	2.9005e-07	2.881e-07	2.8621e-07	2.8743e-07	2.9339e-07	2.9568e-07	2.8442e-07	2.827e-07	2.8097e-07	2.7852e-07	2.7635e-07	2.8264e-07	2.7072e-07	2.7094e-07	2.7022e-07	2.6899e-07	2.6788e-07	2.6671e-07	2.6448e-07	2.6119e-07	2.6024e-07	2.5891e-07	2.5751e-07	2.5885e-07	2.5774e-07	2.5412e-07	2.5295e-07	2.5122e-07	2.5283e-07	2.51e-07	2.4949e-07	2.486e-07	2.4838e-07	2.4715e-07	2.4459e-07	2.4308e-07	2.4203e-07	2.4186e-07	2.4665e-07	2.4303e-07
3.1925e-07	3.1445e-07	3.1061e-07	3.066e-07	3.0476e-07	3.0114e-07	2.9835e-07	2.9562e-07	2.9312e-07	2.9317e-07	2.8933e-07	2.8827e-07	2.8615e-07	2.8426e-07	2.8426e-07	2.8364e-07	2.8103e-07	2.7969e-07	2.7763e-07	2.7573e-07	2.7462e-07	2.7311e-07	2.7083e-07	2.7005e-07	2.691e-07	2.6799e-07	2.6648e-07	2.6487e-07	2.6643e-07	2.6437e-07	2.6264e-07	2.608e-07	2.5924e-07	2.5796e-07	2.564e-07	2.5506e-07	2.54e-07	2.5244e-07	2.5111e-07	2.5038e-07	2.4815e-07	2.4999e-07	2.4838e-07	2.4659e-07	2.4509e-07	2.4437e-07	2.432e-07	2.4191e-07	2.4063e-07	2.4035e-07
3.2688e-07	3.217e-07	3.1691e-07	3.1412e-07	3.1145e-07	3.0872e-07	3.0587e-07	3.0348e-07	3.0114e-07	2.993e-07	3.0565e-07	3.0259e-07	2.993e-07	2.9317e-07	2.8961e-07	2.8821e-07	2.8727e-07	2.8632e-07	2.822e-07	2.8086e-07	2.793e-07	2.7735e-07	2.7573e-07	2.7423e-07	2.7317e-07	2.7172e-07	2.7055e-07	2.6871e-07	2.6732e-07	2.6476e-07	2.6554e-07	2.6414e-07	2.6192e-07	2.6019e-07	2.5902e-07	2.5729e-07	2.5618e-07	2.549e-07	2.5367e-07	2.5228e-07	2.5094e-07	2.4971e-07	2.4827e-07	2.4659e-07	2.4559e-07	2.4442e-07	2.4308e-07	2.4253e-07	2.4186e-07	2.3991e-07
3.3724e-07	3.3529e-07	3.2933e-07	3.2142e-07	3.1763e-07	3.1418e-07	3.1189e-07	3.0905e-07	3.0604e-07	3.0816e-07	3.1083e-07	3.0415e-07	2.988e-07	2.9507e-07	2.9384e-07	2.9217e-07	2.9005e-07	2.8721e-07	2.8565e-07	2.861e-07	2.8654e-07	2.8231e-07	2.7785e-07	2.7618e-07	2.7523e-07	2.7378e-07	2.7178e-07	2.7072e-07	2.6916e-07	2.6793e-07	2.6593e-07	2.6465e-07	2.6281e-07	2.6158e-07	2.6008e-07	2.588e-07	2.5751e-07	2.5634e-07	2.5523e-07	2.6286e-07	2.5373e-07	2.5211e-07	2.5049e-07	2.491e-07	2.4843e-07	2.4721e-07	2.4626e-07	2.4448e-07	2.4292e-07	2.4152e-07
3.3925e-07	3.339e-07	3.2994e-07	3.2237e-07	3.1952e-07	3.1418e-07	3.1262e-07	3.1245e-07	3.0381e-07	3.008e-07	2.9991e-07	2.9813e-07	2.9573e-07	2.9417e-07	2.9133e-07	2.8972e-07	2.8905e-07	2.9373e-07	2.91e-07	2.8983e-07	2.9618e-07	2.9484e-07	2.9133e-07	2.9228e-07	2.9401e-07	2.8771e-07	2.8008e-07	2.7696e-07	2.7601e-07	2.7412e-07	2.8994e-07	2.7685e-07	2.7211e-07	2.7089e-07	2.6849e-07	2.6749e-07	2.6676e-07	2.6509e-07	2.6214e-07	2.5941e-07	2.5802e-07	2.5712e-07	2.5595e-07	2.5573e-07	2.5289e-07	2.5183e-07	2.4932e-07	2.4698e-07	2.4587e-07	2.452e-07
3.3468e-07	3.2877e-07	3.2409e-07	3.1741e-07	3.1529e-07	3.1189e-07	3.1195e-07	3.1278e-07	3.0626e-07	3.0326e-07	2.9991e-07	2.9807e-07	2.964e-07	2.9468e-07	2.9234e-07	2.9066e-07	2.8877e-07	2.8721e-07	2.8515e-07	2.9306e-07	3.0075e-07	3.0214e-07	3.0599e-07	3.0833e-07	3.0888e-07	3.0108e-07	2.9306e-07	2.8626e-07	2.7896e-07	2.7635e-07	2.7863e-07	2.7657e-07	2.7295e-07	2.72e-07	2.6955e-07	2.6788e-07	2.6682e-07	2.6543e-07	2.6348e-07	2.6153e-07	2.6086e-07	2.5969e-07	2.5757e-07	2.559e-07	2.5306e-07	2.5378e-07	2.5328e-07	2.4994e-07	2.481e-07	2.4838e-07
3.3072e-07	3.2677e-07	3.1919e-07	3.1523e-07	3.1223e-07	3.0916e-07	3.0716e-07	3.0855e-07	3.0309e-07	3.0075e-07	2.9908e-07	2.9718e-07	2.9512e-07	2.9339e-07	2.9156e-07	2.9284e-07	2.8955e-07	2.8816e-07	2.8654e-07	2.8704e-07	2.9066e-07	2.9094e-07	2.9534e-07	3.0359e-07	3.0626e-07	2.9813e-07	2.915e-07	2.8353e-07	2.7891e-07	2.7718e-07	2.7623e-07	2.7378e-07	2.7222e-07	2.7094e-07	2.6899e-07	2.6765e-07	2.6643e-07	2.6431e-07	2.6297e-07	2.6225e-07	2.6108e-07	2.5974e-07	2.5807e-07	2.5712e-07	2.5412e-07	2.5618e-07	2.5389e-07	2.5088e-07	2.5127e-07	2.4598e-07
3.2744e-07	3.2342e-07	3.1802e-07	3.1473e-07	3.1128e-07	3.0821e-07	3.0587e-07	3.0353e-07	3.0114e-07	2.9863e-07	2.9646e-07	2.9445e-07	2.9969e-07	2.925e-07	2.9005e-07	2.8821e-07	2.8632e-07	2.8431e-07	2.8325e-07	2.8337e-07	2.8821e-07	2.9295e-07	2.9117e-07	2.9256e-07	2.9429e-07	2.905e-07	2.8403e-07	2.7846e-07	2.7707e-07	2.754e-07	2.7384e-07	2.7256e-07	2.7116e-07	2.6899e-07	2.6632e-07	2.6481e-07	2.6442e-07	2.6208e-07	2.6114e-07	2.5946e-07	2.5796e-07	2.5679e-07	2.5946e-07	2.5428e-07	2.53e-07	2.5233e-07	2.515e-07	2.5022e-07	2.4905e-07	2.4793e-07
3.3423e-07	3.3022e-07	3.266e-07	3.2309e-07	3.2008e-07	3.1696e-07	3.1418e-07	3.12e-07	3.0916e-07	3.0716e-07	3.0415e-07	3.0392e-07	3.1312e-07	3.0509e-07	3.0002e-07	2.9807e-07	2.9718e-07	2.9534e-07	2.9579e-07	2.9351e-07	2.8894e-07	2.8838e-07	2.8977e-07	2.9172e-07	2.9462e-07	2.91e-07	2.842e-07	2.8364e-07	2.8242e-07	2.8119e-07	2.7763e-07	2.7651e-07	2.7378e-07	2.7306e-07	2.7072e-07	2.6888e-07	2.6827e-07	2.6582e-07	2.6392e-07	2.6342e-07	2.6203e-07	2.6013e-07	2.5919e-07	2.5774e-07	2.5729e-07	2.5618e-07	2.5451e-07	2.5256e-07	2.5189e-07	2.5055e-07
3.3908e-07	3.305e-07	3.251e-07	3.2209e-07	3.1847e-07	3.1601e-07	3.1273e-07	3.1078e-07	3.0732e-07	3.0521e-07	3.0309e-07	3.0186e-07	3.0053e-07	2.9947e-07	2.9685e-07	2.9546e-07	2.9468e-07	2.9278e-07	2.915e-07	2.8955e-07	2.8832e-07	2.871e-07	2.8537e-07	2.8715e-07	2.949e-07	2.9094e-07	2.827e-07	2.8203e-07	2.8097e-07	2.7947e-07	2.7713e-07	2.7596e-07	2.7434e-07	2.73e-07	2.7167e-07	2.6988e-07	2.7339e-07	2.8186e-07	2.7155e-07	2.6816e-07	2.6715e-07	2.6509e-07	2.6331e-07	2.6821e-07	2.632e-07	2.5907e-07	2.5768e-07	2.5595e-07	2.5501e-07	2.5272e-07
3.3769e-07	3.3295e-07	3.2883e-07	3.2905e-07	3.2677e-07	3.2198e-07	3.2476e-07	3.227e-07	3.1657e-07	3.1273e-07	3.1156e-07	3.1028e-07	3.0593e-07	3.0509e-07	3.0209e-07	3.0002e-07	2.9752e-07	2.9635e-07	2.9451e-07	2.9356e-07	2.9183e-07	2.8994e-07	2.8877e-07	2.8688e-07	2.9e-07	2.8348e-07	2.8164e-07	2.8069e-07	2.8626e-07	2.8008e-07	2.7891e-07	2.7763e-07	2.7573e-07	2.7423e-07	2.7256e-07	2.7122e-07	2.7144e-07	2.7272e-07	2.7111e-07	2.6921e-07	2.6771e-07	2.6648e-07	2.7155e-07	2.7094e-07	2.7105e-07	2.6587e-07	2.6409e-07	2.6286e-07	2.6247e-07	2.6169e-07
3.3919e-07	3.3434e-07	3.3033e-07	3.281e-07	3.2994e-07	3.2688e-07	3.2727e-07	3.2627e-07	3.2415e-07	3.212e-07	3.1284e-07	3.0782e-07	3.0905e-07	3.0961e-07	3.0086e-07	3.0259e-07	2.9663e-07	2.9612e-07	3.0092e-07	2.959e-07	2.9384e-07	2.9061e-07	2.8832e-07	2.8699e-07	2.8532e-07	2.8376e-07	2.813e-07	2.8036e-07	2.7902e-07	2.7774e-07	2.764e-07	2.7467e-07	2.7311e-07	2.715e-07	2.7072e-07	2.6894e-07	2.676e-07	2.6632e-07	2.6487e-07	2.6392e-07	2.6392e-07	2.6147e-07	2.603e-07	2.5846e-07	2.5701e-07	2.5673e-07	2.5573e-07	2.5451e-07	2.6125e-07	2.6793e-07
3.4538e-07	3.398e-07	3.3557e-07	3.3089e-07	3.2716e-07	3.2927e-07	3.3011e-07	3.3039e-07	3.2961e-07	3.3039e-07	3.2365e-07	3.1791e-07	3.2309e-07	3.188e-07	3.1072e-07	3.0721e-07	3.0599e-07	3.1039e-07	3.1457e-07	3.1429e-07	3.0989e-07	3.0209e-07	2.9841e-07	2.9713e-07	2.9735e-07	2.9345e-07	2.9183e-07	2.9061e-07	2.8888e-07	2.8649e-07	2.861e-07	2.8298e-07	2.8242e-07	2.8075e-07	2.793e-07	2.7735e-07	2.759e-07	2.749e-07	2.7334e-07	2.7239e-07	2.7022e-07	2.6977e-07	2.7389e-07	2.6548e-07	2.647e-07	2.637e-07	2.6242e-07	2.6069e-07	2.5952e-07	2.6504e-07
3.3919e-07	3.3356e-07	3.3056e-07	3.276e-07	3.2381e-07	3.2097e-07	3.2755e-07	3.3412e-07	3.32e-07	3.2972e-07	3.2777e-07	3.227e-07	3.178e-07	3.1111e-07	3.0755e-07	3.0677e-07	3.0532e-07	3.0944e-07	3.1395e-07	3.1172e-07	3.1167e-07	3.0537e-07	2.9869e-07	2.9334e-07	2.9217e-07	2.9066e-07	2.8905e-07	2.876e-07	2.8543e-07	2.8309e-07	2.8236e-07	2.8125e-07	2.7952e-07	2.7802e-07	2.7685e-07	2.7495e-07	2.7272e-07	2.715e-07	2.7061e-07	2.6949e-07	2.6777e-07	2.6699e-07	2.6582e-07	2.6403e-07	2.6325e-07	2.6225e-07	2.6175e-07	2.5852e-07	2.5807e-07	2.5696e-07
3.461e-07	3.373e-07	3.3368e-07	3.2989e-07	3.2638e-07	3.237e-07	3.2342e-07	3.276e-07	3.2159e-07	3.1746e-07	3.1702e-07	3.1462e-07	3.0849e-07	3.066e-07	3.0515e-07	3.0387e-07	3.0192e-07	2.993e-07	3.0002e-07	2.978e-07	2.9512e-07	2.9183e-07	2.8977e-07	2.886e-07	2.8688e-07	2.8593e-07	2.8448e-07	2.8253e-07	2.813e-07	2.7958e-07	2.7857e-07	2.8348e-07	2.8036e-07	2.7813e-07	2.7651e-07	2.7557e-07	2.7295e-07	2.744e-07	2.7339e-07	2.6877e-07	2.671e-07	2.6693e-07	2.652e-07	2.6236e-07	2.6136e-07	2.6041e-07	2.588e-07	2.5841e-07	2.559e-07	2.5445e-07
3.2504e-07	3.1891e-07	3.1501e-07	3.1094e-07	3.0866e-07	3.0621e-07	3.0353e-07	3.0025e-07	2.9785e-07	2.9512e-07	2.9323e-07	2.9156e-07	2.8961e-07	2.9585e-07	2.9568e-07	2.8509e-07	2.8275e-07	2.8091e-07	2.7896e-07	2.7629e-07	2.7451e-07	2.7278e-07	2.7139e-07	2.6988e-07	2.6855e-07	2.6704e-07	2.6548e-07	2.6453e-07	2.6303e-07	2.6153e-07	2.6019e-07	2.6414e-07	2.676e-07	2.5991e-07	2.5802e-07	2.5634e-07	2.5484e-07	2.5322e-07	2.5211e-07	2.5233e-07	2.5829e-07	2.5724e-07	2.5278e-07	2.5072e-07	2.4955e-07	2.4821e-07	2.4715e-07	2.4353e-07	2.4548e-07	2.4175e-07
3.227e-07	3.1702e-07	3.1546e-07	3.139e-07	3.0833e-07	3.0833e-07	3.0236e-07	2.9997e-07	2.9735e-07	2.9523e-07	2.9295e-07	2.9094e-07	2.9011e-07	2.8654e-07	2.8498e-07	2.8314e-07	2.8114e-07	2.7947e-07	2.7757e-07	2.7607e-07	2.7479e-07	2.7874e-07	2.7284e-07	2.7055e-07	2.6888e-07	2.6738e-07	2.6626e-07	2.6465e-07	2.632e-07	2.6203e-07	2.6047e-07	2.6136e-07	2.6476e-07	2.6019e-07	2.6125e-07	2.5913e-07	2.5317e-07	2.5261e-07	2.5356e-07	2.6052e-07	2.7011e-07	2.691e-07	2.5969e-07	2.535e-07	2.5144e-07	2.501e-07	2.491e-07	2.4726e-07	2.4593e-07	2.4331e-07
3.2972e-07	3.2459e-07	3.2153e-07	3.2225e-07	3.1629e-07	3.1412e-07	3.1139e-07	3.0816e-07	3.056e-07	3.0331e-07	3.0147e-07	3.0153e-07	2.9924e-07	2.983e-07	2.9523e-07	2.9356e-07	2.9161e-07	2.8994e-07	2.8782e-07	2.8637e-07	2.852e-07	2.837e-07	2.8203e-07	2.7986e-07	2.7852e-07	2.7729e-07	2.7612e-07	2.7445e-07	2.7306e-07	2.7211e-07	2.7027e-07	2.691e-07	2.7178e-07	2.6955e-07	2.6442e-07	2.6476e-07	2.6342e-07	2.6331e-07	2.6448e-07	2.7506e-07	2.8465e-07	2.861e-07	2.8164e-07	2.7278e-07	2.6531e-07	2.6075e-07	2.5924e-07	2.5774e-07	2.5551e-07	2.5629e-07
3.4621e-07	3.4159e-07	3.3663e-07	3.2738e-07	3.2337e-07	3.2064e-07	3.1752e-07	3.1707e-07	3.1301e-07	3.1156e-07	3.0972e-07	3.0682e-07	3.0537e-07	3.032e-07	3.0147e-07	2.9947e-07	2.9824e-07	2.9663e-07	2.9468e-07	2.93e-07	2.9161e-07	2.8977e-07	2.8821e-07	2.8883e-07	2.8754e-07	2.8537e-07	2.8392e-07	2.8225e-07	2.9033e-07	2.8164e-07	2.8052e-07	2.813e-07	2.7885e-07	2.7713e-07	2.7562e-07	2.7813e-07	2.7484e-07	2.7467e-07	2.8431e-07	2.9033e-07	2.9367e-07	2.9445e-07	2.9401e-07	2.9178e-07	2.837e-07	2.7284e-07	2.6721e-07	2.6576e-07	2.6609e-07	2.6504e-07
3.4159e-07	3.3724e-07	3.354e-07	3.2955e-07	3.2732e-07	3.2426e-07	3.2097e-07	3.1891e-07	3.1629e-07	3.1412e-07	3.1223e-07	3.1306e-07	3.0877e-07	3.0788e-07	3.0493e-07	3.0314e-07	3.017e-07	2.9991e-07	2.9802e-07	2.9735e-07	2.9585e-07	2.9384e-07	2.9234e-07	2.9066e-07	2.8894e-07	2.876e-07	2.861e-07	2.8582e-07	2.8403e-07	2.8259e-07	2.8125e-07	2.8025e-07	2.7891e-07	2.7757e-07	2.7818e-07	2.7752e-07	2.7629e-07	2.7707e-07	2.8693e-07	2.9234e-07	2.949e-07	2.9607e-07	2.9975e-07	2.9768e-07	2.8476e-07	2.7752e-07	2.7428e-07	2.7239e-07	2.71e-07	2.6994e-07
3.4805e-07	3.437e-07	3.398e-07	3.3668e-07	3.3774e-07	3.305e-07	3.2838e-07	3.2599e-07	3.3017e-07	3.2576e-07	3.1808e-07	3.1562e-07	3.1312e-07	3.1122e-07	3.0933e-07	3.0827e-07	3.0704e-07	3.0521e-07	3.0431e-07	3.0509e-07	3.0376e-07	3.056e-07	3.0225e-07	2.9707e-07	2.9612e-07	2.9434e-07	2.9434e-07	2.9222e-07	2.9094e-07	2.8977e-07	2.8877e-07	2.8844e-07	2.8671e-07	2.8543e-07	2.8442e-07	2.8409e-07	2.8259e-07	2.8181e-07	2.8086e-07	2.8554e-07	2.9473e-07	2.9579e-07	2.9484e-07	2.9317e-07	2.8676e-07	2.8487e-07	2.8108e-07	2.7997e-07	2.7869e-07	2.7752e-07
3.1395e-07	3.0877e-07	3.042e-07	3.0086e-07	3.0086e-07	2.9529e-07	2.9228e-07	2.9027e-07	2.8994e-07	2.8832e-07	2.842e-07	2.8164e-07	2.7935e-07	2.7774e-07	2.7601e-07	2.7451e-07	2.7306e-07	2.715e-07	2.6955e-07	2.6849e-07	2.7718e-07	2.8197e-07	2.7657e-07	2.6548e-07	2.6036e-07	2.5885e-07	2.5751e-07	2.5573e-07	2.5389e-07	2.5311e-07	2.5166e-07	2.5044e-07	2.491e-07	2.4776e-07	2.4615e-07	2.4531e-07	2.4403e-07	2.4208e-07	2.4097e-07	2.4063e-07	2.4782e-07	2.4459e-07	2.4191e-07	2.4019e-07	2.3957e-07	2.4041e-07	2.418e-07	2.3623e-07	2.3512e-07	2.3389e-07
3.0738e-07	2.9284e-07	2.9345e-07	2.9345e-07	2.9206e-07	2.9033e-07	2.8883e-07	2.8693e-07	2.8988e-07	2.8782e-07	2.8554e-07	2.8392e-07	2.8498e-07	2.827e-07	2.8103e-07	2.7874e-07	2.7679e-07	2.7523e-07	2.735e-07	2.7256e-07	2.9345e-07	3.0599e-07	2.9936e-07	2.8649e-07	2.8197e-07	2.8097e-07	2.7913e-07	2.7646e-07	2.7317e-07	2.7278e-07	2.7072e-07	2.6977e-07	2.6793e-07	2.6671e-07	2.6559e-07	2.6392e-07	2.6297e-07	2.6192e-07	2.6047e-07	2.5618e-07	2.5467e-07	2.5373e-07	2.5295e-07	2.5183e-07	2.5027e-07	2.5144e-07	2.5356e-07	2.4637e-07	2.4537e-07	2.4481e-07
3.178e-07	3.1033e-07	3.0632e-07	3.0314e-07	3.0002e-07	2.9651e-07	2.9395e-07	2.9206e-07	2.9039e-07	2.8782e-07	2.8498e-07	2.8298e-07	2.8103e-07	2.7919e-07	2.7718e-07	2.7518e-07	2.7345e-07	2.7172e-07	2.7194e-07	2.7701e-07	2.8855e-07	3.0582e-07	2.9757e-07	2.8013e-07	2.7128e-07	2.696e-07	2.6877e-07	2.6765e-07	2.6565e-07	2.6431e-07	2.6214e-07	2.6258e-07	2.5896e-07	2.5646e-07	2.554e-07	2.54e-07	2.5306e-07	2.5172e-07	2.5022e-07	2.491e-07	2.4721e-07	2.4593e-07	2.4498e-07	2.4303e-07	2.4186e-07	2.4236e-07	2.4308e-07	2.3952e-07	2.3723e-07	2.3896e-07
3.2961e-07	3.2125e-07	3.1757e-07	3.178e-07	3.1334e-07	3.0944e-07	3.1306e-07	3.1629e-07	3.1111e-07	3.0131e-07	2.993e-07	2.9663e-07	2.9473e-07	2.9139e-07	2.9022e-07	2.8832e-07	2.8788e-07	2.8415e-07	2.8242e-07	2.8699e-07	2.9089e-07	3.0186e-07	2.959e-07	2.7852e-07	2.7278e-07	2.7144e-07	2.7027e-07	2.686e-07	2.6738e-07	2.6626e-07	2.6732e-07	2.6465e-07	2.6214e-07	2.6141e-07	2.6609e-07	2.6002e-07	2.5896e-07	2.5746e-07	2.5634e-07	2.5512e-07	2.5423e-07	2.5428e-07	2.5618e-07	2.5757e-07	2.6158e-07	2.5278e-07	2.4827e-07	2.4598e-07	2.4542e-07	2.4448e-07
3.3546e-07	3.3e-07	3.261e-07	3.2237e-07	3.2097e-07	3.227e-07	3.2532e-07	3.1685e-07	3.1228e-07	3.0989e-07	3.0821e-07	3.0665e-07	3.0387e-07	3.0197e-07	2.9824e-07	2.9757e-07	2.9473e-07	2.9323e-07	2.9117e-07	2.9585e-07	2.9468e-07	2.9791e-07	2.9022e-07	2.8342e-07	2.8242e-07	2.8058e-07	2.7908e-07	2.7791e-07	2.764e-07	2.749e-07	2.7378e-07	2.7228e-07	2.7027e-07	2.6933e-07	2.6804e-07	2.6715e-07	2.6726e-07	2.647e-07	2.6331e-07	2.6275e-07	2.6264e-07	2.6855e-07	2.7763e-07	2.8013e-07	2.7813e-07	2.6693e-07	2.6414e-07	2.6136e-07	2.6024e-07	2.5952e-07
3.2905e-07	3.237e-07	3.1969e-07	3.1624e-07	3.1395e-07	3.1613e-07	3.0849e-07	3.0532e-07	3.0376e-07	3.0236e-07	3.1301e-07	3.2432e-07	3.1178e-07	3.0025e-07	2.9507e-07	2.9083e-07	2.8894e-07	2.8688e-07	2.8515e-07	2.8342e-07	2.8147e-07	2.8253e-07	2.7807e-07	2.7596e-07	2.7467e-07	2.73e-07	2.7774e-07	2.7217e-07	2.7016e-07	2.686e-07	2.6715e-07	2.6777e-07	2.6487e-07	2.6353e-07	2.6219e-07	2.608e-07	2.5952e-07	2.5846e-07	2.5763e-07	2.5618e-07	2.5495e-07	2.5885e-07	2.6336e-07	2.6426e-07	2.6024e-07	2.53e-07	2.5144e-07	2.4971e-07	2.4765e-07	2.4659e-07
3.3897e-07	3.3395e-07	3.3134e-07	3.2794e-07	3.2526e-07	3.2136e-07	3.2142e-07	3.1735e-07	3.1613e-07	3.1423e-07	3.2638e-07	3.5691e-07	3.2303e-07	3.1345e-07	3.1039e-07	3.0821e-07	3.0649e-07	3.0359e-07	3.0197e-07	3.0058e-07	2.9869e-07	2.9757e-07	2.9629e-07	2.9473e-07	2.9323e-07	2.9222e-07	2.8899e-07	2.8559e-07	2.837e-07	2.8353e-07	2.8125e-07	2.8013e-07	2.7841e-07	2.7629e-07	2.7495e-07	2.7378e-07	2.7239e-07	2.71e-07	2.6927e-07	2.6799e-07	2.6738e-07	2.6453e-07	2.6286e-07	2.6292e-07	2.6169e-07	2.6075e-07	2.5985e-07	2.5818e-07	2.5685e-07	2.5545e-07
3.3719e-07	3.3161e-07	3.2799e-07	3.2476e-07	3.2192e-07	3.183e-07	3.1635e-07	3.1401e-07	3.1234e-07	3.1145e-07	3.1718e-07	3.0755e-07	3.1161e-07	3.071e-07	3.071e-07	3.0415e-07	3.0376e-07	2.9913e-07	2.9568e-07	2.9512e-07	2.9356e-07	2.9156e-07	2.9e-07	2.8827e-07	2.8676e-07	2.8983e-07	2.8621e-07	2.8286e-07	2.7863e-07	2.7841e-07	2.769e-07	2.754e-07	2.7356e-07	2.7256e-07	2.7072e-07	2.7178e-07	2.6788e-07	2.6609e-07	2.642e-07	2.6403e-07	2.6097e-07	2.598e-07	2.5946e-07	2.5857e-07	2.5746e-07	2.5623e-07	2.5451e-07	2.5339e-07	2.5172e-07	2.5044e-07
3.3953e-07	3.3407e-07	3.2966e-07	3.2604e-07	3.2276e-07	3.2142e-07	3.2487e-07	3.2437e-07	3.1757e-07	3.1423e-07	3.1072e-07	3.0983e-07	3.071e-07	3.0476e-07	3.0337e-07	3.027e-07	2.9975e-07	2.9975e-07	3.022e-07	2.9674e-07	2.9339e-07	2.9351e-07	2.9005e-07	2.8855e-07	2.876e-07	2.8615e-07	2.837e-07	2.8392e-07	2.8442e-07	2.8392e-07	2.8158e-07	2.8125e-07	2.7997e-07	2.7863e-07	2.7846e-07	2.861e-07	2.9429e-07	2.9869e-07	2.9869e-07	2.8938e-07	2.8197e-07	2.7646e-07	2.7473e-07	2.7339e-07	2.7328e-07	2.7428e-07	2.7289e-07	2.6621e-07	2.6504e-07	2.6554e-07
3.4504e-07	3.393e-07	3.3451e-07	3.3111e-07	3.2783e-07	3.2498e-07	3.2866e-07	3.3117e-07	3.2292e-07	3.183e-07	3.1741e-07	3.1507e-07	3.1128e-07	3.1033e-07	3.0766e-07	3.0448e-07	3.0387e-07	3.0203e-07	3.0064e-07	2.9685e-07	2.9568e-07	2.944e-07	2.9267e-07	2.9161e-07	2.8966e-07	2.8849e-07	2.8699e-07	2.8548e-07	2.8816e-07	2.905e-07	2.8621e-07	2.8777e-07	2.8587e-07	2.9339e-07	2.8621e-07	2.9813e-07	3.0498e-07	3.1122e-07	2.8637e-07	2.8699e-07	2.7679e-07	2.8348e-07	2.8142e-07	2.7913e-07	2.7841e-07	2.7568e-07	2.7245e-07	2.7111e-07	2.7061e-07	2.6927e-07
3.2515e-07	3.2003e-07	3.198e-07	3.1445e-07	3.1039e-07	3.0755e-07	3.0833e-07	3.0916e-07	3.0537e-07	3.0253e-07	2.9679e-07	2.9378e-07	2.9195e-07	2.8977e-07	2.8777e-07	2.8593e-07	2.8331e-07	2.8225e-07	2.8286e-07	2.7818e-07	2.7629e-07	2.7456e-07	2.7317e-07	2.7573e-07	2.7228e-07	2.6687e-07	2.6565e-07	2.6409e-07	2.676e-07	2.6147e-07	2.608e-07	2.5941e-07	2.5841e-07	2.6247e-07	2.5785e-07	2.6442e-07	2.7412e-07	2.8203e-07	2.8314e-07	2.7529e-07	2.5958e-07	2.5529e-07	2.5194e-07	2.5133e-07	2.5016e-07	2.4866e-07	2.476e-07	2.4587e-07	2.4297e-07	2.4225e-07
4.6594e-07	4.6082e-07	4.5525e-07	4.5123e-07	4.48e-07	4.455e-07	4.4377e-07	4.421e-07	4.3887e-07	4.3892e-07	4.3396e-07	4.3045e-07	4.28e-07	4.2577e-07	4.2405e-07	4.2249e-07	4.2037e-07	4.1853e-07	4.1714e-07	4.1909e-07	4.1457e-07	4.1363e-07	4.1268e-07	4.1268e-07	4.104e-07	4.0806e-07	4.0616e-07	4.0583e-07	4.0449e-07	4.0432e-07	4.0104e-07	4.0059e-07	3.992e-07	3.9764e-07	3.9641e-07	4.026e-07	4.0282e-07	4.0009e-07	3.9652e-07	3.9212e-07	3.8906e-07	3.8761e-07	3.8672e-07	3.8538e-07	3.841e-07	3.8348e-07	3.8237e-07	3.8187e-07	3.7981e-07	3.7919e-07
3.2855e-07	3.2437e-07	3.1958e-07	3.1635e-07	3.1356e-07	3.0989e-07	3.1301e-07	3.1451e-07	3.0693e-07	3.0314e-07	3.0064e-07	2.9852e-07	2.9618e-07	2.9401e-07	2.9473e-07	2.8977e-07	2.8788e-07	2.8598e-07	2.842e-07	2.8309e-07	2.8426e-07	2.9089e-07	2.9663e-07	2.8782e-07	2.8091e-07	2.7846e-07	2.7707e-07	2.7601e-07	2.7373e-07	2.7155e-07	2.7083e-07	2.6855e-07	2.6821e-07	2.671e-07	2.6476e-07	2.6565e-07	2.6431e-07	2.6832e-07	2.6543e-07	2.6013e-07	2.5974e-07	2.5824e-07	2.5618e-07	2.5306e-07	2.5289e-07	2.5116e-07	2.52e-07	2.5295e-07	2.4821e-07	2.471e-07
3.2911e-07	3.2315e-07	3.1858e-07	3.1473e-07	3.1189e-07	3.1094e-07	3.0794e-07	3.1156e-07	3.0721e-07	3.0242e-07	2.9997e-07	2.9791e-07	3.0326e-07	3.1367e-07	3.1206e-07	3.0236e-07	3.0548e-07	3.0181e-07	2.93e-07	2.9167e-07	2.9367e-07	3.0248e-07	3.0392e-07	2.9479e-07	2.8604e-07	2.8353e-07	2.8247e-07	2.8097e-07	2.7896e-07	2.7707e-07	2.7417e-07	2.744e-07	2.7557e-07	2.6855e-07	2.6621e-07	2.6565e-07	2.6593e-07	2.6888e-07	2.6804e-07	2.6303e-07	2.618e-07	2.6097e-07	2.5985e-07	2.6554e-07	2.6114e-07	2.6726e-07	2.7323e-07	2.7289e-07	2.6275e-07	2.5618e-07
3.3607e-07	3.3044e-07	3.2654e-07	3.2237e-07	3.1925e-07	3.164e-07	3.1451e-07	3.1239e-07	3.0905e-07	3.0727e-07	3.0448e-07	3.0242e-07	3.0064e-07	3.0732e-07	3.1317e-07	3.0838e-07	3.0281e-07	2.9768e-07	2.9295e-07	2.9161e-07	2.9033e-07	2.9484e-07	2.9651e-07	2.8933e-07	2.8626e-07	2.8537e-07	2.8309e-07	2.8097e-07	2.7924e-07	2.7913e-07	2.8359e-07	2.8476e-07	2.7724e-07	2.7456e-07	2.7618e-07	2.6871e-07	2.6966e-07	2.7272e-07	2.676e-07	2.6453e-07	2.6353e-07	2.6281e-07	2.6158e-07	2.608e-07	2.6008e-07	2.7295e-07	2.8136e-07	2.7935e-07	2.6877e-07	2.5902e-07
3.3412e-07	3.2855e-07	3.2381e-07	3.2036e-07	3.1763e-07	3.1473e-07	3.1178e-07	3.1217e-07	3.0732e-07	3.0565e-07	3.0342e-07	3.0158e-07	3.0275e-07	3.0114e-07	3.0298e-07	3.0281e-07	3.0158e-07	2.9607e-07	2.925e-07	2.886e-07	2.8754e-07	2.8554e-07	2.8409e-07	2.8403e-07	2.8309e-07	2.8091e-07	2.7746e-07	2.7607e-07	2.7685e-07	2.8437e-07	2.8732e-07	2.8259e-07	2.7428e-07	2.7406e-07	2.715e-07	2.6899e-07	2.7072e-07	2.7194e-07	2.6632e-07	2.6403e-07	2.6297e-07	2.6141e-07	2.6013e-07	2.5946e-07	2.6476e-07	2.73e-07	2.7607e-07	2.7367e-07	2.6286e-07	2.5751e-07
3.3301e-07	3.2688e-07	3.2315e-07	3.1952e-07	3.1657e-07	3.1356e-07	3.1067e-07	3.0799e-07	3.0554e-07	3.0348e-07	3.0142e-07	2.993e-07	2.9757e-07	2.9568e-07	2.9378e-07	2.925e-07	2.9061e-07	2.8966e-07	2.9451e-07	3.0599e-07	3.0376e-07	3.0025e-07	2.9707e-07	2.9211e-07	2.9323e-07	2.9601e-07	2.9479e-07	2.8871e-07	2.8398e-07	2.847e-07	2.8153e-07	2.8325e-07	2.8598e-07	2.8387e-07	2.8309e-07	2.827e-07	2.8214e-07	2.7579e-07	2.7272e-07	2.72e-07	2.7473e-07	2.6687e-07	2.6621e-07	2.6515e-07	2.6448e-07	2.6509e-07	2.7022e-07	2.6832e-07	2.6203e-07	2.6091e-07
3.2955e-07	3.2582e-07	3.1819e-07	3.1172e-07	3.0844e-07	3.0565e-07	3.0298e-07	3.0086e-07	3.0398e-07	2.9713e-07	2.915e-07	2.8966e-07	2.8749e-07	2.8526e-07	2.8331e-07	2.8186e-07	2.8036e-07	2.7835e-07	2.8821e-07	2.9763e-07	2.9133e-07	2.7885e-07	2.8058e-07	2.8058e-07	2.7406e-07	2.7534e-07	2.7401e-07	2.686e-07	2.6715e-07	2.6554e-07	2.6387e-07	2.6219e-07	2.6097e-07	2.5952e-07	2.5935e-07	2.6297e-07	2.6147e-07	2.5595e-07	2.5428e-07	2.5217e-07	2.5066e-07	2.4893e-07	2.476e-07	2.462e-07	2.4476e-07	2.4336e-07	2.4303e-07	2.4303e-07	2.3991e-07	2.3885e-07
3.4343e-07	3.3735e-07	3.3212e-07	3.2604e-07	3.2142e-07	3.1841e-07	3.1824e-07	3.1133e-07	3.0972e-07	3.1211e-07	3.0677e-07	3.0108e-07	2.9891e-07	2.9874e-07	2.978e-07	2.954e-07	2.9501e-07	2.9094e-07	2.9986e-07	3.0292e-07	3.0092e-07	2.9033e-07	2.8704e-07	2.8749e-07	2.8593e-07	2.8136e-07	2.7885e-07	2.7791e-07	2.7584e-07	2.7378e-07	2.7267e-07	2.7155e-07	2.7094e-07	2.6793e-07	2.6671e-07	2.6509e-07	2.6297e-07	2.6203e-07	2.6091e-07	2.6058e-07	2.6648e-07	2.6247e-07	2.5634e-07	2.5506e-07	2.5395e-07	2.525e-07	2.5105e-07	2.5601e-07	2.7623e-07	2.5495e-07
3.6354e-07	3.578e-07	3.5145e-07	3.4337e-07	3.3524e-07	3.3206e-07	3.2487e-07	3.2231e-07	3.2047e-07	3.1774e-07	3.2147e-07	3.2615e-07	3.1863e-07	3.1094e-07	3.095e-07	3.0794e-07	3.0654e-07	3.0565e-07	2.9941e-07	3.0248e-07	2.988e-07	2.9334e-07	2.9256e-07	2.9066e-07	2.8816e-07	2.8704e-07	2.8493e-07	2.8364e-07	2.8253e-07	2.8387e-07	2.7986e-07	2.7869e-07	2.7701e-07	2.7584e-07	2.7378e-07	2.7323e-07	2.7846e-07	2.7367e-07	2.7111e-07	2.6949e-07	2.7089e-07	2.666e-07	2.6459e-07	2.6359e-07	2.6225e-07	2.6097e-07	2.6075e-07	2.5885e-07	2.6058e-07	2.5813e-07
3.7e-07	3.6365e-07	3.5123e-07	3.398e-07	3.368e-07	3.3418e-07	3.3228e-07	3.2933e-07	3.2376e-07	3.2231e-07	3.1969e-07	3.2136e-07	3.1546e-07	3.1167e-07	3.1016e-07	3.0671e-07	3.0537e-07	3.0142e-07	3.0047e-07	2.9646e-07	2.9523e-07	2.9729e-07	2.915e-07	2.8972e-07	2.8844e-07	2.871e-07	2.8699e-07	2.8777e-07	2.8203e-07	2.7935e-07	2.793e-07	2.7763e-07	2.7724e-07	2.7573e-07	2.7406e-07	2.7272e-07	2.7139e-07	2.6966e-07	2.6821e-07	2.6704e-07	2.6587e-07	2.6637e-07	2.6286e-07	2.6136e-07	2.5991e-07	2.5835e-07	2.5774e-07	2.5701e-07	2.5584e-07	2.5445e-07
3.9101e-07	3.841e-07	3.6972e-07	3.6242e-07	3.583e-07	3.5535e-07	3.5267e-07	3.5006e-07	3.4967e-07	3.4437e-07	3.4187e-07	3.3997e-07	3.3785e-07	3.3596e-07	3.3384e-07	3.3557e-07	3.3797e-07	3.3507e-07	3.3022e-07	3.2855e-07	3.2482e-07	3.2309e-07	3.2192e-07	3.2008e-07	3.1852e-07	3.1847e-07	3.2376e-07	3.2744e-07	3.1936e-07	3.2248e-07	3.1328e-07	3.1211e-07	3.1016e-07	3.0849e-07	3.0716e-07	3.0576e-07	3.0521e-07	3.017e-07	3.0002e-07	2.9874e-07	2.9952e-07	2.9607e-07	2.9484e-07	2.9339e-07	2.9222e-07	2.9111e-07	2.9039e-07	2.9039e-07	2.8888e-07	2.8816e-07
4.0115e-07	3.9591e-07	3.9385e-07	3.866e-07	3.8432e-07	3.8092e-07	3.7841e-07	3.7607e-07	3.7396e-07	3.7635e-07	3.7541e-07	3.6788e-07	3.6605e-07	3.6332e-07	3.6103e-07	3.6014e-07	3.607e-07	3.5646e-07	3.5379e-07	3.5178e-07	3.5067e-07	3.495e-07	3.476e-07	3.4632e-07	3.4554e-07	3.4415e-07	3.4476e-07	3.4521e-07	3.4181e-07	3.3836e-07	3.3735e-07	3.3696e-07	3.3607e-07	3.344e-07	3.3284e-07	3.3178e-07	3.3056e-07	3.2944e-07	3.2732e-07	3.2627e-07	3.2582e-07	3.2476e-07	3.2376e-07	3.2264e-07	3.212e-07	3.1986e-07	3.1874e-07	3.1718e-07	3.1629e-07	3.1562e-07
3.3702e-07	3.2749e-07	3.2437e-07	3.2153e-07	3.2058e-07	3.1468e-07	3.1529e-07	3.0849e-07	3.0665e-07	3.0454e-07	3.0292e-07	2.9997e-07	2.9913e-07	2.9885e-07	3.0186e-07	2.9785e-07	2.9362e-07	2.9189e-07	2.9011e-07	2.9044e-07	2.8615e-07	2.8548e-07	2.8504e-07	2.8927e-07	2.847e-07	2.8103e-07	2.7612e-07	2.7674e-07	2.7462e-07	2.7289e-07	2.7183e-07	2.7011e-07	2.7356e-07	2.744e-07	2.749e-07	2.7011e-07	2.6804e-07	2.671e-07	2.6604e-07	2.6576e-07	2.6799e-07	2.6509e-07	2.6487e-07	2.5746e-07	2.5634e-07	2.5534e-07	2.5462e-07	2.5373e-07	2.5217e-07	2.5139e-07
4.7803e-07	4.9363e-07	4.6305e-07	4.2455e-07	3.9925e-07	2.9807e-07	2.881e-07	2.9757e-07	2.9702e-07	2.964e-07	2.9429e-07	2.9278e-07	2.9189e-07	2.8977e-07	2.8844e-07	2.881e-07	2.8565e-07	2.847e-07	2.9022e-07	2.8543e-07	2.8342e-07	2.822e-07	2.8019e-07	2.7869e-07	2.7757e-07	2.7618e-07	2.7545e-07	2.7445e-07	2.7506e-07	2.7161e-07	2.7033e-07	2.6849e-07	2.6999e-07	2.7752e-07	2.7947e-07	2.7406e-07	2.7033e-07	2.6933e-07	2.6799e-07	2.6682e-07	2.6632e-07	2.6465e-07	2.6275e-07	2.6136e-07	2.5991e-07	2.5852e-07	2.5774e-07	2.569e-07	2.5534e-07	2.5824e-07
3.6109e-07	3.5585e-07	3.5173e-07	3.4844e-07	3.5033e-07	3.4688e-07	3.4025e-07	3.4097e-07	3.3546e-07	3.3334e-07	3.3128e-07	3.3496e-07	3.2844e-07	3.3362e-07	3.3178e-07	3.2309e-07	3.212e-07	3.1891e-07	3.1702e-07	3.1819e-07	3.2147e-07	3.1345e-07	3.1122e-07	3.1106e-07	3.1412e-07	3.1022e-07	3.086e-07	3.0699e-07	3.0465e-07	3.042e-07	3.0275e-07	3.0142e-07	3.0092e-07	2.9819e-07	2.9824e-07	2.9607e-07	2.9479e-07	2.9378e-07	2.9345e-07	2.925e-07	2.905e-07	2.905e-07	2.9456e-07	2.9094e-07	2.8749e-07	2.8571e-07	2.8988e-07	2.8832e-07	2.8988e-07	2.9183e-07
3.4939e-07	3.4421e-07	3.398e-07	3.3641e-07	3.3284e-07	3.3056e-07	3.276e-07	3.2593e-07	3.2515e-07	3.2292e-07	3.1941e-07	3.1685e-07	3.1585e-07	3.1379e-07	3.1189e-07	3.1128e-07	3.0983e-07	3.081e-07	3.0604e-07	3.0398e-07	3.0576e-07	3.0309e-07	3.0058e-07	2.9919e-07	2.9841e-07	2.964e-07	2.9512e-07	2.9351e-07	2.9206e-07	2.9105e-07	2.8955e-07	2.9094e-07	2.8732e-07	2.8637e-07	2.8487e-07	2.8426e-07	2.8275e-07	2.8415e-07	2.8988e-07	2.8387e-07	2.827e-07	2.813e-07	2.8465e-07	2.8019e-07	2.7601e-07	2.8064e-07	2.7863e-07	2.7334e-07	2.744e-07	2.8158e-07
3.2593e-07	3.2181e-07	3.1702e-07	3.1195e-07	3.0911e-07	3.0638e-07	3.0376e-07	3.0153e-07	2.9863e-07	2.9523e-07	2.9406e-07	2.9195e-07	2.9039e-07	2.891e-07	2.8849e-07	2.8548e-07	2.8392e-07	2.8359e-07	2.808e-07	2.798e-07	2.7774e-07	2.7596e-07	2.7445e-07	2.7311e-07	2.715e-07	2.7033e-07	2.6888e-07	2.6743e-07	2.6699e-07	2.6582e-07	2.6426e-07	2.6264e-07	2.6197e-07	2.6013e-07	2.5885e-07	2.5841e-07	2.5724e-07	2.5579e-07	2.5356e-07	2.5423e-07	2.5774e-07	2.5495e-07	2.5384e-07	2.53e-07	2.5033e-07	2.4966e-07	2.4827e-07	2.4637e-07	2.4581e-07	2.447e-07
5.1564e-07	5.1113e-07	5.0985e-07	5.0416e-07	4.9848e-07	4.9374e-07	4.9046e-07	4.7118e-07	4.0711e-07	2.886e-07	2.7974e-07	2.7841e-07	2.9824e-07	2.8532e-07	2.6754e-07	2.5272e-07	2.5139e-07	2.5077e-07	2.4949e-07	2.5072e-07	2.7183e-07	2.9401e-07	2.8069e-07	2.5267e-07	2.3846e-07	2.5406e-07	2.5473e-07	2.6453e-07	2.6047e-07	2.5913e-07	2.5746e-07	2.5618e-07	2.5506e-07	2.5523e-07	2.5579e-07	2.6375e-07	2.5718e-07	2.3278e-07	2.5228e-07	2.6091e-07	2.5685e-07	2.4058e-07	2.1757e-07	2.2085e-07	2.2353e-07	2.2492e-07	2.5066e-07	2.4336e-07	2.53e-07	2.2871e-07
5.0823e-07	5.011e-07	4.865e-07	4.7965e-07	4.7229e-07	4.6806e-07	4.6522e-07	4.616e-07	4.6009e-07	4.5775e-07	4.548e-07	4.5185e-07	4.553e-07	4.5346e-07	4.5123e-07	4.47e-07	4.4577e-07	4.4349e-07	4.4243e-07	4.4226e-07	4.4572e-07	4.4522e-07	4.3981e-07	4.3446e-07	4.3318e-07	4.3201e-07	4.3374e-07	4.2834e-07	4.3001e-07	4.2744e-07	4.2388e-07	4.2237e-07	4.2115e-07	4.2009e-07	4.182e-07	4.1686e-07	4.163e-07	4.2204e-07	4.2288e-07	4.2081e-07	4.1714e-07	4.1235e-07	4.1012e-07	4.0917e-07	4.0767e-07	4.0683e-07	4.0845e-07	4.1034e-07	4.0884e-07	4.0326e-07
3.6866e-07	3.6922e-07	3.5357e-07	3.5546e-07	3.4526e-07	3.3362e-07	3.4304e-07	3.4187e-07	3.1044e-07	3.2354e-07	3.1679e-07	3.1262e-07	3.105e-07	3.0805e-07	3.1239e-07	3.0599e-07	3.0509e-07	3.0387e-07	3.032e-07	3.0197e-07	3.1044e-07	3.1869e-07	3.1379e-07	3.0353e-07	3.017e-07	2.9657e-07	2.9451e-07	2.9317e-07	2.9534e-07	2.9228e-07	2.8665e-07	2.842e-07	2.8275e-07	2.8097e-07	2.7952e-07	2.7813e-07	2.7774e-07	2.9206e-07	3.0164e-07	2.8002e-07	2.8264e-07	2.8197e-07	2.7579e-07	2.7623e-07	2.7874e-07	2.7128e-07	2.6871e-07	2.6977e-07	2.7651e-07	2.7133e-07
4.5396e-07	4.4901e-07	4.4304e-07	4.3552e-07	4.2594e-07	4.1134e-07	4.041e-07	4.0705e-07	4.051e-07	3.9719e-07	3.9073e-07	3.8627e-07	3.8159e-07	3.8053e-07	3.7886e-07	3.7585e-07	3.7407e-07	3.7273e-07	3.6933e-07	3.6783e-07	3.6761e-07	3.6822e-07	3.612e-07	3.5947e-07	3.5808e-07	3.5646e-07	3.5479e-07	3.5373e-07	3.5223e-07	3.5078e-07	3.5045e-07	3.524e-07	3.4833e-07	3.4682e-07	3.4638e-07	3.4532e-07	3.4432e-07	3.5384e-07	3.5897e-07	3.568e-07	3.4983e-07	3.4292e-07	3.4025e-07	3.3975e-07	3.3824e-07	3.3713e-07	3.3574e-07	3.3457e-07	3.4159e-07	3.5312e-07
3.739e-07	3.7201e-07	3.6794e-07	3.6064e-07	3.534e-07	3.4627e-07	3.4153e-07	3.3668e-07	3.3602e-07	3.3563e-07	3.3596e-07	3.3368e-07	3.2465e-07	3.1874e-07	3.2047e-07	3.2443e-07	3.1234e-07	3.1028e-07	3.0749e-07	3.0487e-07	3.0303e-07	3.042e-07	3.0498e-07	2.9919e-07	2.9651e-07	2.9529e-07	2.9367e-07	2.9334e-07	2.9016e-07	2.8866e-07	2.8727e-07	2.8598e-07	2.8286e-07	2.8231e-07	2.8119e-07	2.7986e-07	2.7763e-07	2.7612e-07	2.7518e-07	2.7417e-07	2.725e-07	2.7066e-07	2.7038e-07	2.6905e-07	2.7222e-07	2.6877e-07	2.6682e-07	2.6615e-07	2.6498e-07	2.7401e-07
3.5056e-07	3.4515e-07	3.4136e-07	3.3802e-07	3.368e-07	3.354e-07	3.2894e-07	3.2688e-07	3.2498e-07	3.2231e-07	3.2097e-07	3.2861e-07	3.266e-07	3.217e-07	3.2504e-07	3.2253e-07	3.1295e-07	3.0922e-07	3.1189e-07	3.0894e-07	3.0504e-07	3.0755e-07	3.0353e-07	3.0298e-07	2.9674e-07	2.9534e-07	2.9434e-07	2.9206e-07	2.8944e-07	2.8827e-07	2.8721e-07	2.8916e-07	2.8977e-07	2.8225e-07	2.808e-07	2.798e-07	2.8019e-07	2.7523e-07	2.7395e-07	2.7284e-07	2.72e-07	2.7083e-07	2.6983e-07	2.6821e-07	2.6676e-07	2.7094e-07	2.6643e-07	2.6526e-07	2.6414e-07	2.6331e-07
7.1131e-07	4.7987e-07	4.3859e-07	4.4912e-07	3.4682e-07	3.037e-07	3.0844e-07	3.1406e-07	3.1579e-07	3.1406e-07	3.1239e-07	3.1702e-07	3.1362e-07	3.0738e-07	3.0626e-07	3.0582e-07	3.0175e-07	3.0064e-07	2.9908e-07	2.9685e-07	2.9802e-07	2.9657e-07	2.9362e-07	2.9573e-07	2.9078e-07	2.8944e-07	2.8838e-07	2.8704e-07	2.8571e-07	2.8426e-07	2.8342e-07	2.8403e-07	2.881e-07	2.9234e-07	2.9373e-07	2.9128e-07	2.8838e-07	2.8091e-07	2.7997e-07	2.7947e-07	2.7557e-07	2.7529e-07	2.7395e-07	2.7378e-07	2.7562e-07	2.744e-07	2.6704e-07	2.6665e-07	2.6504e-07	2.6409e-07
3.3551e-07	3.3022e-07	3.2576e-07	3.2342e-07	3.1891e-07	3.164e-07	3.1395e-07	3.1167e-07	3.0855e-07	3.0704e-07	3.0521e-07	3.0376e-07	3.0175e-07	2.9958e-07	2.978e-07	2.959e-07	2.9573e-07	2.9289e-07	2.9651e-07	2.9947e-07	2.9172e-07	2.8894e-07	2.8727e-07	2.8587e-07	2.8454e-07	2.8281e-07	2.8136e-07	2.8002e-07	2.7796e-07	2.7735e-07	2.7579e-07	2.7529e-07	2.7545e-07	2.8771e-07	2.9858e-07	2.9579e-07	2.8353e-07	2.7874e-07	2.7674e-07	2.7657e-07	2.7947e-07	2.8108e-07	2.9367e-07	2.9462e-07	2.8782e-07	2.7662e-07	2.6983e-07	2.6565e-07	2.6303e-07	2.6164e-07
3.6059e-07	3.549e-07	3.5089e-07	3.5061e-07	3.4471e-07	3.4175e-07	3.3858e-07	3.3618e-07	3.3384e-07	3.3139e-07	3.2916e-07	3.2688e-07	3.2476e-07	3.2287e-07	3.2153e-07	3.1958e-07	3.1802e-07	3.1635e-07	3.1412e-07	3.1239e-07	3.1668e-07	3.173e-07	3.1039e-07	3.0977e-07	3.1512e-07	3.0821e-07	3.0587e-07	3.0431e-07	3.0298e-07	3.0147e-07	3.0331e-07	3.0092e-07	3.0041e-07	3.1156e-07	3.2225e-07	3.1367e-07	3.0287e-07	3.0131e-07	3.0916e-07	3.1362e-07	3.154e-07	3.2387e-07	3.2705e-07	3.2276e-07	3.1518e-07	3.0064e-07	2.9802e-07	2.9417e-07	2.871e-07	2.842e-07
3.3251e-07	3.2705e-07	3.2348e-07	3.2537e-07	3.1835e-07	3.1512e-07	3.1295e-07	3.086e-07	3.0665e-07	3.0654e-07	3.0236e-07	3.0041e-07	2.9802e-07	2.9735e-07	2.9479e-07	2.9278e-07	2.9061e-07	2.9195e-07	2.9885e-07	2.9061e-07	2.8972e-07	2.8732e-07	2.847e-07	2.8359e-07	2.8431e-07	2.8827e-07	2.8041e-07	2.793e-07	2.783e-07	2.7662e-07	2.7841e-07	2.7612e-07	2.7222e-07	2.774e-07	2.8331e-07	2.7774e-07	2.7228e-07	2.7038e-07	2.6894e-07	2.7456e-07	2.8169e-07	2.8805e-07	2.8916e-07	2.8515e-07	2.7584e-07	2.6526e-07	2.6219e-07	2.5857e-07	2.559e-07	2.5478e-07
3.3641e-07	3.3234e-07	3.276e-07	3.2381e-07	3.261e-07	3.2303e-07	3.203e-07	3.1518e-07	3.1412e-07	3.1579e-07	3.1223e-07	3.0805e-07	3.0649e-07	3.0448e-07	3.017e-07	3.0114e-07	2.9885e-07	3.0086e-07	3.0142e-07	2.9323e-07	2.9317e-07	2.9189e-07	2.9005e-07	2.8888e-07	2.8615e-07	2.8465e-07	2.8242e-07	2.8147e-07	2.8008e-07	2.7857e-07	2.7958e-07	2.7919e-07	2.7367e-07	2.7116e-07	2.7022e-07	2.6938e-07	2.6877e-07	2.7038e-07	2.7245e-07	2.7061e-07	2.7077e-07	2.7445e-07	2.7183e-07	2.6777e-07	2.6665e-07	2.6604e-07	2.6481e-07	2.6348e-07	2.6253e-07	2.6058e-07
3.5836e-07	3.5485e-07	3.4827e-07	3.4214e-07	3.3925e-07	3.3434e-07	3.3206e-07	3.2939e-07	3.3128e-07	3.29e-07	3.2359e-07	3.1629e-07	3.1479e-07	3.1256e-07	3.095e-07	3.0816e-07	3.0632e-07	3.0487e-07	3.0314e-07	3.0181e-07	3.0019e-07	2.9835e-07	2.9612e-07	2.9434e-07	2.9328e-07	2.9228e-07	2.9039e-07	2.9e-07	2.8682e-07	2.8559e-07	2.8465e-07	2.8314e-07	2.8208e-07	2.8075e-07	2.7919e-07	2.7768e-07	2.7612e-07	2.7501e-07	2.7278e-07	2.715e-07	2.7105e-07	2.6977e-07	2.71e-07	2.6609e-07	2.6526e-07	2.6403e-07	2.6242e-07	2.6292e-07	2.6292e-07	2.5857e-07
3.8387e-07	3.7886e-07	3.7011e-07	3.549e-07	3.4298e-07	3.3925e-07	3.3613e-07	3.3295e-07	3.3273e-07	3.3134e-07	3.2465e-07	3.2298e-07	3.2142e-07	3.1913e-07	3.1668e-07	3.1501e-07	3.1312e-07	3.1217e-07	3.1128e-07	3.076e-07	3.0699e-07	3.0649e-07	3.0231e-07	3.0119e-07	2.9952e-07	2.9835e-07	2.9651e-07	2.9495e-07	2.9317e-07	2.9206e-07	2.9061e-07	2.8938e-07	2.9122e-07	2.9066e-07	2.861e-07	2.8459e-07	2.9055e-07	2.8944e-07	2.8342e-07	2.8264e-07	2.8114e-07	2.7952e-07	2.7818e-07	2.7685e-07	2.7529e-07	2.7456e-07	2.7846e-07	2.715e-07	2.6988e-07	2.6849e-07
4.0232e-07	4.0115e-07	3.8465e-07	3.783e-07	3.6972e-07	3.5774e-07	3.4916e-07	3.578e-07	3.5468e-07	3.4894e-07	3.4426e-07	3.3919e-07	3.3719e-07	3.4064e-07	3.3446e-07	3.2699e-07	3.2582e-07	3.2354e-07	3.2058e-07	3.2365e-07	3.1813e-07	3.1501e-07	3.1117e-07	3.0944e-07	3.0816e-07	3.0721e-07	3.0643e-07	3.0459e-07	3.0298e-07	3.0482e-07	3.0264e-07	3.0153e-07	2.9858e-07	2.9713e-07	2.9674e-07	2.9573e-07	2.944e-07	2.9356e-07	2.9033e-07	2.9055e-07	2.8688e-07	2.8515e-07	2.8376e-07	2.8136e-07	2.8431e-07	2.9518e-07	2.9078e-07	2.8331e-07	2.8091e-07	2.8147e-07
3.9596e-07	3.9145e-07	3.8761e-07	3.8053e-07	3.6766e-07	3.49e-07	3.4053e-07	3.3769e-07	3.3501e-07	3.3485e-07	3.407e-07	3.3785e-07	3.2933e-07	3.3072e-07	3.256e-07	3.1852e-07	3.1635e-07	3.1429e-07	3.1178e-07	3.105e-07	3.0916e-07	3.0905e-07	3.0543e-07	3.1089e-07	3.1652e-07	3.1217e-07	3.0342e-07	3.0147e-07	2.998e-07	3.0131e-07	3.017e-07	2.9507e-07	2.9144e-07	2.8933e-07	2.8821e-07	2.8688e-07	2.8532e-07	2.8398e-07	2.827e-07	2.8353e-07	2.8103e-07	2.7924e-07	2.8298e-07	2.8515e-07	2.8526e-07	2.9039e-07	2.905e-07	2.832e-07	2.7718e-07	2.7612e-07
3.5897e-07	3.5167e-07	3.5178e-07	3.5056e-07	3.4281e-07	3.3579e-07	3.2816e-07	3.2994e-07	3.3212e-07	3.2175e-07	3.2638e-07	3.1769e-07	3.0966e-07	3.1301e-07	3.1262e-07	3.1055e-07	3.0805e-07	3.1028e-07	3.0621e-07	3.0175e-07	3.0103e-07	3.0788e-07	3.0236e-07	3.0515e-07	3.1044e-07	3.0465e-07	3.0866e-07	2.8777e-07	2.9819e-07	2.9924e-07	2.9819e-07	2.9512e-07	2.8821e-07	2.8732e-07	2.7902e-07	2.7707e-07	2.7657e-07	2.7484e-07	2.7417e-07	2.7434e-07	2.7362e-07	2.6899e-07	2.6782e-07	2.6788e-07	2.7462e-07	2.8058e-07	2.749e-07	2.6665e-07	2.7128e-07	2.6899e-07
3.3334e-07	3.2755e-07	3.2354e-07	3.1897e-07	3.1551e-07	3.1713e-07	3.1295e-07	3.0911e-07	3.071e-07	3.0576e-07	3.042e-07	3.0253e-07	3.0002e-07	2.9919e-07	2.9624e-07	2.9507e-07	2.9323e-07	2.9685e-07	3.0225e-07	2.9089e-07	2.9e-07	2.9629e-07	2.9256e-07	3.0521e-07	3.1406e-07	3.1635e-07	3.0872e-07	2.9328e-07	2.8459e-07	2.8292e-07	2.8142e-07	2.7679e-07	2.7467e-07	2.774e-07	2.7178e-07	2.6894e-07	2.6827e-07	2.6927e-07	2.7061e-07	2.647e-07	2.618e-07	2.6309e-07	2.5896e-07	2.5952e-07	2.6882e-07	2.7434e-07	2.759e-07	2.6621e-07	2.6219e-07	2.5796e-07
3.2799e-07	3.2359e-07	3.1785e-07	3.1484e-07	3.1161e-07	3.1245e-07	3.115e-07	3.0933e-07	3.0153e-07	2.9796e-07	2.9768e-07	2.9339e-07	2.9161e-07	2.9033e-07	2.8961e-07	2.8916e-07	2.861e-07	2.9078e-07	2.9462e-07	2.8532e-07	2.8292e-07	2.8103e-07	2.7958e-07	2.827e-07	2.9245e-07	2.9791e-07	2.9334e-07	2.8136e-07	2.7657e-07	2.7451e-07	2.7401e-07	2.7974e-07	2.759e-07	2.6944e-07	2.7116e-07	2.6487e-07	2.6387e-07	2.6375e-07	2.6955e-07	2.6141e-07	2.5534e-07	2.5696e-07	2.53e-07	2.5673e-07	2.6426e-07	2.6297e-07	2.5623e-07	2.5072e-07	2.5066e-07	2.4877e-07
3.2276e-07	3.1958e-07	3.1546e-07	3.0994e-07	3.0638e-07	3.037e-07	3.0225e-07	3.061e-07	2.9824e-07	2.9568e-07	2.9289e-07	2.905e-07	2.886e-07	2.8615e-07	2.8537e-07	2.8504e-07	2.8253e-07	3.0036e-07	3.0509e-07	2.8977e-07	2.8303e-07	2.8114e-07	2.7941e-07	2.7791e-07	2.754e-07	2.7389e-07	2.7033e-07	2.6821e-07	2.7094e-07	2.759e-07	2.842e-07	2.9066e-07	2.891e-07	2.7852e-07	2.6704e-07	2.6364e-07	2.6186e-07	2.608e-07	2.598e-07	2.5662e-07	2.554e-07	2.5451e-07	2.5657e-07	2.5774e-07	2.5835e-07	2.549e-07	2.4821e-07	2.4676e-07	2.4749e-07	2.437e-07
3.2515e-07	3.198e-07	3.193e-07	3.1691e-07	3.1646e-07	3.0938e-07	3.0515e-07	3.0131e-07	2.9891e-07	2.9702e-07	2.949e-07	2.9312e-07	2.9144e-07	2.8938e-07	2.8771e-07	2.8955e-07	2.8922e-07	2.8883e-07	3.0236e-07	2.9462e-07	2.8554e-07	2.8225e-07	2.8108e-07	2.7974e-07	2.7768e-07	2.7584e-07	2.7523e-07	2.7311e-07	2.73e-07	2.7217e-07	2.8805e-07	2.9317e-07	2.9172e-07	2.8225e-07	2.6866e-07	2.6548e-07	2.6403e-07	2.6242e-07	2.6091e-07	2.5896e-07	2.5595e-07	2.559e-07	2.5456e-07	2.5584e-07	2.5233e-07	2.4838e-07	2.4765e-07	2.4659e-07	2.4492e-07	2.4214e-07
3.4337e-07	3.3724e-07	3.3267e-07	3.3518e-07	3.3368e-07	3.2727e-07	3.2732e-07	3.1874e-07	3.1546e-07	3.1668e-07	3.1206e-07	3.1278e-07	3.1195e-07	3.0766e-07	3.0649e-07	3.0465e-07	3.0337e-07	3.0075e-07	2.9919e-07	2.9908e-07	2.9707e-07	2.9573e-07	2.9312e-07	2.9128e-07	2.9022e-07	2.8844e-07	2.8788e-07	2.8654e-07	2.8364e-07	2.8309e-07	2.8816e-07	2.9468e-07	2.9618e-07	2.8871e-07	2.8459e-07	2.8359e-07	2.8186e-07	2.8052e-07	2.827e-07	2.7406e-07	2.7395e-07	2.7584e-07	2.7869e-07	2.7206e-07	2.6609e-07	2.6515e-07	2.6409e-07	2.6342e-07	2.6431e-07	2.5935e-07
3.3345e-07	3.2749e-07	3.2331e-07	3.1941e-07	3.159e-07	3.1373e-07	3.105e-07	3.0838e-07	3.0526e-07	3.027e-07	3.0147e-07	2.9997e-07	2.9774e-07	2.959e-07	2.9534e-07	2.9429e-07	2.9328e-07	2.954e-07	3.0604e-07	3.1178e-07	3.0799e-07	3.0142e-07	2.9401e-07	2.8715e-07	2.8387e-07	2.8303e-07	2.8231e-07	2.8192e-07	2.7852e-07	2.7707e-07	2.7635e-07	2.7289e-07	2.6983e-07	2.7217e-07	2.6637e-07	2.6509e-07	2.6832e-07	2.6894e-07	2.6777e-07	2.6219e-07	2.613e-07	2.6058e-07	2.5919e-07	2.5729e-07	2.5646e-07	2.5484e-07	2.5434e-07	2.5685e-07	2.618e-07	2.627e-07
3.4415e-07	3.4047e-07	3.3379e-07	3.3039e-07	3.2693e-07	3.2443e-07	3.2159e-07	3.1925e-07	3.1624e-07	3.1434e-07	3.1178e-07	3.0989e-07	3.0844e-07	3.0671e-07	3.0487e-07	3.0275e-07	3.037e-07	3.193e-07	3.3758e-07	3.4287e-07	3.3746e-07	3.2827e-07	3.2136e-07	3.1e-07	2.9278e-07	2.905e-07	2.8894e-07	2.8587e-07	2.8409e-07	2.8325e-07	2.8169e-07	2.8025e-07	2.7852e-07	2.764e-07	2.7545e-07	2.7568e-07	2.8888e-07	2.9039e-07	2.852e-07	2.7501e-07	2.7406e-07	2.7222e-07	2.7105e-07	2.7189e-07	2.686e-07	2.6671e-07	2.6621e-07	2.6498e-07	2.6448e-07	2.7389e-07
3.5128e-07	3.4538e-07	3.4125e-07	3.3797e-07	3.3529e-07	3.3206e-07	3.2939e-07	3.2816e-07	3.2387e-07	3.2209e-07	3.2042e-07	3.1869e-07	3.1685e-07	3.1507e-07	3.1334e-07	3.1345e-07	3.188e-07	3.2638e-07	3.4003e-07	3.4448e-07	3.3808e-07	3.2415e-07	3.0966e-07	3.0359e-07	3.0264e-07	3.0142e-07	3.0348e-07	3.0938e-07	3.056e-07	2.9757e-07	2.9518e-07	2.9456e-07	2.9261e-07	2.9072e-07	2.8949e-07	2.9044e-07	3.022e-07	3.0961e-07	3.0554e-07	2.8961e-07	2.8381e-07	2.8253e-07	2.8153e-07	2.8058e-07	2.7874e-07	2.7724e-07	2.7389e-07	2.7796e-07	2.72e-07	2.6983e-07
3.4504e-07	3.4064e-07	3.3568e-07	3.3173e-07	3.2922e-07	3.261e-07	3.2276e-07	3.1986e-07	3.1718e-07	3.1507e-07	3.1334e-07	3.1111e-07	3.0916e-07	3.0743e-07	3.0599e-07	3.0866e-07	3.1607e-07	3.1585e-07	3.1668e-07	3.1757e-07	3.1145e-07	3.0197e-07	3.0064e-07	2.9378e-07	2.9066e-07	2.8855e-07	2.9111e-07	3.1679e-07	3.2404e-07	3.0275e-07	2.9044e-07	2.8754e-07	2.8476e-07	2.822e-07	2.8008e-07	2.7841e-07	2.7802e-07	2.8582e-07	2.8554e-07	2.7584e-07	2.7222e-07	2.7011e-07	2.6933e-07	2.6821e-07	2.6648e-07	2.6899e-07	2.6804e-07	2.6119e-07	2.6158e-07	2.5835e-07
3.4192e-07	3.3668e-07	3.3334e-07	3.3117e-07	3.2727e-07	3.2393e-07	3.2142e-07	3.1874e-07	3.1579e-07	3.1379e-07	3.1172e-07	3.095e-07	3.0833e-07	3.0777e-07	3.1028e-07	3.0866e-07	3.0654e-07	3.0309e-07	3.0181e-07	3.003e-07	2.9852e-07	2.9674e-07	3.0326e-07	3.0799e-07	3.0576e-07	3.0448e-07	3.0142e-07	3.344e-07	3.3613e-07	3.154e-07	2.9362e-07	2.8849e-07	2.8649e-07	2.8481e-07	2.8298e-07	2.8158e-07	2.8069e-07	2.7869e-07	2.7395e-07	2.7116e-07	2.7016e-07	2.6921e-07	2.6827e-07	2.6721e-07	2.6615e-07	2.6453e-07	2.6715e-07	2.6336e-07	2.6147e-07	2.6013e-07
3.4833e-07	3.4237e-07	3.3785e-07	3.3423e-07	3.3189e-07	3.2944e-07	3.2888e-07	3.2387e-07	3.2253e-07	3.2053e-07	3.178e-07	3.1607e-07	3.1445e-07	3.1484e-07	3.2198e-07	3.1585e-07	3.154e-07	3.1089e-07	3.0911e-07	3.0816e-07	3.0576e-07	3.0938e-07	3.2186e-07	3.2576e-07	3.1596e-07	3.0275e-07	3.0838e-07	3.3624e-07	3.4103e-07	3.2092e-07	3.0181e-07	2.9089e-07	2.8571e-07	2.8454e-07	2.8314e-07	2.8259e-07	2.8041e-07	2.7707e-07	2.7596e-07	2.749e-07	2.7412e-07	2.7835e-07	2.7913e-07	2.7222e-07	2.7077e-07	2.6944e-07	2.6988e-07	2.6933e-07	2.647e-07	2.6331e-07
3.5072e-07	3.4616e-07	3.4214e-07	3.4181e-07	3.4198e-07	3.3529e-07	3.3189e-07	3.2744e-07	3.256e-07	3.2381e-07	3.2042e-07	3.1925e-07	3.1835e-07	3.2331e-07	3.2571e-07	3.1919e-07	3.134e-07	3.1713e-07	3.1507e-07	3.0643e-07	3.0571e-07	3.0626e-07	3.242e-07	3.2649e-07	3.1223e-07	3.0142e-07	3.0716e-07	3.2432e-07	3.276e-07	3.1317e-07	2.9646e-07	2.9211e-07	2.9005e-07	2.891e-07	2.8715e-07	2.8587e-07	2.8604e-07	2.8331e-07	2.7724e-07	2.7612e-07	2.7735e-07	2.8153e-07	2.7707e-07	2.725e-07	2.7144e-07	2.7005e-07	2.6855e-07	2.676e-07	2.6593e-07	2.6398e-07
3.2627e-07	3.2075e-07	3.1724e-07	3.1908e-07	3.1657e-07	3.1535e-07	3.1289e-07	3.1434e-07	3.1234e-07	3.0782e-07	3.0103e-07	2.9986e-07	3.0203e-07	2.9757e-07	2.9367e-07	2.9267e-07	2.8727e-07	2.8766e-07	2.9501e-07	2.8381e-07	2.8381e-07	2.8192e-07	2.9078e-07	2.9456e-07	2.837e-07	2.7818e-07	2.8231e-07	2.9384e-07	2.9328e-07	2.8197e-07	2.7194e-07	2.6916e-07	2.6888e-07	2.6643e-07	2.6364e-07	2.6192e-07	2.6147e-07	2.6292e-07	2.5712e-07	2.5935e-07	2.5311e-07	2.4994e-07	2.486e-07	2.4687e-07	2.4554e-07	2.457e-07	2.4832e-07	2.4598e-07	2.4141e-07	2.4743e-07
3.5507e-07	3.4872e-07	3.4504e-07	3.4259e-07	3.4187e-07	3.3986e-07	3.3886e-07	3.4733e-07	3.5006e-07	3.4677e-07	3.4064e-07	3.295e-07	3.2448e-07	3.1908e-07	3.1718e-07	3.1423e-07	3.1312e-07	3.11e-07	3.0738e-07	3.0532e-07	3.0264e-07	3.0136e-07	3.0136e-07	3.0459e-07	2.9997e-07	2.9768e-07	2.9807e-07	3.0632e-07	3.0359e-07	2.9663e-07	2.9317e-07	2.9156e-07	2.9022e-07	2.8738e-07	2.8587e-07	2.8331e-07	2.8504e-07	2.9412e-07	2.9456e-07	2.8437e-07	2.8214e-07	2.8058e-07	2.7735e-07	2.7562e-07	2.7484e-07	2.7334e-07	2.72e-07	2.7072e-07	2.7038e-07	2.6687e-07
3.3863e-07	3.3356e-07	3.2978e-07	3.3033e-07	3.2649e-07	3.1958e-07	3.1891e-07	3.2387e-07	3.3563e-07	3.3858e-07	3.2961e-07	3.1284e-07	3.0732e-07	3.0543e-07	3.0298e-07	3.0131e-07	3.0381e-07	3.095e-07	3.1028e-07	3.1128e-07	2.9863e-07	2.9412e-07	2.9161e-07	2.8977e-07	2.8688e-07	2.8548e-07	2.8337e-07	2.8749e-07	2.8103e-07	2.7796e-07	2.8002e-07	2.7763e-07	2.7545e-07	2.7334e-07	2.7551e-07	2.8844e-07	2.8916e-07	2.7612e-07	2.8314e-07	2.8025e-07	2.7105e-07	2.6721e-07	2.6604e-07	2.6799e-07	2.6381e-07	2.5852e-07	2.5746e-07	2.5618e-07	2.549e-07	2.5361e-07
3.4248e-07	3.4081e-07	3.4694e-07	3.4838e-07	3.4465e-07	3.3808e-07	3.2766e-07	3.2058e-07	3.1479e-07	3.1445e-07	3.12e-07	3.1278e-07	3.047e-07	3.0114e-07	2.9891e-07	2.9908e-07	3.0309e-07	3.0961e-07	3.1211e-07	3.0944e-07	2.9835e-07	2.9133e-07	2.8961e-07	2.8793e-07	2.8693e-07	2.8543e-07	2.837e-07	2.803e-07	2.7802e-07	2.7456e-07	2.7328e-07	2.7094e-07	2.7245e-07	2.7105e-07	2.7317e-07	2.8164e-07	2.8242e-07	2.7144e-07	2.6782e-07	2.6537e-07	2.6381e-07	2.6008e-07	2.6002e-07	2.5846e-07	2.574e-07	2.5584e-07	2.5412e-07	2.5239e-07	2.5155e-07	2.4994e-07
3.6209e-07	3.6281e-07	3.6683e-07	3.6454e-07	3.5752e-07	3.5e-07	3.3953e-07	3.3083e-07	3.2532e-07	3.2276e-07	3.2036e-07	3.1785e-07	3.1629e-07	3.1613e-07	3.1278e-07	3.1083e-07	3.11e-07	3.1468e-07	3.1913e-07	3.1501e-07	3.0665e-07	3.0175e-07	3.0526e-07	2.993e-07	2.9507e-07	2.9339e-07	2.9183e-07	2.9055e-07	2.891e-07	2.8799e-07	2.8637e-07	2.8604e-07	2.822e-07	2.813e-07	2.8559e-07	2.7902e-07	2.783e-07	2.7846e-07	2.8086e-07	2.7451e-07	2.7022e-07	2.6882e-07	2.6799e-07	2.6671e-07	2.6531e-07	2.6286e-07	2.6119e-07	2.5991e-07	2.5896e-07	2.5891e-07
3.6688e-07	3.6928e-07	3.7407e-07	3.7145e-07	3.6527e-07	3.5379e-07	3.4148e-07	3.3563e-07	3.2844e-07	3.2654e-07	3.2432e-07	3.2003e-07	3.1707e-07	3.1262e-07	3.1089e-07	3.1055e-07	3.0626e-07	3.047e-07	3.0487e-07	3.0158e-07	2.9919e-07	2.9768e-07	3.0521e-07	2.9863e-07	2.9406e-07	2.9066e-07	2.8955e-07	2.8838e-07	2.8727e-07	2.8498e-07	2.8381e-07	2.8247e-07	2.8303e-07	2.822e-07	2.798e-07	2.7835e-07	2.7629e-07	2.7473e-07	2.7328e-07	2.7222e-07	2.7061e-07	2.6938e-07	2.6832e-07	2.6743e-07	2.7434e-07	2.8392e-07	2.7863e-07	2.7144e-07	2.696e-07	2.671e-07
3.568e-07	3.5574e-07	3.6248e-07	3.6716e-07	3.612e-07	3.4432e-07	3.3301e-07	3.281e-07	3.2342e-07	3.217e-07	3.2482e-07	3.2203e-07	3.1312e-07	3.1111e-07	3.0961e-07	3.0738e-07	3.0509e-07	3.0303e-07	3.0175e-07	2.9969e-07	2.9819e-07	2.964e-07	2.9607e-07	2.9551e-07	2.9267e-07	3.0114e-07	2.9674e-07	2.886e-07	2.8793e-07	2.8621e-07	2.847e-07	2.8337e-07	2.832e-07	2.7997e-07	2.7919e-07	2.7735e-07	2.7657e-07	2.7451e-07	2.7345e-07	2.7206e-07	2.7061e-07	2.6921e-07	2.705e-07	2.7885e-07	2.9401e-07	2.9729e-07	2.8771e-07	2.72e-07	2.6972e-07	2.6821e-07
3.6254e-07	3.5992e-07	3.6616e-07	3.651e-07	3.5702e-07	3.4894e-07	3.4075e-07	3.3707e-07	3.3629e-07	3.3022e-07	3.3083e-07	3.2744e-07	3.2225e-07	3.2047e-07	3.188e-07	3.1635e-07	3.1384e-07	3.1172e-07	3.1028e-07	3.0877e-07	3.0771e-07	3.0571e-07	3.0381e-07	3.0231e-07	3.008e-07	3.0888e-07	3.0387e-07	2.9696e-07	2.9557e-07	2.9401e-07	2.9245e-07	2.9094e-07	2.8949e-07	2.8816e-07	2.8682e-07	2.8598e-07	2.8526e-07	2.8381e-07	2.8298e-07	2.8309e-07	2.8214e-07	2.8292e-07	2.822e-07	2.983e-07	3.12e-07	3.1234e-07	3.0008e-07	2.8286e-07	2.7763e-07	2.7618e-07
3.5295e-07	3.4482e-07	3.4092e-07	3.3707e-07	3.344e-07	3.3139e-07	3.2916e-07	3.2682e-07	3.2432e-07	3.222e-07	3.1991e-07	3.1746e-07	3.1518e-07	3.1312e-07	3.1133e-07	3.095e-07	3.0782e-07	3.0649e-07	3.0498e-07	3.0554e-07	3.0231e-07	3.0415e-07	3.0108e-07	3.0571e-07	3.0638e-07	2.9885e-07	2.9791e-07	2.9596e-07	2.9451e-07	2.9295e-07	2.9072e-07	2.8933e-07	2.8832e-07	2.8749e-07	2.8626e-07	2.8849e-07	2.8309e-07	2.8376e-07	2.8097e-07	2.8626e-07	2.8147e-07	2.7969e-07	2.798e-07	2.9395e-07	3.0593e-07	3.0515e-07	2.9423e-07	2.8142e-07	2.7389e-07	2.7646e-07
3.9039e-07	3.8471e-07	3.8048e-07	3.7663e-07	3.7346e-07	3.7073e-07	3.6839e-07	3.6493e-07	3.6332e-07	3.6499e-07	3.6627e-07	3.6086e-07	3.578e-07	3.5613e-07	3.5613e-07	3.6081e-07	3.5897e-07	3.5123e-07	3.4799e-07	3.4627e-07	3.4398e-07	3.4109e-07	3.3858e-07	3.3713e-07	3.3407e-07	3.3306e-07	3.3212e-07	3.3039e-07	3.2849e-07	3.2666e-07	3.2515e-07	3.2404e-07	3.2281e-07	3.2454e-07	3.2615e-07	3.2276e-07	3.1913e-07	3.178e-07	3.1869e-07	3.1613e-07	3.1496e-07	3.1306e-07	3.1445e-07	3.2131e-07	3.3039e-07	3.2621e-07	3.1579e-07	3.12e-07	3.0872e-07	3.1111e-07
3.9335e-07	3.8816e-07	3.8376e-07	3.7986e-07	3.7697e-07	3.7713e-07	3.7541e-07	3.7022e-07	3.6777e-07	3.6805e-07	3.6727e-07	3.6215e-07	3.6075e-07	3.6153e-07	3.68e-07	3.7624e-07	3.7067e-07	3.5936e-07	3.5474e-07	3.5195e-07	3.5017e-07	3.49e-07	3.4805e-07	3.5e-07	3.4838e-07	3.4382e-07	3.407e-07	3.3953e-07	3.3897e-07	3.3429e-07	3.3267e-07	3.3524e-07	3.3067e-07	3.2744e-07	3.2643e-07	3.2498e-07	3.2359e-07	3.2248e-07	3.2159e-07	3.2064e-07	3.1858e-07	3.1774e-07	3.1663e-07	3.1418e-07	3.2298e-07	3.2069e-07	3.1601e-07	3.1401e-07	3.1044e-07	3.0961e-07
3.5479e-07	3.495e-07	3.451e-07	3.4164e-07	3.4404e-07	3.4209e-07	3.3947e-07	3.3574e-07	3.2927e-07	3.2621e-07	3.2398e-07	3.2147e-07	3.1919e-07	3.1796e-07	3.2649e-07	3.3167e-07	3.2064e-07	3.1178e-07	3.1022e-07	3.0799e-07	3.0699e-07	3.1295e-07	3.1457e-07	3.1512e-07	3.0888e-07	3.003e-07	2.983e-07	2.9796e-07	2.9863e-07	2.9284e-07	2.9094e-07	2.9044e-07	2.9083e-07	2.8855e-07	2.8771e-07	2.8465e-07	2.8699e-07	2.8164e-07	2.8058e-07	2.7935e-07	2.7796e-07	2.7713e-07	2.7529e-07	2.7601e-07	2.7607e-07	2.7635e-07	2.7579e-07	2.7635e-07	2.7116e-07	2.6938e-07
3.0002e-07	2.9451e-07	2.9022e-07	2.8732e-07	2.847e-07	2.8186e-07	2.8509e-07	2.8381e-07	2.8253e-07	2.7618e-07	2.7428e-07	2.7339e-07	2.7217e-07	2.8548e-07	3.0381e-07	3.1061e-07	3.0342e-07	2.8654e-07	2.7846e-07	2.6944e-07	2.6487e-07	2.6331e-07	2.7373e-07	2.7635e-07	2.681e-07	2.5919e-07	2.579e-07	2.549e-07	2.5044e-07	2.4799e-07	2.4676e-07	2.4509e-07	2.4308e-07	2.4247e-07	2.3946e-07	2.3846e-07	2.4008e-07	2.3874e-07	2.345e-07	2.3322e-07	2.3266e-07	2.311e-07	2.2971e-07	2.2687e-07	2.2576e-07	2.2525e-07	2.2403e-07	2.2637e-07	2.228e-07	2.218e-07
3.0894e-07	3.0398e-07	2.9991e-07	2.9713e-07	2.9345e-07	2.9156e-07	2.8877e-07	2.8637e-07	2.8376e-07	2.8147e-07	2.8036e-07	2.7963e-07	2.8247e-07	3.0153e-07	3.1551e-07	3.183e-07	3.1072e-07	2.9261e-07	2.7679e-07	2.6955e-07	2.6593e-07	2.6994e-07	2.6888e-07	2.618e-07	2.5829e-07	2.5668e-07	2.5679e-07	2.5361e-07	2.4983e-07	2.4921e-07	2.4654e-07	2.4554e-07	2.4442e-07	2.4281e-07	2.4242e-07	2.4108e-07	2.5506e-07	2.6164e-07	2.5729e-07	2.4849e-07	2.4008e-07	2.3796e-07	2.3723e-07	2.3495e-07	2.3083e-07	2.2938e-07	2.2798e-07	2.252e-07	2.2481e-07	2.2576e-07
3.0671e-07	3.0181e-07	2.9718e-07	2.9312e-07	2.9011e-07	2.8749e-07	2.847e-07	2.8637e-07	2.8342e-07	2.8097e-07	2.7986e-07	2.7818e-07	2.8086e-07	2.9774e-07	3.1028e-07	3.1429e-07	3.071e-07	2.8504e-07	2.7328e-07	2.6693e-07	2.6431e-07	2.6164e-07	2.6314e-07	2.6153e-07	2.5751e-07	2.5283e-07	2.5122e-07	2.5038e-07	2.4832e-07	2.4643e-07	2.4565e-07	2.4498e-07	2.4498e-07	2.4498e-07	2.4058e-07	2.4035e-07	2.5066e-07	2.5506e-07	2.4983e-07	2.4008e-07	2.3835e-07	2.3779e-07	2.3484e-07	2.3233e-07	2.3133e-07	2.3222e-07	2.2871e-07	2.2793e-07	2.2882e-07	2.2765e-07
3.0799e-07	3.0248e-07	2.9763e-07	2.9429e-07	2.9156e-07	2.9178e-07	2.8682e-07	2.8487e-07	2.8331e-07	2.8743e-07	2.8108e-07	2.8114e-07	2.813e-07	2.8325e-07	2.9618e-07	3.0732e-07	3.0348e-07	2.8665e-07	2.7635e-07	2.7239e-07	2.6927e-07	2.6632e-07	2.7133e-07	2.7155e-07	2.6102e-07	2.6225e-07	2.5913e-07	2.6609e-07	2.7077e-07	2.6498e-07	2.5651e-07	2.5467e-07	2.5501e-07	2.5295e-07	2.4955e-07	2.4698e-07	2.4593e-07	2.4414e-07	2.423e-07	2.4097e-07	2.3941e-07	2.3712e-07	2.3662e-07	2.3512e-07	2.3645e-07	2.3289e-07	2.3222e-07	2.3099e-07	2.3322e-07	2.3138e-07
3.242e-07	3.2192e-07	3.1925e-07	3.1094e-07	2.9997e-07	2.9495e-07	2.9111e-07	2.8782e-07	2.8827e-07	2.8142e-07	2.7874e-07	2.7752e-07	2.788e-07	2.7796e-07	2.7211e-07	2.7729e-07	2.7802e-07	2.6832e-07	2.6481e-07	2.6219e-07	2.6086e-07	2.5919e-07	2.6036e-07	2.5668e-07	2.535e-07	2.5178e-07	2.5495e-07	2.7367e-07	2.808e-07	2.7194e-07	2.5958e-07	2.4938e-07	2.4771e-07	2.4242e-07	2.4214e-07	2.3907e-07	2.345e-07	2.3339e-07	2.3311e-07	2.3088e-07	2.2988e-07	2.3144e-07	2.2804e-07	2.2787e-07	2.2336e-07	2.2347e-07	2.2336e-07	2.2085e-07	2.1862e-07	2.1768e-07
3.6404e-07	3.5869e-07	3.5357e-07	3.4304e-07	3.3301e-07	3.2599e-07	3.2264e-07	3.2019e-07	3.173e-07	3.1473e-07	3.1273e-07	3.1072e-07	3.0961e-07	3.1445e-07	3.0983e-07	3.0404e-07	3.0197e-07	3.0008e-07	2.9796e-07	2.9668e-07	2.9384e-07	2.8944e-07	2.8593e-07	2.8387e-07	2.8376e-07	2.8259e-07	2.8108e-07	3.0242e-07	3.0677e-07	3.0092e-07	2.9139e-07	2.8693e-07	2.8392e-07	2.7852e-07	2.764e-07	2.7345e-07	2.6994e-07	2.6843e-07	2.6955e-07	2.6504e-07	2.6353e-07	2.6754e-07	2.6743e-07	2.6359e-07	2.6498e-07	2.6576e-07	2.6058e-07	2.5863e-07	2.5679e-07	2.5467e-07
3.6415e-07	3.554e-07	3.4978e-07	3.456e-07	3.4064e-07	3.3802e-07	3.349e-07	3.3267e-07	3.3184e-07	3.2822e-07	3.2649e-07	3.2381e-07	3.2203e-07	3.2259e-07	3.1841e-07	3.1746e-07	3.1746e-07	3.1367e-07	3.1234e-07	3.1016e-07	3.0888e-07	3.0771e-07	3.0626e-07	3.0721e-07	3.0348e-07	3.0476e-07	3.0721e-07	3.1613e-07	2.9083e-07	2.7239e-07	2.5144e-07	2.4938e-07	2.457e-07	2.4035e-07	2.3751e-07	2.3601e-07	2.3233e-07	2.3088e-07	2.2843e-07	2.2609e-07	2.2442e-07	2.2826e-07	2.2436e-07	2.208e-07	2.1913e-07	2.2442e-07	2.2425e-07	2.2219e-07	2.2169e-07	2.2046e-07
3.4493e-07	3.3663e-07	3.2699e-07	3.1858e-07	3.115e-07	3.0565e-07	3.0041e-07	2.9685e-07	2.9479e-07	2.9278e-07	2.9111e-07	2.8899e-07	2.9523e-07	2.9947e-07	2.9161e-07	2.847e-07	2.8041e-07	2.7891e-07	2.8181e-07	2.7635e-07	2.6977e-07	2.6726e-07	2.6459e-07	2.6275e-07	2.6125e-07	2.5991e-07	2.6325e-07	2.7345e-07	2.8147e-07	2.8236e-07	2.6726e-07	2.6526e-07	2.5946e-07	2.579e-07	2.5495e-07	2.5841e-07	2.5779e-07	2.5261e-07	2.4882e-07	2.4526e-07	2.4281e-07	2.3963e-07	2.3779e-07	2.369e-07	2.3556e-07	2.3612e-07	2.3445e-07	2.3311e-07	2.3172e-07	2.3473e-07
3.3863e-07	3.3418e-07	3.3083e-07	3.3e-07	3.2493e-07	3.3139e-07	3.2721e-07	3.222e-07	3.1317e-07	3.1011e-07	3.0821e-07	3.0766e-07	3.1679e-07	3.1858e-07	3.1005e-07	3.0119e-07	2.9841e-07	2.9674e-07	2.954e-07	2.9334e-07	2.9139e-07	2.8916e-07	2.8749e-07	2.8598e-07	2.8442e-07	2.8409e-07	2.7902e-07	2.8275e-07	2.8481e-07	2.7913e-07	2.7646e-07	2.774e-07	2.7434e-07	2.7217e-07	2.7657e-07	2.9239e-07	2.9078e-07	2.7891e-07	2.7005e-07	2.6726e-07	2.642e-07	2.6231e-07	2.5935e-07	2.5824e-07	2.5774e-07	2.5618e-07	2.5467e-07	2.535e-07	2.5211e-07	2.5049e-07
3.4955e-07	3.4415e-07	3.3997e-07	3.398e-07	3.3964e-07	3.3746e-07	3.295e-07	3.2576e-07	3.2259e-07	3.2069e-07	3.2125e-07	3.2376e-07	3.1863e-07	3.2164e-07	3.1886e-07	3.1161e-07	3.0844e-07	3.0743e-07	3.0593e-07	3.0387e-07	3.0225e-07	3.0036e-07	2.9846e-07	2.9685e-07	2.9473e-07	2.9551e-07	2.9133e-07	2.9e-07	2.8877e-07	2.8788e-07	2.8621e-07	2.8448e-07	2.8309e-07	2.8259e-07	2.8688e-07	2.998e-07	2.998e-07	2.8883e-07	2.8292e-07	2.808e-07	2.8058e-07	2.783e-07	2.7378e-07	2.7306e-07	2.7167e-07	2.7038e-07	2.6882e-07	2.6788e-07	2.6593e-07	2.6414e-07
3.2532e-07	3.1869e-07	3.0966e-07	3.0944e-07	3.0186e-07	3.027e-07	2.9729e-07	2.954e-07	2.9078e-07	2.8777e-07	2.8676e-07	2.8604e-07	2.8632e-07	2.886e-07	2.8164e-07	2.8147e-07	2.7657e-07	2.7635e-07	2.7584e-07	2.735e-07	2.7311e-07	2.7267e-07	2.7228e-07	2.8286e-07	2.9178e-07	2.9022e-07	2.8047e-07	2.7122e-07	2.6899e-07	2.6699e-07	2.6342e-07	2.5896e-07	2.5651e-07	2.5467e-07	2.5735e-07	2.5295e-07	2.5038e-07	2.4799e-07	2.4721e-07	2.4593e-07	2.4403e-07	2.408e-07	2.3985e-07	2.3846e-07	2.3734e-07	2.3578e-07	2.3417e-07	2.3322e-07	2.3244e-07	2.3116e-07
3.1874e-07	3.134e-07	3.095e-07	3.1211e-07	3.0543e-07	3.0175e-07	3.0604e-07	3.0376e-07	2.9785e-07	3.1323e-07	3.139e-07	2.9713e-07	2.9117e-07	2.9044e-07	2.8877e-07	2.9317e-07	2.8727e-07	2.7874e-07	2.827e-07	2.7657e-07	2.7802e-07	2.7178e-07	2.7194e-07	2.8442e-07	2.9061e-07	2.9044e-07	2.822e-07	2.7284e-07	2.6888e-07	2.6671e-07	2.6816e-07	2.6966e-07	2.6559e-07	2.5824e-07	2.5568e-07	2.54e-07	2.53e-07	2.5072e-07	2.5384e-07	2.4671e-07	2.4314e-07	2.4275e-07	2.3969e-07	2.3913e-07	2.3874e-07	2.4654e-07	2.4236e-07	2.3584e-07	2.3528e-07	2.3445e-07
3.1128e-07	3.0532e-07	3.0125e-07	2.9741e-07	2.949e-07	2.9289e-07	2.8866e-07	2.871e-07	2.8459e-07	2.9156e-07	2.9897e-07	2.9256e-07	2.8565e-07	2.8147e-07	2.798e-07	2.764e-07	2.7389e-07	2.7038e-07	2.691e-07	2.6548e-07	2.6543e-07	2.6342e-07	2.632e-07	2.6136e-07	2.6671e-07	2.681e-07	2.6336e-07	2.574e-07	2.5573e-07	2.5395e-07	2.5495e-07	2.6348e-07	2.6437e-07	2.5484e-07	2.4977e-07	2.5172e-07	2.4492e-07	2.4314e-07	2.4052e-07	2.4008e-07	2.3863e-07	2.3673e-07	2.3484e-07	2.35e-07	2.364e-07	2.4024e-07	2.3896e-07	2.3339e-07	2.2915e-07	2.257e-07
3.1111e-07	3.0543e-07	3.0153e-07	3.0231e-07	2.9618e-07	2.9507e-07	2.9061e-07	2.8799e-07	2.8604e-07	2.8415e-07	2.8515e-07	2.8727e-07	2.8197e-07	2.7963e-07	2.7791e-07	2.759e-07	2.7401e-07	2.7222e-07	2.7077e-07	2.6899e-07	2.6676e-07	2.6576e-07	2.6621e-07	2.6487e-07	2.6465e-07	2.6013e-07	2.5835e-07	2.5829e-07	2.6114e-07	2.5729e-07	2.5356e-07	2.5735e-07	2.603e-07	2.5562e-07	2.52e-07	2.5127e-07	2.4999e-07	2.4905e-07	2.462e-07	2.4409e-07	2.4269e-07	2.4108e-07	2.3969e-07	2.3835e-07	2.4437e-07	2.3907e-07	2.3595e-07	2.3461e-07	2.3411e-07	2.3049e-07
3.3212e-07	3.242e-07	3.1986e-07	3.2142e-07	3.1936e-07	3.12e-07	3.0922e-07	3.0487e-07	3.0287e-07	3.0064e-07	2.9796e-07	2.9507e-07	2.9228e-07	2.9495e-07	2.9072e-07	2.8671e-07	2.8565e-07	2.8292e-07	2.8119e-07	2.7947e-07	2.7735e-07	2.7623e-07	2.7473e-07	2.7824e-07	2.8309e-07	2.7428e-07	2.7133e-07	2.6866e-07	2.6726e-07	2.6921e-07	2.6838e-07	2.6359e-07	2.6621e-07	2.6403e-07	2.6297e-07	2.6236e-07	2.564e-07	2.5495e-07	2.5378e-07	2.5534e-07	2.5668e-07	2.6275e-07	2.5428e-07	2.5412e-07	2.5256e-07	2.5049e-07	2.5016e-07	2.4955e-07	2.4665e-07	2.4598e-07
3.3317e-07	3.2933e-07	3.2816e-07	3.2253e-07	3.2771e-07	3.2387e-07	3.1401e-07	3.1e-07	3.0821e-07	3.0498e-07	3.027e-07	3.0292e-07	2.9752e-07	2.9813e-07	2.9551e-07	2.964e-07	2.9111e-07	2.8838e-07	2.8571e-07	2.8437e-07	2.8303e-07	2.8181e-07	2.8047e-07	2.7919e-07	2.813e-07	2.7997e-07	2.7607e-07	2.7456e-07	2.7311e-07	2.7211e-07	2.7022e-07	2.6894e-07	2.6793e-07	2.6665e-07	2.6537e-07	2.6492e-07	2.7323e-07	2.7245e-07	2.6598e-07	2.6253e-07	2.7763e-07	2.7245e-07	2.5935e-07	2.5757e-07	2.5495e-07	2.5322e-07	2.5462e-07	2.51e-07	2.501e-07	2.4966e-07
3.1022e-07	3.0794e-07	3.0036e-07	2.9635e-07	2.9278e-07	2.9033e-07	2.8782e-07	2.8403e-07	2.8164e-07	2.793e-07	2.7835e-07	2.7796e-07	2.7183e-07	2.7061e-07	2.7016e-07	2.7206e-07	2.7005e-07	2.652e-07	2.6353e-07	2.5969e-07	2.5818e-07	2.5612e-07	2.554e-07	2.5345e-07	2.5283e-07	2.5278e-07	2.4827e-07	2.4782e-07	2.462e-07	2.447e-07	2.432e-07	2.4464e-07	2.4136e-07	2.3941e-07	2.3813e-07	2.4119e-07	2.5261e-07	2.5139e-07	2.4047e-07	2.379e-07	2.369e-07	2.3813e-07	2.3105e-07	2.3083e-07	2.2943e-07	2.2704e-07	2.262e-07	2.2531e-07	2.2342e-07	2.2225e-07
3.3891e-07	3.3585e-07	3.2576e-07	3.2081e-07	3.0782e-07	3.0348e-07	3.0086e-07	2.9902e-07	2.9796e-07	2.9423e-07	2.9211e-07	2.8905e-07	2.8693e-07	2.8504e-07	2.8353e-07	2.8337e-07	2.8303e-07	2.788e-07	2.7785e-07	2.7523e-07	2.7384e-07	2.7194e-07	2.7038e-07	2.6877e-07	2.6687e-07	2.6531e-07	2.6531e-07	2.6264e-07	2.6119e-07	2.6002e-07	2.5857e-07	2.5952e-07	2.5679e-07	2.574e-07	2.5378e-07	2.5657e-07	2.681e-07	2.6554e-07	2.5529e-07	2.5389e-07	2.5139e-07	2.476e-07	2.4609e-07	2.4476e-07	2.4375e-07	2.4409e-07	2.408e-07	2.3907e-07	2.3751e-07	2.3662e-07
3.5852e-07	3.529e-07	3.4733e-07	3.3964e-07	3.3067e-07	3.242e-07	3.2476e-07	3.1886e-07	3.1429e-07	3.1117e-07	3.0866e-07	3.061e-07	3.0225e-07	3.0041e-07	2.9707e-07	2.9635e-07	2.9367e-07	2.9211e-07	2.9144e-07	2.8799e-07	2.8554e-07	2.8376e-07	2.8247e-07	2.8119e-07	2.783e-07	2.7662e-07	2.749e-07	2.7378e-07	2.7373e-07	2.7111e-07	2.6994e-07	2.6771e-07	2.6754e-07	2.6777e-07	2.725e-07	2.7217e-07	2.7757e-07	2.7679e-07	2.6899e-07	2.6559e-07	2.6665e-07	2.6648e-07	2.6381e-07	2.6543e-07	2.6136e-07	2.5646e-07	2.5473e-07	2.5322e-07	2.5205e-07	2.5005e-07
3.3735e-07	3.368e-07	3.3317e-07	3.2588e-07	3.1691e-07	3.0632e-07	2.9913e-07	2.9055e-07	2.8632e-07	2.8253e-07	2.8025e-07	2.7467e-07	2.7523e-07	2.7183e-07	2.6726e-07	2.6531e-07	2.6459e-07	2.6097e-07	2.5824e-07	2.5595e-07	2.5478e-07	2.525e-07	2.5044e-07	2.5027e-07	2.4593e-07	2.4431e-07	2.4442e-07	2.423e-07	2.4019e-07	2.3868e-07	2.4269e-07	2.4147e-07	2.3684e-07	2.3512e-07	2.3662e-07	2.3311e-07	2.3344e-07	2.3406e-07	2.2982e-07	2.2915e-07	2.2659e-07	2.3428e-07	2.4325e-07	2.4804e-07	2.4281e-07	2.3383e-07	2.3027e-07	2.2876e-07	2.2832e-07	2.2581e-07
3.471e-07	3.5134e-07	3.5914e-07	3.5457e-07	3.4877e-07	3.422e-07	3.2459e-07	3.1473e-07	3.0743e-07	3.0387e-07	3.0064e-07	3.0147e-07	3.0231e-07	2.9479e-07	2.9039e-07	2.8871e-07	2.8671e-07	2.8587e-07	2.8532e-07	3.0532e-07	3.2097e-07	3.1841e-07	3.1262e-07	3.0103e-07	2.8504e-07	2.7908e-07	2.7545e-07	2.7573e-07	2.7757e-07	2.6933e-07	2.6894e-07	2.6665e-07	2.642e-07	2.6075e-07	2.5946e-07	2.5796e-07	2.5629e-07	2.5556e-07	2.5439e-07	2.5311e-07	2.5211e-07	2.6052e-07	2.8008e-07	2.8749e-07	2.7969e-07	2.5896e-07	2.5228e-07	2.4971e-07	2.481e-07	2.4749e-07
3.8332e-07	3.8087e-07	3.8031e-07	3.7574e-07	3.6995e-07	3.6159e-07	3.5123e-07	3.4454e-07	3.4103e-07	3.3941e-07	3.3535e-07	3.3106e-07	3.2638e-07	3.2526e-07	3.2966e-07	3.2721e-07	3.251e-07	3.242e-07	3.422e-07	3.7173e-07	3.7808e-07	3.6794e-07	3.4961e-07	3.2866e-07	3.1702e-07	3.1418e-07	3.086e-07	3.095e-07	3.0593e-07	2.9869e-07	3.0365e-07	2.9484e-07	2.915e-07	2.905e-07	2.8821e-07	2.8688e-07	2.8571e-07	2.8576e-07	2.9039e-07	2.8504e-07	2.8353e-07	2.8727e-07	3.0799e-07	3.1763e-07	3.1267e-07	2.944e-07	2.8593e-07	2.8481e-07	2.7896e-07	2.7679e-07
3.0805e-07	3.022e-07	2.9646e-07	2.9144e-07	2.8771e-07	2.852e-07	2.8197e-07	2.798e-07	2.7674e-07	2.7373e-07	2.7362e-07	2.6999e-07	2.6609e-07	2.6409e-07	2.6247e-07	2.6236e-07	2.608e-07	2.5924e-07	2.9206e-07	3.0927e-07	2.9724e-07	3.0002e-07	2.7189e-07	2.6843e-07	2.6788e-07	2.5796e-07	2.5629e-07	2.5757e-07	2.4921e-07	2.4359e-07	2.4331e-07	2.3762e-07	2.3612e-07	2.3556e-07	2.3222e-07	2.3127e-07	2.3188e-07	2.2759e-07	2.267e-07	2.2626e-07	2.2787e-07	2.2698e-07	2.3813e-07	2.4877e-07	2.486e-07	2.3723e-07	2.3144e-07	2.2498e-07	2.2147e-07	2.1885e-07
3.5373e-07	3.4855e-07	3.4799e-07	3.4214e-07	3.398e-07	3.3641e-07	3.329e-07	3.3022e-07	3.2805e-07	3.2688e-07	3.2521e-07	3.227e-07	3.2075e-07	3.1891e-07	3.2153e-07	3.1635e-07	3.134e-07	3.1707e-07	3.3902e-07	3.6499e-07	3.7591e-07	3.6081e-07	3.3986e-07	3.2292e-07	3.1312e-07	3.0649e-07	3.0192e-07	3.0359e-07	3.0576e-07	3.0019e-07	2.9624e-07	2.9429e-07	2.9323e-07	2.9267e-07	2.9222e-07	2.9518e-07	2.9044e-07	2.8615e-07	2.8509e-07	2.8348e-07	2.8275e-07	2.8208e-07	2.8364e-07	2.8827e-07	2.9022e-07	2.8409e-07	2.7969e-07	2.7679e-07	2.759e-07	2.7428e-07
3.0437e-07	2.9651e-07	2.9189e-07	2.8838e-07	2.8559e-07	2.8264e-07	2.8002e-07	2.8019e-07	2.783e-07	2.7523e-07	2.7997e-07	2.8181e-07	2.7885e-07	2.7674e-07	2.7501e-07	2.6804e-07	2.6231e-07	2.6219e-07	2.7183e-07	2.9952e-07	3.1295e-07	2.886e-07	2.7752e-07	2.6387e-07	2.6548e-07	2.5607e-07	2.5278e-07	2.5545e-07	2.6008e-07	2.5072e-07	2.53e-07	2.4676e-07	2.4347e-07	2.3852e-07	2.3712e-07	2.4052e-07	2.4225e-07	2.3372e-07	2.3032e-07	2.2704e-07	2.2659e-07	2.2542e-07	2.2308e-07	2.1985e-07	2.1974e-07	2.1762e-07	2.1723e-07	2.1567e-07	2.14e-07	2.1266e-07
3.0476e-07	2.9657e-07	2.9234e-07	2.8933e-07	2.8598e-07	2.8448e-07	2.8181e-07	2.7958e-07	2.8119e-07	2.8793e-07	2.9289e-07	2.8972e-07	2.8676e-07	2.7891e-07	2.7228e-07	2.7206e-07	2.6576e-07	2.627e-07	2.6158e-07	2.6381e-07	2.7685e-07	2.7818e-07	2.6804e-07	2.5841e-07	2.554e-07	2.5306e-07	2.5384e-07	2.54e-07	2.5356e-07	2.4665e-07	2.4604e-07	2.4414e-07	2.4069e-07	2.515e-07	2.4492e-07	2.3695e-07	2.3902e-07	2.4002e-07	2.3395e-07	2.2782e-07	2.2609e-07	2.2548e-07	2.2336e-07	2.2252e-07	2.2057e-07	2.1835e-07	2.1835e-07	2.1723e-07	2.1589e-07	2.1701e-07
2.9128e-07	2.8799e-07	2.803e-07	2.7768e-07	2.7479e-07	2.7038e-07	2.744e-07	2.7311e-07	2.6398e-07	2.6777e-07	2.6576e-07	2.7206e-07	2.7651e-07	2.6782e-07	2.5919e-07	2.579e-07	2.5339e-07	2.5049e-07	2.4799e-07	2.4398e-07	2.4175e-07	2.3941e-07	2.3517e-07	2.3484e-07	2.3422e-07	2.3311e-07	2.3099e-07	2.291e-07	2.2681e-07	2.2782e-07	2.2899e-07	2.2381e-07	2.242e-07	2.2336e-07	2.257e-07	2.2314e-07	2.1818e-07	2.1667e-07	2.1567e-07	2.15e-07	2.1227e-07	2.1428e-07	2.135e-07	2.1255e-07	2.1489e-07	2.1411e-07	2.0865e-07	2.0637e-07	2.0397e-07	2.0347e-07
2.852e-07	2.7924e-07	2.7523e-07	2.7167e-07	2.6804e-07	2.6531e-07	2.6203e-07	2.5935e-07	2.5924e-07	2.6141e-07	2.5679e-07	2.5144e-07	2.4944e-07	2.4726e-07	2.457e-07	2.4303e-07	2.4203e-07	2.4058e-07	2.3829e-07	2.3718e-07	2.3813e-07	2.413e-07	2.3506e-07	2.3378e-07	2.3339e-07	2.33e-07	2.3138e-07	2.3188e-07	2.3528e-07	2.3272e-07	2.3545e-07	2.3779e-07	2.3077e-07	2.2665e-07	2.2386e-07	2.2197e-07	2.2135e-07	2.2102e-07	2.1628e-07	2.1745e-07	2.1472e-07	2.1105e-07	2.0921e-07	2.0804e-07	2.0765e-07	2.0748e-07	2.0603e-07	2.086e-07	2.0821e-07	2.0336e-07
2.7935e-07	2.7384e-07	2.6972e-07	2.6754e-07	2.6292e-07	2.598e-07	2.574e-07	2.5506e-07	2.5272e-07	2.5033e-07	2.4955e-07	2.4687e-07	2.4459e-07	2.4214e-07	2.4097e-07	2.3835e-07	2.3907e-07	2.3874e-07	2.3512e-07	2.3372e-07	2.3172e-07	2.3005e-07	2.2871e-07	2.2732e-07	2.2615e-07	2.2475e-07	2.2186e-07	2.2163e-07	2.2297e-07	2.2403e-07	2.3651e-07	2.398e-07	2.3138e-07	2.262e-07	2.2392e-07	2.1723e-07	2.1584e-07	2.14e-07	2.1289e-07	2.1233e-07	2.1116e-07	2.0759e-07	2.0692e-07	2.0531e-07	2.0431e-07	2.0302e-07	2.013e-07	1.9974e-07	1.9996e-07	1.9834e-07
2.8036e-07	2.7484e-07	2.71e-07	2.6732e-07	2.6303e-07	2.6108e-07	2.5885e-07	2.5629e-07	2.5495e-07	2.52e-07	2.4927e-07	2.4754e-07	2.4542e-07	2.4359e-07	2.4336e-07	2.4242e-07	2.4425e-07	2.4983e-07	2.4258e-07	2.3807e-07	2.359e-07	2.345e-07	2.3244e-07	2.3027e-07	2.2932e-07	2.2904e-07	2.3294e-07	2.3289e-07	2.2559e-07	2.2124e-07	2.2704e-07	2.311e-07	2.2854e-07	2.2559e-07	2.194e-07	2.2236e-07	2.1539e-07	2.1461e-07	2.1339e-07	2.1166e-07	2.0988e-07	2.0731e-07	2.0648e-07	2.0542e-07	2.0614e-07	2.0286e-07	2.0174e-07	2.0002e-07	2.0302e-07	2.0219e-07
2.7919e-07	2.7401e-07	2.7094e-07	2.6749e-07	2.6331e-07	2.6197e-07	2.6086e-07	2.6008e-07	2.6565e-07	2.6682e-07	2.6381e-07	2.5746e-07	2.5495e-07	2.5573e-07	2.4871e-07	2.4676e-07	2.5278e-07	2.52e-07	2.4314e-07	2.3913e-07	2.3684e-07	2.3517e-07	2.3361e-07	2.3539e-07	2.3155e-07	2.4314e-07	2.4871e-07	2.4938e-07	2.4013e-07	2.2982e-07	2.2169e-07	2.1734e-07	2.1634e-07	2.1311e-07	2.1255e-07	2.1216e-07	2.1038e-07	2.0887e-07	2.0782e-07	2.0949e-07	2.1138e-07	2.1584e-07	2.1032e-07	2.0971e-07	2.0977e-07	2.023e-07	2.013e-07	2.0013e-07	1.9773e-07	1.9751e-07
2.8459e-07	2.8387e-07	2.7529e-07	2.7044e-07	2.7278e-07	2.8342e-07	2.749e-07	2.7557e-07	2.8303e-07	2.8119e-07	2.7211e-07	2.6086e-07	2.5534e-07	2.5144e-07	2.4877e-07	2.4464e-07	2.4559e-07	2.4286e-07	2.4119e-07	2.4041e-07	2.3701e-07	2.3695e-07	2.3239e-07	2.3183e-07	2.5551e-07	2.7155e-07	2.5774e-07	2.5829e-07	2.3105e-07	2.2219e-07	2.1706e-07	2.1121e-07	2.1066e-07	2.077e-07	2.1021e-07	2.0598e-07	2.0447e-07	2.0275e-07	2.018e-07	2.0353e-07	2.1411e-07	2.2208e-07	2.1589e-07	2.0899e-07	2.0614e-07	2.0676e-07	2.0358e-07	2.0213e-07	2.0029e-07	1.9745e-07
2.8069e-07	2.7662e-07	2.7423e-07	2.71e-07	2.7306e-07	2.7913e-07	2.72e-07	2.7724e-07	2.808e-07	2.7852e-07	2.6994e-07	2.6097e-07	2.5501e-07	2.6409e-07	2.6738e-07	2.5852e-07	2.5283e-07	2.4782e-07	2.4498e-07	2.54e-07	2.608e-07	2.4955e-07	2.4386e-07	2.5367e-07	2.7484e-07	2.7089e-07	2.6208e-07	2.4687e-07	2.286e-07	2.3127e-07	2.2498e-07	2.2771e-07	2.2308e-07	2.2063e-07	2.1645e-07	2.1495e-07	2.1539e-07	2.0904e-07	2.0843e-07	2.0715e-07	2.0681e-07	2.1261e-07	2.0837e-07	2.0375e-07	2.072e-07	2.0598e-07	2.0503e-07	2.0275e-07	1.9862e-07	1.9383e-07
2.793e-07	2.7618e-07	2.6966e-07	2.6342e-07	2.666e-07	2.647e-07	2.5673e-07	2.5512e-07	2.6236e-07	2.6855e-07	2.6336e-07	2.5467e-07	2.6253e-07	2.7629e-07	2.7796e-07	2.6799e-07	2.554e-07	2.5657e-07	2.4921e-07	2.4364e-07	2.4838e-07	2.5083e-07	2.4191e-07	2.53e-07	2.7902e-07	2.666e-07	2.6966e-07	2.6693e-07	2.418e-07	2.2353e-07	2.345e-07	2.3222e-07	2.2152e-07	2.1667e-07	2.1333e-07	2.1528e-07	2.1467e-07	2.0848e-07	2.0681e-07	2.0548e-07	2.038e-07	2.0414e-07	1.9957e-07	1.989e-07	2.1584e-07	2.0776e-07	2.0241e-07	1.9762e-07	1.9857e-07	1.9417e-07
2.8515e-07	2.8153e-07	2.7479e-07	2.7005e-07	2.6219e-07	2.5985e-07	2.5601e-07	2.5406e-07	2.5161e-07	2.4921e-07	2.452e-07	2.4771e-07	2.5924e-07	2.7022e-07	2.7183e-07	2.647e-07	2.5161e-07	2.5244e-07	2.4537e-07	2.3902e-07	2.4503e-07	2.5283e-07	2.4386e-07	2.4988e-07	2.7846e-07	2.6754e-07	2.7033e-07	2.6777e-07	2.598e-07	2.3344e-07	2.3161e-07	2.3289e-07	2.2063e-07	2.2531e-07	2.2007e-07	2.1701e-07	2.1183e-07	2.1038e-07	2.0982e-07	2.052e-07	2.0314e-07	2.0124e-07	1.9951e-07	1.9801e-07	1.974e-07	1.9528e-07	1.9261e-07	1.9138e-07	1.9105e-07	1.8943e-07
2.7701e-07	2.7601e-07	2.6916e-07	2.6526e-07	2.5802e-07	2.5339e-07	2.5144e-07	2.5022e-07	2.4737e-07	2.4637e-07	2.452e-07	2.4414e-07	2.437e-07	2.5144e-07	2.5456e-07	2.4916e-07	2.4409e-07	2.4113e-07	2.4425e-07	2.3645e-07	2.4609e-07	2.549e-07	2.4515e-07	2.4882e-07	2.769e-07	2.6426e-07	2.6938e-07	2.6738e-07	2.6164e-07	2.4849e-07	2.3071e-07	2.2509e-07	2.3149e-07	2.2665e-07	2.2303e-07	2.1868e-07	2.1991e-07	2.1506e-07	2.0821e-07	2.0514e-07	2.0163e-07	1.9918e-07	1.9879e-07	1.9717e-07	1.9288e-07	1.906e-07	1.8837e-07	1.9489e-07	2.0029e-07	1.9478e-07
2.7317e-07	2.6732e-07	2.6364e-07	2.5963e-07	2.5679e-07	2.5467e-07	2.5857e-07	2.5233e-07	2.5217e-07	2.4732e-07	2.4359e-07	2.4152e-07	2.4035e-07	2.3757e-07	2.3617e-07	2.3528e-07	2.3723e-07	2.3161e-07	2.3211e-07	2.3261e-07	2.3734e-07	2.3445e-07	2.3902e-07	2.4253e-07	2.7857e-07	2.9495e-07	2.7434e-07	2.7395e-07	2.569e-07	2.4905e-07	2.4047e-07	2.2559e-07	2.2982e-07	2.2598e-07	2.218e-07	2.1957e-07	2.1818e-07	2.1322e-07	2.106e-07	2.0815e-07	2.062e-07	2.0809e-07	2.0514e-07	2.0258e-07	2.0258e-07	2.0419e-07	2.0403e-07	2.1996e-07	2.2631e-07	2.1422e-07
2.8275e-07	2.7791e-07	2.7467e-07	2.6888e-07	2.6537e-07	2.6414e-07	2.6052e-07	2.5907e-07	2.5445e-07	2.5239e-07	2.4944e-07	2.4838e-07	2.4648e-07	2.4431e-07	2.4253e-07	2.4119e-07	2.408e-07	2.4275e-07	2.5044e-07	2.4988e-07	2.5033e-07	2.4242e-07	2.4414e-07	2.6593e-07	2.8715e-07	2.9763e-07	2.8002e-07	2.6894e-07	2.6665e-07	2.4303e-07	2.3707e-07	2.3729e-07	2.3032e-07	2.2592e-07	2.2503e-07	2.2431e-07	2.2837e-07	2.1907e-07	2.155e-07	2.1478e-07	2.1489e-07	2.2715e-07	2.1573e-07	2.1211e-07	2.0837e-07	2.0848e-07	2.1166e-07	2.3127e-07	2.3896e-07	2.3222e-07
2.6058e-07	2.5456e-07	2.5328e-07	2.4788e-07	2.452e-07	2.423e-07	2.3896e-07	2.3684e-07	2.3467e-07	2.3701e-07	2.3617e-07	2.3461e-07	2.3027e-07	2.291e-07	2.3796e-07	2.3333e-07	2.2927e-07	2.5295e-07	2.6375e-07	2.5462e-07	2.3868e-07	2.2787e-07	2.3734e-07	2.5718e-07	2.6476e-07	2.7161e-07	2.7284e-07	2.4771e-07	2.3957e-07	2.2102e-07	2.2085e-07	2.1461e-07	2.0965e-07	2.0977e-07	2.018e-07	2.0185e-07	1.9617e-07	1.9483e-07	1.9344e-07	1.9305e-07	1.9121e-07	1.8943e-07	1.867e-07	1.872e-07	1.8865e-07	1.8703e-07	1.8921e-07	2.0653e-07	2.1311e-07	2.1138e-07
2.637e-07	2.5607e-07	2.5205e-07	2.4916e-07	2.4632e-07	2.452e-07	2.4197e-07	2.3807e-07	2.364e-07	2.3461e-07	2.32e-07	2.3551e-07	2.3255e-07	2.3222e-07	2.3344e-07	2.3551e-07	2.4632e-07	2.6509e-07	2.6999e-07	2.6052e-07	2.4398e-07	2.3333e-07	2.3283e-07	2.4381e-07	2.5005e-07	2.5907e-07	2.6331e-07	2.5874e-07	2.4587e-07	2.301e-07	2.2046e-07	2.1328e-07	2.0921e-07	2.0559e-07	2.0581e-07	1.994e-07	1.9829e-07	1.984e-07	1.9417e-07	1.9344e-07	1.9194e-07	1.9261e-07	1.9004e-07	1.9043e-07	1.8865e-07	1.8731e-07	1.9339e-07	1.9901e-07	1.9634e-07	1.9222e-07
2.5495e-07	2.4977e-07	2.4676e-07	2.4381e-07	2.4152e-07	2.4242e-07	2.3818e-07	2.3991e-07	2.5122e-07	2.5707e-07	2.5311e-07	2.4676e-07	2.4113e-07	2.3172e-07	2.291e-07	2.286e-07	2.3434e-07	2.4526e-07	2.4921e-07	2.4303e-07	2.286e-07	2.2057e-07	2.1679e-07	2.1238e-07	2.0414e-07	2.1361e-07	2.2882e-07	2.2804e-07	2.2041e-07	2.1038e-07	2.0152e-07	1.9701e-07	1.9405e-07	1.9138e-07	1.8976e-07	1.8859e-07	1.882e-07	1.8397e-07	1.8258e-07	1.8068e-07	1.8202e-07	1.8046e-07	1.7756e-07	1.7712e-07	1.7684e-07	1.7472e-07	1.765e-07	1.7572e-07	1.7489e-07	1.7177e-07
2.6509e-07	2.5896e-07	2.4938e-07	2.4398e-07	2.4643e-07	2.3879e-07	2.3723e-07	2.4386e-07	2.5467e-07	2.5462e-07	2.4849e-07	2.4314e-07	2.3835e-07	2.2681e-07	2.2002e-07	2.1484e-07	2.1138e-07	2.1656e-07	2.2057e-07	2.1601e-07	2.0837e-07	2.0681e-07	2.0263e-07	1.9695e-07	1.9389e-07	1.9823e-07	2.047e-07	1.9951e-07	1.9316e-07	1.8871e-07	1.8614e-07	1.8492e-07	1.8358e-07	1.8102e-07	1.7873e-07	1.7829e-07	1.7812e-07	1.7522e-07	1.7528e-07	1.7455e-07	1.7405e-07	1.7093e-07	1.7015e-07	1.6815e-07	1.6664e-07	1.662e-07	1.6469e-07	1.6319e-07	1.6263e-07	1.6291e-07
3.5067e-07	3.4265e-07	3.3629e-07	3.3306e-07	3.3022e-07	3.2521e-07	3.2777e-07	3.2833e-07	3.2888e-07	3.2744e-07	3.1785e-07	3.1145e-07	3.0844e-07	3.0671e-07	3.0409e-07	3.0259e-07	3.0053e-07	2.9919e-07	2.9741e-07	2.9562e-07	2.9378e-07	2.9317e-07	2.9618e-07	2.9763e-07	2.9774e-07	2.8972e-07	2.8626e-07	2.8465e-07	2.8303e-07	2.8231e-07	2.8119e-07	2.7947e-07	2.7791e-07	2.7601e-07	2.7518e-07	2.7395e-07	2.7579e-07	2.881e-07	2.7924e-07	2.7779e-07	2.7657e-07	2.7529e-07	2.6821e-07	2.6671e-07	2.6476e-07	2.6348e-07	2.6225e-07	2.618e-07	2.5985e-07	2.6197e-07
2.4888e-07	2.432e-07	2.4013e-07	2.3573e-07	2.3261e-07	2.3138e-07	2.2921e-07	2.2325e-07	2.2269e-07	2.1963e-07	2.1684e-07	2.1662e-07	2.1322e-07	2.1149e-07	2.1116e-07	2.0692e-07	2.0559e-07	2.0408e-07	2.0314e-07	2.0263e-07	2.0191e-07	2.101e-07	2.0954e-07	2.1055e-07	2.1823e-07	2.0581e-07	1.9946e-07	1.9645e-07	1.9433e-07	1.9238e-07	1.9015e-07	1.8937e-07	1.8754e-07	1.8692e-07	1.8681e-07	1.8464e-07	1.8107e-07	1.8687e-07	1.8453e-07	2.0174e-07	2.1511e-07	2.1534e-07	2.0247e-07	1.8854e-07	1.8213e-07	1.7851e-07	1.7439e-07	1.716e-07	1.6915e-07	1.6937e-07
2.2982e-07	2.2459e-07	2.2018e-07	2.1823e-07	2.1277e-07	2.0915e-07	2.0648e-07	2.047e-07	2.0325e-07	2.0074e-07	1.9879e-07	1.9673e-07	1.9578e-07	1.9645e-07	1.9868e-07	1.9277e-07	1.9015e-07	1.8859e-07	1.8731e-07	1.8976e-07	1.896e-07	1.9729e-07	1.9779e-07	1.8993e-07	1.8352e-07	1.813e-07	1.7962e-07	1.7884e-07	1.838e-07	1.7528e-07	1.7277e-07	1.7277e-07	1.7082e-07	1.7439e-07	1.8174e-07	1.8397e-07	1.7054e-07	1.6575e-07	1.6458e-07	1.8107e-07	1.9795e-07	1.9862e-07	1.8954e-07	1.7288e-07	1.6531e-07	1.6781e-07	1.6542e-07	1.5728e-07	1.5377e-07	1.5333e-07
2.2971e-07	2.2369e-07	2.1918e-07	2.1567e-07	2.1328e-07	2.1016e-07	2.0715e-07	2.0481e-07	2.0197e-07	1.9985e-07	2.0024e-07	1.9639e-07	1.9433e-07	1.979e-07	1.9478e-07	1.9255e-07	1.9021e-07	1.8837e-07	1.8776e-07	1.8631e-07	1.8497e-07	1.9066e-07	1.9483e-07	1.9071e-07	1.838e-07	1.8202e-07	1.8085e-07	1.8068e-07	1.7623e-07	1.7517e-07	1.7205e-07	1.6999e-07	1.687e-07	1.7422e-07	1.8871e-07	1.9467e-07	1.8414e-07	1.7517e-07	1.7182e-07	1.784e-07	1.935e-07	1.9556e-07	1.8559e-07	1.7355e-07	1.643e-07	1.6035e-07	1.5762e-07	1.5873e-07	1.5567e-07	1.5054e-07
2.3071e-07	2.2358e-07	2.1929e-07	2.1807e-07	2.1367e-07	2.1027e-07	2.0754e-07	2.0876e-07	2.0497e-07	2.0442e-07	1.9918e-07	1.9756e-07	1.9963e-07	1.9734e-07	1.9183e-07	1.9244e-07	1.8976e-07	1.8503e-07	1.8397e-07	1.8386e-07	1.8642e-07	1.7968e-07	1.7818e-07	1.76e-07	1.7455e-07	1.7322e-07	1.735e-07	1.7116e-07	1.7405e-07	1.7355e-07	1.7806e-07	1.7745e-07	1.7305e-07	1.7277e-07	1.852e-07	1.9099e-07	1.8826e-07	1.8096e-07	1.7249e-07	1.6909e-07	1.7968e-07	1.8224e-07	1.7288e-07	1.6308e-07	1.6051e-07	1.5717e-07	1.5305e-07	1.5043e-07	1.4887e-07	1.4631e-07
2.2915e-07	2.2353e-07	2.1913e-07	2.1517e-07	2.1205e-07	2.0943e-07	2.0943e-07	2.0653e-07	2.0347e-07	2.0046e-07	1.984e-07	1.955e-07	1.9344e-07	1.9461e-07	1.896e-07	1.867e-07	1.8442e-07	1.8609e-07	1.8726e-07	1.8235e-07	1.8336e-07	1.7918e-07	1.76e-07	1.7428e-07	1.7272e-07	1.7143e-07	1.6982e-07	1.6798e-07	1.6709e-07	1.711e-07	1.7127e-07	1.6976e-07	1.6636e-07	1.6447e-07	1.7567e-07	1.8531e-07	1.8843e-07	1.8993e-07	1.8074e-07	1.6926e-07	1.6324e-07	1.6152e-07	1.5845e-07	1.5461e-07	1.555e-07	1.5004e-07	1.4837e-07	1.4742e-07	1.4592e-07	1.448e-07
2.2821e-07	2.233e-07	2.2174e-07	2.1606e-07	2.1394e-07	2.1589e-07	2.1433e-07	2.0759e-07	2.0364e-07	2.0158e-07	1.9929e-07	1.9734e-07	1.9756e-07	1.9528e-07	1.9138e-07	1.93e-07	1.9305e-07	1.9077e-07	1.833e-07	1.818e-07	1.8508e-07	1.8319e-07	1.7723e-07	1.7584e-07	1.7879e-07	1.7299e-07	1.7171e-07	1.7004e-07	1.6865e-07	1.6753e-07	1.6508e-07	1.6414e-07	1.6586e-07	1.6625e-07	1.7806e-07	1.9283e-07	1.9138e-07	1.8932e-07	1.7884e-07	1.6636e-07	1.6291e-07	1.6263e-07	1.5901e-07	1.5439e-07	1.5745e-07	1.5333e-07	1.5316e-07	1.5712e-07	1.5907e-07	1.5388e-07
2.2609e-07	2.2085e-07	2.1667e-07	2.1339e-07	2.0993e-07	2.0843e-07	2.0631e-07	2.0236e-07	2.0096e-07	1.9801e-07	1.9779e-07	1.9873e-07	2.0375e-07	1.9517e-07	1.8748e-07	1.8581e-07	1.8425e-07	1.8107e-07	1.7985e-07	1.7717e-07	1.7578e-07	1.7455e-07	1.7288e-07	1.7149e-07	1.6999e-07	1.6809e-07	1.6703e-07	1.6542e-07	1.6414e-07	1.6341e-07	1.6241e-07	1.6246e-07	1.6213e-07	1.6046e-07	1.6213e-07	1.7929e-07	1.7639e-07	1.6971e-07	1.6436e-07	1.6174e-07	1.594e-07	1.5845e-07	1.5622e-07	1.5377e-07	1.5773e-07	1.6224e-07	1.7478e-07	1.8364e-07	1.8091e-07	1.7071e-07
2.2531e-07	2.2286e-07	2.1885e-07	2.1261e-07	2.1328e-07	2.0971e-07	2.0564e-07	2.0559e-07	2.0247e-07	1.9656e-07	1.9467e-07	1.9528e-07	1.979e-07	1.9567e-07	1.8932e-07	1.8692e-07	1.8703e-07	1.8174e-07	1.8035e-07	1.7806e-07	1.7606e-07	1.7467e-07	1.7277e-07	1.7205e-07	1.6976e-07	1.6915e-07	1.677e-07	1.6558e-07	1.6631e-07	1.6441e-07	1.6352e-07	1.6202e-07	1.6319e-07	1.6664e-07	1.6146e-07	1.5879e-07	1.5617e-07	1.5505e-07	1.5388e-07	1.5277e-07	1.5166e-07	1.5383e-07	1.6035e-07	1.506e-07	1.4904e-07	1.5673e-07	1.7818e-07	1.9105e-07	1.916e-07	1.833e-07
2.2514e-07	2.2035e-07	2.174e-07	2.1272e-07	2.1055e-07	2.0715e-07	2.0431e-07	2.0163e-07	1.9907e-07	1.9612e-07	1.9378e-07	1.9127e-07	1.8915e-07	1.8787e-07	1.9099e-07	1.8692e-07	1.8414e-07	1.8235e-07	1.8352e-07	1.8057e-07	1.7896e-07	1.7728e-07	1.7812e-07	1.8063e-07	1.8001e-07	1.7662e-07	1.7896e-07	1.8603e-07	1.9149e-07	1.8631e-07	1.7829e-07	1.7333e-07	1.6999e-07	1.7194e-07	1.7366e-07	1.7299e-07	1.6954e-07	1.6402e-07	1.5962e-07	1.5923e-07	1.5673e-07	1.5383e-07	1.5338e-07	1.5166e-07	1.5277e-07	1.526e-07	1.7372e-07	1.9288e-07	1.9483e-07	1.862e-07
2.3016e-07	2.2592e-07	2.2486e-07	2.2236e-07	2.1506e-07	2.0737e-07	2.0403e-07	2.0152e-07	1.9985e-07	1.9773e-07	1.9333e-07	1.9422e-07	1.9127e-07	1.8793e-07	1.872e-07	1.8592e-07	1.8692e-07	1.867e-07	1.8898e-07	1.8208e-07	1.8068e-07	1.818e-07	1.7957e-07	1.8263e-07	1.8258e-07	1.8425e-07	1.9099e-07	1.935e-07	1.9545e-07	1.9366e-07	1.8425e-07	1.7667e-07	1.6893e-07	1.6575e-07	1.6848e-07	1.6882e-07	1.6135e-07	1.5795e-07	1.5416e-07	1.5188e-07	1.5026e-07	1.5338e-07	1.5572e-07	1.5322e-07	1.5305e-07	1.5489e-07	1.6642e-07	1.8559e-07	1.8837e-07	1.7951e-07
2.2564e-07	2.1823e-07	2.1472e-07	2.1311e-07	2.0743e-07	2.0447e-07	2.0509e-07	1.9935e-07	1.9723e-07	1.9495e-07	1.9244e-07	1.9038e-07	1.8765e-07	1.8598e-07	1.8403e-07	1.8364e-07	1.8174e-07	1.8029e-07	1.8052e-07	1.7901e-07	1.7578e-07	1.7628e-07	1.7478e-07	1.7656e-07	1.7344e-07	1.7539e-07	1.8464e-07	1.8525e-07	1.8971e-07	1.9417e-07	1.8653e-07	1.7478e-07	1.6965e-07	1.662e-07	1.6759e-07	1.6046e-07	1.594e-07	1.6202e-07	1.565e-07	1.5745e-07	1.5784e-07	1.6503e-07	1.643e-07	1.5678e-07	1.545e-07	1.5266e-07	1.5617e-07	1.7361e-07	1.76e-07	1.6943e-07
2.3083e-07	2.2498e-07	2.2002e-07	2.164e-07	2.1082e-07	2.0726e-07	2.0442e-07	2.0202e-07	1.9946e-07	1.979e-07	1.9634e-07	2.0096e-07	1.9489e-07	1.9099e-07	1.9054e-07	1.911e-07	1.8731e-07	1.8486e-07	1.8364e-07	1.8191e-07	1.7818e-07	1.7584e-07	1.7394e-07	1.7394e-07	1.7974e-07	1.7221e-07	1.7082e-07	1.706e-07	1.8063e-07	1.8447e-07	1.8436e-07	1.7355e-07	1.6937e-07	1.6586e-07	1.6263e-07	1.5968e-07	1.5834e-07	1.6363e-07	1.6157e-07	1.545e-07	1.5739e-07	1.5583e-07	1.526e-07	1.4881e-07	1.4826e-07	1.4636e-07	1.4831e-07	1.5817e-07	1.5427e-07	1.492e-07
2.242e-07	2.1929e-07	2.1461e-07	2.1445e-07	2.0887e-07	2.0486e-07	2.0202e-07	2.0013e-07	1.9896e-07	1.9489e-07	1.9166e-07	1.8993e-07	1.9021e-07	1.8648e-07	1.8469e-07	1.8163e-07	1.8007e-07	1.8196e-07	1.8547e-07	1.813e-07	1.7539e-07	1.7405e-07	1.7712e-07	1.7411e-07	1.7077e-07	1.7065e-07	1.7951e-07	1.8068e-07	1.7689e-07	1.7138e-07	1.6631e-07	1.6408e-07	1.6246e-07	1.6096e-07	1.6235e-07	1.5985e-07	1.5929e-07	1.6336e-07	1.5444e-07	1.5288e-07	1.5171e-07	1.5037e-07	1.5617e-07	1.5895e-07	1.5043e-07	1.4759e-07	1.453e-07	1.4308e-07	1.4347e-07	1.477e-07
2.3172e-07	2.2642e-07	2.1773e-07	2.1389e-07	2.091e-07	2.0665e-07	2.0302e-07	2.0208e-07	1.979e-07	1.9924e-07	1.999e-07	1.9578e-07	1.9378e-07	1.916e-07	1.8664e-07	1.8425e-07	1.8247e-07	1.833e-07	1.8169e-07	1.7979e-07	1.7962e-07	1.7372e-07	1.7416e-07	1.7283e-07	1.7857e-07	2.0018e-07	2.0871e-07	2.0698e-07	2.0236e-07	1.9155e-07	1.7756e-07	1.7093e-07	1.6798e-07	1.6709e-07	1.6191e-07	1.5946e-07	1.594e-07	1.5773e-07	1.5388e-07	1.5277e-07	1.5149e-07	1.5032e-07	1.4915e-07	1.5043e-07	1.5021e-07	1.5561e-07	1.5411e-07	1.4798e-07	1.462e-07	1.4452e-07
2.2375e-07	2.1823e-07	2.1534e-07	2.111e-07	2.0809e-07	2.0926e-07	2.0275e-07	2.0414e-07	2.0336e-07	1.9851e-07	2.0052e-07	1.9673e-07	1.9093e-07	1.9244e-07	1.8737e-07	1.8425e-07	1.828e-07	1.8118e-07	1.7968e-07	1.7873e-07	1.7801e-07	1.7851e-07	1.838e-07	1.8074e-07	1.9249e-07	2.0821e-07	2.1255e-07	2.0971e-07	2.0325e-07	1.9188e-07	1.7979e-07	1.7428e-07	1.6787e-07	1.6414e-07	1.6341e-07	1.6029e-07	1.5823e-07	1.5556e-07	1.5422e-07	1.5333e-07	1.5199e-07	1.5082e-07	1.4848e-07	1.4737e-07	1.4709e-07	1.5728e-07	1.555e-07	1.492e-07	1.4653e-07	1.4631e-07
2.2275e-07	2.1623e-07	2.1155e-07	2.0871e-07	2.0704e-07	2.0353e-07	2.0013e-07	2.0041e-07	1.9534e-07	1.9405e-07	1.9561e-07	1.9222e-07	1.8804e-07	1.8581e-07	1.8403e-07	1.8208e-07	1.8107e-07	1.7946e-07	1.7751e-07	1.7946e-07	1.7645e-07	1.7745e-07	1.7589e-07	1.7305e-07	1.8336e-07	2.0169e-07	2.0653e-07	2.0247e-07	1.9277e-07	1.8235e-07	1.7394e-07	1.6815e-07	1.6469e-07	1.6118e-07	1.5773e-07	1.5661e-07	1.5595e-07	1.5277e-07	1.5466e-07	1.54e-07	1.501e-07	1.4803e-07	1.4753e-07	1.4737e-07	1.4508e-07	1.4324e-07	1.4157e-07	1.4079e-07	1.3984e-07	1.4308e-07
2.1818e-07	2.1244e-07	2.077e-07	2.0481e-07	2.0096e-07	1.9795e-07	1.9506e-07	1.9316e-07	1.9004e-07	1.8781e-07	1.8592e-07	1.8364e-07	1.8208e-07	1.8425e-07	1.8141e-07	1.8007e-07	1.7946e-07	1.7639e-07	1.8074e-07	1.8341e-07	1.8453e-07	1.8102e-07	1.813e-07	1.7845e-07	1.7857e-07	1.8603e-07	1.8882e-07	1.828e-07	1.7416e-07	1.7021e-07	1.7283e-07	1.7116e-07	1.6675e-07	1.6263e-07	1.5968e-07	1.5873e-07	1.5784e-07	1.5221e-07	1.5388e-07	1.5115e-07	1.4714e-07	1.4826e-07	1.4508e-07	1.4391e-07	1.4296e-07	1.4129e-07	1.3884e-07	1.3801e-07	1.3884e-07	1.3717e-07
2.189e-07	2.1394e-07	2.0988e-07	2.0715e-07	2.0236e-07	1.9957e-07	1.9578e-07	1.9339e-07	1.9116e-07	1.8865e-07	1.8837e-07	1.882e-07	1.8625e-07	1.8358e-07	1.8169e-07	1.804e-07	1.8057e-07	1.7584e-07	1.75e-07	1.7433e-07	1.7255e-07	1.7088e-07	1.6954e-07	1.6687e-07	1.6497e-07	1.6285e-07	1.6196e-07	1.6191e-07	1.5812e-07	1.5856e-07	1.6414e-07	1.6313e-07	1.5806e-07	1.5517e-07	1.5862e-07	1.5466e-07	1.5121e-07	1.4893e-07	1.4725e-07	1.4486e-07	1.438e-07	1.4241e-07	1.4118e-07	1.3996e-07	1.4018e-07	1.4007e-07	1.3834e-07	1.3695e-07	1.3555e-07	1.3461e-07
2.2152e-07	2.1745e-07	2.1651e-07	2.1071e-07	2.1155e-07	2.1105e-07	2.0887e-07	1.9912e-07	1.96e-07	1.9417e-07	2.0174e-07	2.1088e-07	2.1367e-07	2.1094e-07	2.0403e-07	1.9818e-07	1.9205e-07	1.8447e-07	1.7935e-07	1.7422e-07	1.7116e-07	1.7054e-07	1.6714e-07	1.6519e-07	1.6185e-07	1.6085e-07	1.5895e-07	1.5628e-07	1.5494e-07	1.5366e-07	1.5216e-07	1.5076e-07	1.4876e-07	1.4753e-07	1.4642e-07	1.4497e-07	1.4358e-07	1.4263e-07	1.4135e-07	1.3968e-07	1.3912e-07	1.3795e-07	1.4179e-07	1.414e-07	1.3918e-07	1.365e-07	1.3812e-07	1.3533e-07	1.3366e-07	1.3661e-07
5.2834e-07	5.2355e-07	5.2311e-07	5.216e-07	5.2138e-07	5.1408e-07	5.0544e-07	4.9737e-07	4.9129e-07	4.9035e-07	5.1168e-07	5.2455e-07	5.2706e-07	5.2428e-07	5.1893e-07	5.1202e-07	5.0511e-07	4.9859e-07	4.8745e-07	4.7876e-07	4.7541e-07	4.6717e-07	4.6271e-07	4.6082e-07	4.5831e-07	4.5686e-07	4.553e-07	4.5608e-07	4.5402e-07	4.5151e-07	4.4951e-07	4.4856e-07	4.4973e-07	4.5564e-07	4.5452e-07	4.5174e-07	4.4806e-07	4.4639e-07	4.4505e-07	4.4672e-07	4.4761e-07	4.4472e-07	4.4889e-07	4.455e-07	4.4037e-07	4.4148e-07	4.4226e-07	4.3736e-07	4.4238e-07	4.4076e-07
2.4398e-07	2.3846e-07	2.34e-07	2.3617e-07	2.3729e-07	2.3183e-07	2.2676e-07	2.3027e-07	2.2776e-07	2.2147e-07	2.3038e-07	2.432e-07	2.4771e-07	2.3439e-07	2.2414e-07	2.1913e-07	2.0637e-07	2.2258e-07	2.1211e-07	2.0626e-07	2.0213e-07	1.9946e-07	1.9405e-07	1.916e-07	1.9545e-07	2.1952e-07	2.2286e-07	1.9366e-07	2.0341e-07	1.9695e-07	1.9428e-07	1.9093e-07	1.9968e-07	2.0046e-07	1.8915e-07	1.7818e-07	1.779e-07	1.7266e-07	1.6982e-07	1.7004e-07	1.6681e-07	1.6291e-07	1.6274e-07	1.6196e-07	1.5879e-07	1.5728e-07	1.5639e-07	1.5539e-07	1.5422e-07	1.5255e-07
6.7259e-07	6.654e-07	6.615e-07	6.5782e-07	6.5621e-07	6.5448e-07	6.5626e-07	6.547e-07	6.5164e-07	6.4763e-07	6.4752e-07	6.5437e-07	6.5743e-07	6.5922e-07	6.6039e-07	6.5404e-07	6.4529e-07	6.3821e-07	6.3571e-07	6.332e-07	6.4022e-07	6.4501e-07	6.4362e-07	6.5716e-07	6.7376e-07	6.5409e-07	6.5894e-07	6.576e-07	6.4963e-07	6.4005e-07	6.488e-07	6.5103e-07	6.4713e-07	6.5392e-07	6.5197e-07	6.2278e-07	6.2038e-07	6.2089e-07	6.1342e-07	6.1615e-07	5.9932e-07	5.9147e-07	5.8244e-07	5.8183e-07	5.7498e-07	5.6617e-07	5.6389e-07	5.6255e-07	5.6066e-07	5.5982e-07
2.5088e-07	2.4386e-07	2.3734e-07	2.364e-07	2.3757e-07	2.3356e-07	2.2392e-07	2.1991e-07	2.1489e-07	2.1032e-07	2.0748e-07	2.0497e-07	2.0213e-07	2.0102e-07	2.0258e-07	1.9818e-07	2.0169e-07	2.0202e-07	1.9857e-07	2.0052e-07	2.0731e-07	2.0926e-07	2.0926e-07	2.3066e-07	2.2949e-07	2.2247e-07	2.2364e-07	2.2046e-07	2.0882e-07	1.9378e-07	2.033e-07	2.1623e-07	2.0564e-07	2.0063e-07	1.8726e-07	1.7762e-07	1.8932e-07	1.8765e-07	1.7884e-07	1.7272e-07	1.6948e-07	1.6837e-07	1.6592e-07	1.6781e-07	1.7767e-07	1.8079e-07	1.7673e-07	1.6809e-07	1.6269e-07	1.5907e-07
2.5211e-07	2.4971e-07	2.4983e-07	2.4715e-07	2.4398e-07	2.359e-07	2.3188e-07	2.267e-07	2.218e-07	2.1874e-07	2.1489e-07	2.1183e-07	2.0899e-07	2.0876e-07	2.0464e-07	2.0319e-07	2.0999e-07	2.1294e-07	2.1383e-07	2.1333e-07	2.0626e-07	2.0341e-07	2.0731e-07	2.3417e-07	2.2553e-07	2.3099e-07	2.3272e-07	2.2057e-07	2.0091e-07	2.0241e-07	2.0436e-07	2.1918e-07	2.1322e-07	2.1016e-07	2.0631e-07	1.994e-07	1.9428e-07	1.9567e-07	1.8954e-07	1.8698e-07	1.8592e-07	1.7996e-07	1.7734e-07	1.9545e-07	2.1796e-07	1.9946e-07	1.9283e-07	1.828e-07	1.7684e-07	1.7227e-07
2.4565e-07	2.4336e-07	2.4225e-07	2.3573e-07	2.3099e-07	2.3005e-07	2.2743e-07	2.311e-07	2.3149e-07	2.2648e-07	2.2252e-07	2.2174e-07	2.2447e-07	2.1768e-07	2.1662e-07	2.2759e-07	2.432e-07	2.4899e-07	2.155e-07	2.1784e-07	2.1901e-07	2.1361e-07	2.0943e-07	2.2598e-07	2.2202e-07	2.2225e-07	2.2626e-07	2.2085e-07	1.9723e-07	1.9634e-07	2.0275e-07	1.9734e-07	1.9723e-07	1.9261e-07	1.8737e-07	1.8469e-07	1.8336e-07	1.8135e-07	1.7706e-07	1.7467e-07	1.7389e-07	1.7606e-07	1.8358e-07	2.1723e-07	2.0759e-07	2.1344e-07	2.1417e-07	2.0843e-07	1.8575e-07	1.7077e-07
2.4815e-07	2.432e-07	2.3918e-07	2.3534e-07	2.3439e-07	2.3133e-07	2.3339e-07	2.3773e-07	2.3734e-07	2.301e-07	2.2704e-07	2.257e-07	2.2949e-07	2.242e-07	2.1896e-07	2.3194e-07	2.5283e-07	2.325e-07	2.2314e-07	2.1929e-07	2.1651e-07	2.0603e-07	2.0854e-07	2.1361e-07	2.2397e-07	2.2927e-07	2.3021e-07	2.2403e-07	2.1261e-07	2.0353e-07	1.9846e-07	1.9322e-07	1.882e-07	1.9015e-07	1.8325e-07	1.8191e-07	1.8085e-07	1.7946e-07	1.7912e-07	1.7662e-07	1.7439e-07	1.711e-07	1.9171e-07	2.2592e-07	2.125e-07	2.1812e-07	2.189e-07	2.1344e-07	1.8843e-07	1.7829e-07
2.4815e-07	2.4386e-07	2.364e-07	2.3177e-07	2.3172e-07	2.2693e-07	2.2553e-07	2.2275e-07	2.2035e-07	2.1784e-07	2.1673e-07	2.1484e-07	2.247e-07	2.194e-07	2.1445e-07	2.2186e-07	2.476e-07	2.3556e-07	2.3473e-07	2.1846e-07	2.1706e-07	2.1584e-07	2.2598e-07	2.2096e-07	2.1227e-07	2.0587e-07	2.0319e-07	2.023e-07	1.9561e-07	1.9294e-07	1.9227e-07	1.9522e-07	1.9561e-07	1.9651e-07	1.9082e-07	1.8414e-07	1.8598e-07	1.8347e-07	1.7712e-07	1.8152e-07	1.8397e-07	1.8157e-07	1.9606e-07	2.286e-07	2.1511e-07	2.1762e-07	2.1133e-07	2.0408e-07	1.9623e-07	1.93e-07
2.52e-07	2.4693e-07	2.4359e-07	2.4492e-07	2.4147e-07	2.3344e-07	2.2832e-07	2.2748e-07	2.2135e-07	2.2069e-07	2.1773e-07	2.1439e-07	2.1283e-07	2.2046e-07	2.2108e-07	2.1712e-07	2.281e-07	2.393e-07	2.393e-07	2.3445e-07	2.2954e-07	2.2124e-07	2.1667e-07	2.1322e-07	2.0692e-07	2.0018e-07	1.9461e-07	1.9311e-07	1.8954e-07	1.8659e-07	1.8765e-07	1.8464e-07	1.8196e-07	1.7996e-07	1.7773e-07	1.7979e-07	1.8102e-07	1.872e-07	1.9121e-07	1.9032e-07	1.8787e-07	1.8503e-07	1.9422e-07	2.2269e-07	2.0525e-07	2.0336e-07	2.0392e-07	2.0018e-07	1.93e-07	1.7533e-07
2.5183e-07	2.4687e-07	2.4331e-07	2.4308e-07	2.3645e-07	2.3255e-07	2.3049e-07	2.2431e-07	2.2141e-07	2.1913e-07	2.1924e-07	2.1796e-07	2.1439e-07	2.1027e-07	2.0743e-07	2.0542e-07	2.0447e-07	2.0904e-07	2.0559e-07	2.0224e-07	2.0447e-07	2.0124e-07	2.0314e-07	2.047e-07	1.9628e-07	1.9511e-07	1.9339e-07	1.9205e-07	1.95e-07	1.9121e-07	2.0002e-07	1.9288e-07	1.9417e-07	1.9957e-07	2.038e-07	2.1556e-07	2.2057e-07	2.0726e-07	2.0865e-07	2.0865e-07	2.0492e-07	1.9667e-07	1.8625e-07	1.9567e-07	2.0107e-07	2.0146e-07	1.8313e-07	1.7884e-07	1.8915e-07	1.8107e-07
2.4269e-07	2.3801e-07	2.3333e-07	2.2915e-07	2.2531e-07	2.2286e-07	2.2035e-07	2.1662e-07	2.1461e-07	2.1238e-07	2.0965e-07	2.0776e-07	2.0548e-07	2.0297e-07	2.013e-07	2.0308e-07	1.9823e-07	1.9712e-07	1.9389e-07	1.9333e-07	1.9088e-07	1.9105e-07	1.8748e-07	1.8648e-07	1.8832e-07	1.8536e-07	1.8486e-07	1.8492e-07	1.8932e-07	1.8575e-07	1.8687e-07	1.8575e-07	1.9695e-07	2.0982e-07	2.1556e-07	2.1679e-07	2.1339e-07	2.1623e-07	2.1784e-07	2.169e-07	2.1311e-07	1.9807e-07	1.9043e-07	1.9132e-07	1.8235e-07	1.7166e-07	1.8274e-07	1.7974e-07	1.852e-07	1.7483e-07
2.4827e-07	2.4347e-07	2.393e-07	2.3852e-07	2.3656e-07	2.3105e-07	2.2626e-07	2.2314e-07	2.1835e-07	2.1645e-07	2.1266e-07	2.1333e-07	2.091e-07	2.062e-07	2.0341e-07	2.0163e-07	1.9951e-07	1.9829e-07	1.9762e-07	1.9773e-07	1.9756e-07	1.9506e-07	1.9695e-07	2.0626e-07	2.0704e-07	2.0219e-07	1.9706e-07	1.9517e-07	1.9628e-07	1.9121e-07	1.8542e-07	1.8436e-07	2.0024e-07	2.1467e-07	2.2052e-07	2.1305e-07	2.155e-07	2.1768e-07	2.0921e-07	2.0291e-07	2.018e-07	1.989e-07	1.7818e-07	1.8787e-07	1.828e-07	1.7901e-07	1.76e-07	1.7405e-07	1.6915e-07	1.706e-07
# Channel: Phase
# Width: 75.0 µm
# Height: 52.4 µm
# Value units: deg
-1.5397	-1.3593	-1.3189	-1.4734	-1.3209	-1.5387	-1.3344	-0.38985	1.83	3.4734	0.13894	1.9285	4.7643	3.5823	0.62936	1.8062	6.1941	-1.4163	-1.5542	-1.2567	-1.2328	-1.6589	-1.5967	-1.3541	-1.1571	1.8321	1.378	1.4402	2.6149	4.053	-1.6869	1.6507	2.336	1.744	0.788	-2.1369	-0.30691	-2.2551	-1.8051	1.3043	3.1738	0.094353	-1.7243	-1.6019	-2.4459	-3.5595	-1.717	0.35149	3.545	0.81081
-4.4491	-4.4781	-4.6243	-4.7404	-4.5662	-4.3029	-2.1235	-1.3666	-1.5573	-1.0203	0.11198	-0.99433	-1.6766	-1.3946	-1.2608	-1.182	-1.5874	-1.4485	-1.4962	-1.1509	0.12131	-1.0597	-1.6475	-1.4651	-1.6911	-1.2504	-0.32038	1.7243	0.62729	2.1369	0.8782	3.3272	2.6533	-2.6668	0.69572	1.2131	0.52568	-1.6247	2.6357	-3.9359	0.013479	0.070505	-1.9202	-1.2183	-2.6367	-1.6403	-2.3526	0.81703	1.1623	-1.406
-1.9493	-1.549	-1.8466	-1.8829	-1.8508	-1.069	-1.5594	-1.7989	-1.9244	-1.8456	-0.94042	-1.6465	-1.7657	-1.3002	-1.5594	-0.75275	-1.4153	-0.15345	-1.6652	-1.2836	-0.83777	-0.95078	-2.0198	-1.9036	-1.7699	-2.1079	-2.0218	-1.9762	-1.8756	-1.5739	1.294	2.6885	-0.21774	3.7077	2.3308	1.1374	0.96426	0.82325	0.31105	-2.1743	-1.7523	-0.73201	-2.0654	-1.9099	1.211	-1.1861	0.097463	1.8559	0.20218	-1.6434
-2.2334	-2.1214	-2.3391	-2.2365	-2.1214	-2.5703	-2.0685	-2.5859	-2.5869	-2.7974	-2.6771	-2.7217	-2.7528	-2.8285	-3.4444	-3.4838	-3.3065	-3.7554	-3.8602	-4.0675	-4.3433	-5.7752	-6.3195	-6.9686	-7.7805	-1.9254	-1.9959	-1.4889	-1.802	-1.688	-1.1457	1.0389	3.4465	0.68224	1.3925	3.3417	2.618	1.549	0.74342	0.28409	-0.36393	0.28202	-4.5735	-0.8668	0.44895	-2.5361	-0.77141	2.0695	-0.6221	0.24055
-1.9192	-2.2468	-2.3847	-2.3256	-2.3516	-2.1514	-2.4438	-2.505	-2.2779	-2.2437	-2.2147	-2.3194	-2.2437	-2.2064	-2.2292	-2.0571	-2.3858	-1.5812	-2.2385	-2.1193	-1.999	-2.0218	-1.7212	-1.4775	-1.7481	-1.8362	-1.3572	-0.75897	-1.0348	-1.8217	-1.1198	-1.8041	-1.7149	-0.15864	3.2702	-0.10783	3.1665	2.7062	2.2085	1.6413	0.89687	-0.24884	-0.70298	-0.19078	-3.179	-3.1199	-3.8788	-1.1146	-1.3759	-1.2204
-1.9648	-2.4677	-2.4501	-2.335	-2.4625	-2.0903	-2.5278	-2.4221	-2.4418	-2.3526	-2.4469	-2.2717	-2.3443	-2.4604	-2.4729	-2.3723	-2.2489	-2.2479	-2.0592	-2.1732	-2.0861	-2.0488	-1.9721	-1.8663	-1.8508	-2.1317	-0.74653	-1.1094	-2.0861	-1.8228	-2.0322	-2.025	-1.8974	-1.8238	-1.38	-1.6061	2.6346	1.2774	2.4573	0.052879	0	-0.066358	0.53916	0.15345	-0.78074	-0.35875	1.0866	-1.3738	-4.1131	-2.4055
-2.3308	-2.2748	-2.5662	-2.2137	-2.3816	-2.4573	-2.5869	-2.5828	-2.4241	-2.2935	-2.3215	-2.5403	-2.0955	-2.3661	-2.364	-2.5963	-1.9493	-2.1722	-2.0115	-1.8891	-2.3754	-2.0934	-1.2732	-2.6118	-2.0447	-2.4407	-2.3319	-2.8192	-2.8731	-2.9529	-2.8721	-3.0182	-2.871	-2.0675	-1.547	-1.8912	0.21359	-0.67084	0.48628	0.79526	1.9399	2.337	1.8394	1.4619	0.76623	0.83051	0.89272	-2.2603	-2.2551	-0.68017
-2.0716	-1.8995	-1.8953	-2.2696	-2.0509	-2.0084	-2.1597	-1.4329	-2.1514	-2.4345	-2.1141	-2.6263	-2.1276	-1.7222	-2.0778	-1.9296	-2.9115	0.28098	-2.2759	-2.1432	-2.7424	-1.2826	-1.9182	-2.2126	-1.8674	-2.0281	-2.224	-1.9088	-1.7015	-1.5812	-1.7367	-1.773	-1.7191	-1.4889	-1.7326	-1.379	-0.16589	-0.13064	-1.1841	-0.83362	3.8965	-0.73408	2.6968	1.9544	1.4205	1.1094	0.96841	0.47073	0.40333	-1.1042
-1.971	-2.2748	-2.1743	-2.3484	-2.3163	-2.309	-1.9607	-2.2095	-1.4246	-2.0872	-1.9949	-2.0654	-1.9918	-2.0042	-1.7823	-1.9534	-1.3012	-1.3894	-1.8383	-1.9379	-2.5797	-1.5034	-1.436	-1.7937	-1.9679	-1.9358	-2.3681	-1.6465	-1.8155	-1.9596	-2.1473	-1.4972	-1.828	-1.8477	-1.9638	-2.0094	-2.0509	-0.72579	-1.6579	-1.2639	0.094353	0.788	0.12753	3.4962	2.7756	2.0001	1.4205	1.1063	0.6024	0.41474
-2.7663	-2.8689	-2.9	-2.8959	-3.2235	-3.2194	-2.9892	-3.4247	-4.024	-4.9644	-5.4248	-5.5658	-5.8571	-6.0811	-6.7799	-5.0453	-1.7087	-2.5475	-2.2354	-2.0965	-2.5226	-1.6258	-2.0913	-1.8342	-1.9856	-2.7839	-1.266	-2.4449	-1.9182	-2.4718	-1.4537	-2.0561	-1.5376	-2.0529	-2.1494	-1.8373	-2.0965	-1.7927	-1.9555	-1.6465	-2.0488	-1.8051	0.82636	-0.7797	1.7222	1.6911	2.7808	2.1235	1.6009	1.2701
-2.8451	-2.7497	-2.5175	-2.4283	-2.6626	-2.6274	-2.4936	-2.6211	-2.5237	-2.4501	-2.3474	-2.3484	-2.1317	-2.3443	-2.0903	-2.1162	-2.0478	-2.252	-2.0395	-2.5102	-1.7502	-1.8394	-2.112	-1.9068	-2.0343	-1.9524	-2.6813	-1.4848	-1.6258	-1.407	-1.5594	-1.8539	-1.9627	-2.5268	-0.53916	-2.1794	-2.2935	-2.2417	-2.2655	-2.3982	-2.1629	-2.2572	-1.5573	-1.6849	-1.8342	0.55264	-0.15553	1.0037	0.51946	2.5651
-2.6025	-2.8721	-2.5133	-2.2645	-2.477	-2.5797	-2.8306	-2.5817	-2.3329	-2.4874	-2.6916	-1.548	-0.80148	-2.1235	-2.4978	-1.942	-2.1432	-2.2707	-2.5537	-2.3381	-2.562	-2.4252	-2.1981	-2.0758	-2.1048	-1.9648	-2.785	-1.7937	-1.9275	-1.5687	-1.3655	-2.3671	-2.4252	-2.2945	-2.1421	-2.3049	-2.0509	-2.1608	-2.083	-2.2842	-2.0872	-2.223	-2.139	-0.67913	-1.8549	-1.7377	-2.1017	-1.323	-0.29343	2.1981
-2.1556	-2.7559	-2.4221	-1.9773	-2.3277	-2.1908	-2.3847	-2.3775	-2.3972	-2.4449	-2.0447	-2.1172	-2.2095	-2.3008	-2.3319	-2.5807	-1.7792	-2.448	-2.674	-2.5569	-2.3733	-2.4024	-2.1038	-2.308	-2.224	-2.4034	-2.2976	-2.5019	-2.9332	-1.9047	-2.3785	-1.7284	-2.419	-2.2489	-2.3764	-2.4905	-2.4003	-2.5226	-2.5589	-2.2935	-2.4594	-2.4003	-2.5112	-2.4822	-2.532	-2.1732	-2.2738	-2.2738	-2.0965	-0.80148
-2.5859	-0.94456	-1.8549	-2.4957	-2.4884	-2.4978	-2.4822	-2.4086	-2.6979	-2.5755	-2.6263	-2.5278	-2.5486	-2.6315	-2.5921	-2.6719	-2.6045	-2.3993	-2.3816	-2.4843	-2.5651	-2.8866	-1.6579	-2.4221	-2.3464	-2.4905	-2.6999	-2.2064	-2.3339	-2.4034	-2.2696	-2.2126	-2.1898	-2.2147	-2.222	-2.6211	-0.89687	-2.42	-2.4915	-2.1691	-2.3681	-1.6351	-2.1908	-2.365	-2.2292	-2.2686	-2.2417	-2.4625	-2.2686	-2.138
-2.7414	-2.9156	-2.7456	-2.5413	-2.4127	-2.4272	-2.4781	-2.3308	-2.5237	-2.3982	-2.4407	-2.5216	-2.5693	-2.449	-2.365	-2.5123	-2.2271	-2.5413	-1.8808	-2.4604	-2.8544	-2.9706	-2.0934	-2.5392	-2.562	-2.4698	-2.2925	-2.2707	-2.3049	-2.3609	-2.1805	-2.2417	-2.0923	-2.3215	-2.3796	-2.4853	-1.2224	-2.0747	-2.6201	-1.7336	-2.616	-2.252	-2.3796	-2.5641	-2.1836	-2.5662	-1.9161	-2.2883	-2.4708	-2.757
-2.7321	-2.5786	-2.3961	-2.3754	-2.4034	-2.8876	-2.0177	-2.3153	-2.5112	-2.3754	-2.8347	-2.4822	-1.3707	-2.4428	-2.5454	-2.3536	-2.2728	-2.674	-2.4335	-2.4324	-2.4718	-2.363	-2.421	-3.1779	-3.0245	-0.89687	-2.6066	-2.4127	-2.4822	-2.3298	-2.3246	-2.645	-2.3847	-2.6305	-2.7818	-2.7062	-2.026	-2.1971	-2.2562	-2.1504	-2.3101	-2.1877	-2.1639	-2.025	-2.6854	-1.7191	-1.1654	-2.4822	-2.4283	-2.6077
-2.5734	-2.2178	-2.3868	-2.3961	-1.9513	-2.307	-1.8497	-2.0778	-1.9835	-2.1131	-2.2437	-2.1898	-0.56197	-2.0737	-2.2634	-2.391	-2.3184	-2.5714	-1.7792	-1.6558	-2.5413	-2.3474	-2.4252	-2.8275	-2.59	-2.5216	-2.5527	-2.2686	-2.5247	-2.5289	-2.3982	-2.1328	-2.3308	-2.3018	-2.6294	-2.5786	-2.0747	-2.2728	-2.5071	-2.2831	-2.2157	-2.3567	-2.6844	-2.3723	-2.5548	-1.8165	-2.5071	-2.7746	-2.4241	-2.5983
-3.0317	-2.6948	-3.011	-2.3008	-2.5797	-2.5662	-2.8482	-2.4563	-2.9706	-2.6004	-2.8762	-2.8835	-2.5734	-2.6927	-2.6668	-2.5413	-2.6574	-2.7487	-2.4781	-2.759	-2.5952	-2.3329	-2.4542	-2.3785	-2.6491	-2.2375	-2.5029	-2.5361	-2.5268	-2.5963	-2.6077	-2.4584	-2.4998	-2.4708	-2.6948	-2.5475	-2.4708	-2.4335	-2.5506	-2.4687	-2.4863	-2.7207	-2.7165	-2.5195	-2.4874	-2.7352	-2.5112	-2.3474	-2.6315	-2.5745
-2.1867	-2.2074	-1.9555	-1.6351	-1.6081	-1.9088	-1.9379	-1.9576	-1.549	-2.0892	-2.4252	-2.9861	-2.8503	-2.7082	-2.8295	-2.8088	-2.6481	-2.7393	-2.6989	-2.7082	-2.759	-2.5434	-2.6211	-2.4791	-2.59	-2.5693	-2.7487	-2.7767	-2.731	-2.787	-2.6367	-2.7176	-2.7051	-2.7062	-2.674	-2.8451	-2.6761	-2.5838	-2.6585	-2.5475	-2.6968	-2.6398	-2.6294	-2.6636	-2.5133	-2.7259	-2.843	-2.758	-2.8171	-2.7933
-1.8777	-0.87095	-2.0281	-1.9907	-1.8684	-1.8725	-2.5133	-1.9482	-1.153	-2.5382	-2.5911	-2.4241	-2.2769	-2.2292	-2.6087	-2.2914	-3.1489	-2.0737	-2.1463	-2.7891	-2.4998	-2.4677	-2.4304	-2.5382	-2.3993	-2.4884	-2.4428	-2.4791	-2.4884	-2.3816	-2.3744	-2.307	-2.251	-2.2904	-2.3484	-2.8161	-1.1364	-1.772	-2.3806	-2.6782	-2.7362	-2.7124	-2.8451	-2.5942	-2.532	-2.6118	-2.5828	-2.8316	-2.4698	-2.7476
-1.7367	-1.6061	-3.0898	-1.9783	-3.2215	-1.7668	-2.3941	-2.8015	-2.4781	-2.1929	-1.9088	-1.998	-1.8311	-2.365	-1.7585	-1.4028	-2.3516	-1.4132	-1.0762	-1.2338	-1.8114	-1.7056	-1.8902	-2.4293	-2.2582	-2.1732	-1.9358	0.88546	-0.79837	-2.4822	-2.3484	-2.6191	-2.3505	-2.3028	-2.562	-2.3433	-2.6761	-2.6585	-2.6346	-2.6242	-2.785	-2.4065	-2.4926	-2.5817	-2.5496	-2.4459	-2.6948	-2.3661	-2.3557	-2.6367
-2.0187	-2.025	-2.3661	-2.2137	-2.8358	-1.5594	-2.3837	-2.2199	-2.1172	-2.0301	-2.0312	-2.112	-2.0001	-2.1463	-2.1888	-1.1156	1.6227	-1.604	0.33594	2.9405	-1.8705	0.47798	-1.0078	-2.3298	-1.9493	-1.9057	-2.2147	-1.5511	-2.2966	-2.5776	-2.5403	-2.6045	-2.5724	-2.617	-2.5195	-2.6522	-2.3733	-2.4615	-2.3692	-2.7051	-2.6025	-2.4853	-3.1561	-1.4702	-2.4957	-2.5434	-3.0504	-2.4884	-2.0633	-2.5755
-2.1898	-2.309	-2.307	-2.1245	-2.8451	-1.8321	-2.0944	-2.0986	-2.1131	-2.0094	-2.0789	-2.1877	-2.0478	-1.8238	-1.9161	-2.279	-2.2779	-1.4816	-1.5024	-1.1219	-0.90516	0.68017	-1.407	-2.7207	-2.4781	-2.7041	-2.6139	-2.6377	-2.6408	-2.5683	-2.5776	-2.6242	-2.4615	-2.4698	-2.6035	-2.6512	-2.4542	-2.4438	-2.2531	-2.4024	-2.5766	-2.3661	-3.3936	-1.3209	-2.6761	-2.562	-2.7715	-2.9643	-2.982	-2.9446
-2.5683	-2.421	-2.364	-2.3785	-2.4013	-2.3505	-2.393	-2.251	-2.4438	-2.8047	-1.4848	-2.1203	-2.0467	-2.0426	-2.0021	-2.4542	-2.3889	-2.0654	-1.2069	-1.4879	-1.5584	-1.0348	-2.3153	-2.8295	-2.6989	-2.5351	-2.8358	-2.7373	-2.588	-2.7124	-2.5838	-2.7798	-2.7673	-2.8783	-2.6315	-2.6554	-2.8731	-2.3661	-2.7787	-2.252	-2.5724	-2.4107	-2.5828	-2.6191	-2.6668	-2.6398	-2.6989	-2.56	-2.5714	-2.7922
-1.8663	-1.576	-1.7087	-1.5511	-1.4557	-1.4816	-1.576	-1.5242	-1.9016	-2.1442	0.067395	-1.8632	-1.886	-1.6351	-1.7564	-1.9907	-1.2452	-1.8477	-1.6921	-1.3334	-1.0317	-0.5827	-1.1986	-1.7543	-1.7367	-1.7315	-1.7077	-1.9586	-1.913	-1.8186	-1.8083	-2.0789	-2.28	-1.7917	-2.027	-2.1432	-2.0561	-1.969	-2.083	-2.3122	-2.2883	-2.1929	-2.111	-2.3319	-2.2178	-2.1587	-2.055	-2.8358	-1.5407	-2.168
-1.6589	-2.2696	-2.1255	-2.0187	-2.1027	-2.2489	-2.1618	-2.2074	-1.997	-2.5143	-1.9741	-2.2852	-1.9783	-2.4324	-1.772	-1.9596	-1.9493	-1.915	-1.7377	-2.3319	-2.2614	-1.5978	-1.1727	-1.8829	-1.8311	-1.7906	-1.8632	-1.941	-1.8	-1.6766	-1.6693	-1.8383	-2.4355	-1.7056	-0.37741	-1.7792	-2.025	-2.1743	-2.2023	-2.6916	-2.3993	-0.94145	-2.4366	-2.3972	-2.5403	-2.8212	-2.4024	-2.3132	-1.9949	-2.7404
-1.6465	-1.7305	-1.2556	-1.4547	-1.5625	-1.4537	-1.6558	-1.9534	-1.9814	-1.9109	-1.9949	-1.8477	-1.8456	-1.943	-1.9296	-1.9202	-1.858	-1.8559	-1.8186	-1.7948	-2.1888	-1.4568	-1.5615	-1.6009	-2.1597	-1.2846	-1.7771	-1.66	-1.7595	-1.7585	-1.7212	-1.689	-1.9887	-1.7761	-1.7108	-1.7367	-1.5065	-1.4391	-1.7502	-1.4744	-1.7554	-1.125	-1.689	-1.5573	-1.8445	-1.6589	-1.4371	-1.6911	-1.6621	-1.5916
-0.75067	-1.0617	-0.82636	-0.027995	-0.5039	-0.52464	-0.23433	-0.023847	-0.68432	-1.6869	-0.28513	-0.19493	-0.83362	-0.48524	-0.90931	0.42614	-0.39504	-1.042	-0.68017	-0.8077	-0.73408	-0.6615	-0.81081	-0.68017	-0.57959	-0.64284	-0.54538	-0.70298	-0.65217	-0.60033	-0.82118	-0.44584	-0.56197	-0.68743	-0.55367	-0.44999	-0.92072	-0.1773	-0.30794	-0.32246	-0.34216	-0.45621	-0.19285	-0.43651	-0.84399	-0.37534	0.50494	0.33075	-0.61174	-0.82429
-1.6444	-1.6507	-2.3028	-2.0726	-1.7554	-1.2152	-1.2079	-0.57752	-1.8943	-1.9337	-1.2888	-1.3064	-2.0519	-2.4314	0.67291	-1.4225	-0.44895	-0.52464	-2.2914	-2.1463	-2.1286	-2.1483	-2.1473	-2.0384	-2.0332	-1.9793	-2.167	-2.1815	-2.0737	-2.0602	-1.9928	-2.0872	-1.9835	-1.9358	-2.1255	-1.9679	-2.279	-1.9472	-2.393	-1.7326	-1.577	-1.8228	-1.6507	-1.6766	-1.7595	-2.4532	-1.7232	-0.84503	-1.774	-2.5257
-1.9752	-1.9876	-1.8839	-1.6901	-0.88028	-0.72475	-1.3583	-1.1395	-0.93108	-2.0312	-1.3676	-1.5853	-1.4848	-1.3126	-1.7803	-0.68328	-1.0908	-0.71542	-1.801	-2.5714	-2.5444	-2.5569	-2.4335	-2.4407	-2.7186	-2.3847	-2.3692	-2.3101	-2.4262	-2.2759	-2.3153	-2.2914	-2.0156	-2.6865	-2.3142	-2.3806	-2.2883	-2.3422	-2.2437	-2.5009	-2.4055	-2.1784	-2.1981	-2.6118	-2.2064	-2.2624	-2.4272	-2.0115	-2.5973	-2.5651
-1.5729	-2.025	-1.9513	-2.1255	-2.7632	-1.2701	-2.5921	-2.5112	-2.0395	-2.6865	-2.7176	-2.6419	-2.5983	-2.5558	-2.9021	-2.4646	-2.5257	-2.5983	-2.5548	-2.3858	-2.3287	-2.336	-2.2209	-2.3899	-2.2209	-2.279	-2.1432	-2.9156	-1.6776	-2.4345	-2.4656	-2.4552	-2.336	-2.9156	-2.2831	-1.9897	-2.8835	-2.8845	-3.2505	-2.3619	-2.731	-2.7787	-2.6802	-2.7725	-2.7787	-2.5403	-2.8772	-2.8555	-2.6979	-2.6077
-0.85539	-1.2981	-1.2639	-1.127	-1.1633	-1.2442	-1.2452	-1.3126	-1.1976	-1.2235	-2.222	-0.22603	-0.58685	-1.1727	-1.3054	-1.5625	-1.4205	-1.2235	-1.3593	-1.0638	-1.0866	-0.99122	-0.97567	-1.098	-0.78282	-0.86058	-0.90827	-1.324	-1.2266	0.010368	-1.1509	-1.2732	-1.3624	-1.3634	-1.6164	-1.6672	-1.1053	-0.4137	0.0010368	-1.1302	-1.521	-1.407	-1.5501	-1.3562	-1.2971	-2.1546	-0.81807	-1.2867	-1.351	-1.4308
-1.3344	-1.6983	-1.2266	-0.63455	-1.5366	-1.633	-1.4754	-1.577	-1.4412	-1.7087	-1.3583	-1.5646	-1.5604	-1.5034	-1.4526	-1.3323	-1.5812	-2.0986	-0.8388	-1.2577	-1.3437	-1.3448	-1.4277	-1.1291	-1.2598	-1.3427	-1.2587	-1.238	-2.2603	-1.2017	-1.3531	-1.3075	-0.27373	-0.99952	-1.4557	-1.0234	-0.16175	-1.2587	-0.54019	0.10057	-1.3738	-1.2598	-1.2525	-1.2038	-1.3614	-1.4174	-1.2131	-1.2027	-1.3552	-1.1851
-2.3878	-2.6554	-1.744	-1.9949	-2.0042	-2.0602	-1.971	-1.8705	-2.0447	-2.2157	-2.3184	-2.2147	-2.4221	-2.222	-2.1981	-2.194	-2.2251	-2.196	-2.2489	-2.1483	-2.0923	-2.0706	-2.1929	-2.1027	-2.0654	-2.1494	-1.9959	-1.9565	-2.2842	-1.9741	-1.1053	-1.9845	-1.5604	-1.7419	-2.0177	-1.7471	-0.77348	-0.35356	-0.047695	-0.17212	-2.1203	-1.6268	-1.8995	-1.8974	-1.8331	-1.941	-2.0519	-2.8109	0.20841	-2.5029
-1.8124	-1.5366	-2.2458	-2.14	-2.3578	-2.0726	-1.9389	-1.8715	-2.1058	-1.9399	-1.8445	-1.7989	-1.8549	-1.8342	-1.7274	-1.7481	-1.7046	-1.8456	-1.7263	-1.6662	-2.0332	-1.3531	-1.4277	-1.4288	-0.010368	-1.7357	-1.6382	-1.603	-1.604	-1.352	-1.3209	-1.5822	-1.3417	-1.1281	1.0472	-2.2676	-0.28617	-0.20426	-0.16175	0.14931	0.061174	-1.1094	-1.8269	-1.8694	-1.8477	-1.7419	-1.886	-1.8342	-1.9648	-1.7574
-3.0058	-2.7321	-2.6346	-2.6377	-2.7601	-2.4729	-2.8555	-2.5351	-2.8627	-2.3526	-2.0789	-2.421	-2.477	-2.1867	-2.3961	-2.4501	-2.2168	-2.1826	-2.2354	-2.1649	-2.2157	-2.1971	-2.2779	-2.252	-2.112	-2.0913	-2.1753	-2.195	-1.9679	-1.8705	-2.1017	-2.1442	-1.9306	-1.8445	-2.9021	-1.5553	-1.2815	-1.0814	-1.1105	-1.1499	-0.0031105	-2.0913	-2.9073	-2.9032	-2.9322	-2.8669	-2.9197	-3.0172	-2.8918	-2.928
-2.2137	-2.223	-2.5092	-1.9036	-2.2282	-3.0732	-2.0882	-1.7481	-2.1608	-2.1815	-2.2292	-2.1504	-2.1929	-2.1328	-2.0135	-2.1794	-2.7487	-2.3951	-2.0011	-1.4557	-1.9316	-1.8311	-2.0872	-1.6704	-1.7844	-1.7056	-1.8798	-1.5625	-1.7917	-1.6164	-1.604	-1.66	-1.5397	-1.6704	-1.6683	-2.194	-1.406	-0.78696	-0.72683	-0.99226	-1.0451	-1.9337	-1.7253	-2.2893	-1.8238	-1.7948	-1.7295	-1.7139	-2.5724	-1.2712
-0.18559	-0.38156	-0.93212	0.54953	-0.049768	-0.41266	-0.0020737	0.19907	0.091242	-0.23536	-0.18974	-0.15034	-0.046658	0.30276	0.013479	-0.18456	-1.2639	-1.6144	-0.40955	1.6507	0.43858	-0.29446	-0.25921	-0.26854	-0.3743	-0.28202	-0.4448	-0.25403	-0.2167	-0.19493	-0.12235	-0.40644	-0.096426	-0.35564	-0.10679	-0.48939	-0.7683	0.72164	0.047695	-0.36186	-0.41266	-0.30898	-1.5594	1.0586	-0.18559	-0.29861	-0.086058	-0.21359	-0.16797	-1.1737
10.908	10.728	14.202	15.112	14.521	11.922	14.049	13.55	14.574	12.95	15.273	13.525	13.831	14.921	15.03	15.427	10.556	8.7157	8.5716	13.338	16.896	16.83	16.621	14.831	16.789	16.991	16.781	16.283	16.79	16.157	16.727	16.793	16.662	16.378	15.081	15.536	16.681	16.43	16.159	14.692	14.361	14.855	11.256	11.993	14.354	14.156	14.113	14.587	14.746	12.949
-0.6221	-1.0275	-1.0451	-0.87509	-1.3572	-0.80874	-0.67498	-0.76415	-0.77037	-0.6812	-0.71438	-0.65839	-0.51116	-0.67395	-0.73823	-1.8103	-1.2318	-3.4382	2.1245	3.1012	0.20011	-0.41785	-0.6304	-0.4448	-0.61588	-0.56197	-0.53605	-0.9373	-0.62833	-0.011405	-0.83362	-0.76	-0.77245	-0.58167	-0.72268	-0.74549	-0.76	-1.0825	-0.95389	-1.2411	-0.72579	-0.66565	-1.3427	-0.16589	-0.23744	-0.56819	-1.3033	0.2364	-0.33283	-1.4765
1.8031	0.87924	2.1711	1.0472	1.2079	1.7626	2.4646	1.2826	1.3666	1.2556	1.2048	1.4433	1.3873	1.1861	1.5283	1.0545	0.97359	1.2971	1.6278	2.5641	1.9171	1.1996	1.2183	1.2577	1.2629	1.2784	1.0628	1.5729	1.2504	1.3842	0.69676	2.2168	1.3344	1.1633	1.3158	1.3562	0.95389	1.2307	1.3479	1.9586	1.8756	2.1411	2.2385	1.1229	1.0721	1.4454	1.3614	1.4402	1.3759	1.4599
-0.58685	-0.53605	-0.957	-1.436	-0.054953	0.036289	-1.181	-0.89376	-1.0783	-0.64803	-0.26751	-1.0213	-1.239	-0.57234	-0.63144	-0.93938	-1.2815	-0.8979	-0.47591	0.1182	-0.49976	-0.43444	-0.54019	-0.45932	-0.61692	-0.4334	-0.52257	-0.35875	-0.49457	-0.35253	-0.34216	-0.35149	-0.8471	-0.013479	-0.21463	-0.17419	-0.27995	-0.90724	-0.04251	0.43029	0.65736	1.3458	-0.40955	-0.95908	-0.8585	-0.76415	-0.80355	-0.77141	-0.83777	-0.80666
3.8923	3.7731	3.3801	3.8239	4.0126	3.7316	3.7026	3.0836	3.1157	3.5512	3.8996	4.0084	3.6175	3.6632	3.6041	3.6632	3.6155	3.5045	3.5968	3.9286	3.8073	3.7513	3.5657	3.8259	3.6352	3.6041	3.6611	3.3739	3.9856	3.7865	3.6704	3.7026	3.8197	3.7523	3.7762	3.7119	3.9338	3.4278	3.9618	4.0406	4.0665	4.4335	3.7077	3.6352	3.6891	3.6798	3.855	3.6756	3.9162	3.5387
-2.054	-1.8134	-1.6766	-1.7305	-1.7502	-1.4599	-1.6372	-1.1219	-0.93627	1.9762	0.44792	-2.3754	-2.2686	-2.3194	-2.4055	-2.3433	-2.1908	-2.3122	-2.2064	-2.2676	-2.2634	-2.1266	-2.4158	-2.42	-2.5112	-2.5071	-2.2334	-2.3194	-2.42	-2.5226	-2.4573	-2.4615	-2.4843	-2.4086	-2.5029	-2.4594	-2.7269	-2.3982	-2.6274	-2.645	-2.4998	-2.3744	-2.5382	-2.4231	-2.4138	-2.5164	-2.5994	-2.419	-2.6066	-2.4957
-2.7279	-2.5175	-2.5019	-2.6958	-2.7487	-2.5631	-2.3308	-3.4216	-1.5221	-2.4573	-2.6833	-2.4127	-2.7072	-3.0162	-2.2914	-2.6336	-2.6367	-2.646	-2.5672	-2.5195	-2.7974	-3.0566	-3.2723	-2.2292	-2.1618	-2.5247	-2.4656	-2.7611	-2.6491	-3.1385	-2.4781	-3.462	-2.6751	-3.2526	-3.3687	-3.2961	-3.3075	-3.1748	-3.2381	-3.2152	-3.1634	-3.1696	-3.4402	-3.1966	-3.1593	-3.207	-3.1779	-3.179	-3.207	-3.519
-2.3837	-2.4065	-2.4075	-3.1914	-2.083	-2.3723	-3.0245	-2.9073	-2.9633	-2.9643	-3.0587	-2.8503	-2.9664	-2.6274	-3.2764	-2.6865	-2.3505	-3.3065	-2.3495	-2.9633	-2.9011	-2.3744	-2.7321	-2.4615	-2.4978	-2.5734	-2.0281	-2.2893	-2.0872	-2.1711	-1.999	0.025921	-1.07	-1.1478	-1.0057	-0.49872	-2.4055	-3.1976	-3.2235	-3.1178	-3.0825	-2.9737	-3.6362	-2.589	-2.9166	-2.9643	-3.5533	-2.5102	-3.2609	-2.8638
-2.3298	-2.4003	-2.4366	-3.1572	-2.4387	-1.66	-2.8192	-2.7352	-2.5444	-2.6771	-3.2432	-2.6761	-2.7601	-2.6751	-2.7124	-2.6056	-2.5579	-2.5942	-2.4034	-2.5029	-2.5175	-2.307	-2.3028	-2.2292	-2.7113	-2.589	-1.6392	-2.5662	-2.2344	-2.9052	-1.3054	-0.075689	2.336	-0.96841	0.68328	-0.082947	0.15967	-2.9498	-3.2007	-3.2536	-3.1479	-3.1893	-3.5118	-3.1033	-3.0722	-3.125	-3.1676	-3.2225	-2.9602	-3.0877
-1.1644	0.36601	-0.7403	-0.95908	0.022811	0.55678	0.017626	-0.13583	-0.6501	-0.61899	-0.43858	-1.1374	-0.20944	-0.61692	-0.76934	-0.81392	-0.27165	-0.65632	-0.61381	-0.8979	-1.0524	0.37326	-0.55989	-0.45414	-1.5532	0.49561	-0.1576	-0.051842	-0.31313	-1.0752	0.86991	-1.0088	-2.7787	-2.112	2.2365	2.7601	2.8689	-0.52879	-0.81807	-0.65632	-0.58374	-0.62625	-0.68224	-0.54538	-0.79111	-0.83051	-0.83155	-0.81599	-0.957	-0.91657
12.021	12.09	11.687	11.67	12.02	12.047	11.837	11.905	11.541	11.282	11.517	11.363	11.284	11.369	11.648	11.414	11.981	11.628	11.627	11.857	11.916	11.997	11.856	11.389	11.657	11.203	12.141	11.211	11.302	11.419	11.313	10.919	11.011	11.631	11.963	12.239	11.716	10.999	11.289	11.172	11.429	11.616	11.527	11.614	11.541	12.004	11.616	11.648	11.77	11.761
-1.3956	-1.2183	-1.1364	-1.6921	-1.3717	-0.24988	-0.80563	-1.1882	-1.2992	-1.2535	-2.1442	-1.1478	-1.2152	-1.0628	-1.6652	-1.0171	-1.7823	-1.1675	-1.7543	-0.75482	-0.55264	-1.0296	-1.0192	-0.94871	-1.0182	-1.2058	-1.2121	-1.2546	-1.0524	-1.0203	-0.97256	-1.5335	-0.90827	-0.65114	-0.044584	-0.73512	-1.154	-1.1302	-1.0762	-1.6755	-1.3883	-1.1613	-1.6569	-1.4848	-0.70298	-1.2649	-1.3313	-2.0467	-1.04	-0.65321
-1.9244	-1.9389	-1.9182	-2.3557	-2.2437	-1.8217	-1.0545	-1.6486	-1.7979	-1.1094	-2.3298	1.1779	-1.4661	-1.6538	-0.12546	-1.211	-1.828	-1.463	-0.24158	0.92072	-1.1115	-1.7502	-1.7149	-1.6455	-1.575	-1.8995	-1.7574	-2.1183	-1.7512	-1.0057	-1.4215	-1.4526	-2.0198	-1.323	-1.0711	-1.3603	-1.3863	-1.266	-1.3904	-1.9876	-1.1571	-1.3116	-1.4008	0.11094	0.29446	-0.65321	-1.3303	-1.7927	-1.2961	-1.042
-1.717	-1.5449	-1.1747	-1.1436	-1.6766	-1.4443	-1.4039	-1.3282	-1.5407	-1.7968	-2.1006	-0.27787	-0.64699	-1.8228	-1.6755	-1.5615	-1.5128	-2.168	-1.0285	-0.67809	-1.6714	-1.4443	-1.4391	-1.4951	-1.5511	-1.8819	-1.6061	-0.83155	-0.80044	-1.5096	-2.5931	-0.80563	-1.8756	-1.8217	-1.1219	-1.4225	-1.2608	-1.35	-1.1841	-1.1924	-1.2598	-2.3982	-1.7502	-0.070505	0.26232	-0.49872	-1.2764	-1.2452	-1.5345	-1.5656
-1.4028	-1.7004	-1.4101	-1.5242	-1.744	-1.3168	-1.1229	-1.237	-1.4049	-1.6206	-1.2235	-1.3448	-0.73305	-1.2038	-1.2764	-1.6206	-1.5916	-1.491	-1.4671	-1.4931	-1.4308	-1.8051	-1.0099	-1.3375	-1.633	-1.9876	-1.041	0.20633	-0.60966	-1.4402	-1.6745	-1.7792	-1.7533	-1.4132	-1.014	-1.2452	-1.3593	-1.7823	-1.1136	-1.013	-1.6901	-2.3111	-0.41992	0.066358	0.49146	-0.89583	-1.6434	-1.1664	-3.9877	-0.46036
-1.4422	-1.7678	-1.5459	-1.66	-1.5895	-1.5739	-1.7232	-1.6807	-1.7139	-1.6164	-1.6341	-1.7284	-1.7263	-1.7958	-1.5988	-3.7399	-0.6615	0.76104	-0.62522	0.15553	-0.44584	-1.1747	0.14412	-0.26232	-0.026958	-1.0088	-0.24055	-0.62936	-0.69883	-0.44169	-0.17626	-0.28928	0.051842	0.34423	-0.075689	-0.65943	-0.98707	-0.073616	-0.25506	-0.29757	-0.81807	-0.43755	-0.60863	0.37015	0.14101	-0.16589	-0.27684	-0.14619	-0.69987	-0.54953
6.0334	5.8125	5.5347	5.6653	5.6809	5.8115	5.714	4.8617	4.7923	4.953	5.1085	4.9654	5.1127	5.0515	5.0971	2.9094	3.8508	6.1184	5.7845	5.9017	6.3517	6.191	5.3802	5.8322	5.5481	5.5803	5.5461	5.6466	5.7472	5.8395	5.8965	6.0469	6.1028	6.22	6.2273	5.8011	5.6923	5.9338	5.5502	5.6591	5.6311	5.7068	5.7524	5.6694	5.9919	5.6809	5.826	5.7555	5.7876	5.9017
-1.4754	-1.8725	-2.1753	-2.6896	-1.8176	-2.4449	-2.9125	-1.3925	-1.8518	-2.1411	-2.6035	-1.4422	-2.5372	-0.96737	-2.4594	-2.4469	-0.34112	0.1182	-1.8041	-2.0685	-1.5698	-1.4308	-1.8736	-1.9026	-1.9389	-1.828	-1.9845	-1.8839	-1.9513	-1.9793	-1.9534	-1.9462	-2.0405	-1.9866	-1.6278	-1.6123	-2.393	-2.0291	-0.87095	-1.7315	-1.463	-1.604	-1.5314	-1.5822	-2.7331	-2.6554	1.0265	-1.5283	-1.4028	-1.4122
0.31002	-1.6372	-2.3443	-2.5869	-2.7694	-2.7342	-2.7352	-2.7663	-1.941	0.18767	-2.2261	-2.1255	-2.2499	-2.534	-1.8041	-2.6377	-1.9741	-1.8705	-2.3547	-2.251	-2.4252	-2.1432	-2.167	-2.2147	-2.2344	-2.0073	-2.28	-2.0042	-2.0239	-2.1463	-1.9845	-1.9918	-2.5361	-1.6911	-1.4868	-1.9026	-2.1141	-1.9182	-1.7564	-1.8186	-1.8881	-1.7512	-1.9254	-1.8	-2.0405	-1.4257	-1.6714	-2.0156	-1.9835	-1.8808
0.76104	-0.56197	-1.2909	-1.2919	-1.7678	-0.67084	-0.98707	-1.266	-1.6621	-0.29032	-1.4993	-1.9513	-1.1882	-2.2137	-1.5801	-1.6424	-1.8352	-2.0042	-1.3396	-1.9752	-1.8642	-1.7823	-1.915	-2.532	-1.3842	-1.9399	-2.0104	-1.9586	-1.998	-1.8539	-1.8601	-1.9244	-1.9856	-1.858	-1.8528	-1.8902	-1.8611	-2.3205	-1.5522	-1.7948	-1.9275	-1.7637	-1.8528	-1.9773	-1.9648	-1.8995	-1.9617	-1.8767	-1.9358	-2.0104
6.4533	5.1531	4.3361	4.4864	4.3589	4.166	4.9509	4.5268	4.7809	4.7446	4.7156	4.7425	4.0022	4.9986	5.797	4.5434	4.8389	4.8514	4.4086	4.8109	4.5548	4.7238	3.8602	4.6015	5.1718	4.9696	6.361	4.1028	4.1785	4.0976	4.2531	4.1453	3.7409	4.5942	4.3682	4.4688	4.4066	4.1069	4.6357	4.25	4.2355	4.3495	4.3516	4.1826	4.0364	4.6316	4.2407	4.2065	3.9556	6.2615
7.6571	7.7659	7.8644	7.7535	7.7141	7.8665	7.8468	7.5679	7.9267	7.9837	7.9661	8.0832	7.5741	7.6197	8.5633	8.6255	8.5529	8.5166	8.5239	8.3746	8.2989	8.2325	8.0614	7.964	7.7462	8.5747	8.5539	8.4824	8.668	8.4223	8.4845	8.2336	8.2159	8.1765	8.0324	8.218	8.1434	8.189	8.0366	8.1434	8.3124	7.9951	8.2553	8.2626	8.3445	8.0957	7.9412	7.5835	7.4279	8.1226
-1.6672	-2.8409	-2.4874	-2.3267	-2.2945	-2.6201	-2.4117	-2.6522	-2.1971	-2.3298	-2.8907	-2.1452	-2.2696	-2.2676	-2.4801	-2.5693	-2.4003	-2.4283	-2.3661	-3.3117	-2.0218	-1.9907	-2.1038	-2.2064	-2.4573	-2.1255	-1.9949	-1.9223	-2.3733	-2.3008	-1.774	-1.2919	-2.5454	-2.4988	-2.3744	-2.3391	-3.2412	-1.5967	-3.3531	-1.3023	-2.2614	-2.3018	-2.2862	-2.3941	-2.0135	-2.0415	-2.0239	-2.0239	-1.9078	-2.1691
18.962	18.977	18.322	17.766	19.394	19.41	19.324	19.262	19.483	19.175	17.749	18.371	19.164	17.405	17.53	18.971	19.899	19.713	19.444	19.217	18.249	17.724	19.255	17.747	17.804	19.269	18.103	16.674	10.974	11.042	13.557	18.474	19.654	19.097	19.46	19.769	19.285	19.181	19.25	19.412	19.383	19.5	19.482	18.746	17.824	12.66	16.065	17.338	17.768	18.707
-2.1971	-2.0882	-2.7736	-1.3572	-2.6906	-1.7243	-1.9482	-1.9824	-2.3319	-1.718	-2.5838	-1.7388	-1.4018	-1.7761	-1.9088	-1.8694	-2.7134	-1.1955	-1.7243	-1.5138	-2.3847	-0.92175	-1.9773	-1.8829	-1.8725	-1.8933	-1.9596	-1.8072	-1.7917	-1.718	-2.2686	-1.5853	-1.9161	-1.802	-1.6351	-2.0239	-1.4619	-1.7647	-2.2956	-1.3386	-1.2732	-1.7574	-1.5853	-2.534	-0.62625	-2.3381	-0.79629	-1.1374	-1.3717	-1.3458
-0.89168	-0.95597	-0.92694	-0.75689	-0.77452	-1.2567	-0.76623	-0.58789	-0.50702	-0.66669	-0.71438	-0.9653	-0.87302	-0.67706	-0.60655	-0.7092	-0.73201	-0.75171	-0.26128	-0.63869	-0.77141	-0.42096	-0.52672	-0.71438	-0.591	-0.61692	-0.60966	-1.1188	-0.27684	-0.43962	-0.394	-0.42303	-0.54745	-0.35045	-1.2743	0.74238	-0.58167	-0.50287	-0.83362	-0.93316	0.0093316	-0.87509	-0.62833	0.37948	-0.38052	-1.0959	-0.74756	0.25506	-0.3349	-0.57545
-2.4832	-1.7616	-2.027	-1.9233	-1.8943	-1.8425	-1.9513	-2.0457	-1.8622	-1.8684	-1.9192	-1.6237	-1.8746	-1.7906	-1.9731	-1.7315	-1.6704	-1.7564	-1.8176	-1.6092	-1.6351	-1.6807	-1.6154	-1.7129	-1.9337	-1.6683	-1.6766	-1.6538	-1.7917	-1.4298	-1.6289	-1.9731	-1.5262	-1.5656	-1.858	-1.7771	-1.8186	-1.7595	-1.774	-1.8715	-1.9793	-1.9285	-2.1732	-1.7844	-2.1038	-2.4729	-1.9638	-1.9016	-1.7564	-2.2406
12.398	12.492	11.395	15.251	14.244	9.2497	10.741	11.797	11.14	12.317	14.164	15.179	12.174	10.965	10.809	14.777	14.117	13.462	14.005	9.6509	10.578	11.926	11.946	14.374	16.628	10.433	8.4544	9.6323	9.7899	12.657	10.735	9.7131	11.618	11.81	11.531	13.623	14.045	13.944	9.5555	11.322	11.014	10.735	10.891	11.349	12.686	12.968	11.901	9.7992	5.5108	8.5716
9.9682	11.383	10.834	9.259	9.5742	9.0423	9.3077	8.302	8.2128	8.7095	10.823	10.731	9.2663	9.9931	9.5089	9.4363	9.878	10.988	11.325	11.388	8.8329	8.7986	8.7623	8.3798	8.7188	9.457	10.304	9.57	9.4674	9.2663	9.3388	9.371	9.8863	9.1854	10.617	11.325	11.443	11.037	10.498	9.7142	9.5597	9.6333	9.5192	9.6364	11.138	11.238	10.314	9.1709	9.1429	9.2403
0.31002	0.31416	0.73097	-1.6807	-3.2412	-1.8228	-2.9467	-1.7066	-2.1743	-2.3101	-2.4293	-2.4988	-1.6538	-1.7813	-1.9887	-2.11	-2.7072	-1.6507	-0.1379	-1.0379	-2.7984	-2.2748	-2.2873	-2.0084	-2.6792	-2.2302	-1.7471	-2.0094	-1.8041	-1.913	-1.9296	-2.1255	-1.9399	0.38363	-3.2609	-0.63869	-0.38156	-1.3158	-2.0695	-2.1805	-2.8845	-1.8912	-1.7523	-2.025	-2.9135	-1.7585	-1.1737	-2.4801	-2.2002	-2.2344
0.94249	1.5978	1.6278	0.44273	-1.4547	-0.082947	1.2743	-1.0431	-0.51946	-0.60552	-0.62107	-0.57752	-0.86162	-0.58478	-0.78696	-0.65321	-0.45932	-1.2598	0.1773	-0.76104	-0.4251	-0.39504	-0.47073	-0.49872	-0.41785	-0.28409	-0.39815	-1.267	0.34112	-0.28306	-0.2364	-0.60552	-0.24158	-1.0669	-0.37534	1.0887	0.51946	0.26336	-0.44792	-0.39918	-0.25506	-0.29757	-0.27684	-0.33179	-0.39089	-1.7709	-0.66462	1.7886	-0.44169	-0.47798
-1.519	-0.90205	-2.2095	-2.6533	-2.4096	-2.9384	-2.7497	-2.9457	-1.4962	-1.7284	-2.9322	-4.0893	-2.4428	-3.0089	-2.7601	-2.926	-3.097	-3.7274	-3.1893	-2.4936	-2.7196	-2.9757	-2.9436	-3.5273	-2.6222	-2.8565	-2.8824	-2.8907	-2.7715	-2.9477	-2.7321	-2.6916	-2.6823	-2.9934	-2.7113	-2.8223	-2.6585	-2.6564	-2.6408	-2.6284	-2.476	-3.4568	-1.885	-2.4241	-2.3008	-2.6979	-2.9353	-1.6144	-2.561	-2.3671
-0.90516	-0.51013	-0.95597	-0.79837	-0.53294	-0.69883	-0.58167	-0.91968	-1.3189	0.054953	-0.99122	-1.5314	0.14827	-0.31935	-0.79526	-1.5293	-0.25092	-1.5895	-0.40644	-1.3137	-0.20218	-0.99122	-0.90205	-1.1115	-0.6895	-0.78696	-0.85954	-1.0825	-0.92486	-0.23018	-0.80252	-0.94975	-1.0078	-0.94042	-0.98293	-0.85436	-0.82222	-0.69987	-0.84917	-0.66669	-0.74964	-1.0171	-1.1032	-0.46139	-0.80874	-0.54849	-0.50079	-0.81392	-0.36497	-0.62936
17.285	17.262	17.105	17.186	17.24	17.11	17.202	16.998	16.972	17.246	17.201	17.244	17.411	17.14	17.224	17.174	17.11	17.254	17.206	17.192	17.196	17.163	17.239	17.078	17.14	17.09	17.081	14.383	13.151	13.557	13.586	13.851	14.287	14.277	14.076	13.556	13.937	13.527	13.257	14.392	15.586	14.042	15.022	15.814	14.797	15.738	15.636	16.266	15.056	15.328
-2.6543	-2.9581	-2.3267	-2.4822	-2.4584	-2.3028	-2.5776	-2.4832	-2.3298	-2.2354	-2.0519	-2.2479	-2.1038	-2.1069	-2.1826	-2.87	-1.7232	-1.491	-1.8539	-1.7968	-1.801	-1.7689	-1.8414	-1.7139	-1.7637	-1.6247	-1.9057	-1.7015	-2.0509	-2.7964	-1.435	-0.38985	-0.35978	-1.9565	-1.7875	-2.2717	-2.6688	-2.0322	-1.6538	-1.3178	-0.051842	-0.25921	-2.1494	-2.2686	-2.5942	-2.2437	-2.1836	-2.4542	-1.9741	-2.0612
0.39711	-0.029032	0.69157	0.3743	0.29965	0.32349	0.41577	0.43651	0.59515	0.57752	0.46969	0.44688	0.51635	0.50805	0.50909	0.30483	0.43547	0.055989	1.0244	0.54849	-0.11302	0.59618	0.73719	0.64906	0.66462	0.66358	0.26647	1.0482	0.59204	0.030068	0.53708	1.8435	1.4806	0.75378	0.45932	-0.49354	1.3469	0.73408	1.1032	1.66	2.0104	1.8725	1.3655	0.12649	1.0016	0.62107	0.54849	0.66565	0.70609	0.58685
-2.391	-3.0929	-1.5055	-3.1883	-1.5221	-2.1214	-2.6688	-1.6071	-1.8933	-1.5957	-1.7502	-1.8362	-1.6693	-1.8414	-3.2152	-0.15967	-1.885	-2.0644	-1.7637	-1.7616	-2.0291	-2.56	-0.80044	-1.5273	-1.6465	-1.548	-1.8736	-1.9016	-1.0928	-2.4635	-1.2567	-0.33179	-1.1623	-1.7263	-1.5128	-2.3246	-2.9737	-1.5656	-0.16901	0.53501	0.18248	-0.63558	-1.8891	-2.3298	-1.5812	-1.7989	-1.9285	-1.5179	-1.6641	-1.6714
-2.7279	-2.5973	-3.3697	-1.7118	-2.4791	-2.8067	-2.6398	-2.0841	-2.477	-2.5579	-2.3972	-2.6647	-2.4127	-2.2873	-2.8959	-0.6221	-2.5133	-2.4179	-2.5309	-2.7269	-2.2945	-2.4138	-2.5734	-2.4978	-2.3941	-2.1867	-2.2779	-2.7269	-1.6983	-2.1711	-2.4065	-2.5413	-1.9192	-1.8404	-2.5423	-1.6641	-1.6351	-1.3033	-1.181	-1.6237	-2.1307	-1.9524	-1.9099	-1.8674	-1.9202	-2.0198	-1.9088	-1.9068	-1.886	-1.7771
-1.0182	-2.5237	-2.4946	-2.4075	-2.618	-3.1053	-2.252	-2.0084	-2.1442	-2.6916	-2.7227	-2.6471	-2.6253	-2.6491	-2.6004	-2.6948	-2.7176	-2.5755	-2.7145	-2.6242	-2.6087	-2.588	-2.5693	-2.6616	-2.4781	-2.5123	-2.5081	-2.5257	-2.477	-2.4563	-2.4511	-2.4749	-2.4863	-2.5693	-2.5185	-2.5828	-2.5372	-2.3236	-2.3713	-2.4221	-2.2251	-2.2676	-2.2437	-2.1929	-2.702	-2.0654	-1.8964	-2.0177	-2.0654	-2.0332
5.0546	5.347	3.5501	3.5823	3.6061	3.4589	3.8425	3.7233	3.4319	3.5076	3.5584	3.5325	3.4195	3.4952	3.3023	3.5813	3.2868	3.0328	3.5999	3.2308	3.2992	3.2951	3.3604	3.4713	3.4485	3.4392	3.3531	3.3573	3.2308	3.6715	3.2671	3.6196	3.4734	3.2007	4.1111	3.1002	3.2692	3.3345	3.3552	3.6777	3.7378	3.7306	3.7326	3.4931	4.0769	3.8208	3.5885	3.5937	3.5698	3.5605
2.504	-1.2608	1.8155	-2.2157	-2.2282	-2.2209	-2.1971	-2.2645	-2.2344	-2.5983	-2.6242	-1.5428	-2.0519	-2.0011	-1.9244	-2.3816	-1.943	-1.7771	-2.308	-2.4075	-2.4469	-2.3796	-2.224	-2.2116	-2.2645	-2.6989	-2.0084	-1.9596	-1.9472	-2.0053	-1.9275	-1.8756	-2.0498	-2.111	-1.5086	-1.7595	-2.2603	-1.434	-1.688	-1.5594	-2.1763	-2.5092	-1.2328	-0.36601	-2.2873	-2.0654	-2.0198	-2.5206	-1.5553	-1.9078
3.9939	4.0862	4.8213	2.9446	2.4438	2.506	1.9752	2.4438	3.912	2.4915	2.4272	2.9591	2.3236	2.0281	2.0654	2.3588	2.3464	1.7087	2.3008	2.0633	3.2215	3.7503	2.6844	2.1038	2.1131	1.8321	1.7709	2.3412	2.5247	1.746	2.1711	2.1587	1.9824	1.9814	2.1038	2.083	1.5719	2.7539	2.476	1.6071	2.4708	3.0525	3.4713	3.8685	3.294	2.4936	2.504	2.5517	2.4138	2.4044
-1.1747	-0.89894	-0.38363	-1.2193	-2.0332	-1.6061	-2.0685	-2.4345	-0.25506	-1.9472	-2.0996	-1.9773	-1.83	-2.5589	-2.1141	-1.4101	-1.7409	-1.3977	-1.0285	-0.88961	3.0058	-1.4765	0.93005	-0.54953	-2.3277	-2.3319	-2.083	-1.8725	-1.5822	-3.0276	-1.5926	-2.1452	-2.1577	-1.9472	-1.9368	-1.9265	-2.7632	-1.2204	-1.5895	-2.0384	-2.0695	-1.4547	-1.1675	-0.9767	-0.82325	-1.8985	-1.8995	-1.7689	-2.4449	-1.5532
-1.8031	-1.829	-2.2417	-1.8912	-1.4008	-1.6206	-1.8715	-1.8559	-1.5988	-1.8528	-1.8207	-1.7066	-1.6361	-1.7989	-2.6491	-0.29861	-1.4422	-1.9959	-0.7797	-2.1981	-0.60863	0.16589	0.76934	1.153	-1.8487	-1.7834	-1.9223	-1.7471	-1.7398	-1.9659	-1.5055	-1.3147	-1.4806	-1.4982	-2.3008	-1.3272	-1.3085	-1.8041	-1.2338	-1.2452	-2.392	-1.407	-0.23536	0.034216	0.22811	-2.196	-0.94249	-1.4018	-1.3562	-1.519
-1.7471	-1.3251	-1.5045	-1.9721	-1.2971	-0.60655	-1.0026	-1.9513	-1.323	-1.3655	-1.4163	-1.7274	-0.93212	-1.7626	-2.0135	-0.23433	-0.93627	-1.126	-1.4816	-1.774	-0.65425	0.030068	1.1302	0.17937	-1.1716	-1.3344	-1.6403	-1.2297	0.26543	-1.267	-2.2904	-0.51116	-1.7813	-1.7606	-2.4511	-1.6994	-0.93627	-1.8746	-2.1877	-1.5853	-2.2728	-3.8695	-1.0171	0.18974	-1.3707	-1.3168	-1.2214	-1.2961	-1.2836	-1.2162
-1.52	-0.43651	-0.69572	-0.62729	-1.8788	0.20426	-0.69987	-0.33801	-0.73201	-0.51531	-0.64077	-1.1768	-0.37845	-1.3624	-1.3997	2.7704	0.49768	-0.49043	-0.61796	-0.57234	-0.72475	-0.99952	-0.45414	-0.67498	-0.97048	-0.62729	-0.0082947	0.73719	1.7689	2.1629	0.77763	-0.50702	-0.44273	-0.22914	-0.076726	-0.53605	-0.37741	-0.30483	-0.5039	-1.0866	-0.12338	0.24781	0.69987	-0.28306	-0.76726	-1.1965	-0.52257	-1.0565	-0.63455	-1.012
-1.8591	-1.4785	-1.746	-0.39607	-1.295	-1.3531	-1.3158	-1.1053	-0.96115	-1.0254	-1.0099	-1.3593	-1.7803	-0.20011	-2.0218	0.62936	0.5516	-1.2121	-1.1582	-1.0047	-1.1602	-0.96841	-1.4557	-0.97359	-1.7129	-0.9259	-1.8995	0.16175	1.1219	1.4091	0.96634	-1.1685	-1.1198	-1.2909	-1.1302	-1.8725	-0.70298	-0.93834	-1.1499	-1.5439	-0.29032	-0.97256	-1.1519	-1.1768	-1.181	-1.1571	-1.2878	-1.4454	-1.1467	-1.2328
-1.463	-2.1473	-1.3137	-1.7212	-1.2909	-1.3116	-1.9824	-1.1488	-1.9866	-0.98604	-2.0301	-1.6932	-1.8072	-1.605	-1.6527	-1.2328	-1.6133	-1.6859	-2.112	-1.9233	-1.6807	-1.7004	-1.6911	-1.6973	-1.6154	-1.4848	-2.2852	-1.1519	-0.94664	0.16901	-1.3386	-1.4941	-1.3655	-1.4982	-2.1919	-0.7092	-1.5065	-1.4194	-2.055	-1.5179	-0.6895	-1.38	-1.3997	-1.3406	-1.3199	-1.6123	-1.379	-1.7761	-1.3126	-1.2452
-2.0384	-2.1763	-2.1608	-2.1452	-2.0063	-2.1307	-1.997	-2.0841	-1.9638	-2.0965	-1.9493	-2.0571	-1.6548	-2.0104	-2.6595	-0.91035	0.0788	-1.4153	-2.674	-1.9202	-2.758	-2.4304	-2.4532	-2.4428	-2.4324	-2.3163	-2.6792	-2.3039	-1.9119	-3.0773	-1.576	-2.0115	-2.7155	-2.4231	-1.7699	-0.90309	-2.0436	-1.998	-1.9607	-2.0001	-1.9462	-1.7854	-1.6786	-2.309	-1.0607	-1.9679	-0.95804	-0.96219	-1.435	-1.6994
-2.7787	-2.3837	-2.4926	-2.4905	-2.3599	-2.4428	-2.3806	-2.4397	-2.6543	-2.3671	-2.3049	-2.2976	-1.8674	0.51116	-1.2297	1.2266	-1.9213	0.42822	-0.88754	-2.5009	-1.3158	-2.138	-2.1546	-2.4687	-2.2862	-2.1826	-2.1587	-2.1183	-2.2188	-2.2582	-1.8694	-2.082	-2.8513	-1.8777	-2.1919	-0.83051	-1.9928	-2.0706	-2.3878	-2.3225	-2.0436	-2.1546	-1.9109	-1.8165	-2.2562	-1.9202	-2.1649	-1.5843	-0.93108	-1.6735
0.64077	0.4728	0.44999	0.62418	0.59618	0.5236	0.57752	0.60966	0.60552	0.76415	0.68639	0.60033	-0.040437	0.14723	1.0939	1.4422	2.1991	2.9063	1.8176	0.55886	0.84917	0.6615	0.3743	0.48109	1.9659	1.0524	0.70816	0.70713	0.49768	0.64284	0.73719	0.41266	0.26336	1.2919	2.0768	2.8669	1.0441	0.35978	0.48732	0.4728	0.40644	0.35253	0.32764	0.30172	-0.24781	0.98085	0.26025	0.94249	0.50494	0.56508
-0.075689	0.20737	0.21774	0.21048	0.26439	0.10472	0.19182	0.32453	0.33801	0.38571	0.39607	0.29343	-0.28824	0.86265	0.63351	0.9373	1.2007	0.81185	-0.34112	0.19493	0.048732	0.1379	-0.045621	-0.8191	0.98396	2.9436	1.0586	0.37637	0.21877	0.21255	0.27995	0.43858	0.0197	-0.068432	0.80044	1.2608	-0.068432	-0.036289	0.066358	0.13375	0.17108	0.16797	-0.50287	0.48732	0.3349	-0.021774	0.2561	0.11716	0.25092	0.20322
0.42407	0.5516	0.71024	0.69779	0.74445	0.85332	0.6895	0.67498	0.81703	0.6895	0.32038	1.2235	0.68432	1.1333	0.75275	0.80148	0.72683	0.72268	0.42199	1.1219	1.5024	1.1146	1.6786	-0.11198	1.5864	0.18248	3.6746	0.63869	0.73616	0.7797	0.72372	0.75793	0.80148	0.67913	0.73927	0.57545	0.87406	0.76	0.66876	0.6895	0.72475	0.68224	0.8077	0.32868	1.1685	1.0379	0.9767	0.9259	0.9964	1.0254
-0.30691	-0.3743	-0.34734	-0.6698	0.40229	-0.10887	-0.0197	-0.32246	0.26336	0.067395	-0.52568	1.3344	-0.25092	0.36808	-0.088132	0.13272	-0.16693	-0.16175	-0.27062	1.2328	2.4563	1.2826	-0.6418	-0.89583	1.0493	3.4071	3.6103	-0.10368	0.15242	-0.0591	-0.037326	-0.10161	-0.58893	0.56508	-0.15656	0.19285	0.14205	-0.4728	0.046658	1.1084	-0.2758	-0.045621	-0.10161	-0.56404	0.41163	0.067395	0.17004	0.092279	0.04251	0.071542
0.52257	0.6615	1.1167	0.84917	0.78489	0.094353	0.59307	0.7486	0.17937	0.5516	1.3448	2.0001	1.8943	0.67395	-0.35875	2.2956	1.0285	0.69261	0.51013	1.8217	3.2712	1.9741	0.055989	0.60344	2.2396	3.4879	2.5838	0.47591	0.51427	0.41992	0.44584	0.48835	0.10576	0.7206	0.77659	0.8471	0.72268	0.20322	1.5314	1.6558	0.44169	0.38571	0.48317	0.39711	0.4728	0.52983	0.52568	0.071542	0.79007	0.64699
-0.40333	-0.71231	-0.12027	-0.090205	-0.10265	0.78282	0.23536	-0.25714	-0.9062	-0.50909	0.46139	-0.31831	-0.10783	-0.30068	-0.95597	0.57752	-0.10057	-0.16486	-0.76726	0.40333	1.0856	0.26128	-0.6895	-0.53916	0.99122	1.8445	0.0394	-0.52672	-0.56923	-0.46036	-0.74134	-0.40126	-0.42718	-1.1011	0.65736	-1.0752	-0.84606	-0.32764	-0.84814	-0.65114	-0.57545	-0.63144	-0.82429	-0.73719	-0.25195	-0.29965	-0.60863	0.41059	-0.31105	-0.55367
0.89065	0.4531	0.49043	1.0379	0.72994	1.9814	3.0898	3.3334	1.6154	0.08191	0.45206	0.42614	0.28513	0.5039	0.041474	0.26854	1.042	0.85954	0.32038	0.63247	1.521	-0.10991	-0.27891	-2.0789	0.23433	1.8238	0.90309	0.41577	0.41785	0.28721	0.080874	0.45828	0.52879	-0.26439	1.4578	3.4755	0.42096	0.35356	0.44584	0.15967	0.31727	0.37948	0.37637	0.39193	0.14308	0.23329	0.39918	-0.055989	-0.19493	-0.31105
1.941	1.6216	2.027	1.8394	1.4671	1.6144	2.0312	2.8565	2.4241	1.83	1.8922	1.8798	1.8715	1.1747	2.1442	2.0768	2.6357	1.7699	1.9368	1.9244	1.5801	1.8103	1.828	1.4972	2.1203	2.0146	2.0716	1.8394	2.1183	1.9721	1.6693	1.4599	2.1317	2.6605	1.5304	1.969	2.5092	2.3484	2.1991	1.943	2.1038	2.6087	2.3764	2.3267	2.2593	2.3018	2.2686	2.168	2.2448	2.2375
-2.5143	-1.8756	-0.591	-0.24055	-2.027	-2.0467	-2.0623	-2.2717	-2.5309	-1.9057	-1.997	-2.0312	-1.8788	-2.3599	-1.155	-0.54123	-0.30587	-2.0758	-2.1805	-2.196	-2.2375	-2.1266	-2.1048	-2.2873	-2.4262	-1.8031	-1.8259	-2.055	-2.0675	-2.222	-2.0996	-1.969	-0.99744	0	-2.3205	-2.2417	-2.3256	-2.5486	-2.8047	-2.759	-2.7632	-2.7725	-2.5372	-2.7497	-2.6574	-2.6284	-2.5797	-2.6709	-2.702	-2.646
0.034216	-0.1773	-0.37845	2.9726	0.37948	0.16382	0.11094	0.096426	0.16382	0.10783	-0.020737	0.58063	0.20944	-0.29343	0.33075	1.4806	1.1063	0.052879	-0.89479	0.018663	0.18456	-0.27891	-0.17834	-0.14101	-0.12338	-0.25817	-0.21255	-0.51324	0.025921	-0.15242	-0.91449	1.1986	-0.46865	-0.51946	-1.1903	0.18871	-0.046658	-0.54538	-0.6698	-0.58893	-0.57337	-0.67809	-0.7009	-0.81496	-0.83466	-0.68743	-0.91138	-0.57441	-0.55056	-0.71957
0.40644	0.89687	1.7004	3.7046	0.32868	1.0192	0.56819	0.24055	0.86576	0.22396	0.65425	0.56612	0.51013	0.59929	0.36808	0.67187	0.52464	0.32038	0.04251	0.12961	1.3479	0.65425	0.61485	0.52672	0.48939	0.6812	0.30068	0.56612	0.60655	0.25092	0.9373	0.1773	0.87406	0.76623	0.77659	0.86265	0.13479	1.1934	1.1509	1.0265	0.57856	0.95908	2.1058	2.2748	0.76312	0.71335	0.96219	0.60966	0.64388	0.60759
0.29239	1.2888	3.1821	3.2826	1.0959	0.90309	1.097	0.39815	1.5148	1.4868	0.97463	0.87717	0.93108	0.83466	0.91864	1.0679	0.88857	1.012	1.1779	0.31416	1.6704	-0.032142	1.885	2.4086	1.155	1.1986	1.0213	1.0565	0.85228	1.4474	1.0565	1.0876	1.1893	1.2349	1.3375	1.21	1.1602	1.1893	1.098	0.1576	1.5708	2.3993	3.0763	3.49	1.3552	0.62418	1.7108	0.91553	0.093316	1.8777
1.0597	2.2313	4.2552	1.5843	1.7834	1.2307	2.194	1.7253	2.7736	1.5532	1.6766	1.6372	1.5864	1.7087	1.6258	1.4619	1.7139	1.7429	1.6735	1.7004	1.7979	0.66254	2.2188	2.5009	1.3054	1.3261	1.1965	1.2525	1.3261	1.3769	1.4122	1.3645	1.0586	1.549	0.8388	2.0384	1.6807	1.5034	1.7689	0.74653	1.6786	3.0846	3.7368	4.6171	2.0291	1.3282	1.4174	1.4412	1.5314	1.3054
2.1463	1.5522	1.4495	1.5335	1.6258	1.4298	1.3272	1.3842	1.267	1.6507	1.3894	1.5615	1.2556	1.2432	1.4734	1.2795	1.3914	1.2608	1.6724	1.4682	0.35771	3.2899	1.352	1.2826	1.2546	1.3686	1.1696	1.2981	1.4402	1.378	1.3749	1.1488	1.603	1.5916	1.1457	1.5397	1.7834	2.3236	1.8497	0.77763	1.8228	3.2173	3.9255	4.1899	2.4231	0.99433	0.20529	1.9182	1.2027	1.38
2.0923	1.828	1.8622	1.3914	1.8518	1.7637	1.2732	2.6543	2.6201	1.435	2.0654	1.7906	3.1593	3.744	1.3697	1.435	1.3811	1.378	1.0742	0.89272	1.605	1.4474	1.3697	1.5366	1.5656	1.3977	1.4785	1.5957	1.5262	0.9653	1.8953	1.3614	3.153	1.9441	1.9866	1.3821	2.3474	2.0664	1.774	1.3645	2.4179	1.1613	2.9788	3.6673	0.72475	2.251	0.76104	3.1966	1.7066	1.7523
0.97878	1.4412	0.88546	0.55575	1.8674	1.8445	1.2307	2.2707	1.2888	1.1374	1.1302	2.4262	4.0292	4.558	1.9534	1.9026	2.2728	1.6952	2.0457	2.0934	2.307	0.97152	1.6869	1.1644	0.52879	1.9617	1.1747	0.72372	1.7637	1.999	1.5418	1.4008	1.6496	1.5335	1.4143	1.1219	1.6123	1.4661	0.92175	2.2499	1.2577	1.5998	2.9	2.0374	2.0301	1.3479	1.2701	1.4806	1.4526	1.6133
5.3957	5.4144	5.0836	6.4564	6.079	6.3766	5.6809	5.7047	5.6186	5.7856	5.4849	5.7234	6.2273	6.5041	5.7285	5.7296	5.74	5.3594	6.0178	5.9836	6.2086	6.5974	4.9509	5.0297	4.6056	5.7918	5.4165	5.375	5.3739	5.543	5.2039	5.3325	5.2547	5.1738	5.1313	5.0784	5.1158	5.0795	5.0422	5.234	5.1552	5.5222	5.9971	6.0894	6.418	5.6062	5.1884	5.0961	5.1365	5.1904
1.6517	2.0923	1.5169	1.5988	0.84814	0.81392	0.4448	1.3365	1.4039	1.5293	1.0835	0.25092	1.9472	3.4257	2.4718	1.6579	2.2064	1.8653	1.2598	0.68432	1.7108	1.3085	2.2302	0.80459	0.092279	0.3349	0.74134	0.56093	0.82947	0.70194	0.31105	0.38156	0.86991	0.34631	0.75793	1.1022	0.99226	1.0078	1.0835	1.3126	1.3645	1.3852	1.4962	1.6994	0.91553	2.0426	2.4459	2.0519	1.5947	1.8632
-0.60655	-0.70713	-0.51013	-0.24469	-0.099537	0	-0.011405	-0.023847	-0.071542	-0.39607	0.37948	0.62833	1.6133	2.7984	1.4713	-0.39711	-0.24884	-0.19285	-0.22914	0.5236	-0.6107	-0.56715	-0.38156	-0.59722	-0.29861	-0.55471	-0.27891	-0.22188	-0.2561	-0.086058	-0.31313	0.050805	0	-0.20841	0.99226	0.93108	0.048732	-0.67084	-0.74653	-0.69779	-0.41888	-0.74653	-0.62107	-0.52049	-0.81807	-0.31624	-0.48835	-0.40955	-0.66254	-0.56197
-0.23744	-0.17315	0.04251	-0.048732	-0.046658	0.27269	0.068432	0.26232	0.19804	-0.50494	0.086058	1.0773	1.8528	3.3293	0.98604	-0.50805	-0.45103	-0.41681	-0.40126	-0.22396	-0.18041	-0.24781	-0.18248	-0.1182	-0.2364	-0.23225	-0.20633	-0.069468	-0.12027	-0.088132	0.31105	0.048732	-0.31624	-0.55886	0.67809	1.5283	-0.070505	0.067395	0.061174	0.25506	0.15553	0.20944	0.12338	0.31209	0.39089	0.27684	0.11613	0.18145	1.3583	1.6766
-1.2795	-1.2235	-1.0866	-1.0389	-1.042	-0.88132	-1.2753	-0.18248	-0.61277	-0.96219	-1.0213	-0.34838	0.59929	2.4355	-0.28098	-1.042	-1.013	-0.75897	-1.1582	-1.2774	0.24262	-0.85021	-0.62936	-0.59204	0.15656	0.55575	-0.46554	-0.86991	-0.92383	-1.2183	-0.60137	-0.63247	-0.73823	-0.788	-0.95908	-0.78178	-0.77452	-0.76726	-0.74342	-0.84606	-0.63351	-0.7797	-0.58893	-0.41059	-0.54953	-1.0669	-0.090205	-1.4288	0.32972	0.72475
0.563	1.1747	-0.6024	-0.61381	-0.77452	-1.3355	0.36186	-0.63455	-0.58063	-0.97152	0.68743	-0.42718	-0.13168	1.8	-0.47384	-0.63455	-0.61899	-0.60033	-0.90931	-0.40229	-0.038363	-0.48939	-0.69676	-0.96426	0.98085	2.4469	2.5589	-0.31727	-1.0379	-1.0545	-0.88546	-0.95493	-0.41577	-1.1519	-1.1063	-1.3852	-0.5122	-1.3572	-0.077763	-1.2245	-0.35149	-0.94042	-0.91138	-0.60759	-0.71853	-0.57337	-0.67602	-0.5039	-0.84917	-0.38571
7.7348	7.655	6.9997	5.9608	5.9846	5.9401	5.9691	5.9349	6.0956	5.8063	6.2013	11.102	13.447	13.556	13.701	13.697	13.301	13.115	13.485	12.608	11.874	10.439	6.3434	5.7845	7.0142	7.5098	7.4072	6.3237	6.0158	6.4761	6.1422	6.4357	6.2501	6.277	6.078	6.1049	5.9577	6.0977	6.2719	6.3538	6.1111	5.8374	6.9489	6.1568	6.1039	6.3175	6.2397	6.3341	6.0427	6.0738
11.595	11.35	10.678	10.109	9.9817	9.7422	10.12	10.275	12.035	13.611	8.4026	11.991	13.429	12.115	12.631	12.588	12.925	10.969	11.369	12.73	12.433	12.484	11.93	10.878	7.9267	5.179	11.146	11.241	11.216	11.284	11.573	11.282	11.234	11.148	11.24	11.211	11.098	10.981	10.98	11.089	11.099	11.077	11.017	11.266	11.835	11.759	11.802	11.697	11.575	11.448
2.0229	-0.055989	0.0020737	0.1379	0.058063	0.197	0.26128	0.3349	0.06221	-0.17108	0.67187	0.69883	-0.16901	0.12027	-0.23951	-0.11405	0.13375	0.088132	0.060137	0.11924	0.13272	0.27684	0.13064	-0.69054	-0.58789	0.0591	1.8922	0.083984	0.072579	0.14205	0.23225	0.17108	0.54019	0.25403	-0.27891	-0.20011	-0.074653	-0.26025	-0.21152	-0.067395	0.046658	0.19596	-0.32764	0.18352	-0.014516	0.0082947	-0.48835	0.036289	-0.0020737	-0.33283
0.4531	0.32246	1.1675	0.15034	1.8549	1.3375	0.72994	0.80874	0.34319	0.40852	2.0716	1.5957	0.29239	0.43444	0.54642	0.64077	0.563	0.56508	0.65217	0.51324	0.5319	0.094353	0.97463	0.41059	0.75793	1.7108	0.83362	0.61588	0.56508	0.68432	0.42822	0.15242	1.6237	2.7539	1.0752	0.24469	0.21048	0.19078	0.058063	0.28721	0.38259	0.31313	0.4334	0.30794	0.4334	0.43236	0.38467	0.41163	-0.014516	0.31624
0.17419	-0.067395	0.50183	0.59618	0.45828	0.37223	0.17626	0.15864	0.42407	0.30794	0.75171	1.0638	0.060137	0.057026	0.099537	0.16175	0.22396	0.038363	0.33179	0.13894	0.22811	0.18352	0.31416	0.35978	0.41059	0.54123	0.61485	0.67395	0.53086	0.65632	0.45725	-0.053916	1.6994	2.4397	0.62314	0.21359	-0.012442	0.15345	0.33905	-0.0041474	0.060137	-0.033179	-0.032142	0	-0.034216	0.12338	0.11405	-0.034216	0.079837	0.092279
-1.8176	-2.9146	-2.1711	-2.2002	-2.6813	-2.3391	-2.4469	-2.7227	-1.8528	-2.9716	-2.4075	-1.8477	-2.6564	-1.9876	-2.7321	-1.8684	-2.421	-1.8269	-1.9316	-2.6657	-1.6724	-0.59411	-0.11509	-2.1317	-2.5641	-2.645	-2.6294	-2.6771	-3.01	-2.4096	-2.9934	-2.3018	-1.8414	-2.3754	-2.8897	-2.8026	-3.1302	-3.0794	-3.1738	-3.0151	-3.1157	-2.9405	-3.1582	-3.1157	-2.9571	-2.8212	-3.0037	-2.8949	-2.9612	-2.814
-2.336	-3.2121	-1.4174	-3.0276	-1.9441	-1.6123	-1.9078	-1.5822	0.77245	-2.3889	-2.5185	-2.7362	-2.8855	-1.0628	-2.8772	-1.5926	-2.4781	-1.4215	-2.0239	-2.5029	-2.1027	-0.46658	-0.047695	-1.2961	-2.2251	-2.1732	-2.589	-1.6652	-0.97878	-1.7326	-2.588	-2.7559	-2.5102	-2.5828	-2.9706	-2.1535	-2.1494	-2.7373	-2.4034	-2.4345	-2.3723	-3.011	-2.7559	-1.4391	-2.701	-2.8752	-2.5517	-2.8928	-3.2235	-1.9337
-1.5159	-1.5988	-1.4816	-1.3956	-1.3355	-1.3033	-1.6755	-0.77348	0.58478	-1.4422	-1.8	-1.6258	-1.772	-1.773	-1.829	-1.4101	-1.4412	-1.5273	-1.5283	-1.323	-1.1758	-0.48524	-0.64492	-1.1903	-1.125	-0.99122	-1.4433	-1.3261	-0.18456	0.34631	-1.6963	-1.6185	-1.4319	-1.519	-1.6237	-1.5781	-1.4257	-1.4671	-1.5013	-1.3873	-1.5252	-1.8508	-1.0576	-0.44895	-1.9741	-1.802	-1.9814	-2.0156	-1.97	-1.7875
-1.8933	-2.5537	-1.6289	-2.0115	-1.7574	-1.6154	-1.7647	-1.9223	-1.3054	-1.4028	-1.7637	-1.688	-1.744	-1.6621	-1.688	-1.549	-1.3655	-1.5314	-1.829	-1.4267	-2.0374	-1.7004	-1.6714	-1.8756	-2.0436	-1.4982	-1.2909	-1.7668	-1.3116	-0.63766	-2.1297	-2.1556	-2.2085	-2.0778	-2.3619	-1.9534	-2.0478	-1.9907	-2.14	-1.971	-1.999	-2.6242	-0.92486	-2.5869	-2.3744	-2.3692	-1.9337	-2.083	-2.1369	-2.0415
-1.7087	-2.9726	-1.6558	-2.4532	-2.1514	-2.532	-2.3702	-2.4843	-2.4107	-2.1597	-2.9985	-1.3977	-2.0301	-2.0778	-2.0467	-2.1214	-2.0094	-2.0571	-2.1048	-2.2541	-2.7881	-0.61174	-1.8425	-2.1846	-1.9296	-2.3868	-2.5579	-1.7492	-2.3899	-2.7373	-1.6123	-2.3184	-1.6247	-2.1203	-2.1432	-2.196	-1.8902	-2.7507	-1.2712	-2.2334	-2.1629	-2.1224	-2.3163	-2.1525	-2.2987	-2.1432	-2.391	-2.2499	-2.2199	-2.2375
-3.3386	-2.2624	-3.7254	-1.4215	-2.392	-2.8378	-2.9954	-2.813	-3.2308	-2.4708	-3.0628	-2.476	-2.9965	-2.4314	-2.7507	-2.5537	-2.7176	-2.6471	-2.8783	-2.421	-2.8202	-2.2883	-2.2375	-2.6751	-2.5848	-2.5257	-2.5703	-2.5361	-2.477	-2.3899	-2.336	-2.7653	-3.0328	-2.1162	-1.969	-2.0332	-2.6191	-2.3671	0.62107	-2.8306	-2.4615	-2.7362	-2.8855	-3.1831	-2.3993	-2.6502	-3.1126	-2.0861	-2.9747	-2.9426
-1.8922	-2.5247	-2.6305	-2.505	-2.4646	-2.4853	-2.5164	-2.589	-2.2489	-2.1597	-2.2157	-2.477	-2.3993	-1.7626	-2.5465	-2.0395	-2.4418	-2.3018	-2.3526	-2.3122	-2.2645	-2.6253	-1.9503	-2.1463	-2.3039	-1.97	-2.0581	-2.2873	-1.857	-1.8746	-1.8871	-1.9068	-2.2458	-2.4283	-0.76208	-1.5947	-2.0633	-2.5112	-1.9005	-2.2282	-2.2893	-2.2738	-2.1432	-2.3941	-2.112	-2.2997	-2.194	-2.1038	-2.1981	-2.2137
4.4055	3.7783	4.7	3.208	3.1924	3.3791	3.573	3.292	3.3811	3.2204	3.3376	3.2495	2.8472	4.0271	2.8337	2.7808	2.9612	2.8368	3.0193	2.9695	2.9934	3.0473	2.9115	3.2152	2.7611	2.8171	2.8358	2.4283	3.2318	2.4729	3.3843	2.9519	2.6709	1.0462	5.7088	3.1479	2.6751	2.7642	2.6263	2.7404	2.674	2.7829	2.4438	3.179	2.7632	2.9322	2.7694	2.9685	2.8793	3.0027
-0.71957	2.0872	0.8782	-0.25092	-0.32557	-0.068432	-0.0591	-0.18041	-0.10783	-0.32764	-0.076726	-0.12131	-0.032142	-0.095389	-0.56404	0.44169	-0.22292	-0.29446	-0.20011	-0.52983	0.014516	-0.25714	-0.071542	-0.13894	-0.48835	0.56715	0.12961	-0.049768	0.041474	-0.045621	-0.50287	0.77452	0.71957	-0.022811	2.5434	-0.23847	-0.41266	-0.40852	0.52879	-0.49561	-0.20218	0.46554	-0.2561	-0.10057	-0.0031105	0.033179	-0.085021	-0.34631	0.030068	-0.12027
-0.33697	0.78178	1.1893	-0.060137	-0.73408	-0.83362	-0.788	-0.75275	-0.77867	-0.65943	-0.45725	-0.82844	-0.85747	-1.0804	-0.94145	-0.9259	-0.85021	-1.0182	-0.71749	-1.1281	-0.52153	-0.8274	-0.6698	-0.75586	-0.65528	-0.49665	-0.6895	-0.93212	-0.12857	-0.40437	-1.0617	-0.57648	-0.48109	-0.96634	-0.21981	-0.75378	-0.46347	-0.86576	-0.76519	-1.0462	0.064284	0.73305	-0.44169	-0.58063	-0.50702	-0.46139	-0.60552	-0.6501	-0.51946	-0.6304
2.8928	2.2354	3.4434	3.6507	3.6694	3.7202	3.6974	3.7233	3.5419	3.406	3.6601	3.6486	3.4962	3.4734	3.6321	3.2464	2.1597	2.0135	3.3998	3.6207	3.659	3.5035	3.517	3.5678	3.0452	4.0623	3.6995	3.7202	3.2712	3.8363	3.6404	3.7192	3.7596	3.6735	3.8363	3.7731	3.7637	3.7212	1.9047	3.2609	2.8088	3.5107	3.9193	3.7399	3.742	3.7596	3.5367	3.7772	3.6393	3.2339
2.4739	-2.6865	0.046658	0.021774	-2.1732	-2.3557	-2.5869	-1.9368	-2.2375	-2.2686	-2.4127	-2.5154	-1.2556	-2.0913	1.2515	0.79733	-1.5096	0.28721	2.1349	3.0048	-2.6802	-3.1976	-2.2354	-2.8897	-2.8275	-1.4308	-2.8596	-2.2074	-1.7689	-2.3713	-2.1027	-2.3267	-2.0229	-2.2271	-2.5714	-1.8466	-1.9659	0.49768	-1.1882	-0.4251	-0.099537	1.1976	0.25403	-2.3381	-2.3308	-1.7937	-2.1546	-2.2406	-1.8083	-1.2867
-0.81081	-1.6392	-2.2334	-1.9316	-2.1442	-1.9389	-2.0146	-2.4573	-1.4537	-1.7699	-1.5905	-1.6351	-2.0612	-2.6419	1.0026	-1.6724	1.4682	-4.025	-0.61174	3.2972	-0.98189	-2.1452	-2.2779	-2.1328	-1.1861	-1.6683	-2.4739	-1.4422	-1.7429	-1.7823	-1.7139	-1.5013	-2.3339	-0.99744	-1.6911	-1.0358	-1.5615	-1.5625	-1.8653	-1.8767	-0.37637	0.5039	0.041474	-2.1338	-1.2701	-1.5615	-1.4174	-1.4568	-1.3676	-1.744
-0.087095	0.30276	0.063247	0.68846	0.23122	0.57337	0.097463	0.67913	0.26336	0.22914	0.11613	0.12546	1.2401	0.18663	-0.9176	0.87717	1.4578	0.1576	4.2521	5.0038	1.4049	0.044584	0.74342	0.2561	0.60137	1.1582	0.77245	0.66462	0.81185	0.71231	0.6501	0.25092	0.65114	1.2079	0.83051	0.80459	0.85643	0.70402	0.52672	0.10368	1.8684	1.7906	2.0395	0.7092	0.8668	0.83362	0.53605	0.83673	0.66565	0.13168
-2.0695	-2.2105	-2.1038	-2.166	-2.3505	-1.9721	-2.1546	-1.8922	-1.8518	-1.9793	-1.9088	-1.5801	-1.7709	-2.0768	-0.41888	-0.013479	-1.6652	0.53294	1.6859	1.3189	-2.3526	-1.7409	-2.1048	-2.309	-2.2883	0.058063	-2.4355	-1.7834	-1.7595	-2.027	-2.2147	-2.4604	-2.0467	-1.5936	-1.6009	-2.3899	-2.336	-2.2624	-2.1867	-2.3059	-2.2603	-2.2748	-2.1307	-1.999	-1.8715	-2.026	-1.9638	-1.9679	-1.8539	-2.6232
-2.054	-2.6398	-2.674	-2.4552	-2.2645	-2.5372	-2.8067	-1.7367	-0.91657	-1.1073	-1.2598	-2.6533	-1.6704	-1.8093	-2.4387	-2.6875	-2.0758	-0.30794	-0.2955	-2.5289	-2.5714	-2.4625	-2.4304	-1.8684	-2.139	-0.74445	-2.4511	-1.8528	-2.0104	-3.0141	-1.6258	-0.83569	-2.9737	-2.59	-2.2499	-1.6413	-2.5766	-2.4376	-2.757	-2.3298	-2.4729	-2.5486	-2.5112	-2.2696	-2.2655	-2.2966	-2.6108	-2.1722	-2.1846	-2.6439
-2.3858	-2.337	-2.2779	-2.3008	-2.9934	-1.3634	-2.9353	-1.8487	-1.8933	-1.6994	-0.56923	-2.7891	-2.8067	-2.448	-2.5226	-2.617	-2.9208	-2.8472	-2.5019	-2.4926	-2.3993	-2.1784	-1.9731	-2.5102	-2.1203	-2.4459	-2.8969	-1.5833	-2.6636	-2.3402	-1.9679	-2.1774	-2.1338	-2.5029	-2.6636	-2.4013	-2.3329	-2.167	-2.5911	-1.8342	-2.5299	-1.7098	-2.2354	-1.689	-2.1432	-2.1203	-2.3899	-2.0042	-1.8871	-1.9586
-2.8047	-2.6844	-2.6802	-2.3536	-2.6875	-2.7539	-3.3179	-2.0861	-2.4138	-2.6429	-2.9353	-2.6315	-2.6294	-2.5921	-2.4148	-2.7559	-2.6906	-2.8212	-2.0042	-2.4521	-2.4563	-2.589	-2.2572	-2.6626	-2.5206	-1.8072	-2.7476	-2.0208	-1.464	-2.6522	-2.5403	-2.6844	-2.6274	-3.2961	-1.7886	-2.392	-2.7829	-1.7917	-2.2707	-2.4501	-2.4874	-2.1639	-2.7279	-2.391	-2.8399	-1.7968	-1.9296	-2.6647	-1.7647	-2.0343
-2.8606	-2.9716	-2.3132	-2.4905	-2.7466	-2.5475	-2.5786	-2.6979	-2.7756	-2.4355	-2.4832	-2.5175	-2.6885	-2.3329	-2.1162	-2.4635	-2.3495	-2.2188	-2.4469	-2.1981	-2.1691	-2.2147	-2.2209	-2.2852	-2.3516	-2.3806	-2.1089	-2.8212	0.29861	-2.4615	-2.6543	-2.2759	-2.4366	-2.3277	-2.702	-2.7777	-2.2375	-2.3039	-2.223	-2.2458	-2.3619	-2.1131	-2.1359	-2.2085	-2.2645	-2.5268	-1.8414	-1.9679	-2.0685	-2.025
-2.6149	-2.5309	-2.4138	-2.5631	-2.4293	-2.4822	-2.3547	-2.4158	-2.4117	-2.3049	-2.0726	-2.7165	-2.2147	-1.886	-1.6755	-2.1546	-2.2406	-2.4345	-2.2562	-2.1753	-2.1846	-2.1826	-2.3785	-2.0312	-1.5812	-2.0115	-2.8638	-2.0239	-1.2805	-1.7077	-2.1639	-2.8409	-2.1193	-2.2935	-2.3713	-2.3308	-2.3433	-2.2945	-2.2572	-2.3878	-2.251	-2.6481	-1.943	-2.2105	-2.1649	-2.4262	-2.1224	-1.6621	-1.8912	-2.5517
-2.4459	-2.3101	-2.6377	-2.139	-2.0384	-2.1193	-0.89479	-1.9721	-1.9762	-2.5921	-1.8269	-2.194	-2.4967	-2.0996	-0.67498	-2.3702	-2.3329	-2.2054	-2.3018	-2.8223	-1.8891	-2.5382	-1.5864	-2.6367	-1.3852	-1.1063	-1.9368	-2.7507	-2.6305	-2.505	-2.5257	-2.2002	-2.0498	-1.998	-1.802	-2.14	-1.7979	-1.744	-0.94871	-1.971	-2.4801	-1.3863	-1.8953	-1.8933	-2.111	-1.9285	-1.97	-1.9161	-1.7823	-1.745
-2.3184	-1.9845	-2.4438	-2.1846	-0.81185	-2.0602	-0.57752	-0.015553	-1.9938	-2.1743	-2.4791	-2.0737	-2.2696	-2.5921	-1.8435	-2.7238	-1.577	-2.1898	-1.8342	-0.13479	-2.1763	2.617	-2.9197	-0.75378	-1.324	-1.8767	-2.0996	-2.0021	-2.9923	-2.7373	-2.9612	-3.1707	-2.4272	-3.0711	-2.9405	-2.9685	-3.8073	-3.6683	-0.59618	-1.3168	-2.2043	-2.4749	-2.3878	-2.0291	-2.1349	-2.166	-2.1006	-2.1317	-2.4024	-1.9524
-2.3889	-2.0519	-2.5942	-1.5957	-1.9721	-1.9244	-0.73616	-0.23433	-2.0612	-2.3505	-1.6714	-0.39193	-1.1976	-1.5501	-2.0405	-2.1981	-1.9296	-2.0737	1.3572	-2.7238	2.391	-2.646	1.0794	0.18248	0.9176	-1.8093	-2.4397	-2.2676	-2.4304	-1.7886	-2.8741	-1.5407	-2.7808	-1.6164	-2.1483	-1.8466	-2.3557	-2.3298	-1.9876	-1.3977	-2.055	-1.9793	-1.0462	-2.476	-2.4957	-2.0851	-2.1214	-2.5154	-2.1784	-2.3111
-2.6564	-1.9379	-2.928	-1.1602	-2.534	-2.2748	-2.0332	-1.2442	-1.2857	2.3484	-2.8254	-0.38571	0.49457	-2.1784	-1.9265	-1.4194	-2.2354	-1.7865	1.4194	-2.4532	2.0737	-0.8865	-1.6372	1.3075	1.5833	1.3935	-2.4272	-2.7082	-1.8881	-2.6201	-2.7248	-2.3827	-3.1935	-1.66	-2.3225	-2.365	-2.2914	-2.2842	-2.5952	-2.0996	-2.3287	-2.2686	-1.1768	-2.1753	-2.3599	-2.3578	-2.1089	-2.2116	-2.1089	-2.3287
-2.1058	-1.4039	-1.746	-2.6305	-2.1214	-2.2292	-2.4335	-2.3599	-0.34008	-2.1888	-0.30379	-0.46969	-0.033179	-1.8912	-2.2769	-1.3106	-2.2012	0.10368	-2.4044	2.3619	-3.8757	1.1125	1.4464	1.6797	-0.74549	2.3526	-1.0607	-2.6491	-1.294	-2.6564	-2.5154	-2.3049	-2.2562	-2.3008	-2.4169	-2.3111	-2.3754	-2.2251	-2.2925	-2.2987	-2.1629	-2.7704	-1.9752	-2.5776	-2.1193	-2.2883	-2.0478	-2.4718	-1.7315	-1.998
-2.6626	-1.9907	-1.7968	-2.4179	-2.1359	-2.0415	-2.2095	-2.1525	-2.3547	-2.5123	-1.6776	-1.2121	-1.6361	-2.1421	-2.1929	-1.5957	-1.6206	1.3427	-2.4138	2.2365	-4.0333	1.0203	1.4101	1.6507	-0.87095	1.1924	0.44999	-0.98915	-1.8497	-1.9306	-1.8269	-1.5397	-2.2085	-3.1541	-1.6092	-2.3236	-2.5009	-2.2821	-2.222	-2.223	-2.6035	-1.9182	-2.3225	-2.2634	-2.1514	-1.2349	-2.1618	-2.1463	-2.3754	-2.5662
-2.7787	-2.7798	-2.7155	-3.0079	-2.7559	-2.3505	-2.3599	-2.4179	-2.6274	-2.6263	-2.5123	-2.4822	-2.6128	-2.0447	-2.2634	-2.2499	-2.5289	-1.7388	-1.9265	0.42822	-1.3707	2.1338	-0.70609	-0.64595	0.7994	1.3365	0.33801	-1.3997	-2.4781	-2.4511	-2.4107	-2.3018	-2.6491	-2.3402	-2.1898	-2.1857	-2.4687	-2.2966	-2.4791	-2.2883	-2.138	-2.3941	-2.14	-2.7124	-1.9088	-0.73097	0.42303	-2.5268	-2.898	-3.2101
-1.5086	-1.6973	-1.6206	-1.575	-2.0436	-1.014	-1.6579	-1.3925	-1.3303	-1.4028	-1.3925	-1.575	-1.6278	-1.7554	-1.5833	-0.68639	-1.6517	-1.0285	-1.3075	2.1535	-2.139	2.6927	-2.0861	1.548	1.5967	2.5734	-0.48006	-1.5988	-1.4412	-1.4039	-1.4568	-1.5314	-2.167	-0.36601	-0.73305	-1.1105	-1.2535	-1.8943	-1.3603	0.30172	-1.2307	-1.3334	-1.521	0.5039	-2.1711	0.12027	0.92694	0.47798	-1.3676	-0.022811
-1.1758	-0.86369	-1.1996	-0.98915	-1.0918	-1.0462	-1.2639	-0.82014	-1.5407	-0.71231	-1.1716	-1.0358	-1.1001	1.0047	-1.8622	0.37637	1.0711	0.16071	-0.72683	-0.78489	2.9011	-1.4682	0.6501	0.99537	1.9493	1.7564	-1.1986	-1.2743	-0.81392	-1.6382	-0.51324	-1.3437	-0.77659	-1.0192	-0.91242	-0.8668	-0.81081	-1.2649	-0.72475	-0.48939	-0.83673	-0.93627	-0.95597	0.33801	-1.5791	0.26439	0.73305	0.88028	-0.77867	-1.0462
-2.5994	-3.0981	-2.7528	-3.3189	-2.027	-2.5963	-2.6388	-2.8264	-2.5828	-1.7792	-2.1867	-2.1411	-2.3619	-2.2883	-1.2681	0.26854	1.6102	-1.5615	-2.6201	-2.6377	-0.65839	-0.7994	-0.394	0.40852	1.2867	0.068432	-2.8503	-2.8244	-2.4625	-2.4283	-3.0639	-2.2292	-2.3599	-2.3878	-2.4438	-2.0716	-2.5092	-2.4552	-2.1846	-2.2873	-2.2852	-1.9648	-2.4241	-2.6533	-1.1768	-0.64492	-1.2722	-1.9679	-2.9301	-1.6786
-1.772	-1.7429	-1.7295	-1.6154	-1.8145	-1.3012	-0.24469	0.83777	0.11405	-0.45725	-1.1996	-1.3489	-1.2204	-1.0047	0.080874	1.2577	2.0561	-1.0006	-1.7564	-1.1561	-0.49561	-1.6113	-0.94767	1.0306	1.6641	-0.76415	-1.7564	-1.8808	-2.0135	-1.9462	-1.9119	-1.915	-2.1245	-1.549	-1.6247	-1.6911	-1.6672	-2.6077	-0.81288	-1.5418	-1.9897	-0.99433	-1.52	-2.1711	0.43029	-2.0115	-1.631	-1.5387	-1.8414	-1.1094
0.38156	-0.61485	-0.78385	-0.24884	-1.632	-0.48732	0.51531	1.8715	1.2276	0.75689	0.24262	-1.1582	-0.94767	-1.1053	-0.06221	1.2318	0.42096	-1.6662	-1.3075	-1.0804	-0.93108	-1.324	-1.3334	1.4132	-0.006221	-1.631	-1.5356	-1.3634	-1.886	-0.90413	-1.5148	-1.5407	-2.2116	-0.32349	-1.6341	-1.5719	-1.4028	-1.4609	-1.4049	-1.6496	-1.549	-1.3531	-1.5895	-1.4889	-1.6963	-1.4806	-1.5719	-0.86991	-1.5076	-1.407
6.2138	5.1718	5.882	5.5264	5.938	6.585	6.9956	7.3906	5.2475	5.2329	5.5419	5.3377	4.8555	5.2008	5.2298	5.2983	5.1541	5.3366	5.6218	6.2801	6.3641	6.9614	4.7062	4.6056	4.8109	4.7767	4.587	5.3926	5.5813	5.3936	5.5824	5.5129	5.5336	5.3729	6.2926	6.7084	6.417	6.5259	6.4367	4.8918	4.8389	4.9291	4.952	5.0525	5.0359	5.1137	5.3739	6.1775	6.1329	4.9862
-1.6745	-1.5325	-1.66	-2.1338	-0.53086	-1.8145	-1.7377	-1.6983	-1.8777	-1.8155	-1.352	-1.3261	-1.4941	-1.4568	-1.7844	-0.88754	-1.2535	-1.5978	-1.1623	-0.60344	-0.58996	0.3743	-0.018663	-1.2556	-1.2038	-1.2795	-1.3873	-1.2017	-1.2027	-1.4319	-1.2846	-1.1312	-1.012	-1.5428	-0.85747	-0.79733	-0.68017	0.43547	1.3873	1.3396	-1.4454	-1.1115	-1.2546	-1.2504	-1.1861	-1.4143	-1.3821	-0.79318	0.49561	-0.63558
-0.43962	-0.83673	-0.24988	-0.44273	-0.44688	-0.51116	-0.28928	-0.31831	-0.44792	-0.34734	-0.40022	0.90413	0.021774	-0.17523	-0.006221	-0.057026	-0.93108	0.44273	1.211	1.7346	0.044584	0.029032	-0.082947	-0.44066	-0.59307	0.16589	0.033179	-0.3349	-0.30068	-0.35149	-0.17315	-0.77037	1.2567	0.69883	-0.13583	-0.58789	0.072579	1.8041	2.8005	3.2878	0.67809	-0.63247	-0.14723	0.11509	0.74756	0.15138	-0.31831	-0.53086	1.1146	-0.30794
-0.42199	-0.27787	-0.82533	-0.13997	-0.72268	-0.25714	-0.46658	-0.6107	-0.023847	-0.37948	-0.76208	0.73823	0.26543	-0.11405	-0.13997	0.089168	0.088132	-0.62107	0.7289	1.0876	1.0731	-0.20426	-0.55471	-0.41785	-0.10887	-0.31002	0.35771	-0.53708	-0.31624	-0.59722	-1.8642	0.029032	0.75275	2.054	0.022811	-0.19078	-0.24677	1.52	2.645	3.3117	-0.097463	0.23018	-0.51946	-0.44584	0.11198	0.59411	-0.39089	-0.35667	-0.59618	-0.44895
-0.41266	-0.84814	0.025921	-0.25092	-0.64492	0.34734	-0.8668	0.16175	-0.31624	-0.97359	1.1965	-0.39607	-0.34008	0.37223	-0.43755	-0.37534	-1.0876	0.11302	-0.197	-0.079837	-0.23225	0.0591	-0.80563	0.40333	-0.40126	-0.10783	-0.31831	0.83673	0.51116	-0.27165	-0.19596	0.80459	0.032142	2.3381	1.3562	-0.52153	-0.11094	1.2276	2.3194	2.4884	0.053916	-0.35253	-0.38052	-0.038363	-0.35564	-0.43547	-0.24781	-0.24055	-0.95804	0.031105
0.06221	0.19078	0.035253	0.26543	0.16797	0.0985	-0.22292	-0.26439	-0.34838	-0.32453	-0.61381	-0.032142	-0.63247	-0.71853	-1.3593	0.22603	-1.1385	0.18248	-0.33386	0.065321	0.080874	-0.025921	-0.1182	0.0010368	-0.38571	-0.76934	0.086058	0.74445	0.43029	-0.069468	-0.45517	0.33075	2.0021	1.3831	2.3744	2.194	0.040437	0.4645	0.72786	0.22914	-0.097463	-0.94456	0.68535	-0.16382	-0.26336	-0.24469	-0.37534	-0.41992	-0.22292	-0.49354
-0.95389	0.065321	-0.35149	-0.49354	1.3614	-0.28098	-0.5236	-0.43962	-0.75586	-0.42718	0.39193	-0.43236	-1.1177	0.75067	0.45621	-0.49146	-0.61899	-0.43029	0.57856	-0.18456	-0.77141	0.11094	-0.055989	-0.19389	-0.15967	-0.25921	-0.32142	-0.096426	-0.36704	-0.26854	-0.17108	0.21981	1.8549	2.1131	1.8839	2.8275	-0.55575	-0.59515	-0.055989	-1.1364	0.79526	-0.5827	0.77659	-0.079837	-0.47591	0.22707	-0.18974	-0.65528	-0.1182	-0.54434
-0.3349	-0.24781	-0.47695	-0.31831	-0.18559	-0.6698	-0.079837	-0.30587	-0.48628	0.35771	1.1623	0.0072579	-0.38778	-0.30898	-0.23122	-0.15242	-0.14516	-0.10472	-0.18041	-0.24988	0.1379	-0.083984	-0.23018	-0.20115	-0.20529	-0.20011	-0.24262	-0.24158	-0.28306	-0.29757	0.073616	0.16901	1.7305	2.5226	1.0337	-0.16382	-0.11509	-0.61381	0.20841	-0.29965	-0.27062	-0.86473	0.39089	1.2027	1.8176	2.9094	2.8015	-0.14827	-0.30587	-0.13375
-1.3251	0.34527	-0.8388	0.20322	-0.54123	-0.22914	0.28824	-0.28824	-0.71542	0.65321	0.36082	-0.10576	-0.82325	0.24781	-0.2758	-0.41992	-0.14101	-0.22707	-0.10161	-0.31105	-0.37845	-0.23951	-0.46036	-0.013479	-0.36082	-0.19907	-0.20841	-0.25921	-0.40022	-0.37948	0.43962	-0.2955	-0.39607	-0.11716	0.043547	0.11094	-0.197	0.16382	-0.81703	0.30172	0.86162	-0.41577	-0.40022	0.93212	1.8051	2.6305	3.1873	2.562	0.55367	-0.43755
-0.89583	-0.60552	-0.65839	-0.78074	-0.66358	-0.6615	-0.5827	-0.54538	-0.52153	-0.8274	-0.6418	-1.2961	0.42925	-0.57856	-0.62418	-0.394	-0.48006	-0.47798	-0.52568	-0.20633	-0.60759	0.64492	-0.0082947	0.36912	0.788	2.1349	0.49457	-0.40852	-0.43962	-0.34216	0.56197	0.75378	0.50805	0.49561	-0.89376	-0.52672	-1.239	0.21152	-0.67498	-0.24469	-0.28409	-0.23847	-0.67602	-0.58167	1.3365	2.5112	3.3635	3.1841	-0.33075	-0.32868
-0.51842	-0.64492	-0.072579	-0.99018	-1.2608	-0.99537	-0.99329	-0.72786	-1.4868	0.12857	-0.97567	-0.69676	-1.1675	-0.031105	-1.2162	1.1519	-0.67395	-0.74964	-0.13168	-0.43547	0.06221	-0.0010368	-0.095389	0.1773	1.407	1.7357	2.4677	0.058063	-0.46036	-0.8077	-1.1105	-0.85954	-0.41266	-0.69365	-2.1307	-3.5958	-7.1998	-0.42303	-0.39918	-0.14723	-0.24781	-0.36704	-0.55678	-1.1571	0.80252	2.166	3.2391	2.3256	-0.17004	-0.52879
-0.99744	-1.5148	-0.92486	-1.492	-0.62003	-0.96426	-0.89583	-0.8865	-1.181	-1.0752	-1.0928	-0.82429	-1.1084	-1.1664	-1.0638	-1.2681	-0.88961	-1.1955	-0.8865	-1.1011	-0.54745	-0.85125	-1.1976	-0.36912	-0.36497	0.39918	1.9368	1.04	-1.0752	-0.66876	-1.5325	-0.38052	-0.59307	-1.4671	-0.022811	-0.79837	-0.61277	-1.0368	-0.34631	1.237	-0.62522	-1.1374	-0.71231	-1.378	0.43029	1.7989	1.9773	0.11405	0.20633	-0.4334
-0.89687	-1.0659	-0.66565	-1.1779	-0.9062	-1.0503	-1.1426	-1.0524	-1.8362	0.54019	-1.6268	-1.1063	0.22085	-1.9534	-0.57648	-1.1073	-0.69883	-0.84295	-1.0057	-1.2898	-1.4661	-0.006221	-0.67187	-0.60655	-0.46554	0.71127	1.1519	1.1872	-0.91968	-1.2338	-0.9653	-1.2079	-1.127	-1.3583	-1.7357	0.0394	-1.2898	-0.81288	-0.10265	0.018663	-1.0991	-0.77037	-1.1094	-0.78904	0.21152	1.5781	-0.73719	-1.3365	-0.82947	-0.49872
-1.3137	-1.7782	-0.45621	-1.2255	-1.0348	-1.3925	-0.66047	-1.1561	-1.154	-1.4702	-0.80148	-1.3769	-1.1934	-1.4257	-1.6133	-0.90516	0.10576	-0.89894	-1.3178	-0.55471	-0.78385	-0.81288	-0.45621	0.55782	-0.9964	-0.6107	-1.1385	-1.0275	-1.0203	-0.99329	-1.3821	-0.57545	-1.3479	-1.0171	-0.5236	-0.41681	-0.83258	-0.8865	-1.2556	-1.0939	0.72475	-0.65114	-1.1333	-1.3396	-1.0607	-1.0731	-1.5356	-0.31624	-1.2629	-0.84606
-0.36186	-1.3075	-1.3997	-1.266	-1.4837	-0.85332	-1.7523	-0.95908	-0.31209	-1.7958	-0.44584	-1.4443	-1.2421	-1.237	-0.9964	-0.67602	-1.0534	-0.48628	-1.1737	-1.0814	-0.99744	-0.75378	0.6812	1.6113	2.0955	1.0845	1.1685	-1.1768	-1.013	-1.3054	-0.75171	-1.0762	-1.2701	-1.1167	-0.12131	-0.8585	-0.57856	-0.58789	-0.92175	-1.0876	0.31624	-0.76208	-0.024884	-0.0591	-1.1447	-1.3023	-0.88028	-1.3593	-1.5273	0.10991
-1.2753	-1.0597	-1.3925	-0.36912	-1.2629	-0.85125	-0.16589	-0.93108	0.16589	-1.1084	-0.84606	-0.027995	-0.62522	-0.83777	-0.60759	-0.55989	-0.60448	-0.7206	-0.79629	0.047695	-0.73201	0.075689	1.2722	2.0789	2.4926	2.363	1.4796	-1.3189	-0.5236	-0.81288	-0.9456	-0.98707	-0.27995	-0.76104	-0.63662	-0.51635	-0.49768	-0.6418	-0.61796	-0.65736	-0.60137	-0.98085	-0.49561	1.4433	-0.65217	-0.60552	-0.93419	-0.97878	-0.24055	0.37223
-1.1063	-1.3686	-1.0037	-1.0742	-1.6216	-0.62522	-0.88132	-1.0037	0.035253	-1.209	-0.9767	-0.89168	-1.1976	-1.3033	-0.62625	-1.0472	-0.5433	-0.73305	-0.22603	-0.32868	-0.93108	-0.18248	1.3282	2.138	2.6616	1.5895	-0.56923	-0.88857	-1.0679	-1.1136	-0.79007	-0.77763	-0.99848	-0.6501	-0.77452	-0.99537	-0.17315	-0.53916	-0.57337	-0.96945	-0.20426	-0.6501	-0.43444	-0.047695	-0.42822	-0.56093	-1.0182	-0.16175	0.46243	0.033179
-0.94353	-1.153	-0.98604	-0.92175	-1.126	-0.77245	-0.96323	-0.95804	-0.98915	-1.1302	-0.99744	-0.31935	-0.97982	-0.45621	-0.65736	-0.45828	0.13894	0.063247	0.41888	-0.37119	-0.12027	-0.2364	1.3738	1.7377	0.84503	-0.67395	-0.85954	0.38882	0.052879	-0.39815	-0.64595	-0.80148	-0.85954	0.044584	-1.0016	-1.6704	0.64284	-1.0327	-0.67291	-0.74549	-0.90931	-0.95389	-0.86991	-0.95804	-0.75897	-1.0379	-0.67084	-0.4925	0.41681	-0.63455
-0.96115	-0.91242	-0.22707	-0.85643	-0.38052	-0.43029	-0.55264	-0.69883	0.15864	-0.62625	-0.73512	-0.73823	-0.42096	-0.18352	-0.45621	-0.394	-0.69157	-0.074653	-0.68224	-0.788	-0.65736	-0.58374	-0.82947	-1.2338	-0.24055	-0.30794	-1.3106	-0.015553	0.60552	-0.13894	-1.0244	0.11924	-0.14723	-1.0047	-0.93212	-1.0669	-0.84606	-0.80252	-0.83155	-0.65114	-0.52568	-1.2359	-0.63247	-0.80874	-0.60966	-0.64077	-0.75378	-0.54953	-0.77867	-1.0617
-1.3054	-0.35978	-0.95597	-0.59722	0.51531	-0.22914	-0.67498	-0.61485	0.90931	1.5708	2.0695	1.6206	-0.11716	-0.65943	-1.0368	-0.6812	-0.71749	-1.1198	-0.84088	-1.1519	-0.66358	-1.1374	-1.267	-0.47176	-0.88235	-0.84503	-0.85954	-0.8471	-0.97152	-1.1229	-1.0203	-0.9964	-1.0441	-0.95389	-0.70816	-0.9456	-0.88857	-0.96634	-0.77556	-1.9544	0.029032	-0.20944	-0.77141	-1.014	-1.0037	-0.91138	-1.5439	-0.032142	-0.73616	-0.47073
4.896	3.0545	4.2324	5.3491	6.3662	2.8119	1.6714	1.1924	2.139	2.6429	2.928	3.097	3.0525	5.2506	6.4689	5.826	4.6658	4.5818	5.3968	5.3771	5.7026	5.7099	5.9618	6.2459	5.8001	5.7887	5.4932	4.8109	4.7664	4.8452	4.5911	4.0489	3.0214	1.4495	0.65425	-1.3261	5.7171	4.4605	1.6061	7.3066	7.7255	7.0329	6.9603	6.4647	7.2247	5.6943	5.9981	6.6534	6.5622	7.0308
-2.8057	-2.6719	-1.7803	-2.421	-2.5537	-2.6896	-1.3116	1.7129	-2.8876	1.6009	-1.2691	-0.55678	-0.42822	-1.4972	-1.7543	-2.6035	-2.7943	-2.8119	-2.6751	-2.8223	-1.0597	1.5532	-3.5139	-0.15656	-1.7087	-2.3474	-3.1167	-2.7393	-3.8768	-3.911	-1.4236	-1.5076	-2.956	-3.1603	-2.8316	-3.1624	-2.8275	-3.4745	-2.4895	-3.0421	-3.0079	-3.1624	-3.0317	-2.8762	-3.0058	-2.8918	-2.8845	-2.7373	-3.1333	-2.6045
-2.7933	-3.1074	-3.095	-3.0576	-2.6325	-2.2769	-2.448	-2.5776	-2.0353	-0.77037	-1.6361	-1.4754	-1.8134	-2.9083	-2.645	-2.5195	-1.7771	1.1136	-2.2209	1.9379	-1.0991	-0.8782	2.3878	-1.3966	0.86162	-1.6621	-2.504	-1.6289	-3.2578	-2.419	-0.87302	0.53086	-2.2976	-2.7767	-2.6128	-2.7839	-2.758	-2.701	-2.7684	-2.9197	-2.9674	-1.6258	-2.533	-2.6688	-2.7113	-2.5143	-2.5807	-2.5434	-3.124	-2.0405
-1.8642	-2.8036	-2.2199	-0.72994	-2.8866	-2.9944	-3.0068	-3.0027	-2.8358	-2.9436	-3.0297	-2.4075	-2.2769	-2.1898	-2.3889	-2.2665	-1.3883	0.63973	-1.997	1.6807	1.7595	-4.2023	0.95286	0.93834	0.75586	2.2323	-2.928	1.3323	-4.1909	-0.90102	-0.5122	0.63144	-1.1955	-3.0691	-2.3671	-2.561	-2.5506	-2.5548	-2.6263	-2.6688	-3.1862	-1.1664	-2.5589	-3.0576	-2.9488	-3.0265	-2.9394	-2.8337	-3.2194	-2.8772
-2.8513	-2.4812	-1.8705	-1.5884	-3.1157	-3.1364	-3.2256	-2.9706	-3.0079	-2.8409	-2.9954	-2.7279	-2.7207	-2.0758	-1.8798	-2.6108	-1.7305	1.8	-3.4848	1.6932	1.8217	-3.7783	0.26439	1.1208	1.2929	-1.239	-2.5092	-2.0602	-3.3521	-1.2515	-0.33801	0.031105	-2.1577	-2.6201	-2.0561	-0.95597	-2.4563	-2.1162	-0.82947	-0.6304	1.6227	1.2732	-3.2909	0.26854	0.16901	-2.0644	-2.6605	-3.1758	-2.5257	-2.3889
-3.35	-2.0301	-2.3111	-2.6937	-2.7414	-1.9897	-2.0322	-2.5745	-2.4024	-2.1919	-2.4345	-0.1773	2.2375	-3.489	-0.46658	0.45414	-2.5475	-1.746	0.78074	-0.04251	-2.082	1.6517	2.0955	-2.6398	0.78074	-1.3261	-2.4832	-2.8793	-2.5755	-1.407	-1.9347	-2.4034	-2.5579	-1.5646	-2.2251	-2.2448	-2.8772	0.4925	-2.4874	0.25506	1.2587	1.5325	1.4848	-1.5719	-1.0451	1.2981	-2.5963	-2.4241	-2.505	-2.6823
-2.7912	-2.5392	-2.6035	-2.7145	-2.4407	-1.5822	-0.93523	-2.4822	-1.9918	-2.3993	0.35875	-3.1209	1.6973	-0.12857	-1.5034	0.47176	-0.011405	-2.3132	-2.1608	0.9456	-2.4376	1.4661	-1.3707	-0.20529	-0.11509	-2.1162	-2.787	-2.9716	-2.814	-2.9788	-1.9669	-2.3246	-2.4335	-2.2614	-2.2209	-2.2852	-2.1514	2.0156	-3.7409	1.4723	1.661	-2.2717	-1.3334	1.2815	1.1685	2.2188	-1.9804	-2.561	-2.1608	-2.5683
-2.702	-2.9882	-2.9405	-2.8918	-2.5195	-2.5859	-2.645	-2.6792	-2.5289	-2.7435	-1.182	-1.0161	-0.3743	2.1235	-2.1286	-0.26958	0.27787	-1.6558	-2.2665	-1.7429	-1.6424	-1.8051	-1.9544	-2.6149	-1.9161	-2.6004	-2.4666	-2.4324	-2.4988	-1.66	-1.716	-2.3899	-2.4698	-2.6419	-1.7471	-2.4625	-0.31002	-0.8388	-0.46347	1.5615	1.7118	-3.4734	-0.2561	1.3158	1.0814	1.4765	-1.5366	-2.0955	-0.64077	-1.4931
-2.8078	-3.0151	-1.5874	-2.4376	-3.2982	-2.5185	-2.899	-2.7621	-2.8264	-2.7041	-2.7466	1.1706	-3.3137	2.2178	-2.7124	-0.10679	-0.81288	-1.998	-1.8176	-1.6901	-1.6994	-3.0701	-2.5797	-3.1603	-2.5102	-2.926	-2.7787	-2.4449	-2.1193	-2.8586	-1.7471	-2.0747	-2.5734	-2.8658	-1.6631	-1.9254	-1.0503	-2.4739	1.5998	-0.64699	-2.0125	1.4516	1.7253	1.913	-1.9368	1.0348	-1.8508	-2.4345	-2.6522	-2.3733
-2.5372	-2.5797	-1.8912	-3.0535	-2.5247	-3.0317	-2.8814	-2.7725	-2.0872	-2.3184	-2.7777	-2.8886	-2.6377	-2.5226	-1.8373	-2.1183	-2.8358	-2.2852	-2.1162	-2.3536	-0.98604	-2.6574	-2.5268	-2.4915	-2.8275	-1.8622	-2.5444	-1.7813	-0.87302	-2.2261	0.040437	1.8767	-0.8585	-1.9524	1.1105	1.5905	1.8145	-1.3552	-0.70816	1.6579	-1.2484	-0.75171	0.77556	0.56093	-0.048732	-1.3904	-2.5672	-2.7134	-2.5766	-2.421
-3.0991	-3.1987	-3.4029	-3.0888	-2.8803	-3.2661	-3.1323	-3.1831	-3.1758	-3.1406	-3.1644	-3.3521	-2.4573	-3.2381	-2.9923	-3.0867	-3.1458	-3.2422	-2.7248	-2.7145	-2.7621	-2.6564	-2.7041	-2.6771	-2.9778	-1.6268	-2.6688	-1.97	-2.9322	-3.7243	-3.9307	-1.9358	0.097463	1.8736	1.7212	-2.42	0.082947	-0.15345	-0.48628	-1.183	-1.0431	-0.75897	-0.092279	-2.0737	-2.3661	-2.6056	-0.16797	-3.1022	-2.2188	-2.926
-2.8451	-3.0825	-2.4107	-2.6502	-3.3625	-2.8638	-3.2329	-3.0939	-3.1136	-3.0597	-3.097	-3.0815	-3.1458	-3.125	-2.8316	-2.9477	-3.0867	-2.4998	-2.7922	-2.6636	-1.6154	-2.0561	-3.2764	-2.7331	-3.6269	-2.3702	-2.984	-3.5419	-4.6253	-6.0707	-3.6549	-0.9456	-0.66876	1.7875	1.8953	-3.0753	0.40022	0.0031105	-0.50183	-1.5822	-2.5963	-2.3671	-2.3547	-2.5206	-2.0125	-2.0301	-2.3277	-2.4718	-0.97359	-3.4651
# Channel: Amplitude
# Width: 75.0 µm
# Height: 52.4 µm
# Value units: V
0.003635	0.0030291	0.0059429	0.0039523	0.0027118	-0.0023945	-0.0043562	0.0065198	-0.010126	0.041196	-0.08522	-0.026685	0.071401	0.029599	-0.075411	-0.032253	0.14898	0.0069526	0.0021348	0.0070968	0.009549	0.0026829	0.00054813	-0.00046158	0.0023079	0.021954	-0.020944	-0.03384	0.004385	0.049735	-0.14944	-0.036696	-0.01353	-0.03733	-0.074978	-0.17849	-0.10149	-0.077084	-0.011972	-0.0097221	0.043475	-0.042408	-0.011568	-0.0070103	-0.012665	-0.051322	-0.015405	0.010155	0.049332	-0.047514
0.0058852	0.0074142	0.006491	0.0074142	0.0075584	-0.01754	-0.0066352	0.0025964	-0.0026541	-0.0032888	0.015982	0.010991	0.0019617	0.0042985	0.0052216	0.010039	0.0035196	0.0036638	-0.0017598	-0.0022214	0.015405	0.011972	0.0021925	0.0027406	-0.0042408	-0.0039811	0.010039	0.054755	-0.045264	-0.012001	-0.054207	0.023396	-0.0017598	-0.18423	-0.068545	-0.055563	-0.083114	-0.15821	0.012578	-0.084296	-0.023108	0.013242	-0.012232	-0.0047889	-0.01754	-0.056284	-0.024781	0.02054	0.026108	-0.01728
0.0047312	0.007068	0.004587	0.0038369	-0.0036927	0.0091162	0.0084816	0.0044139	0.0016155	-0.0018175	0.011943	0.0028849	0.0017309	0.0057698	-0.0025676	0.0077027	-0.0040388	0.019588	-0.00098086	-0.00040388	0.0068083	0.020281	0.0038657	0.0042696	0.0060871	0.0039811	0.0027118	0.0025099	0.0015578	0.0013559	-0.0014136	0.0092893	-0.088883	0.039408	-0.0090008	-0.049216	-0.057294	-0.074084	-0.094999	-0.1743	-0.13821	-0.034907	-0.015319	-0.013011	-0.014598	-0.090441	-0.007443	0.0446	0.021723	-0.0095778
0.0056544	0.0077892	0.0032888	0.0042985	0.0052216	0.00095201	0.0096932	0.0064333	0.007068	0.0043562	0.0052216	0.0047312	0.0052216	0.011049	0.004962	0.006866	0.0070103	0.0042985	0.0056832	0.0068372	0.015261	0.009549	0.0087124	0.011078	-0.037446	0.0017886	0.00086547	0.004962	0.0012117	-0.0012694	0.00098086	-0.027897	0.044485	-0.05663	-0.034388	0.028243	0.0042119	-0.033349	-0.064795	-0.087181	-0.10677	-0.084931	-0.23598	0.0046735	-0.023945	-0.093615	-0.025156	0.044773	0.0064333	-0.0022791
0.010991	0.006866	0.004962	0.0046447	0.0025387	0.007645	0.0045004	0.0045581	0.0065198	0.0060871	0.0054524	0.0035196	0.0050486	0.0045293	0.0025676	0.0052793	0.00072122	0.0098952	0.0027695	0.0045004	0.0041831	0.0018463	0.0032311	0.0046158	0.00092316	-0.0031445	0.0019329	0.010703	0.010184	-0.0018175	0.012318	-0.00069237	-0.0037792	-0.01154	0.042869	-0.074372	0.026887	0.0083085	-0.010011	-0.027637	-0.054582	-0.098028	-0.11548	-0.097682	-0.19398	-0.091624	-0.038311	0.0030003	-0.00083662	-0.001904
0.0099817	0.004962	0.0051928	0.0042408	0.0033176	0.0088278	0.0042119	0.0060583	0.0067506	0.0055101	0.0038369	0.0053082	0.0057121	0.0050486	0.0033753	0.0051063	0.004385	0.0027695	0.0044716	0.0032599	0.0042408	0.0043273	0.0038657	0.0039811	0.004385	-0.00098086	-0.0021348	0.018406	0.0050486	0.0042985	0.0026541	0.0015867	-0.00014424	-0.0022214	0.0014424	-0.0064621	0.033349	-0.016675	0.0075873	-0.074113	-0.075613	-0.07945	-0.063756	-0.083517	-0.11173	-0.09823	-0.049216	-0.04988	-0.029426	-0.059861
0.0038369	0.0054236	0.0024522	0.0081065	0.0056832	0.0057409	0.0044427	0.0056832	0.0048755	0.0045581	0.0052793	0.0012117	0.0090297	0.0041831	0.0032311	-0.00037504	0.0093759	0.0047601	0.0039523	0.0057409	-0.00077892	0.00017309	0.017338	0.00092316	0.0094624	0.0037792	0.0089432	0.0071834	0.0049909	0.0039523	0.0057121	0.0045581	0.0053947	-0.019415	-0.0019329	-0.015146	0.015607	0.0082508	0.0026252	-0.029282	-0.0047312	0.0025676	-0.013934	-0.028964	-0.054726	-0.056948	-0.05738	-0.16464	-0.16294	-0.096355
0.0036927	0.0054236	0.0061448	0.0015578	0.0044427	0.0068372	0.0020771	0.012867	0.0074719	0.0030291	0.0068083	-0.0017598	0.0073853	0.0084816	0.001529	0.0026252	-0.016675	0.035398	0.0036927	0.0044716	-0.0072988	0.012376	0.0070391	0.0032311	0.0064045	0.0041254	0.0015867	0.003635	0.0037504	0.0050774	0.0033176	0.0022214	0.00080777	0.00049043	-0.0061448	-0.0085393	0.0079334	0.011366	-0.0039811	-0.0043273	0.071834	-0.084729	0.017511	-0.0073853	-0.026916	-0.036955	-0.043677	-0.064737	-0.071026	-0.11704
0.010963	0.0054236	0.004962	0.0032022	0.0035484	0.001154	0.0057698	0.00031734	0.014453	0.0044139	0.0072988	0.0044427	0.0039234	0.0050197	0.0034619	-0.0049332	0.0084816	0.012434	0.006116	0.0052505	-0.0085393	0.0075584	0.012347	0.00802	0.0041542	0.0045004	-0.0012117	0.0075584	0.0072699	0.0035484	-0.00046158	0.0076738	0.0032599	0.0040965	0.0011251	-0.0010963	-0.0073565	0.012665	-0.0064621	-0.0045293	0.018636	0.011655	-0.046331	0.048524	0.023454	-0.0032022	-0.022964	-0.036869	-0.054467	-0.06191
0.0061448	0.0063468	0.0069814	0.0060006	0.0035773	0.0039523	0.010241	0.010876	0.01252	0.010241	0.0057121	0.0071834	0.0071257	0.0093759	0.0098952	-0.038081	0.010414	0.0019329	0.0040388	0.0045004	-0.0050486	0.0096932	0.0046735	0.008395	0.0051063	-0.0066352	0.016848	0.0015867	0.0082219	-0.0020771	0.0089143	-0.00066352	0.010097	0.0030291	0.0010386	0.0063179	0.0025099	0.0036638	0.0017021	0.0038369	-0.0032022	-0.0040677	0.040994	-0.046908	0.0017021	-0.002856	0.024695	0.0020483	-0.016011	-0.02833
0.0043273	0.0043562	0.0060294	0.004962	0.0036638	0.0040965	0.0066641	0.0045004	0.0055967	0.0057986	0.0041254	0.0041542	0.0063468	0.0029426	0.0048178	0.0043273	0.0045293	0.0027695	0.0064045	-0.0021925	0.0071257	0.0096355	0.0040388	0.004587	0.0035196	0.0052793	-0.0092028	0.0060583	0.0050486	0.0091162	0.010905	0.0032599	0.0019329	-0.0087701	0.024118	0.0042119	0.0038369	0.0038946	0.0029426	0.00051928	0.0022791	-0.0022502	0.0038657	0.0042696	-0.0023368	0.038167	-0.040244	-0.025445	-0.041369	0.019358
0.0056255	0.0018463	0.0042119	0.01053	0.0062602	0.0051639	0.0013559	0.0038946	0.0067218	0.0066641	0.0027983	-0.010876	0.018492	0.0095201	0.00077892	0.0077892	0.0047312	0.007068	0.0030291	0.0051928	0.0037215	0.0034619	0.0037215	0.0048178	0.0042408	0.0049909	-0.0075296	0.003635	0.00031734	0.009924	0.016386	0.0059429	0.0035773	0.0017598	0.0052505	0.0022502	0.0047601	0.0035484	0.0039811	0.00069237	0.0025676	-0.0023945	-0.0077027	0.018867	0.0014424	0.0038369	-0.0045293	0.0010386	-0.006491	0.022589
0.0073853	0.0017886	0.0029426	0.010963	0.0036927	0.0047601	0.0034907	0.0057409	0.0052216	0.0023945	0.0057409	0.0065775	0.0061448	0.0047601	0.0046158	0.00069237	0.013213	0.004385	0.0027406	0.0031734	0.004385	0.0030868	0.008395	0.0035773	0.0051351	0.003635	0.0047312	0.0039523	-0.0054813	0.0095778	0.0012694	0.015059	0.0030003	0.0056255	0.0042119	0.003058	0.0034907	0.0028272	0.0032888	0.0057121	0.0039523	0.0050774	0.0027983	0.0018752	0.00049043	0.0041254	0.001154	-0.0032599	-0.0048466	-0.013876
-5.7698e-05	0.0027695	0.016357	0.0077892	0.0049909	0.0054813	0.004587	0.0058852	0.0030868	0.005914	0.0047889	0.0052505	0.0043273	0.0041831	0.0059429	0.0044139	0.0032888	0.0046158	0.0047601	0.0049332	0.0031734	-0.005914	0.015607	0.0051639	0.004962	0.0044716	0.00060583	0.0061737	0.0040677	0.002106	0.0050486	0.003058	0.0035773	0.0034042	0.0021348	-0.0082508	0.022214	0.0030291	0.00049043	0.0038369	-0.00040388	0.0063468	0.0067506	0.0020483	0.0058275	0.0047889	0.0045581	0.00089432	0.00095201	-0.00095201
0.0064333	0.0045293	0.0055967	0.0050486	0.0043562	0.0053659	0.0049043	0.0060006	0.0036927	0.0051063	0.0054813	0.0051928	0.0039234	0.0045004	0.0060871	0.0024522	0.0048178	-0.00037504	0.011713	0.0059717	0.0033753	-0.00089432	0.010761	0.0045293	0.0030003	0.003058	0.0042696	0.0044427	0.0044139	0.0029426	0.0037792	0.0029426	0.0044427	0.0025387	0.00060583	-0.0028849	0.016155	0.0051928	-0.0031734	0.013992	0.0025099	0.0043562	0.0017598	0.00072122	0.0048755	-0.0013847	0.01027	0.0057986	0.0049909	-0.00077892
0.0051639	0.0046735	0.0052793	0.0062314	0.0046158	-0.0015001	0.010559	0.0063179	0.003433	0.004587	-0.0023079	-0.001327	0.02031	0.0053082	0.0034907	0.0047889	0.0060871	0.0035196	0.0066352	0.0050197	0.0040677	0.0038081	0.0047312	-0.0064621	-0.0069237	0.027176	0.0047024	0.0044139	0.0032311	0.0043273	0.0056255	0.0025964	0.0042696	0.0036061	0.0010674	0.00034619	0.0083373	0.0032599	0.0037792	0.0042408	0.0030868	0.0028849	0.0027695	0.0044427	-0.0059717	0.00014424	0.020887	0.0049332	0.0043562	0.0014136
0.0051928	0.0055967	0.0030868	0.0028849	0.0069526	0.0027118	0.0066352	0.0042119	0.0043273	0.0033465	-0.0021637	-0.0023079	0.023916	0.0072122	0.0053659	0.0040388	0.0043273	0.0011251	-0.0029426	0.019011	0.0031734	0.0043273	0.0046447	0.0012117	0.0052216	0.0066641	0.0029714	0.0051928	0.0036927	0.0025964	0.0010674	0.0085393	0.0033465	0.0046447	0.0027695	0.00046158	0.0067795	0.0052216	0.003058	0.0038946	0.0042696	0.0047889	0.00092316	0.0030868	-0.00092316	0.010847	0.0079046	0.0017886	0.0037504	0.0012982
0.0047601	0.0059429	0.00023079	0.0094047	0.0048466	0.0053082	0.0023656	0.0075007	0.0018752	0.0067218	0.0038369	0.0050486	0.0083373	0.0043273	0.0042696	0.0053947	0.0036061	0.0029426	0.0072988	0.0044427	0.0048755	0.0034042	0.0036638	0.0046158	0.0017886	0.0069237	0.0064045	0.0047889	0.0041831	0.00401	0.003058	0.0049332	0.0037215	0.0040677	0.0026541	0.0029426	0.0036061	0.0045004	0.0049043	0.0053947	0.0047601	0.0033176	0.0032888	0.0037792	0.0035773	0.00046158	0.0042119	0.0050774	0.0019617	0.00098086
0.0056255	0.003058	0.0033465	0.0048755	0.0067218	0.0036927	0.0027695	0.00020194	0.014598	0.0091162	0.012953	0.0042696	0.0041254	0.0049909	0.005914	0.0036638	0.0052793	0.0046158	0.0044716	0.0044427	0.0040677	0.0043273	0.0041254	0.0044139	0.0040388	0.0051351	0.0033176	0.0045004	0.0057409	0.0039811	0.0046158	0.0041254	0.0038369	0.0036927	0.0035484	0.0032022	0.0045004	0.0045293	0.0027695	0.0048466	0.0030003	0.0028849	0.0037215	0.0032599	0.003433	0.0048466	0.0036061	0.0031734	0.0025099	0.0045293
5.7698e-05	0.021406	0.0050774	0.0044427	0.0051351	0.0055967	-0.0038946	-0.00025964	0.024925	0.0073276	0.0035196	0.0041831	0.0051639	0.0061448	0.0034042	0.0054524	-0.0063179	0.0098952	0.01327	0.0030003	0.003635	0.0042985	0.0050486	0.0035196	0.0045581	0.00401	0.0049332	0.0038081	0.0033176	0.0040388	0.0036061	0.0042119	0.0040388	0.0031157	0.0049332	-0.0021348	0.0019329	0.014107	0.0047889	0.0038657	0.0033176	0.002856	0.0015001	0.0052505	0.005337	0.0035484	0.0040965	0.0014713	0.0064621	0.00401
0.010184	0.019156	-0.0017021	0.013876	-0.0080777	0.015723	0.006866	0.0012117	0.0025676	0.0023368	0.0050486	0.0039523	0.0066641	-0.0031734	0.0038657	0.0096932	-0.0099817	0.0041831	0.009549	0.011568	0.0038081	0.0098086	0.012982	0.0022214	0.0034907	0.0049332	-0.020973	0.014886	0.025589	0.0040965	0.0047889	0.003433	0.0035196	0.0040677	0.0028272	0.0075873	0.0045004	0.0038946	0.002106	0.003433	0.0018752	0.0065487	0.0031445	0.0034907	0.0033176	0.0034619	0.00095201	0.0057121	0.0070391	0.0018175
0.0090874	0.01053	0.003433	0.0059717	-0.004962	0.016155	0.0047024	0.0049909	0.0045293	0.0039523	0.0045293	0.0043273	0.0044139	0.0031734	0.001904	-0.005914	0.037446	-0.034503	-0.01728	0.05839	-0.045004	0.027176	0.01855	0.0031157	0.0055101	0.0057698	0.0011828	0.013386	0.0077892	0.0045293	0.004587	0.0039811	0.0037792	0.0039234	0.0044139	0.003058	0.0035773	0.0033753	0.004385	0.0022214	0.0037504	0.0031157	-0.0072411	0.016675	0.0029714	0.0036927	-0.0024522	0.00075007	0.012665	0.0064621
0.0081642	0.0063468	0.0047024	0.0060871	-0.0029714	0.011655	0.0056832	0.0040677	0.0043273	0.004962	0.0038946	0.0038946	0.0032022	0.0046447	0.0046735	-0.00095201	-0.0063468	0.0016155	-0.0022502	-0.00054813	0.0013559	0.031993	0.019473	0.0060006	0.0070968	0.0040677	0.0038369	0.0043562	0.0041831	0.0045293	0.0038946	0.0034042	0.0038946	0.0054524	0.0035196	0.0018752	0.0038657	0.0029714	0.0045293	0.00401	0.0022214	0.0048755	-0.012001	0.021637	0.0028272	0.0054236	0.0053659	0.0039523	0.0029137	0.0030868
0.0040677	0.0054236	0.0056832	0.0057409	0.0047601	0.0049332	0.0048466	0.0051063	0.0029714	-0.0067218	0.015636	0.0043562	0.0047312	0.0044139	0.0053947	0.00025964	-0.0034619	-0.0035773	0.0079046	0.005337	0.0046158	0.019242	0.01252	0.0051639	0.0041831	0.0055678	0.0040965	0.0037215	0.005337	0.0039523	0.0054813	0.0051639	0.0038081	0.003058	0.0037215	0.0038946	0.00083662	0.004962	0.00075007	0.006116	0.0035196	0.0048755	0.0043273	0.0051063	0.0036638	0.0034042	0.0027118	0.0039523	0.0042119	0.0016155
0.0022791	0.0052216	0.0046158	0.0048466	0.0057121	0.0047889	0.0044427	0.0050197	-0.00083662	-0.007443	0.028647	0.0053082	0.0025387	0.0040965	0.0051351	-0.0022502	0.0094913	0.00072122	-0.0010963	0.00031734	0.0036638	0.015405	0.012895	0.0029714	0.0040388	0.0057409	0.007645	0.0023368	0.004962	0.0035484	0.0051063	0.0047889	0.0017598	0.0088855	0.0058563	0.0031734	0.0023656	0.0042408	0.0042119	0.0044716	0.0056255	0.0025099	0.0036927	0.0030868	0.0031445	0.0030868	0.0039523	-0.0043273	0.011165	0.0041542
0.015809	0.0041254	0.0057986	0.0054236	0.0056255	0.00401	0.005337	0.0041542	0.0063468	0.0011251	0.0097798	0.0042985	0.0051351	-0.00040388	0.0072988	0.0052216	0.0038369	0.0038081	0.0061448	-0.00092316	-0.0051639	0.0079334	0.015232	0.0034907	0.0038657	0.0047889	0.0044716	0.003635	0.0034619	0.0047312	0.0045293	0.0036638	-0.0067218	-0.00017309	0.020627	0.0090585	0.0043273	0.0039234	0.0031157	-0.0039234	-0.0036638	0.023339	0.0032311	0.0038081	0.0035196	-0.00043273	0.0023945	0.001904	0.004587	-0.0043562
0.0054813	-0.0031157	0.0099529	0.0052216	0.0049332	0.012145	0.0094047	0.0042408	0.0056832	0.0043562	0.0050774	0.0050774	0.0048755	0.0053659	0.0047312	0.0038946	0.0047601	0.0038657	0.0042408	0.0047024	-0.0044427	0.01102	0.0054236	0.004962	-0.0086547	0.016271	0.0036927	0.0053082	0.003635	0.0040388	0.0044139	0.0047601	-0.0015001	0.0048466	0.0075873	0.0040388	0.0028849	0.0049909	-0.0037504	0.0032311	-0.00034619	0.016069	0.0033176	0.0045004	-0.0019617	0.0024233	0.0068372	0.0044427	0.0025387	0.0015001
0.0038657	0.0012982	-0.00034619	0.0099529	0.0032599	0.0068949	0.008597	0.014828	0.0051928	-0.0071545	0.0082508	0.011453	0.00049043	0.0045004	-0.0029714	0.017627	0.010559	0.0028849	0.0063756	0.0034907	0.0041254	0.0040677	0.0042985	0.0041831	0.0050486	0.0034042	0.0047601	0.0034042	0.0036061	0.0041542	0.0022791	0.0053082	0.0045581	0.0026252	0.0038369	0.0036927	-0.00075007	0.0066929	0.0041831	0.0037215	0.004962	0.00095201	0.0029426	0.0027406	-0.0037792	-0.0037792	0.012174	0.019588	0.0039234	0.0016444
0.005337	0.007068	0.00028849	-0.0016155	-0.00077892	0.0057698	0.005914	0.019617	0.0018175	-0.0010963	0.012665	0.010905	0.0037215	-0.0060583	0.02507	-0.027003	0.017367	0.02481	0.001904	0.0045581	0.004962	0.0045293	0.0034042	0.0047024	0.0037504	0.0047024	0.0040388	0.0037504	0.0040965	0.0038946	0.0047312	0.0040388	0.0034042	0.0047601	0.0029714	0.0039811	0.0021925	0.0036061	-0.001529	0.0037792	0.0054813	0.0027118	0.0032888	0.0043273	0.0046447	-0.0049909	0.0010386	0.017915	0.012492	0.0029137
0.0057121	0.0015001	0.0067506	-0.0088855	-0.0072699	0.012578	0.005914	0.0097221	0.014915	0.0021637	0.0093182	0.0036638	0.0062891	-0.010097	-0.0045581	0.011453	0.0094336	0.021089	0.016386	0.0051639	0.0032888	0.0033176	0.0053947	0.0049332	0.0010386	0.0056544	0.0041542	0.0042119	0.003433	0.0052216	0.0042408	0.0027406	0.0064333	0.0023079	0.0036927	0.0038081	0.0039523	0.0032888	0.0046158	0.0038946	0.0022214	0.0037504	0.0045004	0.0011828	0.0049909	0.0029426	0.0029137	0.0092605	0.0043273	0.0029137
0.011597	0.0044139	0.0066641	0.0045293	-0.0054813	0.020137	0.0039811	0.0033176	0.014424	0.0053659	0.0042408	0.0045581	0.00401	0.005914	0.00014424	0.0057986	0.0077603	0.0065198	0.0024522	0.0044716	0.0049332	0.0038946	0.0059717	0.0021637	0.0045004	0.0042696	0.0046735	-0.0038081	0.013097	0.0063468	0.00401	0.0030868	0.0060294	-0.0016155	0.0049332	0.014222	0.0039523	0.0023656	-0.0016444	0.008395	0.0047889	0.003058	0.0037504	0.0029714	0.0020194	0.0053082	0.0038946	0.0031734	0.0030868	0.0033465
0.0085393	0.0067795	0.0043273	0.004962	0.0055967	0.0051063	0.0050197	0.0034907	0.004587	0.0049043	-0.0081931	0.016213	0.011251	0.0047889	0.0045004	0.0043562	0.0037792	0.0060294	0.0028849	0.00401	0.0043273	0.0039234	0.0039234	0.0035773	0.0043562	0.0051063	0.0042985	0.0013559	-0.00098086	0.016098	0.0038369	0.0042985	0.0046447	0.004385	0.0012694	-0.0021637	-0.00028849	0.0054524	0.015463	0.0076161	0.0029714	0.0036638	0.0034907	0.0038081	0.0039234	-0.0041254	0.010386	0.0051063	0.0038946	0.0027983
0.0063756	0.00066352	0.0081065	0.012665	0.0052216	0.0042696	0.0047024	0.0039523	0.0056832	0.0045581	0.0061737	0.0045581	0.0049332	0.0041254	0.0045581	0.0051351	0.0033753	-0.0019617	0.011597	0.0058275	0.004587	0.004587	0.0025387	0.0052216	0.0044427	0.0042696	0.0042985	0.0050486	-0.0078757	0.0067506	0.0028272	-0.00043273	0.012867	0.0041831	-0.0023368	-0.0022214	0.0053947	0.0028849	0.010039	0.017396	0.0038081	0.0043273	0.0029426	0.0037504	0.0032599	0.0028849	0.0030291	0.005539	0.0026541	0.0037215
0.00401	-0.0015867	0.012751	0.0050486	0.0051063	0.0051351	0.0041542	0.005539	0.00802	0.0071545	0.0045293	0.0050197	0.0037792	0.0049043	0.004962	0.0048755	0.0043273	0.0050486	0.0036061	0.0047889	0.0047889	0.0046447	0.0040677	0.004385	0.0042119	0.003635	0.0042696	0.0036061	-0.00025964	-0.0024522	0.012895	-0.00028849	0.0047601	0.0010674	-0.0057409	-0.0098952	-0.00063468	0.0047889	0.014915	0.024608	0.0036061	0.0081065	0.0039811	0.0034619	0.0045293	0.0024522	0.0015867	-0.020454	0.037734	0.0026252
0.0086835	0.016473	0.0054813	0.0053947	0.0035196	0.0053082	0.0045581	0.0058563	0.0047312	0.0038946	0.0049909	0.0049043	0.0045581	0.0042408	0.0053947	0.0042119	0.0054236	0.0035196	0.0041254	0.006116	-0.0017021	0.006491	0.0042696	0.0046447	0.03583	-0.025935	0.0048755	0.0050774	0.00086547	0.0046158	0.0047601	0.0014713	0.00060583	0.0041831	0.030407	-0.049707	0.0022502	0.0035196	0.0052793	0.013097	0.020742	0.016617	0.0067506	0.0034042	0.0035773	0.0038369	0.0028272	0.0046158	0.0019329	0.0046447
0.0040388	0.0068949	0.0052216	0.0063179	0.0038946	0.0060871	0.0038657	0.0055967	0.0001154	0.0066064	0.0063179	0.0043562	0.0032888	0.0060583	0.0053659	0.0036061	0.0041831	0.0051928	0.0038369	0.0049332	0.0047024	0.0047024	0.0048466	0.0027406	0.0044139	0.0048466	0.0034619	0.0032599	0.0036927	0.0059717	0.0042408	0.00086547	0.0027983	0.003635	-0.014107	-0.0027695	0.0020771	0.0040965	0.0042408	0.0055967	0.030464	0.016646	0.004962	0.0043273	0.003058	0.0038081	0.0034907	0.0011828	0.00401	0.0060294
0.0044427	0.0051351	0.00075007	0.010818	0.004587	-0.0052793	0.0089143	0.011857	0.0056544	0.0048755	0.0047312	0.0053659	0.0040965	0.0044716	0.0068949	0.0047601	-0.0037215	-0.00092316	0.0060294	0.01278	0.0031734	0.0054524	0.0015001	0.0065775	0.0042119	0.0048466	0.0020194	0.0059429	0.0025676	0.0042985	0.0037504	0.0032311	0.0039234	0.0029426	0.0036638	-0.0077603	-0.0024233	0.0066929	0.010241	0.0089432	0.015723	0.0021637	0.0063468	0.0014424	0.002481	0.002856	0.0027695	0.0044427	-0.01027	0.0059429
0.0060294	0.0052505	-0.001327	0.010328	0.0046158	0.0044716	0.0062602	0.0055101	0.0052505	0.0053082	0.0047889	0.0044427	0.0041831	0.0040965	0.0057986	0.0052505	-0.0047312	-0.010039	0.0019906	0.02582	0.013299	0.0049332	0.0046447	0.0047889	0.0042119	0.0044427	0.0036638	0.0040388	0.0038657	0.0043562	0.0057409	0.0017598	0.0048466	0.0034619	0.004587	0.0029137	-0.0019617	0.0088855	0.007645	0.0034907	0.0039234	0.0039811	-0.0084527	0.015146	0.0023945	0.0026252	0.0050197	0.0027118	0.0046158	-0.0057121
0.007818	0.0057698	0.010097	0.0092893	-0.00802	-0.010068	0.035455	-0.0012117	-0.0070391	0.023454	0.0092893	0.0037215	0.00075007	0.0077892	-0.0042696	0.00066352	-0.0082796	-0.026829	0.020396	-0.027522	0.0049332	0.0049043	-0.0021348	0.0085104	0.0047312	0.0044139	0.0057986	0.0047024	0.008597	-0.0020771	0.0053082	0.0032022	0.0059429	0.004385	-0.0012405	0.0081354	0.0079334	0.0025676	-0.0013559	0.0035196	0.015405	0.059804	-0.0024233	-0.051466	-0.00028849	0.00023079	0.007645	0.0046158	0.044456	0.022069
0.0093182	0.004587	0.0051063	0.0059717	0.0015867	0.0070103	0.0063179	0.0039523	0.0044139	0.0052793	0.0048466	0.0040965	0.0053659	0.0053947	0.0037504	-0.0078757	-0.00086547	-0.029484	0.012174	0.04235	0.01353	0.0047312	0.0042408	0.00401	0.0040388	0.0042408	0.0050486	0.0026829	0.0030868	0.010588	0.0037792	0.0045004	0.0034619	0.0034907	0.0043562	0.0043562	0.0048178	0.0022502	0.0047601	0.00092316	0.0035484	0.0048466	-0.0035773	0.0059717	0.0069526	0.0038369	-0.0056255	0.0094624	0.0033753	-0.010299
0.01027	-0.001154	0.011943	-0.00060583	-0.0049909	0.0042696	0.026512	0.0046447	0.0059717	0.0051639	0.0042985	0.0052216	0.0044427	0.0032022	0.0046158	-0.00054813	-0.0044427	-0.0072122	0.0063468	0.023945	0.014251	0.0041831	0.0037215	0.0044139	0.0041831	0.0044427	0.0025387	0.0071257	0.0033465	0.0048178	-0.0045004	0.013617	0.0047024	0.0030868	0.0035196	0.0040965	-0.00020194	0.0014424	-0.001529	0.00401	0.0017886	0.0074719	0.018059	0.0038657	0.0015578	0.0041831	0.0026541	0.0034042	0.0027983	0.0036638
0.0047024	0.0071834	0.0017021	-0.0072699	0.01229	0.018348	0.0026252	0.0042985	0.0016155	0.0065198	0.012982	0.0041254	0.001327	0.0072122	0.0051063	0.00083662	-0.0047024	0.00089432	0.0066064	0.016184	0.0045004	0.0051063	0.0040965	0.0051639	0.0031445	0.004385	0.0030003	0.0057698	0.003433	0.0038081	0.0045293	0.0039811	-0.0012982	0.006866	0.0033753	0.0039811	0.0025676	-0.0085104	-0.0037215	0.0015867	0.007443	0.028733	0.011366	0.0037792	0.0029426	0.00401	0.0032599	0.0030291	0.003433	0.0029137
0.0076738	0.005337	-0.00040388	0.0053659	0.0076161	0.00401	0.002856	-0.016011	-0.009347	0.037244	0.014194	0.011424	0.0051639	0.0050774	0.0041254	0.0042985	0.0046447	0.0026829	0.0029426	0.0067218	0.0045004	0.0036061	0.0018463	0.010761	0.0037792	0.0042119	0.0036638	0.00072122	0.0083085	0.0046447	0.0032599	0.0034907	0.0047024	0.0033753	0.0038369	0.0027983	0.0048178	-0.0048466	-0.00083662	0.0043562	0.0022214	0.023223	0.0032022	0.003058	0.0052216	0.0020483	0.0031445	0.0028849	0.0066064	0.0019617
0.001529	0.0061448	0.0060294	0.004962	0.0012694	0.0064333	0.0025676	-0.02631	-0.034965	0.051322	0.046764	0.0041542	0.0056832	0.0058852	0.0044427	0.0045293	0.0048466	0.0037504	0.0053947	0.0038081	0.0047601	0.0062025	0.0031734	0.005539	0.0055967	0.0020483	0.007068	0.0048178	0.0045004	0.0045581	0.0044427	0.003635	0.00401	0.0045293	0.0035773	0.0052793	-0.00046158	0.0094624	0.0040965	0.0025676	0.003433	0.004385	0.0034907	0.0040388	0.0047024	0.0031734	0.0031734	0.0043273	0.0024522	0.0034907
0.0042408	0.0059717	0.0048755	0.0057986	0.0043562	0.003635	0.0077603	-0.010501	0.022618	0.0076161	0.0052216	0.0057698	0.0042119	-0.0011828	0.011799	0.0036927	0.0047601	0.0036061	0.0049043	0.0060006	0.0046158	0.0018463	-0.0028849	0.012145	0.011107	0.0035773	0.0051351	0.0031445	0.0062602	5.7698e-05	0.010011	-0.00098086	0.012895	0.0048466	0.0047312	0.0035196	0.0042119	0.0049909	0.0032022	0.0039523	0.0026829	0.0041254	0.0022791	0.0057698	0.003635	0.0035484	0.0038946	0.0032599	0.0030003	0.00054813
0.0060006	0.0052505	0.0064045	-0.0063756	0.011395	0.016877	0.0065775	0.006866	0.0041542	0.0064333	0.0037504	0.0054524	0.0022791	0.0071834	-0.003433	0.0064621	0.012203	-0.0031445	0.011309	0.0017598	0.00080777	0.0079911	0.0028272	0.0030868	0.0024522	-0.0013559	0.0089143	0.0022214	0.0042408	0.0027406	0.0050486	0.016184	-0.038571	0.0064045	0.011886	0.03133	0.018232	0.0042408	0.0031445	0.0038081	0.0025676	0.0037792	-0.005539	0.011568	0.0048178	0.0043273	-0.0046158	0.012117	0.0016155	0.0045581
0.0067506	0.0058563	0.0067506	-0.004587	0.0038657	0.021175	0.0066352	0.0053659	0.0058275	0.0066641	-0.00095201	0.008972	0.0044427	0.0043273	0.0035196	0.0035196	0.0060871	0.0031445	0.0051928	0.0037504	0.0037504	0.0045004	0.0042985	0.0056255	0.00057698	-0.0015867	0.014569	-0.0012982	0.003635	-0.010501	0.012261	-0.021492	0.045293	-0.054294	0.010645	0.023281	0.043244	0.0087701	0.0037215	0.0035773	0.0040965	0.0046735	0.0012694	0.0045293	0.0033465	0.0037504	0.0030003	0.0023656	0.0064333	0.0036061
-0.00060583	0.012261	0.0037504	-0.0012405	0.0025387	0.012145	0.010501	0.010501	0.0036638	0.0045293	0.007068	0.0019617	0.0081931	0.004385	0.0049332	0.0031734	0.0063756	0.0043273	0.0044716	0.0013847	-0.0019906	0.013415	0.0032599	0.004962	-0.003635	0.0095778	0.0031157	0.0042408	0.0041542	-0.0040965	0.015088	0.00040388	-0.0033176	-0.029772	0.010703	0.020512	0.034532	0.0039234	0.0046447	0.0029714	0.0042119	0.0044427	0.0023368	0.0039811	0.003635	0.0054524	0.003635	0.0039523	0.0026829	0.0037215
0.0062025	0.0081065	0.0047312	0.0020483	0.0064045	0.0071257	0.0033753	0.010963	0.0057121	0.0049909	0.0066064	0.004385	0.0045004	0.0041542	0.0056255	0.0024233	0.0067218	0.0048755	0.0022214	0.0033176	0.0035484	0.0080777	0.0068949	0.0036061	0.0049909	-0.0088855	0.018492	0.0035196	0.0042696	0.0043562	0.0038081	0.00075007	-0.0048466	0.0054524	0.0073853	0.010328	0.0085104	0.0039811	0.0036927	0.0033176	0.003058	0.005337	0.0032311	0.0032311	0.0015867	0.007068	0.0032888	0.0032022	0.0043273	0.0027983
0.0037792	0.0044139	0.0060294	0.0011828	-0.00020194	0.016934	0.0077892	0.005539	0.004587	0.006116	0.00043273	0.0068083	0.005337	0.0061448	0.0019329	0.0048466	-0.001154	0.0020194	0.0044427	0.011107	0.011366	0.0046158	0.0044139	0.0044139	0.0044427	0.0035773	0.0044427	0.0035773	0.0026829	0.0037792	0.0060583	-0.0017886	0	0.0031734	0.012463	0.0090008	0.0046735	0.0033176	0.0053082	0.0032599	0.0012117	0.0046735	0.0015001	0.0012982	0.010588	0.0035196	0.0027406	-0.0068372	0.0034907	0.0063468
0.0060871	0.0062314	0.0060294	-0.00060583	0.0017598	0.0036927	0.010616	0.0051639	0.0042696	-0.0014713	-0.021319	0.029801	0.0035484	-0.0034042	0.015405	0.0043562	-0.0038081	-0.0067218	0.0064045	0.029455	0.012088	0.0037792	0.0037215	0.0042985	0.0062602	0.0037504	0.0036638	-0.00089432	0.0010097	0.0081354	0.0054524	0.0047889	-0.0018175	0.0043562	0.0075007	0.0052793	0.0025676	0.003433	0.0044716	-0.0027118	-0.00060583	-0.0012117	-0.0077603	0.0094624	0.017713	0.012607	0.0040388	-0.00054813	0.0016444	0.0048178
0.0051351	0.0047601	0.0049043	0.0064621	0.0026541	0.006116	0.0038369	0.0061448	0.0048178	-0.00043273	-0.0085681	0.017136	0.017079	0.0036638	0.0039523	0.0034619	0.0045004	-0.0064333	0.0072699	0.017454	0.0026829	0.0043562	0.0060583	0.0038657	0.0034907	-0.001327	-0.0018175	0.0088855	0.015809	0.0051639	-0.0067218	0.01327	0.00092316	-0.0010386	0.0085393	0.003433	0.0036061	0.0020771	0.0039234	0.0051351	0.0055967	-0.011107	-0.013819	0.0092028	0.020165	0.015376	0.0034907	0.0054524	0.0025964	0.0010097
0.0067506	0.0031157	0.0058563	0.0048178	0.0039523	0.0048755	0.0038657	0.0055678	0.0055967	0.001529	0.0027983	0.0012405	0.010991	0.0073276	0.010934	0.0045581	0.003058	0.0051928	0.0054524	0.0032888	0.0049332	-0.00089432	0.0080488	0.0040388	0.001154	-0.0079046	0.00014424	0.018838	0.013703	0.0044716	0.0049909	0.0020771	0.00060583	0.0027695	0.0087412	0.0047601	0.0040677	-0.00023079	0.003635	0.0053659	-0.0016732	-0.010443	0.0064621	0.00092316	0.022531	0.0093182	0.0010386	0.0052216	-0.031907	0.0077603
0.0086258	0.0049043	0.006116	0.0049043	0.0058275	0.0057986	0.0052505	0.0049043	0.0051928	0.0049043	0.0054524	0.0057409	0.0048466	0.00401	0.004962	-0.023627	-0.00025964	0.019213	0.001529	0.010732	0.0044427	-0.0056255	0.0096932	0.006866	0.0087412	-0.0012694	0.0077315	0.0025964	0.00020194	0.0017598	0.0041542	0.00098086	0.0072411	0.01252	0.0098086	0.0034042	-0.0015867	0.0070391	0.003635	0.0042408	-0.0022214	0.0025676	-0.0012982	0.0096932	0.0084527	0.0036927	0.003058	0.0037792	-0.00017309	0.00043273
0.0081642	0.0096932	0.0047601	0.0055101	0.0052216	-0.00017309	0.012376	0.0075584	0.0051639	0.0045004	0.0060294	0.0036061	0.0043562	0.0042985	0.0025387	-0.025647	0.016069	0.02481	0.001904	-0.0041831	0.011078	0.0030868	0.010588	0.0087124	0.0044427	0.0047889	0.0044716	0.0044427	0.0030291	0.00401	0.0029137	-0.00098086	0.0030291	0.010732	0.0055678	0.0051063	0.0036638	0.0049909	0.0035484	0.0041254	0.00401	0.0041542	0.0035196	0.0014136	0.0040388	0.0041542	0.0034619	0.0031445	0.0034619	0.0039523
0.014569	0.011366	0.0060871	0.0030291	0.0085393	0.0035773	-0.0042696	0.013588	0.0060006	0.0042408	-0.0026829	0.0083373	-0.0036927	0.013011	-0.0044139	-0.0093759	0.011799	0.024579	0.0025387	0.003433	0.0069237	0.010501	0.0051063	0.0033465	0.0040965	0.005539	0.0032888	0.0041542	0.0049332	0.0046158	0.0029137	0.0045293	0.0033753	0.0019617	0.0045581	0.0031734	-0.0025676	-0.00060583	0.01454	0.00092316	0.0036927	0.0041542	0.0041254	0.0049332	-0.0095201	-0.015665	0.033349	0.002481	0.003058	0.0031157
0.030407	0.015723	0.0087124	0.0081642	0.0053082	0.0056832	0.0055967	-0.024666	0.00054813	0.031243	0.0034619	0.0051351	0.0037792	0.0012694	0.01027	-0.00075007	0.0067795	0.011107	0.0046158	0.0059429	0.0034907	0.0051928	0.0051928	0.0036927	0.0031157	0.0049332	0.002856	0.0041254	0.0038081	0.0042985	0.0043562	0.0031157	-0.0023079	0.0051351	0.010588	0.0040388	0.0031445	0.0023079	0.0050197	0.0032888	0.0026541	0.0034619	0.0041254	0.0030291	0.0012982	0.0086835	0.0064333	0.0025387	0.0029137	0.0042985
0.027955	0.015665	0.0044139	0.0060583	-0.0032311	0.010414	0.0072699	0.0044716	-0.0023945	0.019848	0.0051063	0.0023079	0.010761	-0.00046158	0.0098086	0.0072699	0.003058	0.0022214	0.011915	0.004962	0.0038657	0.0050486	0.0036927	-0.0012982	0.01353	0.0045581	0.0037792	0.0032888	0.0027695	0.007443	0.0064045	0.0039811	0.0032311	0.0042119	0.00401	0.0037504	0.0042696	0.001154	0.0076738	0.0038657	0.0023656	0.0044427	0.0051351	0.0038946	0.0032888	0.0029714	0.0043273	0.0030291	0.0032599	0.0025387
0.018463	0.019415	0.0046158	0.0052505	0.0039523	0.003058	0.0087701	0.0044139	0.0054236	0.0049909	0.0037215	0.0059717	-0.0068083	0.0060871	0.016934	0.0048466	0.0054236	0.0047312	0.0023368	0.0056255	0.0035196	0.0054813	-0.005914	-0.0012982	0.0086547	0.0016444	0.027464	0.0039234	0.004385	0.0034042	0.004962	0.0037504	0.0010674	0.0063179	0.0026829	0.0044427	0.0035196	0.0019617	0.0066929	0.0033753	0.0035484	0.0035484	0.0039234	0.0015867	0.0010674	0.0051928	0.0014713	0.0017021	-0.011511	0.02758
0.0029426	0.010876	0.0059717	0.0057698	0.0046735	0.0034042	0.0018175	0.0068949	0.0076738	0.006866	0.0014424	0.0075007	5.7698e-05	0.0071834	0.0082796	0.0042696	0.0044427	0.0042119	0.005539	0.0046735	0.0045004	0.00401	0.002481	0.00080777	0.00060583	0.016357	0.0057698	0.0033465	0.0057986	0.0024522	0.0054813	0.002106	0.0029714	0.0044427	0.0038369	0.0052216	0.0035484	0.0049909	0.0031734	0.0042696	0.0032022	0.0029426	0.0039811	0.0039811	0.0042119	0.003058	0.0032022	0.0016444	0.0041254	0.0047601
0.012636	0.0038657	0.0031734	0.0076161	0.0071545	0.003433	0.0048466	0.0036927	0.0066064	0.0043273	-0.00057698	0.0054813	0.0095201	0.0083373	0.0040965	0.0054524	0.0056832	0.0029426	0.0053082	-0.0068372	0.0091451	0.01027	0.004587	0.0038657	0.0027406	0.0039523	0.0030003	0.004587	-0.00031734	-0.00043273	0.0075584	0.018463	0.0035484	0.0042985	0.0032311	0.0042696	-0.004962	0.012434	-0.0072988	0.015463	0.0031734	0.0024233	0.0038081	0.0023656	0.0032022	0.0029426	0.0029137	0.0035773	0.0040388	0.0035773
0.0041254	-0.0098086	0.0042696	0.041917	0.0065487	-0.0029714	0.00049043	0.012694	-0.01379	-0.025589	0.016675	0.017425	-0.023916	0.039811	0.021204	0.027695	-0.010703	-0.0076738	-0.0073276	-0.01177	-0.010588	0.034042	-0.022242	0.02406	0.018261	-0.010357	0.055563	0.013501	-0.077603	0.0026252	0.036263	0.037013	-0.0093182	0.016819	0.010011	-0.012809	0.0066641	0.014309	0.0051351	0.0013847	0.00092316	-0.0066641	-0.0090297	0.010991	0.047889	-0.053226	-0.035138	0.023714	0.021377	0.0039234
0.0046735	0.005539	-0.0049043	0.016819	-0.0012405	0.0093182	0.0051639	0.0056832	-0.00083662	0.0098663	-0.0053082	0.0091451	0.011482	0.0052505	0.0060006	0.004587	-0.007068	0.014655	0.0027983	0.006866	-0.0058563	0.018377	0.0038946	0.0041542	0.0046158	0.0039811	0.0040965	0.0042696	0.0051351	0.0057121	-0.00066352	0.0082796	0.0021637	0.0039523	0.0054813	0.0001154	0.0067795	0.0028272	-0.0049043	0.0075584	0.0088278	0.0019906	0.0054813	-0.011136	0.016069	-0.010155	0.0099817	0.0077027	0.0028272	0.003058
0.0057121	0.0052793	0.0057121	0.0049043	0.0055967	0.0017309	0.0057986	0.0066929	0.0074142	0.0043273	0.0055678	0.0036927	0.0049332	0.004587	0.0057986	0.0047024	0.0040677	0	0.009549	0.0035773	0.0031734	0.0072699	0.0049043	0.0034042	0.0049909	0.0040677	0.00401	-0.0015001	0.006866	0.0040388	0.0040388	0.0044716	0.0025676	0.0050774	-0.0084239	0.020685	0.0036927	0.0037215	0.00043273	-0.0014136	0.009549	-0.0032022	0.0010674	0.013876	0.0055678	-0.0045581	-0.0024522	0.014598	0.0035196	0.0031734
0.0025387	0.0094624	0.005337	0.0049909	0.0045293	0.0052505	0.0064045	0.0039234	0.0050486	0.0041254	0.0048178	0.0084239	0.0037215	0.0053082	0.0034907	0.0039811	0.0056832	0.0057409	0.0037792	0.0040965	0.0045293	0.0040965	0.0050486	0.0057698	0.0035484	0.0043273	0.0043273	0.0049332	0.0028272	0.0053082	0.004385	0.0024522	0.0047024	0.0048755	0.0037504	0.0038369	0.0047312	0.0069814	0.0046735	0.0038369	0.0032022	0.0047024	0.001904	0.006116	0.0038946	0.0011251	0.0052216	0.0018175	0.0031157	-0.0013847
0.035455	-0.0081354	0.0386	0.028676	0.030147	-0.092922	-0.0012694	0.0099817	0.00095201	0.014482	0.12561	-0.017973	0.043793	-0.0063179	-0.10787	0.11265	0.032253	-0.040013	0.052303	-0.002481	0.0059429	-0.10686	-0.015665	0.13089	0.0085393	0.0085393	-0.052274	-0.027493	-0.029945	-0.0021925	-0.0021925	-0.017627	0.013703	0.013472	0.011886	0.027608	0.019185	0.050918	-0.091364	0.0067795	-0.0014713	-0.0030291	0.0027118	-0.0012694	0.0049043	0.026281	0.082479	0.032484	-0.074286	-2.8849e-05
0.017598	0.011828	0.01252	0.0020194	0.010703	0.0049332	0.0068372	0.0064045	0.010328	-0.011482	0.0080488	0.0097221	0.0032599	0.0066929	0.0047312	0.0028272	-0.0051928	0.0018175	0.010588	0.016992	0.0047312	0.0047889	0.006116	-0.0001154	0.0060294	-0.00066352	0.010472	0.0047024	0.004587	0.0035773	0.0044139	0.0038657	0.0038369	-0.0056255	-0.00031734	0.0048178	0.010039	0.008395	0.0091739	0.0035196	0.0033753	0.0027983	0.003433	-0.0064621	0.0062025	0.0088566	0.010299	0.0046158	0.0027983	0.0037215
0.01705	0.022877	0.042264	0.017367	-0.0060871	0.012463	-0.0039234	0.01353	0.005914	0.0043562	0.003058	-0.0029714	0.0079623	0.0054524	0.0037215	0.00083662	-0.010501	-0.0020483	0.025618	0.024464	0.0001154	0.0048755	0.0037504	0.0054813	-0.0018463	0.0032022	0.0077603	0.0032311	0.0054524	0.0040388	0.0038081	0.0016732	0.003635	0.027204	-0.054611	0.0090297	0.025877	0.017857	0.0092028	0.0056255	-0.0069237	0.0048466	0.0065487	0.0055678	-0.0088855	0.0047024	0.020137	0.0023079	0.0051639	0.00401
0.0061737	0.021492	0.030436	0.013934	-0.012001	0.004587	0.03133	0.002856	0.0079623	0.0038081	0.004962	0.0059429	0.0037215	0.0052793	0.0038946	0.003635	0.0057986	-0.0051351	0.016502	0.0014713	0.0047312	0.0049909	0.0050486	0.0029137	0.0039811	0.0048755	0.0062314	-0.0064621	0.010905	0.0041254	0.0030868	0.0021925	0.0051351	-0.0081065	-0.0066641	0.017598	0.012982	0.011857	0.0021348	0.002856	0.004587	0.003058	0.0048178	0.0032022	0.0032599	-0.015838	-0.0047601	0.037763	0.0027695	0.0039811
0.0085393	0.025127	0.012145	0.0037504	0.0075007	0.00077892	-0.0016732	-0.0051063	0.014713	0.023685	0.0058563	-0.0088855	0.014338	0.0071257	0.0090874	0.006116	0.0044716	-0.0025387	0.0012405	0.011915	0.0084239	0.0045004	0.0045581	-0.0023945	0.0092028	0.0049909	0.0042985	0.0029137	0.0064621	0.0023656	0.0045004	0.0053659	0.0052505	0.0015001	0.0047601	0.0021925	0.0038657	0.0040965	0.0038081	0.0025964	0.0060871	-0.009347	0.013011	0.0033176	0.004385	0.0018752	-0.0054524	0.017973	0.0012405	0.0041831
0.0026541	0.0064333	0.00043273	0.0063756	0.0057986	0.0041831	0.0064621	0.0018463	0.00037504	0.016213	0.0044139	-0.0081354	0.020858	0.012492	0.0053947	-0.0077027	0.015723	-0.0056255	0.013876	0.00020194	0.015405	0.0035773	0.0044427	0.0019617	0.007645	0.0048755	0.0036638	-0.00043273	0.00092316	0.015953	0.0043562	0.0037504	0.0043273	0.0034907	0.0023656	0.0023656	0.0038081	0.0041542	0.0018463	0.0049909	0.0039523	0.0037504	0.00014424	0.0065198	0.0020483	0.003635	0.004587	8.6547e-05	0.0054524	0.0039523
0.0056832	0.0044139	0.0070391	0.0057698	0.0065487	0.0047601	0.0088278	0.0032888	0.0012982	0.0082796	0.0041831	0.0032599	0.0075584	0.0056832	0.0044139	0.006116	0.0054236	0.0050197	0.0090297	0.0052793	0.0091162	0.008972	0.0055678	0.0051063	0.018925	0.043937	0.03609	-0.014944	-0.0028849	0.0078757	0.0094913	0.019531	0.0080777	0.014165	0.00086547	-0.011684	0.013472	0.0013559	0.003635	0.02181	-0.030695	0.013876	0.048783	0.0023656	0.011511	-0.003433	-0.0059429	0.0047312	0.0023656	0.0027983
0.0051351	0.00063468	0.0086258	0.0047889	0.0050774	0.0072122	0.002856	0.0045581	0.0034042	0.0043562	0.0063179	0.0044427	0.0051063	0.0033465	0.0052793	-0.0093759	0.0088566	0.010934	0.0041542	0.0042408	0.0044427	0.0049909	0.0031734	0.0056544	0.0038946	0.0062602	0.0025099	0.0052793	0.00057698	-0.01679	-0.0020194	0.016963	0.025647	0.0032888	0.0056544	-0.00046158	-0.0083662	-0.0050197	-0.0041254	-0.0020771	0.020598	0.028791	0.0087412	0.0050486	0.0020194	0.0034619	0.0036638	0.00066352	0.0055678	0.0038657
0.0056544	0.0014136	0.012867	0.005539	0.0050486	0.0045293	0.0059429	0.0042119	0.0057986	0.0054813	0.0045581	0.0043273	0.0052216	0.0040388	0.0047889	0.0022214	0.0025964	-0.0057698	0.014973	0.0034042	-0.0031157	0.0084816	0.0061448	0.0042696	0.0043562	0.005539	-0.0032022	0.0084527	0.0025099	-0.010559	-0.007645	0.020021	0.016934	0.0039811	-0.00014424	-0.023541	0.0054813	-0.0055967	-0.001529	0.0082508	0.019646	0.023771	0.013819	-0.0046735	0.0094913	0.0062025	0.0032311	0.0032599	0.0036638	0.0032599
0.0058852	-0.0021637	0.014021	-0.004587	0.012318	0.0044716	-0.00014424	0.0075584	0.0047024	0.0059717	0.0045004	0.0047889	0.0056255	0.0058275	-0.010472	0.021492	0.0037215	0.0042408	0.004962	0.0042985	0.003058	-0.0055678	0.013992	0.0049909	0.0035196	0.0053082	0.0034042	-0.0012694	0.0093182	-0.0077027	0.0022502	0.015896	0.0090297	0.0023945	0.0060294	-0.0041254	-0.014338	-0.0074719	0.004962	0.017742	0.020252	0.017656	0.0036061	-0.00020194	0.0054236	0.0039523	0.00069237	0.0038946	0.0034619	0.0035773
0.0048178	0.0037792	-0.007068	0.017684	0.0053082	0.0017598	0.0049332	0.012001	0.0055101	0.0042696	0.0063468	0.0034042	0.0043562	0.0070103	-0.019733	0.032224	0.0033465	0.0050774	0.0048755	0.0020771	0.0064621	0.0062891	0.0021348	0.0032022	0.0035773	0.0052793	0.0044716	-0.0036638	0.012492	0.0060871	0.0017309	-0.0024233	0.0034907	0.0041254	-0.0065487	0.0049332	0.0038369	0.0072411	0.011366	0.010184	0.0021637	0.0033465	0.0038946	0.0040965	0.0032022	0.0026829	0.0034907	0.0038657	0.0023368	0.0029714
0.026108	0.0062025	0.0047024	0.0066929	0.0033753	-0.0060006	0.0074142	0.013213	0.014194	0.0045004	0.0048755	0.0052505	0.0053659	0.0047312	0.0054524	0.0042985	0.00401	0.0056255	0.0038369	0.0050486	0.0047601	0.0043273	0.0047312	0.0035773	0.0049909	0.0040965	0.0044427	0.0041831	0.0046735	0.0047024	0.0048755	0.0041254	0.0038946	0.003058	0.0044427	0.0041254	0.0017886	0.0045581	0.0045004	0.00046158	0.0041831	0.0029714	0.0039811	0.0054524	-0.0039811	0.0040965	0.0058563	0.0039811	0.0026829	0.0033753
0.015723	0.035311	0.0054813	0.0056255	0.0058563	0.00060583	0.0067506	0.012347	0.0038369	0.0053082	0.0051351	0.0052505	0.0047024	0.0054524	0.0010674	0.01128	0.0038946	-0.0018752	0.012549	0.0040388	0.0046735	0.0025676	0.0053947	0.0048755	0.0044427	0.0042985	0.0036061	0.003433	0.00072122	0.011943	0.00089432	0.0029137	0.0029426	-0.0065775	0.022733	0.0031734	0.0036638	0.0044139	0.00401	0.0029714	0.0034042	0.0030003	0.0026252	-0.0018175	0.012924	0.00401	0.0034042	0.0037792	0.0043273	0.0027695
0.056082	-0.043879	0.06892	0.0053659	0.0047889	0.005539	0.0060583	0.0045581	0.0053659	0.00089432	-0.0018752	0.013097	0.0048755	0.0050774	0.0056832	-0.00025964	0.0067218	0.014511	0.0057986	0.0049043	0.003635	0.0037792	0.0047312	0.005337	0.0046447	-0.0036638	0.0051639	0.0044139	0.0050197	0.0030291	0.0037215	0.0048178	0.0032599	-0.00017309	0.0086835	0.0045004	-0.0025676	0.0083373	0.0018752	0.0068372	-0.00060583	-0.010011	0.0072988	0.029166	0.0033465	0.0021925	0.0032311	-0.0047312	0.0099529	0.0032311
0.0073853	0.010789	0.040965	0.013646	0.0042119	0.0051063	-0.0012982	-0.0072988	0.021002	0.0077892	0.001529	0.015896	0.0052793	0.00401	0.0041542	0.0056832	0.0052793	-0.00069237	0.0029426	-0.0081065	0.0032022	0.019098	0.014655	0.0038081	0.0050486	0.0019906	-0.00080777	0.0073565	0.01154	0.0036061	0.0049332	0.0035196	0.0037215	0.0038657	0.003635	0.0040388	-0.0039523	0.0089432	0.0041831	-0.009549	0.0001154	0.00086547	0.003635	0.016963	0.01304	0.0026541	0.0035484	0.0042408	0.0029426	0.0021637
-0.036552	0.010876	0.02507	0.017425	0.0010097	0.0072411	-0.00077892	-0.012261	0.034359	0.0066929	0.0032022	0.0045293	0.007068	-0.0047312	0.00092316	0.011626	0.0032599	0.013184	-0.019329	-0.036205	0.070218	-0.052563	0.036523	0.035628	0.0015867	-0.0019329	0.0017598	0.0081354	0.016386	-0.008597	0.01379	0.0033753	0.0020194	0.0049043	0.0039523	0.0044716	-0.010645	0.012001	0.0045293	-0.0035484	-0.0082508	-0.00017309	0.0050197	0.010847	0.025704	0.002856	0.0031157	0.0054813	-0.0051928	0.0061737
0.0053947	0.0066352	0.0017598	0.0019329	0.01128	0.0039234	0.0042408	0.0049043	0.0087989	0.0044427	0.0044139	0.0036927	0.0048178	0.0038369	-0.012434	0.020973	0.005337	-0.0021637	-0.0038081	-0.019271	-0.0025676	0.0081065	0.020915	0.040013	0.0036638	0.0035773	0.0031157	0.0047312	0.0038369	0.0020194	0.0028849	0.0071545	0.0041542	0.0049909	-0.0060871	0.0076161	0.0086258	-5.7698e-05	0.0042696	0.0048178	-0.011713	-0.0075584	0.0072988	0.013588	0.024522	-0.0048466	0.0076161	0.0032311	0.004385	-0.0017886
0.0031157	0.005337	0.0056832	-0.002106	0.0049909	0.01203	0.008972	-5.7698e-05	0.0078757	0.0048178	0.004962	0.00069237	0.0066929	-5.7698e-05	-0.0061737	0.016502	0.0072699	0.0049332	0.00017309	-0.0098952	-0.003058	0.0048178	0.021492	0.018809	0.0050774	0.0026829	-0.0014424	-0.0017886	0.018867	0.0096644	-0.0033753	0.01705	0.0036638	0.0038946	-0.0059717	0.0028272	0.015175	0.0050774	-0.0022791	0.0069237	-0.0019906	-0.013386	0.010414	0.019819	0.0020771	0.0027406	0.0045004	0.003635	0.0034907	0.0056832
-0.00060583	0.0089432	0.0045004	0.0058563	-0.0066352	0.013934	0.0037792	0.0066064	0.0047601	0.0058563	0.0045004	0.00086547	0.0062891	-0.0047601	-0.020685	0.034128	0.015867	0.0057698	0.0038657	0.005914	0.0050197	0.00060583	0.0058563	0.0019617	0	-0.014222	-0.0048466	0.00028849	0.014684	0.025387	0.017194	0.0030291	0.003058	0.0038081	0.0053947	0.0039811	0.0025676	0.0033465	0.0027695	-0.0060871	0.0027695	0.00802	0.016155	0.0081931	0.0032599	-0.0012405	0.0076738	0.0020483	0.0029426	0.0010386
0.00060583	0.004587	-0.00054813	0.013963	0.0072988	0.0025964	0.0039811	0.0041831	0.0051351	0.0047024	0.0056544	0.0034042	-0.0060871	0.01177	-0.013011	0.014886	0.023223	0.0049332	0.0031734	0.0051063	0.0042985	0.0058275	0.0014136	0.0061448	-0.0028272	0.0046158	-0.025127	-0.00095201	0.013444	0.022964	0.026483	0.0045293	0.0045004	0.0033176	0.0052793	-0.0033753	0.0066064	0.0047601	0.0024233	-0.0019329	0.011049	0.0065775	0.0045581	0.0025387	0.0034907	0.0042696	0.0053082	0.0023656	0.0023368	0.0033176
0.0067795	-0.0052505	0.0098086	0.0055678	0.01128	0.0060006	-0.0029137	0.0098086	-0.0010097	0.016155	0.0031445	0.0072122	0.005337	0.0060583	0.0060294	0.0083662	0.0059717	0.0055967	0.0053082	0.0035196	0.0049043	0.0041542	0.0044427	0.0043273	0.0046447	0.0044139	-0.0078757	0.0078469	-0.012145	0.024493	0.0039811	0.0018463	0.0046158	0.0044716	-0.0032599	0.018492	5.7698e-05	0.0053082	-0.0071545	0.003635	0.016213	0.0020771	0.0031734	0.0038369	0.0046735	0.00017309	0.003635	0.00023079	0.010011	0.0040965
0.0066352	0.0054236	0.0043273	0.0042985	0.0060871	0.0036061	0.0064621	0.0028849	0.0064045	0.0026541	0.0038657	0.0027118	0.0041254	0.00063468	-0.013242	0.0057409	0.02507	0.016386	0.0028849	0.014771	0.0037504	0.0041542	0.0035196	0.0047312	0.0038081	0.0045004	-0.00031734	0.0046158	0.010241	-0.0068372	0.010068	0.0053082	-0.0023368	-0.0025387	0.0052793	0.01754	0.0025964	0.0034042	0.0044139	0.0030291	0.0021925	0.0037792	0.0053659	-0.0012694	0.0010097	-0.0073276	0.01027	0.013126	0.0064333	0.0050486
0.0025387	0.0065775	0.005539	0.0040677	0.0068949	0.0039523	0.0057698	0.0058852	0.0024233	0.0036927	0.0050774	0.0052216	0.0060871	0.018665	-0.035282	0.019358	-0.031561	0.03283	0.02256	-0.00034619	0.012665	0.005914	0.0052505	0.0041254	0.0035773	0.0042696	0.0047601	0.004587	0.0038946	0.0018175	0.0051639	0.0034907	-0.0090297	0.0042696	0.0045293	0.02256	0.0054813	0.0056255	0.0014136	0.0020771	0.0042119	0.00089432	0.0035196	0.0046447	-0.00028849	0.00092316	-0.0048755	0.0046735	0.013386	0.0043562
0.0066352	0.0039523	0.0036638	0.0061737	0.0060294	0.0038081	0.0045581	0.0048178	0.0032022	0.0058852	0.0051639	0.0038657	-0.0081354	-0.011886	-0.0050197	-0.0030868	0.012232	0.033724	0.020627	0.0016155	0.0057986	0.0041831	-0.0033753	-0.0083373	0.020713	0.012117	0.0045293	0.0051639	0.0023656	0.002481	0.0023945	-0.0038369	-0.012636	-0.0025099	0.011655	0.034994	0.012895	0.0030291	0.0040677	0.0046158	0.0038657	0.0025387	0.0041831	0.0035773	-0.0078469	0.013011	0.0001154	0.0072699	0.0023945	0.0032888
0.0020771	0.0072699	0.0049332	0.005539	0.006491	0.0045004	0.0049043	0.004962	0.0048755	0.0049909	0.0036927	0.0026829	-0.012203	0.0036638	0.00092316	0.0086835	0.018896	0.02155	-0.0011828	0.0066641	0.0035484	0.0034042	-0.0046735	-0.029974	-0.0060583	0.046129	0.020108	0.0051351	0.0047889	0.003058	0.0027406	0.0055967	-0.0027695	-0.0073276	0.0098375	0.025387	0.0043562	0.0033176	0.0033176	0.0030003	0.0041831	0.0044427	-0.0077892	0.010905	0.0085681	0.00057698	0.0051639	0.0020483	0.0027695	0.0017309
0.0036638	0.0040965	0.0049043	0.0048178	0.0050197	0.0065775	0.0048178	0.0045581	0.0055967	0.0042985	-0.0021348	0.01278	-0.0010386	0.01177	0.0042985	0.0044427	0.0034619	0.002856	-0.0065487	-0.0011251	0.0079911	-0.00051928	0.011828	-0.029368	-0.00051928	0.00046158	0.071026	0.0042696	0.00401	0.0048178	0.0047312	0.0037215	0.0037504	0.0041542	0.0046447	0.0020771	0.0058275	0.0046735	0.0035196	0.0033465	0.0040388	0.0028849	0.0048178	-0.0071545	0.011049	0.0040677	0.0037504	0.0025964	0.0022502	0.0035196
0.0059429	0.0045004	0.0042985	-0.00031734	0.010097	0.0052505	0.0038081	0.002106	0.0051928	0.0044427	-0.0053659	0.017627	0.0025964	0.0069814	0.0033176	0.0045293	0.00046158	-0.0052505	-0.012347	0.0026252	0.025185	0.016357	-0.012607	-0.028791	-0.010184	0.031445	0.054322	0.0047024	0.0037504	0.0045004	0.0034619	0.0041831	-0.0036638	0.011222	0.0022214	0.0042119	0.0046447	-0.0015867	0.0019617	0.018608	0.0028849	0.0042985	0.0032888	-0.0030868	0.0092893	0.0030003	0.0043273	0.0029426	0.0033753	0.0037504
0.0020194	0.0010097	0.0059429	0.0092028	0.010934	0.0010097	0.0059429	0.0044427	-0.002856	-0.0019617	0.0023945	0.01154	0.017627	0.0043562	-0.016646	0.021348	0.0039234	-0.0021348	-0.015232	-0.0021637	0.029484	0.014309	-0.011222	-0.019444	0.0021637	0.033032	0.031849	0.0048755	0.0052793	0.0027118	0.0042985	0.0032599	0.00051928	0.0063179	0.0038657	0.0029426	0.0038081	-0.0061737	0.0090585	0.018579	0.0032022	0.003058	0.0040388	0.0036927	0.0030003	0.0034042	0.0032888	0	0.005337	0.0017021
0.0042985	-0.0032888	0.0036927	0.0021925	-5.7698e-05	0.017425	0.014569	0.0056255	-0.0037792	-0.00069237	0.015434	0.0055967	0.0080488	0.0035484	-0.0076738	0.015175	0.0039523	0.0024522	-0.012953	0.0022214	0.022416	0.0089432	-0.0082508	-0.014973	0.010241	0.035571	0.013963	0.004385	0.0038081	0.0055101	0.0022502	0.0045004	0.0034907	-0.0075584	0.023743	0.0015578	0.00049043	0.0098086	0.0025676	0.0034619	0.0038081	0.0023368	-0.0027406	-0.00066352	0.0092893	0.0027406	-0.0042696	0.016905	0.0025387	-0.00083662
0.007068	0.00098086	-0.0017309	0.001154	-0.010184	0.00083662	0.015521	0.026195	0.019358	0.0047601	0.0057409	0.0045581	0.0038369	0.0060294	0.0011828	0.0020483	0.0076161	0.0051063	0.0014424	0.0017021	0.017482	0.0066352	0.0044139	-0.016271	0.0043273	0.017107	0.0094624	0.0039523	0.0033465	0.0048466	0.0015578	0.0035773	0.0033753	-0.012924	-0.00072122	0.035138	0.0045581	0.00401	0.0049043	0.0045004	0.0031157	0.0033465	0.0033753	0.0038081	0.0036061	0.0038081	0.0074142	0.0060583	0.0029714	0.0020483
0.0044139	-0.0023368	0.0081065	0.0035484	-0.0068949	-0.0087124	-8.6547e-05	0.024897	0.022819	0.0051063	0.0059429	0.0026829	0.0033753	-0.016473	0.0088566	0.0082508	0.026714	0.0038946	0.0075873	0.0055967	0.0037215	0.0036638	0.004385	-0.0033753	0.008972	0.0082796	0.003635	0.0024233	0.0065775	0.0024522	-0.004962	-0.012982	0.0054524	0.026426	-0.0083662	0.0035773	0.02556	0.0066929	0.0029426	0.0017309	-0.00051928	0.016155	0.0030003	0.0032599	0.0033176	0.0038369	0.0042408	0.0037504	0.0029426	0.0025099
-0.010501	-0.006866	0.015578	0.029397	0.0084239	0.0062025	0.0065198	0.0070103	-0.0020483	0.0081642	0.0055678	0.0041542	-0.0077892	-0.012982	0.002856	0.016098	0.030926	0.0087701	0.0053082	0.0048755	0.00401	0.0045581	0.0047312	0.0024233	0.00028849	0.0067218	0.0053947	0.0036061	0.0018463	-0.0026252	-0.0031734	-0.0065198	0.0079911	0.031878	0.0050774	0.0067795	0.0085393	0.0089432	0.0037504	0.0034042	0.0036638	0.0030868	0.0057409	0.0030291	0.0035196	0.0036638	0.0045581	0.0033176	0.0031157	0.0038369
-0.008395	-0.0030291	0.0041542	0.039263	0.0094624	0.0054236	0.0042985	0.0044716	0.0050774	0.0055967	0.00072122	0.0062891	0.004587	-0.004385	-0.00040388	0.015319	0.018983	0.0092028	-0.003058	0.0077315	0.0099529	0.0036061	0.0037792	0.0044716	0.0051639	0.0038946	0.0047312	0.0011828	0.0058275	0.0054813	-0.0071834	0.020713	0.0053659	0.002856	-0.0055967	0.011366	0.01027	0.0068949	0.0032311	0.0044716	0.0042985	0.0034619	0.0054813	0.0029426	0.0030868	0.0032311	0.0013847	0.0048466	0.0034619	0.0012405
-0.014915	-0.0037792	0.014107	0.04636	0.0012405	0.012347	0.0053659	0.0015867	0.0096932	0.0026252	0.0077315	0.0051351	0.0045293	0.0045581	0.0031734	0.0072122	0.0072699	0.00401	-0.00034619	-0.0013847	0.016761	0.0051639	0.004385	0.0039523	0.0036638	0.0062602	0.0024233	0.0047312	0.0049909	0.00077892	0.008597	-0.00057698	0.0063179	0.0041831	0.0044139	0.0057986	-0.0063468	0.0052216	0.0052505	0.0032888	-0.003058	-0.0039523	0.012174	0.020685	0.0025676	0.0033753	0.0066929	0.0026541	0.0037792	0.0027118
-0.015521	-0.0095778	0.020598	0.038657	0.0066929	0.0038657	0.0055967	-0.0048755	0.01177	0.012838	0.005539	0.0047312	0.0049909	0.0042696	0.0040965	0.0051928	0.0042985	0.0043273	0.005914	-0.0056544	0.012549	-0.013242	0.009549	0.020396	0.0037215	0.0050197	0.0037215	0.0036927	0.0020483	0.0090585	0.0026829	0.0045004	0.0031734	0.0042696	0.0042408	0.0034907	0.0040677	0.0038081	0.0038657	-0.016905	-0.010357	0.00049043	0.014511	0.030811	0.0080777	-0.00069237	0.011309	0.0045581	-0.0070968	0.015376
-0.011165	-0.0011251	0.034619	0.0042985	0.0072988	-0.0018752	0.010299	0.00095201	0.017223	0.0050774	0.0053082	0.0051351	0.0046447	0.0052505	0.0046158	0.0032311	0.0047601	0.005539	0.0050486	0.0044139	0.0055678	-0.010184	0.0092316	0.019502	0.0044427	0.0049909	0.0040677	0.0040965	0.0045293	0.0036927	0.0039523	0.0035484	0.001904	0.0051063	-0.0048466	0.0098375	0.0028272	0.0011251	0.0032311	-0.016963	-0.017944	0.00080777	0.016386	0.042177	0.012318	0.0037215	0.0030291	0.0033465	0.0037792	0.0021348
0.011078	0.0068949	0.0041831	0.0061737	0.0072988	0.0056544	0.0048178	0.0048755	0.0046447	0.0057409	0.0040388	0.0056832	0.0050197	0.0041831	0.0056832	0.0036927	0.0032311	0.0027695	0.0054524	0.0034619	-0.012867	0.030955	0.0047889	0.0042119	0.0036927	0.0042696	0.0043273	0.0047024	0.0044716	0.0042696	0.0034907	0.0010674	0.0057121	0.0047312	-0.00040388	0.0032599	-0.0012982	0.008395	0.0036927	-0.014973	-0.015694	0.0021348	0.016848	0.030003	0.018579	0.0029426	-0.0073565	0.012405	0.0030003	0.0044716
0.0063179	0.0046158	0.0053082	0.0023079	0.0066064	0.0048466	-0.0023079	0.0089432	0.01027	-0.00063468	0.0037792	-0.0019329	0.011395	0.025877	0.0042408	0.0056544	0.0042696	0.005539	0.0040965	0.0012694	0.0082219	0.0037504	0.0042985	0.0045293	0.004385	0.0045004	0.0037792	0.0048466	0.0050774	-0.0015578	0.00401	-0.0016155	0.01353	0.0034619	0.0053659	-0.001529	0.0064621	0.0043562	0.0020483	-0.0069237	-0.0013847	-0.0012694	0.016963	0.023483	-0.0026252	0.0080488	-0.0081354	0.017252	0.0020771	0.0043273
0.0041254	0.0065198	0.0028849	-0.0012694	0.0082508	0.007068	0.00037504	0.01102	0.0030868	-0.0017598	-0.0081354	-0.0020771	0.01379	0.028214	0.0038657	0.0038081	0.0066641	0.0029137	0.0044716	0.0063756	0.011136	0.0047024	0.0075584	0.0042696	-0.0018752	0.010559	0.0051639	-0.00080777	0.0055678	0.0092893	0.0049332	0.0032599	0.0047312	0.0034907	0.0038369	0.0020771	0.0062891	0.003635	-0.0035196	0.0086835	-0.0010386	-0.0048178	0.016444	0.0088566	0.0088566	0.002856	0.0032311	0.0026829	0.0030291	0.0035484
0.0053659	0.0053082	-0.0074142	0.0083085	0.0032888	0.016617	0.0065198	0.0052505	0.0040677	0.0054236	-0.0057698	-0.0087701	0.015405	0.021579	0.0051351	0.0050774	0.004385	-0.0098663	0.0018175	0.004587	0.014338	0.018406	0.0032599	0.0048178	-0.0056544	0.014511	0.0042408	0.0046158	0.0044716	0.0047601	0.0032311	0.0061448	0.0051063	0.0030003	0.0056832	0.0045581	0.0041254	0.003433	0.003433	0.0042119	0.0020771	-0.00049043	0.0044139	0.0032311	0.0033465	0.011972	0.0033465	0.0044427	0.0045293	0.003433
0.0058563	0.0049043	0.0043562	0.00069237	-0.0047889	0.0075296	0.011597	0.0069814	0.0030868	-0.008395	-0.008395	-0.030234	0.013415	0.048437	0.023973	0.0038946	0.0048755	-0.00049043	-0.020656	0.00037504	0.028301	0.020656	0.0041254	-0.00037504	0.010847	0.0036061	0.0051063	0.0048178	0.0041254	0.0027695	0.0039234	0.0038657	0.0047889	-0.0013847	0.015376	0.0046735	0.0038657	0.00401	0.0035773	0.0046447	0.0042119	0.0032888	0.0036927	0.00051928	0.0080777	0.0067218	0.0043562	-0.0019329	0.0064333	0.00017309
0.0044139	0.002481	0.0035773	0.0047024	0.0050486	0.0063179	0.0050774	0.0043562	-0.0010386	-0.022156	-0.01578	-0.0033753	0.013357	0.038398	0.034619	0.0067218	0.0025099	0.00040388	-0.0027406	0.023425	0.0070103	0.0041542	0.0056255	-0.0010963	0.0077892	-0.0016444	0.0073853	0.0047889	0.0034042	0.0052505	0.00083662	0.0052505	-0.010559	-0.015117	0.014136	0.024579	0.020685	0.0035196	0.0037792	-0.0027406	0.0092605	0.0032599	0.0028849	0.0039523	0.0026829	0.0036061	0.0014424	0.0079911	0.0025099	0.0050774
0.0053947	0.0048466	0.0056255	0.0037792	0.0014136	0.0046735	0.004587	0.0048178	0.0010674	-0.02155	-0.01529	-0.0010674	0.012549	0.046533	0.026483	0.0051928	0.0044139	0.0046735	0.0048178	0.0016444	0.0071257	0.0070103	0.0044427	0.0048178	0.0046158	0.0042985	0.0027983	0.0038946	0.00017309	0.00072122	0.011857	0.0054813	-0.0053082	-0.009549	0.0054813	0.028733	0.0030291	0.0034907	0.0020194	0.0054813	0.0031734	0.0049043	0.00046158	0.0021637	0.0039523	-0.0015867	-0.0047889	-0.011943	0.010789	0.025185
0.0047889	0.0043562	0.0058563	0.0034042	0.0055967	0.0069526	-0.0097509	0.011366	0.0025387	-0.0070391	-0.010357	-0.0043273	0.0067795	0.042062	0.017079	0.0041254	0.00072122	0.005337	-0.0027695	-0.0048755	0.020425	0.0034042	0.0017021	-0.0076738	0.0057698	0.019502	0.012088	0.0055967	0.0051351	-0.0053082	0.013126	0.0017309	0.0060871	0.0056832	0.0036638	0.0040965	0.0044427	0.0039811	0.0047601	0.0010097	0.0045581	-0.00057698	0.0040965	0.0057986	0.0019617	-0.0092316	0.0094913	-0.018175	0.0071834	0.01578
0.0098952	0.021117	0.0062602	0.0068372	0.0046735	-0.0049332	0.013905	0.0041542	0.0041542	-0.0073565	0.012809	0.0025676	-0.0030868	0.024983	0.005337	0.0047312	0.0055678	0.0051928	0.00075007	0.0012982	0.0079911	0.0028272	-0.0049332	-0.022618	-0.0014136	0.020685	0.034244	0.014828	0.0061448	0.00095201	0.0036061	0.00049043	0.012174	0.0034907	0.0042696	-0.0021637	0.0092605	-0.0039811	0.012405	-0.00089432	0.010328	0.0031157	0.0034042	0.004385	0.0023945	0.0031157	0.0022502	0.0044716	0.0014713	0.0050197
0.0094047	0.017136	0.019386	0.0053082	0.0052216	0.0051639	0.0057121	0.0047024	0.004587	-0.0016732	0.0014424	0.026829	0.0043562	0.0042408	0.0034907	0.0070968	0.00802	-0.0035484	0.011597	0.0032599	-0.014222	0.018002	0.0038946	-0.023598	-0.0043562	0.013213	0.022127	0.011309	0.0034042	0.012492	0.0032888	0.0051063	0.0043273	0.0038946	0.0017021	0.0050197	0.0038657	0.0040965	0.0049332	0.0051351	0.0041542	-0.00051928	0.00802	0.0026252	0.0027406	0.0044427	0.0050486	0.0041831	0.0033465	0.0028849
0.0068372	0.0057121	0.010386	0.0043562	0.0074719	0.0066929	0.0043562	0.0057409	0.065025	0.035311	-0.0066352	0.0087412	0.0057698	0.0054236	0.0068083	0.0012982	0.0076738	0.0099817	-0.0015578	0.0062602	0.0077603	0.00401	-0.004962	0.0068372	-0.02005	-0.039321	-0.00034619	0.0025676	0.0046735	0.0054236	0.0061448	0.0027695	0.0047889	0.0025676	0.0043562	0.0054813	0.0031157	0.0030291	0.007818	0.0026541	0.0033753	0.0027695	0.0056255	0.0045293	0.0051063	0.0034619	0.003635	0.0023656	0.0039234	0.0025099
0.050803	0.0049332	0.0036927	0.0067506	0.0039811	0.0042119	0.0057698	0.0050486	-0.0026829	-0.013069	0.016761	0.029801	0.0030291	0.0058275	-0.0044427	0.0033753	0.012665	0.0051351	0.0051063	0.0051351	0.0031445	0.0043273	0.00023079	-0.014684	-0.007818	-0.0027118	0.045725	0.0059717	0.0054813	0.0013847	0.001154	-0.00057698	0.014251	0.014742	0.0026829	0.0038946	0.0042696	0.0017309	0.0035773	0.002481	0.0034619	0.0050774	-0.005539	0.015232	0.0028272	0.0037215	-0.0061737	0.013386	0.0032888	-0.004587
0.002106	-0.0025099	0.010328	-0.010443	0.018319	0.01353	0.0049909	0.0053947	-0.0030868	-0.0092316	0.020194	0.023281	0.0029714	0.004587	0.0047889	0.0053082	0.0047312	0.0045293	0.0051351	0.0048755	0.0036061	-0.0027406	0.0090874	-0.0014713	-0.0015867	0.016559	0.004587	0.0042696	0.0026829	0.0039523	-0.0042119	-0.0163	0.0046735	0.035138	0.016588	0.0046447	0.0040388	0.0046447	0.0045581	0.0026829	0.0045581	0.0027406	0.0043562	0.0032022	0.0041542	0.0035196	0.0044427	0.0030868	-0.0026541	0.00098086
0.0039234	-0.0020771	0.0046735	0.011165	0.0091451	0.0060294	0.0042985	0.00075007	0.0010674	0.0027406	0.0074142	0.020281	0.0053947	0.0038657	0.0044427	0.0053659	0.0049332	0.002481	0.0064333	0.0035196	0.0054813	0.0038657	0.0027118	0.0030291	0.003058	0.0041254	0.004385	0.0053082	0.0027983	0.0042985	-0.00025964	-0.018752	0.0083373	0.031474	0.011453	0.004385	0.0018463	0.0038369	0.0094624	0.005539	0.0046447	0.0042696	0.0034042	0.0038946	0.0018752	0.0046158	0.0040677	0.0026252	0.0038369	0.0043273
0.014049	-0.0012982	0.010184	0.0075584	0.0036927	0.0080488	0.0069814	0.0013847	0.010645	-0.0025676	0.0027695	0.013415	0.00089432	0.007818	-0.0033465	0.0090874	-0.0013559	0.0050774	0.0018175	-0.012809	-0.0021925	0.015088	0.032801	0.012722	0.0040965	0.0041254	0.0057121	0.0051928	5.7698e-05	0.0057409	-0.0039234	0.0060871	0.012665	0.010818	0.0037504	0.0052505	0.0052793	0.0044716	0.0038369	0.0050774	0.0027695	0.0049909	0.0050774	0.003058	0.0034619	0.0042985	0.0020771	0.005337	0.0024522	0.0040677
0.0066064	-0.0075296	0.016473	-0.0060583	0.0023656	0.0087989	-0.014136	-0.00034619	0.045668	0.0040965	0.0028272	5.7698e-05	-0.0051351	0.020338	-0.0056832	0.010732	-0.0023945	0.01027	0.0023656	-0.0084816	-0.012463	0.012838	0.025531	0.01578	0.0032888	0.0025964	-0.0060006	0.0049043	0.017886	0.01679	0.0047024	0.0023368	0.0051351	0.0030003	-0.001529	0.0048755	0.0094624	0.0011251	0.0055101	0.0043562	0.0039234	-0.0026541	-0.0015867	0.020829	0.0058852	0.0025099	0.0063468	0.0031734	-0.0049043	0.013992
0.0057698	0.0039234	0.0049909	0.0051639	0.0038946	0.0031157	-0.0095778	-0.00066352	0.031705	0.012318	0.0042985	0.0061737	0.0037792	0.0042119	0.00020194	0.0065775	0.0051928	0.0025387	-0.00043273	-0.00014424	-0.0021925	0.0092893	0.012982	0.0065198	0.0052505	0.0057409	-0.0062314	-0.0075296	0.01154	0.028243	0.0047024	0.0019329	0.0051351	0.0058852	0.0042119	0.0030291	0.0049043	0.0044139	0.0032599	0.0047024	0.0018752	-0.0087989	0.0034042	0.020425	0.0053082	0.010588	0.0032311	0.003058	0.0036927	0.0039234
0.0065775	-0.0038657	0.012578	0.0028849	0.0051928	0.0060294	0.0029426	-0.0011251	0.008972	0.012895	0.0051063	0.0054813	0.0044427	0.0050197	0.0042696	0.0040388	0.0066641	0.0050774	-5.7698e-05	0.0090297	0.0010097	0.009347	0.0047312	0.0032022	-0.00077892	0.0019906	0.010905	-0.0035484	0.0036061	0.025618	0.0054524	0.00401	0.0040388	0.0049909	-0.00046158	0.0070968	0.0053659	0.0045004	0.0025676	0.0044716	0.0032888	-0.0074142	0.028387	0	0.0025099	-0.0051639	0.0082508	0.0039811	0.0027983	0.0041542
0.011684	-0.0044427	0.012117	0.0078757	0.010011	0.0036927	0.0065198	0.0039234	0.0021925	0.0067218	-0.0072699	0.014828	0.0056255	0.0045004	0.0047312	0.0040388	0.0053947	0.004962	0.0049332	0.0026252	-0.0093759	0.022214	0.0093182	0.0065487	0.0066641	0.0029137	-0.0032888	0.0098086	0.0023945	-0.0037215	0.0087124	0.00034619	0.010905	0.0039234	0.0040965	0.0027406	0.0055678	-0.0038657	0.02031	0.0041254	0.0050486	0.0055967	0.0019329	0.0050197	0.0034042	0.0048755	0.0041831	0.0040677	0.0044716	0.0027118
-0.0033465	0.010732	-0.010414	0.022762	0.012232	0.0062891	0.0046447	0.0057409	-0.00057698	0.0086547	2.8849e-05	0.0079911	0.0014424	0.0089143	0.0048466	0.0060583	0.0051639	0.0054236	0.00089432	0.0063179	0.0020483	0.0061737	0.0086258	0.0027983	0.0038369	0.0057698	0.0039811	0.0037792	0.0038946	0.0042119	0.0060871	0.0011828	-0.006866	0.0066929	0.010213	0.0096932	0.0017886	-0.029224	0.044773	0.0050486	0.00802	0.0036061	0.0042985	-0.00037504	0.0074719	0.00401	-0.0017021	0.01454	0.0036061	0.003635
0.012953	0.0084816	0.0044139	0.0052216	0.0056255	0.0056832	0.0044139	0.0013559	0.0051639	0.0069814	0.0053082	0.0010097	0.0013847	0.015434	0.0015578	0.0097221	0.0039234	0.0056255	0.0047024	0.0051351	0.0046735	-0.0020483	0.0091162	0.0046447	0.0020194	0.0060871	0.0044716	0.00066352	0.0052505	0.0050197	0.0038369	0.002481	-0.004962	-0.0075296	0.023656	0.015088	0.0045004	-0.00080777	0.010241	0.006116	0.003433	0.0037792	0.0068949	0.0025676	0.0047889	0.0025964	0.0031445	0.0040677	0.0029426	0.0037792
0.0079623	0.0079911	0.02129	0.0039523	0.0049043	0.0041542	0.0087124	0.0057986	0.0047889	0.0048466	0.0051639	0.0046447	-0.0024522	0.017021	0.0045581	0.0049332	0.0052505	0.0048755	0.0044716	0.0045004	0.0046447	0.0043273	0.0023656	0.0095778	0.0036638	0.0042985	0.0047889	-0.00034619	0.0085681	-0.0036927	0.012001	0.0034042	-0.00089432	-0.015896	0.030926	0.0080488	0.0036638	0.0059717	0.0033753	0.0043562	0.0037504	0.0036638	-0.0016155	0.010847	0.0038369	0.0037792	0.0024233	0.004385	0.0026829	0.003635
-0.00049043	0.029368	0.018983	0.0051928	0.0037504	0.0059717	0.0053947	0.0045293	0.0062025	0.0043273	0.0065198	0.0040677	0.0045004	0.0049332	-2.8849e-05	0.012059	0.0051351	0.0045293	0.0046735	0.0021348	0.0067218	0.004385	0.0042985	0.0042696	-0.001529	0.0099817	0.0039811	0.0033176	0.0027983	0.0034619	-0.0056255	0.0045004	0.0048178	-0.0060294	0.031445	0.0028849	0.0024233	0.0011828	0.0093759	0.0015867	0.0016444	0.012347	0.0032599	0.0031157	0.0032888	0.0048466	0.0035773	0.00077892	0.0051928	0.0028272
-0.0050197	0.016675	0.035628	0.016559	0.0078469	0.0057698	0.004962	0.0040677	0.0045293	0.0038657	0.012895	0.0054813	0.0055967	0.0041831	0.0043562	0.0054524	0.0053659	0.0013847	0.0075296	-0.00034619	0.010934	0.0042119	0.004587	0.0021348	0.0036638	0.0050197	0.0015867	-0.0026541	0.012347	0.0090008	-0.0039234	0.0077315	0.007068	-0.0032888	0.012203	0.00034619	0.0072988	-0.0012405	-0.0043562	-0.010184	0.0082796	0.026108	0.0088566	0.0039523	0.0039811	0.00401	0.0031734	0.0011828	0.0035196	0.0030291
-0.0178	-0.0091451	0.035051	0.026368	0.014511	0.0081931	0.0048755	0.0052216	-0.0026252	0.0036927	0.015203	0.0051928	0.0035773	0.0021637	0.0030291	-0.019473	-0.010299	0.003433	0.03733	0.018521	0.010559	0.0051063	0.0044716	0.0039811	-0.0078757	0.017107	0.0031445	0.0065487	-0.0016155	0.01177	0.0036061	0.0038369	0.0040388	0.00401	0.0042696	0.0037215	0.003635	0.0023368	-0.028243	-0.0093759	0.010472	0.033292	0.018694	0.0039811	0.0032888	0.0033753	-0.0019617	0.0060871	0.002106	-0.0066641
0.056746	-0.057352	0.020598	0.028503	0.0069814	0.0057698	-0.00057698	0.0096932	0.0053947	0.0041831	0.0016155	-0.0066352	0.012405	-0.024522	0.022906	-0.0047024	-0.057178	0.0079911	0.039869	0.072036	0.0054813	-0.0016155	0.0087989	0.00054813	-0.0026252	0.01555	-0.0014424	0.0042985	0.008972	0.0015867	0.0052505	0.0027983	0.005539	0.0035196	-0.0037215	0.0031445	-8.6547e-05	0.023627	-0.044312	-0.010097	0.0087412	0.032628	0.031099	0.0015578	-0.00077892	0.0072699	0.0029714	-0.0018463	0.0039523	-0.0092028
0.017425	0.011655	0.0049043	0.0059429	0.0040677	0.0059429	0.004385	-0.0032599	0.0092316	0.0032599	0.0063468	0.004587	-0.0023368	-0.017194	0.023656	-0.059919	0.042696	-0.00098086	-0.028185	0.075815	0.022589	0.003433	-0.00025964	-0.0014136	0.01428	0.0084527	-0.0020771	0.0084816	0.0036061	0.0032888	0.0024233	0.0068083	-0.0061448	0.010616	-0.001327	0.0096067	0.0011251	0	-0.0082508	-0.015175	0.0065487	0.025416	0.029109	-0.0045293	0.0074719	0.0016444	0.0034619	0.0027406	0.0037215	-0.0020483
0.0035484	0.0054813	0.0029426	0.0082796	0.0049043	0.0059717	0.003635	0.007443	0.0046447	0.0042985	0.0012117	-0.0027406	0.012751	-0.0032599	-0.025618	-0.018694	-0.015521	0.0038081	0.037186	0.054034	0.015838	0.0001154	0.0066352	0.0018175	0.00066352	0.011511	0.005337	0.0049043	0.0057698	0.0045293	0.0048755	-0.00086547	0.0013847	0.0092605	0.002856	0.0046735	0.0049043	0.0036638	0.0015867	-0.0092605	0.0072411	0.0090874	0.016328	0.0035484	0.0039234	0.0050774	0.0020194	0.0046158	0.0020194	-0.0027406
0.0082219	0.0053659	0.0056544	0.0052216	-2.8849e-05	0.0048755	0.002106	0.004385	0.0066352	0.0047601	0.0028272	0.0069526	0.0047601	-0.0032888	0.013184	-0.0054236	-0.057005	0.0051351	0.042581	0.05464	-0.00049043	0.0075873	0.0016155	-0.0035773	-0.0094913	0.032657	-0.0012117	0.0058852	0.011049	0.0054236	0.0038369	-0.0021637	0.001529	0.011482	0.013472	0.0054524	0.0025676	0.0037215	0.004385	0.0034907	0.0038657	0.0031445	0.0023368	0.0027118	0.0050197	0.0040965	0.0036061	0.003635	0.0051063	-0.0049043
0.010703	0.0039523	0.0030291	0.0025964	0.0044139	-0.0023079	-0.010011	-2.8849e-05	0.012318	0.01555	0.018434	-0.0035773	0.0089143	0.0083085	8.6547e-05	-0.0077892	-0.0075873	0.018579	0.031878	0.0042119	0.0017886	0.00075007	-0.0016732	0.0047889	-0.0023368	0.021089	0.00080777	0.0049909	0.007645	-0.0080488	0.006866	0.026397	-0.0032022	8.6547e-05	0.0072122	0.015982	0.0027406	0.004587	0.0020483	0.0051351	0.0039523	0.0036061	0.0026252	0.0036061	0.0046447	0.0048755	0.0014713	0.0053659	0.0046447	-0.00072122
0.0049043	0.0042696	0.0048178	0.0048178	-0.010039	0.015146	-0.0088278	0.005337	0.007443	0.0088855	0.036176	0.0041254	0.0019906	0.006866	0.006866	0.0059717	0.0017886	0.001327	0.0047312	0.0038657	0.003635	0.0041831	0.010213	0.0022214	0.0064621	0.0035484	-0.006116	0.014857	-0.0031157	0.0021348	0.011482	0.010241	0.007645	0.0043273	0.002856	0.0033176	0.0036927	0.0066641	-0.0019617	0.0070391	-0.0015867	0.0070968	0.0013559	0.0086547	0.0042696	0.0030291	0.0010386	0.0053082	0.0039234	0.0036927
0.0058852	0.0048755	0.005539	0.0063468	0.0060006	0.0044139	-0.0040388	0.013328	0.0069814	0.0071545	0.0029137	0.0059717	0.0038946	0.0038369	0.0068083	0.0035196	0.0043562	-0.00028849	0.011366	0.0037504	0.003635	0.0048178	0.0072122	0.00063468	0.0021637	0.0085104	-0.0034907	0.0059429	0.020973	0.004385	0.0056544	0.003433	0.0045581	-0.0067795	0.013646	0.0039523	-0.0045581	0.00802	0.008395	0.0025099	0.0025964	0.010847	0.0015001	0.0053082	-0.0048755	0.0075296	0.0065775	-0.0019617	0.0070103	0.0034619
0.0046158	0.0016444	0.0096644	0.0063468	0.0042408	0.0055101	0.0056544	0.004962	0.0033753	0.0062025	0.0049332	0.0062602	0.0024233	0.004587	0.0065487	0.0031157	0.0047312	0.0055967	0.0036638	0.0047601	0.0051639	0.0054524	0.004962	0.0017021	0.0018463	0.00046158	0.0023656	-0.015405	0.041514	0.0071545	0.0023656	0.0084239	0.0039811	0.0052505	0.0032599	0.00083662	0.0055967	0.0043562	0.0044427	0.0048178	0.0025099	0.0039523	0.0047312	0.003635	0.0032022	-0.0021925	0.0083662	0.003635	0.0042696	0.0032022
0.0050774	0.0048755	0.0064621	0.0050774	0.0048466	0.0039234	0.0051063	0.0060294	0.0038657	0.0045293	0.0074142	-0.0019617	0.0033753	0.003058	0.01555	0.009549	0.0047312	0.0033176	0.0042408	0.0064045	0.0053082	0.0021348	-0.0011828	0.003433	0.012174	0.0049043	-0.009924	0.0018175	0.017915	0.016213	0.009347	-0.0010386	0.008597	0.004962	0.0037792	0.0045293	0.0045581	0.0039234	0.0057986	0.0033465	0.0038369	-0.0015867	0.0084816	0.004587	0.0034042	-0.0030868	0.00089432	0.0082508	0.0050774	-0.0051351
0.0033465	0.0055967	0.0013847	0.0022214	0.0030868	-0.0013847	0.017915	0.0054236	0.0084527	0	0.0075873	0.0030003	-0.0036927	-0.00020194	0.028503	0.0037504	0.0052793	0.0056255	0.0038369	-0.0056544	0.0081931	-0.0041831	0.0065198	-0.0068083	0.015001	0.020108	0.011107	0.0030003	0.0038081	0.0055101	0.0015578	2.8849e-05	0.004385	0.0034619	0.0055678	0.00092316	0.0015867	0.0019617	0.018809	0.0055967	-0.0044716	0.012088	0.0029426	0.0036927	0.00075007	0.0076161	0.0022214	0.0029137	0.0042985	0.0039234
0.00077892	0.0047312	-0.0065775	-0.0089143	0.015117	-0.010876	0.016127	0.036378	0.010126	0.0075873	0.0012405	0.0057121	0.0038946	-0.00023079	0.012318	-0.0062314	0.010876	-0.0037792	0.0015578	0.034792	-0.053399	0.063064	-0.060236	0.023858	0.022935	0.017454	0.014742	0.015001	0.0019617	0.0056544	0.0038081	0.0022502	0.014194	0.0034907	0.0050197	0.0042985	-0.0065487	-0.030493	0.021175	0.017656	0.0055678	0.0032311	0.0030291	0.0071545	0.0048755	0.0033753	0.003058	0.0045004	-0.0011828	0.0041831
-0.00072122	0.0018175	-0.0094336	0.0045581	0.00023079	-0.0059717	0.014742	0.02931	0.0019329	-0.0076738	-0.0028272	0.020165	0.013674	0.01027	0.00098086	-0.0042119	-0.00023079	-0.0050774	0.063179	-0.069064	0.053947	-0.082306	0.01979	0.017454	0.054351	0.016184	0.004962	0.0065198	0.0021925	0.011453	-0.0070103	0.01653	-0.0065487	0.010674	0.0025387	0.0061448	-0.00089432	0.00051928	0.0034042	0.016588	0.0036927	0.00014424	0.018665	0.0023079	-0.0012694	0.0072122	0.0081354	0.00043273	0.0068949	0.0025964
8.6547e-05	0.0088566	-0.010213	0.018867	-0.0043562	-0.00083662	-0.0013847	0.01154	-0.0065487	0.062458	-0.071257	0.015636	0.041225	0.0013559	0.00063468	0.01102	-0.0026541	0.0065775	0.041225	-0.063266	0.044629	-0.037561	-0.053832	0.026051	0.046562	0.061102	0.0042119	0.00025964	0.012838	0.0042408	0.0027983	0.0034042	-0.0074142	0.016502	0.0042119	0.0035773	0.00401	0.0049332	-0.00069237	0.0063756	0.002106	0.0084239	0.002106	0.0049332	0.0056544	0.0033176	0.0077315	0.0033465	0.0049909	0.0030868
0.0022214	0.014165	0.014799	0	0.005914	0.0017309	-0.0010674	-0.0018463	0.033119	-0.053342	0.0046158	0.016992	0.032772	0.0042119	-0.00089432	0.015636	-0.0035484	0.040648	-0.056544	0.0579	-0.1111	0.016761	0.023425	0.030464	-0.020685	0.067074	0.021146	-0.0031734	0.022877	0.0023079	0.0033465	0.0057698	0.0052505	0.0051063	0.0028272	0.0040965	0.0036638	0.0046735	0.0040388	0.0032888	0.0068372	-0.0026829	0.012463	0.00046158	0.0061737	0.0022791	0.0059429	-0.0038369	0.0080488	0.002481
-0.0020194	0.0094913	0.014771	0.0017886	0.0050486	0.0057986	0.0021637	0.0028849	-0.0012982	-0.0058275	0.0062602	0.016934	0.012867	-8.6547e-05	-0.0032599	0.0065198	0.0054524	0.039119	-0.047889	0.056082	-0.11453	0.013674	0.021492	0.028301	-0.024695	0.039465	0.035224	0.018665	0.0071257	0.0040677	0.0049043	0.015261	0.0058852	-0.0065487	0.019127	0.004385	0.0016444	0.0046735	0.0045581	0.0049043	-0.0038657	0.0089143	0.0029714	0.0012982	-0.0012694	0.013963	0.0053947	0.0040677	0.0038369	-0.0023656
0.0044716	0.0056544	0.0062025	0.00086547	0.0023079	0.010068	0.0067218	0.0062025	0.0050486	0.0039811	0.0057121	0.0031734	0.00014424	0.0066929	0.0034042	0.0021637	-0.0036927	0.0047024	0.001154	0.0086835	-0.04186	0.042119	-0.036119	-0.027435	0.02507	0.042321	0.037561	0.019646	0.0041254	0.0037504	0.0037504	0.0060871	0.0022214	0.005914	0.0056544	0.0057409	0.0022502	0.0046447	0.0026829	0.0024522	0.002481	-0.0016155	0.00025964	-0.012722	-0.0062891	0.012924	0.044745	0.0038657	0.0023656	-0.0059429
0.0056544	0.0049332	0.0046158	0.0063468	-0.0011251	0.0097798	0.00401	0.0039523	0.0053659	0.0056544	0.0062891	0.0041542	0.0030291	-0.0022502	-0.00098086	0.013184	-0.0014424	0.0023368	-0.01705	0.045552	-0.068862	0.051697	-0.074199	0.02357	0.029397	0.059861	0.017454	0.0026252	0.0036638	0.0042119	0.0032599	0.0032888	-0.00802	0.012665	0.0082219	0.0037215	0.0041254	-0.0054813	-0.0034042	0.022675	0.0029426	0.00043273	-0.0037215	0.022098	-0.043995	0.0066064	0.025214	0.027781	-0.0018175	0.021723
0.0041254	0.0068372	0.0035773	0.0072122	0.0037504	0.0045581	0.00014424	0.0046735	-0.0023368	0.009549	0.00069237	-0.00043273	-0.0033753	0.027637	-0.050572	0.012751	0.031878	0.018954	-0.019675	-0.032628	0.058534	-0.059342	0.0012694	0.015261	0.038946	0.051409	0.0035773	0.00072122	0.0082508	-0.0033465	0.01578	0.001154	0.0060583	0.0027695	0.0047889	0.0029137	0.0069814	-0.0021348	0.0039523	0.0066929	0.0020771	0.0016444	0.00025964	0.017656	-0.042119	0.0086258	0.022935	0.035426	0.0052505	0.0023079
0.0088566	0.0035484	0.0058852	-0.0037792	0.01154	0.0049043	0.0038081	0.00040388	-0.0034619	0.0075296	0.00069237	-0.0020194	-0.008597	-0.01428	-0.0062025	0.014915	0.043331	0.0068949	-0.010184	-0.019386	0.0017598	-0.00063468	0.0039811	0.017165	0.038023	0.036263	0.0040677	0.0019617	0.0042408	0.006866	0.00089432	0.0064333	0.0034907	0.004385	0.0018175	0.0061448	0.0025964	0.0031734	0.0033753	0.0026541	0.0017309	0.0047601	-0.0012117	-0.0094336	0.0058852	0.0163	0.013703	0.0093759	-0.00095201	0.013097
0.0041542	0.0030291	0.0016444	-0.00057698	-0.0071834	-0.0065198	0.0029714	0.018463	0.016127	0.010011	0.0023368	-0.0029714	-0.0055101	-0.0092605	8.6547e-05	0.017742	0.03834	0.008597	-0.001529	-2.8849e-05	0.0057698	-0.0094336	-0.0085104	0.016155	0.033811	0.015434	0.0081354	0.0058852	0.0034042	0.0035773	0.0038657	0.0048178	0.002481	0.0055678	0.0046158	0.0038657	0.0047889	-0.0062602	0.012088	0.0047889	-0.00051928	0.0075584	0.0038369	-0.0067218	0.02256	0.0023368	0.0032311	0.0040388	0.0023368	0.0094047
0.013934	0.0049332	0.00077892	0.0075007	-0.014021	-0.0070968	0.0021348	0.021319	0.018406	0.015232	0.016271	0.0020194	0.0010674	-0.0052216	0.0021637	0.020454	0.020627	0.0020194	0.0013847	0.0052216	0.003433	-0.0014713	-0.0081065	0.025502	0.017396	0.0034907	0.0042119	0.0054813	0.00020194	0.0090008	0.0046447	0.0031734	-0.0040388	0.016069	0.0055101	0.0036927	0.0049043	0.0055678	0.0042696	0.0037215	0.0042119	0.004962	0.0035484	0.0047312	0.00069237	0.0047024	0.001529	0.0092605	0.0039523	0.0037792
0.015694	0.0042408	0.0049043	0.0023368	-0.0050197	0.0016732	0.0075296	0.026051	0.0053082	0.0051639	0.0040677	0.006866	0.0033465	0.0071834	0.0065775	0.0050486	0.0039234	0.0037792	-0.00066352	0.0017309	0.0027406	0.021694	0.004587	0.0048178	0.0046735	0.0032888	-0.00054813	0.0060583	0.0083662	0.0045004	0.004962	0.0033465	0.0032022	-0.0088566	0.0059717	0.01252	0.0031445	0.006116	0.01229	0.0045004	0.0038946	0.0038369	0.003433	0.0040677	0.0039234	0.0031157	-8.6547e-05	0.0025099	0.012982	0.0033465
0.0049043	0.0063179	0.0036638	-0.001904	0.020742	0.0049043	0.0050197	0.0051063	0.0022214	0.0028849	0.0070968	0.006866	0.0036927	0.0051639	-0.0022502	0.007068	0.0025676	-0.0042408	-0.00075007	0.0038657	0.0015578	0.018377	0.0208	0.0047601	0.0049909	0.005337	0.0030291	0.0043273	0.0040965	0.0015578	0.0028272	0.0016732	0.0027983	-0.0076738	-0.0027983	-0.0051351	-0.0092893	0.0057986	0.024608	0.037042	0.0017598	0.004962	0.0026829	0.0025964	0.0041542	-0.00098086	-0.0054236	-0.00031734	0.021262	0.014713
0.0057409	0.0013847	0.009549	0.0049332	0.0050774	0.0032599	0.0061448	0.0051928	0.0038081	0.0025964	-0.00072122	0.013357	0.0060006	0.0039523	0.0045293	0.0043562	-0.008597	0.00086547	0.0078757	0.023627	0.0073565	0.0057698	0.0047312	0.0027406	0	0.0080488	0.0068083	0.0027983	0.0018463	0.00054813	-0.0015867	-0.0080777	0.019011	0.011078	-0.0012694	-0.013905	-0.017742	0.0019906	0.018694	0.036955	0.014338	-0.00086547	2.8849e-05	0.0030868	0.013674	0.0051351	0.0023368	-0.0053947	0.015665	0.0017021
0.0055967	0.0060583	0.0026829	0.009347	0.0030868	0.0068949	0.0043273	0.0017309	0.0077027	0.0038946	-0.0053659	0.013472	0.0068372	0.0068083	0.0025676	0.0036638	0.0054524	-0.0075007	0.0045293	0.011886	0.017107	0.0046158	0.0020771	0.0049332	0.0050774	0.00025964	0.012203	0.0029714	0.0034907	-0.00066352	-0.019617	-0.0082508	0.017569	0.022704	0.00037504	-0.0057698	-0.018954	-0.00031734	0.018002	0.0386	0.0066929	0.0087412	0.0017886	0.00083662	0.0040965	0.014482	0.0044427	0.0060294	0.0032311	0.0031445
0.0068949	0.0014713	0.0084527	0.0064045	0.0017021	0.01203	-0.00057698	0.0090008	0.0047312	-0.0060583	0.02054	0.0042985	0.0015578	0.012665	0.0041831	0.0044427	-0.0018752	0.0080488	0.0066352	0.0060583	0.0022214	0.0056544	-0.0014424	0.0091739	0.0013847	0.0022214	-0.0025387	0.0079911	0.0084527	-0.0062602	-0.0079046	0.0013559	0.0023079	0.021637	0.018261	-0.0061448	-0.011626	-0.00049043	0.017713	0.031041	0.0067795	0.0039811	0.0037504	0.0077892	0.0039523	0.0029426	0.0055101	0.0048466	-0.0011251	0.0071834
0.0049909	0.0059717	0.0040965	0.0069526	0.008597	0.0079911	0.005539	0.0054236	0.0047601	0.0061448	0.00063468	0.011338	0.0046735	0.0056832	-0.0050197	0.014482	-0.004962	0.01327	0.0023079	0.0053659	0.0050197	0.0045004	0.0038081	0.0054813	0.0033753	-0.0040388	0.0010674	0.0096067	0.0062025	-0.0012117	-0.010472	-0.0096644	0.011395	0.0029426	0.018232	0.02507	0.0028849	0.0047024	0.010761	0.0081354	0.0050197	-0.0035773	0.01454	0.004962	0.0042696	0.0039234	0.0040965	0.0027983	0.0045293	0.0025676
-0.00066352	0.0082219	0.0027406	-0.0043562	0.022358	0.0070391	0.0044139	0.0052793	0.0010386	0.001154	0.012809	0.0044716	-0.0054236	0.013126	0.014107	0.0027695	-8.6547e-05	0.00066352	0.014799	0.0048178	0.0011828	0.0067218	0.0047024	0.0052505	0.0036927	0.0043273	0.0022791	0.0045293	0.0010386	-0.0030868	-0.009549	-0.012578	0.0067506	0.012463	0.011568	0.039033	0.0026829	0.0014713	0.0064045	-0.0061448	0.012722	-0.003433	0.013213	0.0046447	0.00014424	0.0090874	0.0066641	0.003635	0.0066064	0.0026541
0.0050774	0.0061448	0.0041542	0.0050774	0.007443	0.001327	0.0058275	0.0029426	-0.0026829	0.0052216	0.021089	0.0082219	0.0045581	0.0049332	0.0052505	0.0061737	0.0038657	0.0044716	0.005539	0.0024522	0.0068083	0.0050486	0.0036927	0.0048755	0.0040965	0.00401	0.0041254	0.003058	0.0013559	-0.0028272	-0.0031734	-0.010241	0.0084239	0.026945	0.014742	0.0032022	0.0055101	0.00069237	0.0056832	0.0011828	-0.0013847	-0.014165	-0.0068949	-0.0021348	0.0052216	0.023512	0.035542	0.0057409	0.0035484	0.0039234
-0.0037792	0.013847	-0.00054813	0.010155	0.0021925	0.0038369	0.010818	0.0046447	-0.0029426	0.010905	0.012117	0.0088278	0.00031734	0.011453	0.0053659	0.0032022	0.0056255	0.0047024	0.0059717	0.0050197	0.0049332	0.004962	0.00063468	0.0061737	0.0040677	0.0063756	0.0048755	0.0039523	0.0024233	0.00089432	0.010674	0.0039523	0.0020483	0.0029426	0.0033176	0.0050774	0.0021637	0.0057409	-0.0070103	0.0026252	0.011165	-0.0084239	-0.020252	-0.0094624	-0.00066352	0.013213	0.030089	0.027781	0.012895	0.0022791
0.0041254	0.0073853	0.0050486	0.0060294	0.0051639	0.0045004	0.0057409	0.0046447	0.0067218	0.0046447	0.0047601	-0.0038081	0.014078	0.0041254	0.0040677	0.0053659	0.0053082	0.0039234	0.0017021	0.0017886	-0.0048755	0.0090008	-0.0015578	-8.6547e-05	0.0012694	0.022704	0.013732	0.0028849	0.0012982	-0.0037792	0.0035484	0.0091162	0.0098663	0.015405	0.0026829	0.0045004	-0.0045293	0.010097	0.00075007	0.0027406	0.001327	-0.00017309	-0.014482	-0.025012	-0.0055101	0.01053	0.030811	0.041138	0.0045293	0.0042408
0.0037792	0.006491	0.015521	0.0068372	0.0037792	0.0044716	0.0040388	0.0068949	-0.0027118	0.014511	0.0026252	0.0051063	-0.001904	0.0076738	-0.0074142	0.021666	0.0027406	-0.00051928	0.0043562	-0.0033465	0.0015578	0	-0.0053947	-0.0036061	0.008597	0.012809	0.031186	0.013761	0.008597	0.0031734	0.00023079	0.0010963	0.01154	0.018146	0.012953	0.011915	-0.031647	0.0012117	0.0024233	0.0053082	0.0018175	-8.6547e-05	-0.0064045	-0.025733	-0.0076738	0.011136	0.031993	0.033551	0.0063756	0.0026252
0.010011	0.0019329	0.0077027	0.002106	0.01027	0.005337	0.0047889	0.0062314	0.0038369	0.004962	0.0037215	0.0067795	0.0057409	0.0043273	0.0042985	0.0037215	0.0071257	0.003058	0.0029714	0.00040388	0.0050486	-0.0014424	-0.010847	-0.00051928	-0.00051928	0.0038657	0.024983	0.02631	0.0032599	0.0065487	-0.002856	0.0077027	0.0056255	-0.0040677	0.010847	0.0016155	0.0027118	-0.0046735	-0.0020483	0.021492	0.0053082	-0.0041831	-0.0017309	-0.018983	-0.0048755	0.015261	0.023714	0.0081065	0.010789	0.0031157
0.0077603	0.0053659	0.0092316	0.0043273	0.0054236	0.0055678	0.0038946	0.0042696	-0.0063756	0.02305	-0.0012694	0.0011828	0.017338	-0.0035484	0.0098952	0.0023656	0.0085681	0.0056832	0.0049332	0.0010386	-0.0059429	0.010328	0.00080777	-0.0030291	-0.0055101	0.006116	0.016675	0.02582	0.0063756	0.0031157	0.0056255	0.0031734	0.0038946	0.00037504	-0.0058563	0.014857	-0.0033753	0.00037504	0.0075296	0.012607	0.0019906	0.0025099	-0.0034619	-0.0055678	0.0019906	0.027147	0.005914	-0.0030003	0.0010674	0.0023656
0.0054236	-0.0010674	0.013963	0.0053659	0.0054236	0.0022502	0.0088855	0.0057409	0.0060583	0.0014713	0.0090874	0.0021637	0.0058563	0.0024522	-0.00401	0.0038946	0.015434	0.0040965	-0.00072122	0.0062025	0.0038657	0.00043273	0.002481	0.018377	0.0068083	0.007645	0.0039523	0.0038081	0.0038081	0.0048178	0.00066352	0.0076738	-0.0025676	0.0015578	0.0077315	0.0090874	0.0047024	0.003433	-0.00028849	-0.0045004	0.017829	0.0084239	0.0043273	0.0026829	0.0029714	0.0030003	-0.0053659	0.01128	-0.0012694	0.00025964
0.014915	0.0054236	0.0047601	0.0051351	0.0015001	0.0077603	-0.0021348	0.0053659	0.01379	-0.0014136	0.012751	0.0033753	0.0050197	0.0034907	0.0032599	0.0046158	0.0027406	0.00802	5.7698e-05	-0.0033176	-0.0089143	-0.014973	-0.0012117	0.011972	0.022762	0.016703	0.029628	0.0038946	0.0045004	0.0017309	0.0063179	0.0029137	0.00095201	0.00083662	0.0099817	0.0018463	0.0043562	0.0046158	0.0023079	-0.0044139	0.010674	0	0.0091162	0.014396	0.0029137	0.0016732	0.0048466	-5.7698e-05	-0.0082508	0.01128
0.0044139	0.0052793	0.00025964	0.0098375	0.00080777	0.0014136	0.010414	5.7698e-05	0.015925	0.0025676	8.6547e-05	0.011251	0.0061737	0.0025676	0.0040965	0.0048178	0.0032311	0.0014713	-0.0040388	0.0011828	-0.014742	-0.012809	-0.00028849	0.012145	0.021867	0.027262	0.028474	-0.00069237	0.0084816	0.0046158	0.0034042	0.001154	0.0076738	0.0033176	0.0032888	0.0037215	0.0042408	0.0036927	0.0039811	0.0031445	0.002856	-0.0031445	-0.0044716	0.022444	0.0068083	0.003433	0.0012982	-0.0042985	0.0042119	0.013155
0.0066929	0.0040965	0.0068372	0.0056832	-0.00089432	0.010501	0.003058	0.00072122	0.015925	0.0036061	0.0051639	0.0053659	0.0042696	0.00049043	0.0063179	0.00054813	0.0034907	0.00060583	0.0046735	-0.0001154	-0.013703	-0.014684	0.0027695	0.016444	0.031243	0.027724	0.0085393	0.0054236	0.0034619	0.0026541	0.004587	0.0048178	0.0027118	0.0048755	0.0036061	-0.0011251	0.0092893	0.0044716	0.0039234	-0.0014136	0.0077603	0.001904	0.0019329	0.0081354	0.0029137	0.0027406	-0.0068372	0.0038657	0.01154	0.011741
0.0063468	0.0042696	0.0063756	0.0052505	0.0032599	0.0074142	0.004587	0.0057121	0.0047889	0.0024522	0.00083662	0.0087989	0.00028849	0.0059717	0.00063468	-0.0016155	0.0048466	0.0058852	0.0096932	-0.0012694	-0.00034619	-0.0094047	0.010241	0.020713	0.019963	0.0011828	-0.0034907	0.009924	0.010068	0.0086547	0.0035773	0.0047312	-8.6547e-05	0.012953	0.0033176	-0.0075873	0.020338	0.0027406	0.0051063	0.0037215	0.0030003	0.0036638	0.0037792	0.0024522	0.003058	-0.00083662	0.001529	-0.00017309	0.013674	0.0037215
0.0044716	0.0027983	0.0095778	0.003433	0.0058275	0.0047601	0.0047024	0.00092316	0.01304	0.0052505	0.0038369	0.0038946	0.0041831	0.0068083	0.0045581	0.0068083	0.0045004	0.010011	0.0035773	0.0042119	0.0044716	0.0057121	0.0041254	-0.0015867	0.0053082	0.0048755	-0.0081642	0.0076161	0.013819	0.0090008	-0.00051928	0.0079623	0.013617	0.0051351	0.0042119	0.0032599	0.004385	0.0042985	0.0028849	0.0034907	0.0062314	0.0021348	0.0050774	0.0023079	0.0040677	0.0037792	0.0032311	0.00401	0.0031734	-0.00034619
-0.0025387	0.0074142	-0.0035196	0.001904	0.015809	0.0043273	-0.0047601	-0.011713	0.0014713	0.012001	0.022012	0.02481	0.011136	0.0069526	0.0028272	0.0062314	0.0076161	0.0042985	0.0056255	0.0026829	0.0092605	0.0042985	0.001327	0.0096932	0.0041254	0.0051063	0.0051351	0.0038946	0.0053082	0.003058	0.0045004	0.0037504	0.0036638	0.0043562	0.0053082	0.0051351	0.0037792	0.0031734	0.0049909	-0.0096067	0.01353	0.0095778	0.0041831	0.0036061	0.0036927	0.003058	-0.0046158	0.010645	0.0018175	0.0038369
-0.0042119	0.0023079	0.0094336	0.0208	0.0066929	-0.0017021	0.010039	-0.039494	-0.0039523	0.0049332	0.011943	0.020021	0.018434	0.026166	0.030032	0.020108	0.0037792	-0.0033465	0.01229	0.0055101	0.0056544	0.0057121	0.0078757	0.0051639	0.0047601	0.0060583	0.0016155	0.0033753	0.0058563	0.009549	0.0041542	0.0030291	0.017107	0.0027406	0.0045004	0.0069526	-0.029974	0.017857	-0.0034907	-0.01229	0.019877	-0.0096644	0.026743	-0.025618	0.018175	-0.011395	0.010789	0.0081931	0.0050197	0.034532
0.0017309	-0.00063468	0.01203	0.0035196	-0.00075007	-0.0058563	-0.0054813	0.051438	-0.073363	0.042898	-0.015405	0.018175	0.02732	0.015203	0.015434	0.0056544	0.0022214	0.00049043	-0.00040388	-0.0068372	0.0033176	0.049707	-0.056977	0.035859	0.019502	0.01102	0.0020194	0.0059717	-0.012434	-0.0099529	0.019069	0.02582	0.0038946	0.0039234	0.0068372	0.0020194	0.0064621	-0.0021637	0.01053	0.0052216	0.0073853	0.0032599	0.0027983	0.004962	0.0029714	0.0036638	0.0032022	0.0034042	0.0013559	0.0077603
0.0088855	0.0035196	0.0028272	-0.0012694	0.0015867	0.0039234	0.0017598	-0.0021348	0.0041254	0.0055967	0.0093182	0.015694	0.017021	0.00034619	-0.00054813	-0.00075007	-0.010991	0.034936	-0.058304	0.051668	-0.031965	-0.022704	0.065775	-0.029887	0.042667	0.0091451	-0.005539	0.0062314	-0.01578	-0.0045581	0.015059	0.044773	0.0098663	0.0052216	0.0069526	0.0029137	0.0039523	0.0038946	0.0030868	0.0010674	-0.0036061	0.018059	0.0055678	0.0030868	0.0018463	0.0034042	0.0042696	0.0040677	-0.0038657	0.01027
0.012463	-0.0024522	0.0037215	0.033984	0.0070968	0.0055967	0.0038946	0.0032888	0.0047312	0.0012405	-0.001529	0.0038946	0.0040388	0.0026541	-0.00063468	-0.0027406	0.011828	0.018925	-0.04812	0.040706	0.039033	-0.11765	0.019185	0.023973	0.037821	0.079998	-0.067391	0.035398	-0.054351	0.019588	0.0069814	0.040071	0.027637	-0.0012982	0.0092316	0.0042696	0.0039811	0.0035484	0.0026252	0.00083662	-0.0082508	0.02631	0.011626	0.005337	0.0036638	0.0031157	0.0033176	0.005539	0.0025964	0.0073853
-0.002481	0.0033465	0.01177	0.024118	0.0062025	0.0049043	0.0035196	0.0049332	0.0022791	0.0033465	-0.0013559	0	-0.0021348	0.006866	0.012694	-0.0027406	0.010588	0.055159	-0.086345	0.039321	0.042466	-0.1104	0.0017598	0.027522	0.048524	0.017309	-0.0056832	0.00060583	-0.018636	0.0085104	0.018608	0.029541	0.0053082	-0.0063179	0.00034619	0.01754	-0.0025676	0.00098086	0.004385	-0.0067795	0.039494	0.026858	-0.088422	0.031243	0.043908	0.011193	0.0065775	-0.0017598	0.0045581	0.0079046
-0.0051928	0.010674	0.0068083	0.00072122	-0.0017598	0.0097221	0.011511	0.00017309	0	-0.0012982	-0.0056832	0.012117	0.060352	-0.08972	0.01829	0.044658	-0.002856	-0.010991	0.031849	-0.0029714	-0.055563	0.037879	0.050399	-0.053745	0.045841	0.023916	0.0041542	-0.0039234	-0.0037215	0.012722	0.010847	0.0011828	-0.0029137	0.012347	0.0025676	0.0012117	-0.010386	0.030032	-0.065372	0.0061448	0.02631	0.03234	0.031243	-0.052101	-0.0097509	0.063641	0.0010097	0.0066064	0.0051063	0.0017021
0.0026829	0.0037792	0.0021637	-0.003058	-0.0027983	0.0066352	0.021435	0.00034619	0.0055101	-0.0027695	0.050341	-0.073074	0.042494	-0.0094336	-0.037907	0.033551	0.037359	-0.0025964	-0.0019617	0.035542	-0.061477	0.039725	-0.016675	0.023396	0.035138	0.014136	0.0051351	0.00089432	0.0021925	-0.0047024	0.009549	0.0041542	0.0014424	0.0020483	0.0027406	0.00017309	0.00095201	0.061419	-0.096211	0.032772	0.036609	-0.072353	-0.042119	0.024983	0.028762	0.069987	0.011222	-0.00034619	0.0041542	-0.0039811
0.0076738	0.0041831	0.0044716	0.0040677	0.0055678	0.004587	0.0022502	0.0013847	0.001154	-0.0069814	0.018983	-0.021117	-0.005539	0.052101	-0.062169	0.016617	0.037273	0.010963	0.0014424	0.010299	0.010645	0.010155	0.0085104	-0.0013559	0.012174	0.0011251	-0.00031734	0.001529	-0.0048178	0.013472	0.01102	0.0051063	-0.00025964	-0.0047601	0.010357	-0.0048466	0.012838	-0.022271	-0.010991	0.035051	0.036638	-0.10316	-0.014251	0.025704	0.026022	0.052245	0.0095778	-0.0042696	0.018925	0.010443
0.0038081	-0.0025676	0.019329	0.013184	-0.00077892	0.0076738	0.0022791	0.0042408	0.00031734	-0.0015001	-0.0077603	0.067506	-0.070911	0.060208	-0.065862	0.025531	0.0208	0.0060294	0.0081642	0.012982	0.020194	0.0018463	0.00802	-0.0020771	0.0076161	0.0018463	-0.00060583	0.0032022	0.0075873	-0.0053659	0.011338	0.0032888	-0.001154	-0.0075296	0.007818	0.0090874	0.025964	-0.055361	0.042667	-0.023339	-0.058102	0.028474	0.036292	0.042985	-0.040186	0.051553	0.011395	0.0047889	0	0.0029714
0.0048466	0.0027406	0.017482	0.0019329	0.0098952	0.001904	0.0022502	0.00014424	0.0093182	0.0095778	0.0036638	-5.7698e-05	0.0027118	0.00043273	0.011107	0.0092605	-0.0032022	0.0019617	0.0051351	0.00051928	0.024954	0.0012405	0.0029137	0.0019329	-0.0039811	0.0075584	-0.0052216	0.004962	0.025099	-0.046995	0.013934	0.048408	-0.028128	-0.052707	0.024608	0.038427	0.04662	-0.036638	-0.010328	0.041398	-0.039754	-0.022271	0.020915	0.032513	0.030032	0.019098	0.0033753	0.0027118	0.0029714	0.0042696
0.0079911	0.0068372	0.0028849	0.0060583	0.0096644	0.004962	0.0047601	0.0052793	0.0046735	0.0048178	0.0047889	5.7698e-05	0.011799	0.0029714	0.0066064	0.0045581	0.0043562	0.0010674	0.004962	0.0044427	0.004587	0.0035196	0.0043273	0.0010674	-0.0069237	0.014944	-0.00054813	0.0075873	-0.0044139	-0.01503	-0.013472	-0.0037215	-0.00034619	0.04085	0.038859	-0.07293	0.0032888	0.020194	0.017021	0.0052793	0.0060583	0.010241	0.030032	0.0031445	-0.00080777	-0.010241	0.038167	-0.00401	0.0071834	-0.0023079
0.0053947	0.00034619	0.013069	0.014482	0.0028272	0.0074142	0.0030868	0.0051351	0.0061448	0.0069526	0.004962	0.0045293	0.0037504	0.0031445	0.004385	0.0031157	-0.0011828	0.0035484	-0.0014424	-0.00075007	0.018665	0.021031	0.0018752	0.0082508	-0.0055967	0.014944	0.013213	0.0041831	-0.010386	-0.038484	-0.011886	0.020685	-0.019156	0.039206	0.04362	-0.086979	0.028214	0.026945	0.025416	0.015232	0.0013847	0.0020194	0.0024522	-0.0014424	0.0046447	0.0059429	0.00051928	0.00031734	0.030897	-0.006491
# Channel: Scaled Data 3
# Width: 75.0 µm
# Height: 52.7 µm
# Value units: m
-7.4101e-09	-1.2536e-08	-1.677e-08	-2.0113e-08	-2.2899e-08	-2.5517e-08	-2.2954e-08	-2.4849e-08	-2.3289e-08	-1.2202e-08	-1.2982e-08	-1.4486e-08	-1.7829e-08	-4.5129e-09	1.3037e-08	8.1511e-08	6.6022e-08	8.3739e-08	1.136e-07	3.0532e-08	1.8386e-09	-1.3984e-08	-4.8082e-08	-5.3598e-08	-4.953e-08	-5.5492e-08	-5.9671e-08	-6.1955e-08	-6.1231e-08	-5.5158e-08	-5.5993e-08	-3.4599e-08	-1.4207e-08	3.5992e-08	1.4191e-07	1.8503e-07	2.774e-07	3.4309e-07	3.9948e-07	4.3814e-07	4.3881e-07	4.3953e-07	4.3753e-07	4.5313e-07	4.5307e-07	4.5909e-07	4.7463e-07	4.831e-07	4.9191e-07	4.884e-07
-9.2487e-09	-1.3984e-08	-1.8163e-08	-1.9834e-08	-2.2397e-08	-2.5406e-08	-2.6186e-08	-2.9417e-08	-2.9027e-08	-2.3177e-08	-2.1506e-08	-2.0837e-08	-1.7996e-08	-1.9444e-08	-8.4686e-09	-1.7829e-09	3.6103e-08	7.0535e-08	2.769e-08	9.9729e-09	5.9615e-09	-2.4905e-08	-4.1563e-08	-4.0003e-08	-4.6968e-08	-5.3876e-08	-5.6049e-08	-5.7275e-08	-5.7832e-08	-5.8779e-08	-6.0451e-08	-6.1565e-08	-4.719e-08	-1.677e-08	5.8389e-08	9.5997e-08	2.0152e-07	2.4019e-07	3.0582e-07	3.8716e-07	4.3864e-07	4.4377e-07	4.4906e-07	4.4722e-07	4.4555e-07	4.611e-07	4.7959e-07	4.8617e-07	5.0929e-07	5.1547e-07
-2.3512e-08	-2.8247e-08	-3.1869e-08	-3.5045e-08	-3.783e-08	-4.0449e-08	-4.2566e-08	-4.4906e-08	-4.6968e-08	-4.6243e-08	-4.6132e-08	-4.4962e-08	-3.4989e-08	-3.2482e-08	-3.6047e-08	-3.939e-08	-3.822e-08	-2.1004e-08	-2.5796e-08	-2.964e-08	-4.0003e-08	-3.7719e-08	-4.3012e-08	-4.1285e-08	-4.5296e-08	-5.109e-08	-5.6161e-08	-5.8111e-08	-5.7943e-08	-5.1202e-08	-5.5771e-08	-5.3152e-08	-5.6439e-08	-4.8806e-08	-1.0864e-08	9.6387e-09	5.3876e-08	1.5778e-07	1.8107e-07	2.5729e-07	3.1317e-07	4.0137e-07	4.4884e-07	4.6305e-07	4.4928e-07	4.6583e-07	4.7335e-07	4.9246e-07	5.2032e-07	5.3765e-07
-1.17e-08	-1.7104e-08	-2.1784e-08	-2.4905e-08	-2.847e-08	-3.0643e-08	-3.2482e-08	-2.9919e-08	-3.6549e-08	-3.9725e-08	-4.1452e-08	-4.3123e-08	-3.9112e-08	-3.9223e-08	-4.0393e-08	-4.368e-08	-4.3458e-08	-4.4516e-08	-4.0839e-08	-4.4293e-08	-4.2232e-08	-4.953e-08	-5.1592e-08	-4.5185e-08	-4.9475e-08	-5.6662e-08	-6.0005e-08	-6.2178e-08	-6.4295e-08	-6.6635e-08	-6.9031e-08	-7.0646e-08	-7.2708e-08	-7.5048e-08	-7.4546e-08	-5.46e-08	-2.6687e-08	-3.5657e-09	6.4518e-08	1.0586e-07	1.8046e-07	2.4765e-07	3.3395e-07	4.1084e-07	4.4399e-07	4.6115e-07	4.7653e-07	4.8756e-07	5.3637e-07	5.4489e-07
-7.8001e-09	-1.3483e-08	-1.7829e-08	-2.1952e-08	-2.4013e-08	-2.6687e-08	-2.9195e-08	-3.1813e-08	-3.081e-08	-3.4432e-08	-3.6215e-08	-3.8777e-08	-4.056e-08	-4.2455e-08	-4.4126e-08	-4.4906e-08	-4.5073e-08	-4.7692e-08	-4.9809e-08	-5.1982e-08	-5.4433e-08	-5.6272e-08	-5.7386e-08	-5.7163e-08	-5.8389e-08	-6.0283e-08	-6.1342e-08	-6.3125e-08	-6.4295e-08	-6.6858e-08	-6.5298e-08	-6.3849e-08	-6.5131e-08	-6.2568e-08	-6.5075e-08	-6.5688e-08	-5.7331e-08	-4.5742e-08	-3.7273e-08	-3.0086e-09	6.1676e-08	8.2681e-08	1.6497e-07	2.491e-07	3.0983e-07	4.0544e-07	4.4917e-07	4.7469e-07	5.4361e-07	5.4673e-07
-2.0057e-09	-1.0474e-08	-1.4263e-08	-1.8553e-08	-2.1394e-08	-2.3846e-08	-2.4292e-08	-2.847e-08	-3.0587e-08	-3.2816e-08	-3.3596e-08	-3.5713e-08	-3.8165e-08	-4.1396e-08	-4.2678e-08	-4.4795e-08	-4.6522e-08	-4.8416e-08	-4.9976e-08	-5.1592e-08	-4.9642e-08	-5.2316e-08	-5.4489e-08	-5.5938e-08	-5.7665e-08	-5.8612e-08	-6.0395e-08	-6.1063e-08	-5.7553e-08	-5.7721e-08	-5.3096e-08	-5.2929e-08	-5.8501e-08	-5.9058e-08	-6.4072e-08	-6.8195e-08	-6.8195e-08	-6.0061e-08	-6.3403e-08	-6.8529e-08	-7.0591e-08	-4.4572e-09	3.9502e-08	7.9004e-08	1.9244e-07	2.0899e-07	3.1429e-07	4.0215e-07	4.7268e-07	5.0806e-07
-2.5072e-09	-8.9144e-09	-1.1979e-08	-1.6324e-08	-1.9222e-08	-2.2286e-08	-2.4905e-08	-2.5462e-08	-2.9473e-08	-3.1033e-08	-3.2482e-08	-3.5212e-08	-3.7886e-08	-3.9725e-08	-4.2065e-08	-4.3792e-08	-4.5686e-08	-4.719e-08	-4.8695e-08	-4.9642e-08	-5.1536e-08	-5.2316e-08	-5.421e-08	-5.4935e-08	-5.6662e-08	-5.8278e-08	-5.9671e-08	-6.1008e-08	-6.2846e-08	-5.4935e-08	-5.4935e-08	-5.8779e-08	-6.2233e-08	-6.4351e-08	-6.5855e-08	-6.6022e-08	-6.5966e-08	-6.3069e-08	-6.1175e-08	-5.9169e-08	-6.2289e-08	-6.7638e-08	-5.3876e-08	-2.3734e-08	4.2956e-08	1.1238e-07	1.3528e-07	2.8381e-07	2.8548e-07	4.0455e-07
-3.4543e-09	-8.3572e-09	-1.2647e-08	-1.5823e-08	-1.6937e-08	-1.9667e-08	-2.34e-08	-2.5406e-08	-2.8025e-08	-2.9529e-08	-3.12e-08	-3.354e-08	-3.5602e-08	-3.7552e-08	-3.7273e-08	-4.1006e-08	-4.251e-08	-4.3792e-08	-4.3903e-08	-4.4962e-08	-4.7358e-08	-4.953e-08	-5.0756e-08	-5.2483e-08	-5.07e-08	-4.7859e-08	-5.226e-08	-5.3319e-08	-5.6495e-08	-5.6662e-08	-5.5269e-08	-5.8333e-08	-6.0228e-08	-6.1732e-08	-6.3181e-08	-6.5521e-08	-6.7638e-08	-6.8752e-08	-6.1955e-08	-5.0255e-08	-4.9586e-08	-5.3208e-08	-6.2289e-08	-6.7303e-08	-4.5909e-08	-1.2926e-08	2.8247e-08	9.1261e-08	1.8241e-07	1.9879e-07
2.7857e-10	-4.29e-09	-7.8558e-09	-1.1533e-08	-1.5099e-08	-1.7606e-08	-1.6603e-08	-1.8776e-08	-2.1227e-08	-2.0782e-08	-2.3456e-08	-2.8025e-08	-3.0142e-08	-3.2872e-08	-3.2426e-08	-3.51e-08	-3.5992e-08	-4.134e-08	-4.134e-08	-3.7162e-08	-3.3095e-08	-4.4015e-08	-4.5352e-08	-4.8138e-08	-4.4628e-08	-5.1536e-08	-5.4489e-08	-5.5158e-08	-5.7665e-08	-5.8779e-08	-5.9949e-08	-6.2289e-08	-6.3515e-08	-6.5019e-08	-6.6245e-08	-6.7303e-08	-6.6746e-08	-6.3961e-08	-6.0172e-08	-4.9698e-08	-4.8973e-08	-5.6216e-08	-5.0255e-08	-5.3765e-08	-6.2178e-08	-6.3849e-08	-3.5602e-08	1.9054e-08	3.9056e-08	6.8139e-08
5.0143e-09	-8.9144e-10	-5.6829e-09	-1.0029e-08	-1.1979e-08	-1.443e-08	-1.7717e-08	-1.9333e-08	-1.9166e-08	-2.1896e-08	-2.106e-08	-2.6075e-08	-2.8303e-08	-2.9585e-08	-3.2705e-08	-3.4209e-08	-3.6103e-08	-3.7997e-08	-3.744e-08	-3.7942e-08	-3.5657e-08	-4.1842e-08	-4.4293e-08	-4.29e-08	-4.0338e-08	-4.4238e-08	-5.0478e-08	-5.382e-08	-5.4935e-08	-5.7052e-08	-5.499e-08	-5.8278e-08	-5.9615e-08	-6.0896e-08	-6.1509e-08	-6.3905e-08	-6.5131e-08	-6.6858e-08	-6.8529e-08	-6.4852e-08	-6.3236e-08	-6.7861e-08	-5.6718e-08	-5.2818e-08	-6.2289e-08	-6.8139e-08	-6.9142e-08	-6.2902e-08	-3.2983e-08	5.07e-09
2.8415e-09	-1.8943e-09	-5.5158e-09	-8.4129e-09	-1.17e-08	-1.5433e-08	-1.7717e-08	-1.872e-08	-1.911e-08	-2.2174e-08	-2.4737e-08	-2.6743e-08	-3.0532e-08	-3.237e-08	-3.4543e-08	-3.627e-08	-3.8109e-08	-3.978e-08	-3.5267e-08	-3.3707e-08	-3.744e-08	-4.017e-08	-4.3068e-08	-4.2232e-08	-4.0505e-08	-4.5296e-08	-4.602e-08	-5.0756e-08	-5.1202e-08	-4.9586e-08	-5.5269e-08	-5.5492e-08	-5.7943e-08	-5.3598e-08	-5.538e-08	-6.2512e-08	-6.5799e-08	-6.6579e-08	-6.5743e-08	-6.8139e-08	-6.9699e-08	-7.0981e-08	-7.1816e-08	-7.2875e-08	-7.1761e-08	-6.1342e-08	-5.4823e-08	-5.8835e-08	-6.6245e-08	-6.7081e-08
3.4543e-09	-1.2257e-09	-4.0672e-09	-6.7415e-09	-1.0753e-08	-1.3316e-08	-1.6714e-08	-1.8052e-08	-1.9389e-08	-2.1506e-08	-2.2732e-08	-2.5016e-08	-2.8247e-08	-3.003e-08	-3.2147e-08	-3.3986e-08	-3.6326e-08	-3.6883e-08	-3.8053e-08	-3.9725e-08	-4.1619e-08	-4.173e-08	-4.3513e-08	-4.017e-08	-3.978e-08	-4.5296e-08	-4.7302e-08	-4.9085e-08	-5.0478e-08	-5.1035e-08	-4.68e-08	-4.9976e-08	-4.8973e-08	-5.1313e-08	-5.5659e-08	-5.6439e-08	-5.4935e-08	-5.2372e-08	-6.0785e-08	-6.2846e-08	-6.4573e-08	-6.6356e-08	-6.7081e-08	-6.8808e-08	-7.0813e-08	-6.8362e-08	-6.8306e-08	-6.9086e-08	-6.8696e-08	-6.9253e-08
5.2929e-09	-5.5715e-10	-3.2872e-09	-4.1786e-09	-4.1229e-09	-1.209e-08	-1.4876e-08	-1.7383e-08	-2.028e-08	-2.1116e-08	-2.1952e-08	-2.2676e-08	-2.5127e-08	-2.7189e-08	-2.0614e-08	-2.0057e-08	-2.6632e-08	-2.9696e-08	-3.1535e-08	-3.3986e-08	-3.627e-08	-3.8165e-08	-4.056e-08	-4.2566e-08	-4.3123e-08	-4.5965e-08	-4.7135e-08	-4.8973e-08	-5.0589e-08	-5.1369e-08	-4.6912e-08	-4.6578e-08	-4.602e-08	-4.9642e-08	-5.5771e-08	-5.8501e-08	-5.7163e-08	-6.1955e-08	-6.3571e-08	-6.4796e-08	-6.6245e-08	-6.7805e-08	-6.7303e-08	-6.7749e-08	-6.8306e-08	-5.9002e-08	-6.1732e-08	-6.3571e-08	-6.5743e-08	-6.8195e-08
7.4658e-09	1.56e-09	-3.12e-09	-4.29e-09	-2.73e-09	-9.9729e-09	-1.2926e-08	-1.4932e-08	-1.7439e-08	-1.9389e-08	-2.2007e-08	-2.4849e-08	-2.5573e-08	-2.4682e-08	-2.7635e-08	-2.691e-08	-2.7857e-08	-3.0532e-08	-3.2203e-08	-3.3373e-08	-3.6827e-08	-3.7942e-08	-3.8499e-08	-4.0895e-08	-4.1953e-08	-4.3792e-08	-4.6633e-08	-4.7748e-08	-4.8862e-08	-4.992e-08	-5.2316e-08	-5.226e-08	-4.8416e-08	-5.0199e-08	-5.1926e-08	-5.6996e-08	-5.8222e-08	-6.0228e-08	-6.1342e-08	-6.2178e-08	-6.3793e-08	-6.5019e-08	-6.7248e-08	-6.8919e-08	-6.9142e-08	-7.0702e-08	-7.1649e-08	-7.2095e-08	-7.2875e-08	-7.4825e-08
1.014e-08	5.7386e-09	4.4572e-09	1.3929e-09	-8.9144e-10	-8.3572e-09	-1.0642e-08	-1.365e-08	-1.6157e-08	-1.8497e-08	-2.0893e-08	-2.2063e-08	-2.4793e-08	-2.6409e-08	-2.7913e-08	-2.9807e-08	-3.1813e-08	-3.354e-08	-3.5992e-08	-3.7496e-08	-3.8833e-08	-4.0505e-08	-4.2176e-08	-4.3792e-08	-4.212e-08	-3.8945e-08	-4.5742e-08	-4.7525e-08	-4.9196e-08	-5.0478e-08	-5.0478e-08	-5.304e-08	-5.3598e-08	-5.5659e-08	-5.6606e-08	-5.8222e-08	-5.9615e-08	-6.0729e-08	-5.7108e-08	-5.3932e-08	-5.8501e-08	-5.9726e-08	-6.2791e-08	-6.3738e-08	-5.7108e-08	-6.3403e-08	-6.4183e-08	-6.5075e-08	-6.7972e-08	-7.0145e-08
8.6915e-09	3.12e-09	-7.8001e-10	-3.3429e-09	-5.9615e-09	-8.6915e-09	-1.1644e-08	-1.404e-08	-1.6269e-08	-1.8609e-08	-2.106e-08	-2.2787e-08	-2.4682e-08	-2.6687e-08	-2.886e-08	-3.0142e-08	-3.1702e-08	-3.315e-08	-3.4766e-08	-3.627e-08	-3.6772e-08	-3.5992e-08	-3.7663e-08	-3.9446e-08	-3.9335e-08	-3.9112e-08	-4.4683e-08	-4.5296e-08	-4.8082e-08	-4.8862e-08	-5.0088e-08	-5.1536e-08	-5.2929e-08	-5.3932e-08	-5.5659e-08	-5.6606e-08	-5.7832e-08	-5.8946e-08	-5.6383e-08	-5.2762e-08	-5.6662e-08	-5.5771e-08	-5.8055e-08	-6.0673e-08	-6.3125e-08	-6.5131e-08	-6.6746e-08	-6.6189e-08	-6.6189e-08	-6.6133e-08
1.053e-08	4.9586e-09	1.3372e-09	-1.8943e-09	-5.2372e-09	-8.4129e-09	-1.1254e-08	-1.4096e-08	-1.365e-08	-1.6937e-08	-1.8887e-08	-2.0392e-08	-2.223e-08	-2.2732e-08	-1.7606e-08	-2.223e-08	-2.8136e-08	-2.886e-08	-3.0365e-08	-3.2315e-08	-3.3986e-08	-3.4153e-08	-3.588e-08	-3.7775e-08	-3.9056e-08	-4.0226e-08	-3.8053e-08	-3.4543e-08	-3.2315e-08	-4.5185e-08	-4.7358e-08	-4.8193e-08	-4.9865e-08	-5.0868e-08	-5.2483e-08	-5.3208e-08	-5.4545e-08	-5.6161e-08	-5.5938e-08	-5.7275e-08	-5.9893e-08	-6.0785e-08	-6.2791e-08	-6.4128e-08	-6.5353e-08	-6.6579e-08	-6.8418e-08	-6.6523e-08	-5.4768e-08	-6.2345e-08
1.365e-08	9.1372e-09	4.3458e-09	1.0586e-09	-1.7272e-09	-4.0115e-09	-7.0201e-09	-9.5272e-09	-1.1422e-08	-1.4096e-08	-1.6213e-08	-1.8163e-08	-2.0057e-08	-1.8832e-08	-1.287e-08	-1.0586e-08	-2.184e-08	-2.3567e-08	-2.5295e-08	-2.7746e-08	-2.9919e-08	-2.3623e-08	-3.5546e-08	-3.5323e-08	-3.6047e-08	-3.7273e-08	-3.8387e-08	-3.9557e-08	-4.1786e-08	-4.5073e-08	-4.602e-08	-4.7358e-08	-4.875e-08	-4.7413e-08	-4.8528e-08	-5.2149e-08	-5.3319e-08	-5.5046e-08	-5.343e-08	-5.5269e-08	-5.6773e-08	-5.7665e-08	-5.7888e-08	-5.9113e-08	-6.1676e-08	-6.3181e-08	-6.4239e-08	-6.4406e-08	-5.9615e-08	-6.3236e-08
1.2982e-08	8.1901e-09	4.3458e-09	3.3429e-10	-1.5043e-09	-5.1258e-09	-7.9115e-09	-1.0642e-08	-1.3149e-08	-1.3093e-08	-1.6937e-08	-1.7996e-08	-2.0113e-08	-2.2007e-08	-2.2007e-08	-2.262e-08	-2.5239e-08	-2.6576e-08	-2.8637e-08	-3.0532e-08	-3.1646e-08	-3.315e-08	-3.5435e-08	-3.6215e-08	-3.7162e-08	-3.8276e-08	-3.978e-08	-4.1396e-08	-3.9836e-08	-4.1898e-08	-4.3625e-08	-4.5463e-08	-4.7023e-08	-4.8305e-08	-4.9865e-08	-5.1202e-08	-5.226e-08	-5.382e-08	-5.5158e-08	-5.5882e-08	-5.8111e-08	-5.6272e-08	-5.7888e-08	-5.9671e-08	-6.1175e-08	-6.1899e-08	-6.3069e-08	-6.4351e-08	-6.5632e-08	-6.5911e-08
2.0614e-08	1.5433e-08	1.0642e-08	7.8558e-09	5.1815e-09	2.4515e-09	-3.9e-10	-2.7857e-09	-5.1258e-09	-6.9643e-09	-6.1286e-10	-3.6772e-09	-6.9643e-09	-1.3093e-08	-1.6659e-08	-1.8052e-08	-1.8999e-08	-1.9946e-08	-2.4069e-08	-2.5406e-08	-2.6966e-08	-2.8916e-08	-3.0532e-08	-3.2036e-08	-3.3095e-08	-3.4543e-08	-3.5713e-08	-3.7552e-08	-3.8945e-08	-4.1508e-08	-4.0728e-08	-4.212e-08	-4.4349e-08	-4.6076e-08	-4.7246e-08	-4.8973e-08	-5.0088e-08	-5.1369e-08	-5.2595e-08	-5.3988e-08	-5.5325e-08	-5.6551e-08	-5.7999e-08	-5.9671e-08	-6.0673e-08	-6.1843e-08	-6.3181e-08	-6.3738e-08	-6.4406e-08	-6.6356e-08
3.0977e-08	2.9027e-08	2.3066e-08	1.5154e-08	1.1366e-08	7.9115e-09	5.6272e-09	2.7857e-09	-2.2286e-10	1.8943e-09	4.5686e-09	-2.1172e-09	-7.4658e-09	-1.1199e-08	-1.2424e-08	-1.4096e-08	-1.6213e-08	-1.9054e-08	-2.0614e-08	-2.0169e-08	-1.9723e-08	-2.3957e-08	-2.8415e-08	-3.0086e-08	-3.1033e-08	-3.2482e-08	-3.4487e-08	-3.5546e-08	-3.7106e-08	-3.8332e-08	-4.0338e-08	-4.1619e-08	-4.3458e-08	-4.4683e-08	-4.6188e-08	-4.7469e-08	-4.875e-08	-4.992e-08	-5.1035e-08	-4.3402e-08	-5.2539e-08	-5.4155e-08	-5.5771e-08	-5.7163e-08	-5.7832e-08	-5.9058e-08	-6.0005e-08	-6.1788e-08	-6.3348e-08	-6.4741e-08
3.2983e-08	2.7635e-08	2.3679e-08	1.6102e-08	1.326e-08	7.9115e-09	6.3515e-09	6.1843e-09	-2.4515e-09	-5.46e-09	-6.3515e-09	-8.1344e-09	-1.053e-08	-1.209e-08	-1.4932e-08	-1.6547e-08	-1.7216e-08	-1.2536e-08	-1.5266e-08	-1.6436e-08	-1.0084e-08	-1.1422e-08	-1.4932e-08	-1.3984e-08	-1.2257e-08	-1.8553e-08	-2.6186e-08	-2.9306e-08	-3.0253e-08	-3.2147e-08	-1.6324e-08	-2.9417e-08	-3.4153e-08	-3.5379e-08	-3.7775e-08	-3.8777e-08	-3.9502e-08	-4.1173e-08	-4.4126e-08	-4.6856e-08	-4.8249e-08	-4.914e-08	-5.031e-08	-5.0533e-08	-5.3375e-08	-5.4433e-08	-5.6941e-08	-5.9281e-08	-6.0395e-08	-6.1063e-08
2.8415e-08	2.2509e-08	1.7829e-08	1.1143e-08	9.0258e-09	5.6272e-09	5.6829e-09	6.5186e-09	0	-3.0086e-09	-6.3515e-09	-8.1901e-09	-9.8615e-09	-1.1589e-08	-1.3929e-08	-1.56e-08	-1.7494e-08	-1.9054e-08	-2.1116e-08	-1.3204e-08	-5.5158e-09	-4.1229e-09	-2.7857e-10	2.0614e-09	2.6186e-09	-5.1815e-09	-1.3204e-08	-2.0002e-08	-2.73e-08	-2.9919e-08	-2.7635e-08	-2.9696e-08	-3.3317e-08	-3.4265e-08	-3.6716e-08	-3.8387e-08	-3.9446e-08	-4.0839e-08	-4.2789e-08	-4.4739e-08	-4.5408e-08	-4.6578e-08	-4.8695e-08	-5.0366e-08	-5.3208e-08	-5.2483e-08	-5.2985e-08	-5.6328e-08	-5.8166e-08	-5.7888e-08
2.4459e-08	2.0503e-08	1.2926e-08	8.9701e-09	5.9615e-09	2.8972e-09	8.9144e-10	2.2843e-09	-3.1757e-09	-5.5158e-09	-7.1872e-09	-9.0815e-09	-1.1143e-08	-1.287e-08	-1.4709e-08	-1.3427e-08	-1.6714e-08	-1.8107e-08	-1.9723e-08	-1.9222e-08	-1.56e-08	-1.5322e-08	-1.092e-08	-2.6743e-09	0	-8.1344e-09	-1.4764e-08	-2.2732e-08	-2.7356e-08	-2.9083e-08	-3.003e-08	-3.2482e-08	-3.4042e-08	-3.5323e-08	-3.7273e-08	-3.861e-08	-3.9836e-08	-4.1953e-08	-4.329e-08	-4.4015e-08	-4.5185e-08	-4.6522e-08	-4.8193e-08	-4.914e-08	-5.2149e-08	-5.0088e-08	-5.2372e-08	-5.538e-08	-5.499e-08	-6.0283e-08
2.1172e-08	1.716e-08	1.1756e-08	8.4686e-09	5.0143e-09	1.95e-09	-3.9e-10	-2.73e-09	-5.1258e-09	-7.6329e-09	-9.8058e-09	-1.1812e-08	-6.5743e-09	-1.3762e-08	-1.6213e-08	-1.8052e-08	-1.9946e-08	-2.1952e-08	-2.301e-08	-2.2899e-08	-1.8052e-08	-1.3316e-08	-1.5099e-08	-1.3706e-08	-1.1979e-08	-1.5767e-08	-2.223e-08	-2.7802e-08	-2.9195e-08	-3.0866e-08	-3.2426e-08	-3.3707e-08	-3.51e-08	-3.7273e-08	-3.9948e-08	-4.1452e-08	-4.1842e-08	-4.4182e-08	-4.5129e-08	-4.68e-08	-4.8305e-08	-4.9475e-08	-4.68e-08	-5.1982e-08	-5.3263e-08	-5.3932e-08	-5.4768e-08	-5.6049e-08	-5.7219e-08	-5.8333e-08
2.7969e-08	2.3957e-08	2.0336e-08	1.6826e-08	1.3817e-08	1.0697e-08	7.9115e-09	5.7386e-09	2.8972e-09	8.9144e-10	-2.1172e-09	-2.34e-09	6.8529e-09	-1.17e-09	-6.2401e-09	-8.1901e-09	-9.0815e-09	-1.092e-08	-1.0474e-08	-1.2759e-08	-1.7327e-08	-1.7884e-08	-1.6492e-08	-1.4542e-08	-1.1644e-08	-1.5266e-08	-2.2063e-08	-2.262e-08	-2.3846e-08	-2.5072e-08	-2.8637e-08	-2.9752e-08	-3.2482e-08	-3.3206e-08	-3.5546e-08	-3.7385e-08	-3.7997e-08	-4.0449e-08	-4.2343e-08	-4.2845e-08	-4.4238e-08	-4.6132e-08	-4.7079e-08	-4.8528e-08	-4.8973e-08	-5.0088e-08	-5.1759e-08	-5.3709e-08	-5.4378e-08	-5.5715e-08
3.2816e-08	2.4236e-08	1.8832e-08	1.5823e-08	1.2202e-08	9.7501e-09	6.4629e-09	4.5129e-09	1.0586e-09	-1.0586e-09	-3.1757e-09	-4.4015e-09	-5.7386e-09	-6.7972e-09	-9.4158e-09	-1.0809e-08	-1.1589e-08	-1.3483e-08	-1.4764e-08	-1.6714e-08	-1.794e-08	-1.9166e-08	-2.0893e-08	-1.911e-08	-1.1366e-08	-1.5322e-08	-2.3567e-08	-2.4236e-08	-2.5295e-08	-2.6799e-08	-2.9139e-08	-3.0309e-08	-3.1925e-08	-3.3262e-08	-3.4599e-08	-3.6382e-08	-3.2872e-08	-2.4403e-08	-3.471e-08	-3.8109e-08	-3.9112e-08	-4.1173e-08	-4.2956e-08	-3.8053e-08	-4.3068e-08	-4.719e-08	-4.8583e-08	-5.031e-08	-5.1258e-08	-5.3542e-08
3.1423e-08	2.6687e-08	2.2564e-08	2.2787e-08	2.0503e-08	1.5712e-08	1.8497e-08	1.6436e-08	1.0307e-08	6.4629e-09	5.2929e-09	4.0115e-09	-3.3429e-10	-1.17e-09	-4.1786e-09	-6.2401e-09	-8.7472e-09	-9.9172e-09	-1.1756e-08	-1.2703e-08	-1.443e-08	-1.6324e-08	-1.7494e-08	-1.9389e-08	-1.6269e-08	-2.2787e-08	-2.4626e-08	-2.5573e-08	-2.0002e-08	-2.6186e-08	-2.7356e-08	-2.8637e-08	-3.0532e-08	-3.2036e-08	-3.3707e-08	-3.5045e-08	-3.4822e-08	-3.354e-08	-3.5156e-08	-3.705e-08	-3.8555e-08	-3.978e-08	-3.471e-08	-3.5323e-08	-3.5212e-08	-4.0393e-08	-4.2176e-08	-4.3402e-08	-4.3792e-08	-4.4572e-08
3.2927e-08	2.808e-08	2.4069e-08	2.184e-08	2.3679e-08	2.0614e-08	2.1004e-08	2.0002e-08	1.7884e-08	1.4932e-08	6.5743e-09	1.56e-09	2.7857e-09	3.3429e-09	-5.4043e-09	-3.6772e-09	-9.6387e-09	-1.014e-08	-5.3486e-09	-1.0363e-08	-1.2424e-08	-1.5656e-08	-1.794e-08	-1.9277e-08	-2.0949e-08	-2.2509e-08	-2.496e-08	-2.5907e-08	-2.7245e-08	-2.8526e-08	-2.9863e-08	-3.159e-08	-3.315e-08	-3.4766e-08	-3.5546e-08	-3.7329e-08	-3.8666e-08	-3.9948e-08	-4.1396e-08	-4.2343e-08	-4.2343e-08	-4.4795e-08	-4.5965e-08	-4.7803e-08	-4.9252e-08	-4.953e-08	-5.0533e-08	-5.1759e-08	-4.5018e-08	-3.8332e-08
3.9112e-08	3.354e-08	2.9306e-08	2.4626e-08	2.0893e-08	2.301e-08	2.3846e-08	2.4125e-08	2.3344e-08	2.4125e-08	1.7383e-08	1.1644e-08	1.6826e-08	1.2536e-08	4.4572e-09	9.4715e-10	-2.7857e-10	4.1229e-09	8.3015e-09	8.0229e-09	3.6215e-09	-4.1786e-09	-7.8558e-09	-9.1372e-09	-8.9144e-09	-1.2814e-08	-1.443e-08	-1.5656e-08	-1.7383e-08	-1.9779e-08	-2.0169e-08	-2.3289e-08	-2.3846e-08	-2.5517e-08	-2.6966e-08	-2.8916e-08	-3.0365e-08	-3.1367e-08	-3.2927e-08	-3.3875e-08	-3.6047e-08	-3.6493e-08	-3.237e-08	-4.0783e-08	-4.1563e-08	-4.2566e-08	-4.3848e-08	-4.5575e-08	-4.6745e-08	-4.1229e-08
3.2927e-08	2.73e-08	2.4292e-08	2.1339e-08	1.755e-08	1.4709e-08	2.1283e-08	2.7857e-08	2.574e-08	2.3456e-08	2.1506e-08	1.6436e-08	1.1533e-08	4.8472e-09	1.2814e-09	5.0143e-10	-9.4715e-10	3.1757e-09	7.6886e-09	5.46e-09	5.4043e-09	-8.9144e-10	-7.5772e-09	-1.2926e-08	-1.4096e-08	-1.56e-08	-1.7216e-08	-1.8664e-08	-2.0837e-08	-2.3177e-08	-2.3902e-08	-2.5016e-08	-2.6743e-08	-2.8247e-08	-2.9417e-08	-3.1312e-08	-3.354e-08	-3.4766e-08	-3.5657e-08	-3.6772e-08	-3.8499e-08	-3.9279e-08	-4.0449e-08	-4.2232e-08	-4.3012e-08	-4.4015e-08	-4.4516e-08	-4.7748e-08	-4.8193e-08	-4.9308e-08
3.9836e-08	3.1033e-08	2.7412e-08	2.3623e-08	2.0113e-08	1.7439e-08	1.716e-08	2.1339e-08	1.5322e-08	1.1199e-08	1.0753e-08	8.3572e-09	2.2286e-09	3.3429e-10	-1.1143e-09	-2.3957e-09	-4.3458e-09	-6.9643e-09	-6.2401e-09	-8.4686e-09	-1.1143e-08	-1.443e-08	-1.6492e-08	-1.7662e-08	-1.9389e-08	-2.0336e-08	-2.1784e-08	-2.3734e-08	-2.496e-08	-2.6687e-08	-2.769e-08	-2.2787e-08	-2.5907e-08	-2.8136e-08	-2.9752e-08	-3.0699e-08	-3.3317e-08	-3.1869e-08	-3.2872e-08	-3.7496e-08	-3.9167e-08	-3.9335e-08	-4.1062e-08	-4.3903e-08	-4.4906e-08	-4.5853e-08	-4.7469e-08	-4.7859e-08	-5.0366e-08	-5.1815e-08
1.8776e-08	1.2647e-08	8.7472e-09	4.68e-09	2.3957e-09	-5.5715e-11	-2.73e-09	-6.0172e-09	-8.4129e-09	-1.1143e-08	-1.3037e-08	-1.4709e-08	-1.6659e-08	-1.0419e-08	-1.0586e-08	-2.1172e-08	-2.3512e-08	-2.535e-08	-2.73e-08	-2.9975e-08	-3.1757e-08	-3.3485e-08	-3.4877e-08	-3.6382e-08	-3.7719e-08	-3.9223e-08	-4.0783e-08	-4.173e-08	-4.3235e-08	-4.4739e-08	-4.6076e-08	-4.212e-08	-3.8666e-08	-4.6355e-08	-4.8249e-08	-4.992e-08	-5.1425e-08	-5.304e-08	-5.4155e-08	-5.3932e-08	-4.797e-08	-4.9029e-08	-5.3486e-08	-5.5548e-08	-5.6718e-08	-5.8055e-08	-5.9113e-08	-6.2735e-08	-6.0785e-08	-6.4518e-08
1.6436e-08	1.0753e-08	9.1929e-09	7.6329e-09	2.0614e-09	2.0614e-09	-3.9e-09	-6.2958e-09	-8.9144e-09	-1.1032e-08	-1.3316e-08	-1.5322e-08	-1.6157e-08	-1.9723e-08	-2.1283e-08	-2.3122e-08	-2.5127e-08	-2.6799e-08	-2.8693e-08	-3.0197e-08	-3.1479e-08	-2.7523e-08	-3.3429e-08	-3.5713e-08	-3.7385e-08	-3.8889e-08	-4.0003e-08	-4.1619e-08	-4.3068e-08	-4.4238e-08	-4.5798e-08	-4.4906e-08	-4.1508e-08	-4.6076e-08	-4.5018e-08	-4.7135e-08	-5.3096e-08	-5.3653e-08	-5.2706e-08	-4.5742e-08	-3.6159e-08	-3.7162e-08	-4.6578e-08	-5.2762e-08	-5.4823e-08	-5.6161e-08	-5.7163e-08	-5.9002e-08	-6.0339e-08	-6.2958e-08
2.3456e-08	1.833e-08	1.5266e-08	1.599e-08	1.0029e-08	7.8558e-09	5.1258e-09	1.8943e-09	-6.6858e-10	-2.9529e-09	-4.7915e-09	-4.7358e-09	-7.0201e-09	-7.9672e-09	-1.1032e-08	-1.2703e-08	-1.4653e-08	-1.6324e-08	-1.8442e-08	-1.989e-08	-2.106e-08	-2.2564e-08	-2.4236e-08	-2.6409e-08	-2.7746e-08	-2.8972e-08	-3.0142e-08	-3.1813e-08	-3.3206e-08	-3.4153e-08	-3.5992e-08	-3.7162e-08	-3.4487e-08	-3.6716e-08	-4.1842e-08	-4.1508e-08	-4.2845e-08	-4.2956e-08	-4.1786e-08	-3.12e-08	-2.1617e-08	-2.0169e-08	-2.4626e-08	-3.3485e-08	-4.095e-08	-4.5519e-08	-4.7023e-08	-4.8528e-08	-5.0756e-08	-4.9976e-08
3.9948e-08	3.5323e-08	3.0365e-08	2.1116e-08	1.7104e-08	1.4374e-08	1.1254e-08	1.0809e-08	6.7415e-09	5.2929e-09	3.4543e-09	5.5715e-10	-8.9144e-10	-3.0643e-09	-4.7915e-09	-6.7972e-09	-8.0229e-09	-9.6387e-09	-1.1589e-08	-1.326e-08	-1.4653e-08	-1.6492e-08	-1.8052e-08	-1.7439e-08	-1.872e-08	-2.0893e-08	-2.2342e-08	-2.4013e-08	-1.5934e-08	-2.4626e-08	-2.574e-08	-2.496e-08	-2.7412e-08	-2.9139e-08	-3.0643e-08	-2.8136e-08	-3.1423e-08	-3.159e-08	-2.1952e-08	-1.5934e-08	-1.2592e-08	-1.1812e-08	-1.2257e-08	-1.4486e-08	-2.2564e-08	-3.3429e-08	-3.9056e-08	-4.0505e-08	-4.017e-08	-4.1229e-08
3.5323e-08	3.0977e-08	2.9139e-08	2.3289e-08	2.106e-08	1.7996e-08	1.4709e-08	1.2647e-08	1.0029e-08	7.8558e-09	5.9615e-09	6.7972e-09	2.5072e-09	1.6157e-09	-1.3372e-09	-3.12e-09	-4.5686e-09	-6.3515e-09	-8.2458e-09	-8.9144e-09	-1.0419e-08	-1.2424e-08	-1.3929e-08	-1.56e-08	-1.7327e-08	-1.8664e-08	-2.0169e-08	-2.0447e-08	-2.223e-08	-2.3679e-08	-2.5016e-08	-2.6019e-08	-2.7356e-08	-2.8693e-08	-2.808e-08	-2.8749e-08	-2.9975e-08	-2.9195e-08	-1.9333e-08	-1.3929e-08	-1.1366e-08	-1.0196e-08	-6.5186e-09	-8.5801e-09	-2.1506e-08	-2.8749e-08	-3.198e-08	-3.3875e-08	-3.5267e-08	-3.6326e-08
4.1786e-08	3.744e-08	3.354e-08	3.042e-08	3.1479e-08	2.4236e-08	2.2119e-08	1.9723e-08	2.3902e-08	1.95e-08	1.1812e-08	9.3601e-09	6.8529e-09	4.9586e-09	3.0643e-09	2.0057e-09	7.8001e-10	-1.0586e-09	-1.95e-09	-1.17e-09	-2.5072e-09	-6.6858e-10	-4.0115e-09	-9.1929e-09	-1.014e-08	-1.1923e-08	-1.1923e-08	-1.404e-08	-1.5322e-08	-1.6492e-08	-1.7494e-08	-1.7829e-08	-1.9556e-08	-2.0837e-08	-2.184e-08	-2.2174e-08	-2.3679e-08	-2.4459e-08	-2.5406e-08	-2.0726e-08	-1.1533e-08	-1.0474e-08	-1.1422e-08	-1.3093e-08	-1.95e-08	-2.1394e-08	-2.5183e-08	-2.6297e-08	-2.7579e-08	-2.8749e-08
7.6886e-09	2.5072e-09	-2.0614e-09	-5.4043e-09	-5.4043e-09	-1.0976e-08	-1.3984e-08	-1.599e-08	-1.6324e-08	-1.794e-08	-2.2063e-08	-2.4626e-08	-2.691e-08	-2.8526e-08	-3.0253e-08	-3.1757e-08	-3.3206e-08	-3.4766e-08	-3.6716e-08	-3.7775e-08	-2.9083e-08	-2.4292e-08	-2.9696e-08	-4.0783e-08	-4.5909e-08	-4.7413e-08	-4.875e-08	-5.0533e-08	-5.2372e-08	-5.3152e-08	-5.46e-08	-5.5826e-08	-5.7163e-08	-5.8501e-08	-6.0116e-08	-6.0952e-08	-6.2233e-08	-6.4183e-08	-6.5298e-08	-6.5632e-08	-5.8445e-08	-6.1676e-08	-6.4351e-08	-6.6078e-08	-6.6691e-08	-6.5855e-08	-6.4462e-08	-7.0033e-08	-7.1148e-08	-7.2374e-08
1.1143e-09	-1.3427e-08	-1.2814e-08	-1.2814e-08	-1.4207e-08	-1.5934e-08	-1.7439e-08	-1.9333e-08	-1.638e-08	-1.8442e-08	-2.0726e-08	-2.2342e-08	-2.1283e-08	-2.3567e-08	-2.5239e-08	-2.7523e-08	-2.9473e-08	-3.1033e-08	-3.276e-08	-3.3707e-08	-1.2814e-08	-2.7857e-10	-6.9086e-09	-1.9779e-08	-2.4292e-08	-2.5295e-08	-2.7133e-08	-2.9807e-08	-3.3095e-08	-3.3485e-08	-3.5546e-08	-3.6493e-08	-3.8332e-08	-3.9557e-08	-4.0672e-08	-4.2343e-08	-4.329e-08	-4.4349e-08	-4.5798e-08	-5.0088e-08	-5.1592e-08	-5.2539e-08	-5.3319e-08	-5.4433e-08	-5.5993e-08	-5.4823e-08	-5.2706e-08	-5.9893e-08	-6.0896e-08	-6.1453e-08
1.1533e-08	4.0672e-09	5.5715e-11	-3.12e-09	-6.2401e-09	-9.7501e-09	-1.2313e-08	-1.4207e-08	-1.5879e-08	-1.8442e-08	-2.1283e-08	-2.3289e-08	-2.5239e-08	-2.7077e-08	-2.9083e-08	-3.1089e-08	-3.2816e-08	-3.4543e-08	-3.432e-08	-2.925e-08	-1.7717e-08	-4.4572e-10	-8.6915e-09	-2.613e-08	-3.4989e-08	-3.666e-08	-3.7496e-08	-3.861e-08	-4.0616e-08	-4.1953e-08	-4.4126e-08	-4.368e-08	-4.7302e-08	-4.9809e-08	-5.0868e-08	-5.226e-08	-5.3208e-08	-5.4545e-08	-5.6049e-08	-5.7163e-08	-5.9058e-08	-6.0339e-08	-6.1286e-08	-6.3236e-08	-6.4406e-08	-6.3905e-08	-6.3181e-08	-6.6746e-08	-6.9031e-08	-6.7303e-08
2.3344e-08	1.4987e-08	1.131e-08	1.1533e-08	7.0758e-09	3.1757e-09	6.7972e-09	1.0029e-08	4.8472e-09	-4.9586e-09	-6.9643e-09	-9.6387e-09	-1.1533e-08	-1.4876e-08	-1.6046e-08	-1.794e-08	-1.8386e-08	-2.2119e-08	-2.3846e-08	-1.9277e-08	-1.5377e-08	-4.4015e-09	-1.0363e-08	-2.7746e-08	-3.3485e-08	-3.4822e-08	-3.5992e-08	-3.7663e-08	-3.8889e-08	-4.0003e-08	-3.8945e-08	-4.1619e-08	-4.4126e-08	-4.485e-08	-4.017e-08	-4.6243e-08	-4.7302e-08	-4.8806e-08	-4.992e-08	-5.1146e-08	-5.2038e-08	-5.1982e-08	-5.0088e-08	-4.8695e-08	-4.4683e-08	-5.3486e-08	-5.7999e-08	-6.0283e-08	-6.0841e-08	-6.1788e-08
2.9195e-08	2.3734e-08	1.9834e-08	1.6102e-08	1.4709e-08	1.6436e-08	1.9054e-08	1.0586e-08	6.0172e-09	3.6215e-09	1.95e-09	3.9e-10	-2.3957e-09	-4.29e-09	-8.0229e-09	-8.6915e-09	-1.1533e-08	-1.3037e-08	-1.5099e-08	-1.0419e-08	-1.1589e-08	-8.3572e-09	-1.6046e-08	-2.2843e-08	-2.3846e-08	-2.5685e-08	-2.7189e-08	-2.8359e-08	-2.9863e-08	-3.1367e-08	-3.2482e-08	-3.3986e-08	-3.5992e-08	-3.6939e-08	-3.822e-08	-3.9112e-08	-3.9e-08	-4.1563e-08	-4.2956e-08	-4.3513e-08	-4.3625e-08	-3.7719e-08	-2.8637e-08	-2.613e-08	-2.8136e-08	-3.9335e-08	-4.212e-08	-4.4906e-08	-4.602e-08	-4.6745e-08
2.2787e-08	1.7439e-08	1.3427e-08	9.9729e-09	7.6886e-09	9.8615e-09	2.2286e-09	-9.4715e-10	-2.5072e-09	-3.9e-09	6.7415e-09	1.8052e-08	5.5158e-09	-6.0172e-09	-1.1199e-08	-1.5433e-08	-1.7327e-08	-1.9389e-08	-2.1116e-08	-2.2843e-08	-2.4793e-08	-2.3734e-08	-2.8192e-08	-3.0309e-08	-3.159e-08	-3.3262e-08	-2.8526e-08	-3.4097e-08	-3.6103e-08	-3.7663e-08	-3.9112e-08	-3.8499e-08	-4.1396e-08	-4.2733e-08	-4.407e-08	-4.5463e-08	-4.6745e-08	-4.7803e-08	-4.8639e-08	-5.0088e-08	-5.1313e-08	-4.7413e-08	-4.29e-08	-4.2009e-08	-4.602e-08	-5.3263e-08	-5.4823e-08	-5.6551e-08	-5.8612e-08	-5.9671e-08
3.2705e-08	2.769e-08	2.5072e-08	2.1673e-08	1.8999e-08	1.5099e-08	1.5154e-08	1.1087e-08	9.8615e-09	7.9672e-09	2.0113e-08	5.0645e-08	1.677e-08	7.1872e-09	4.1229e-09	1.95e-09	2.2286e-10	-2.6743e-09	-4.29e-09	-5.6829e-09	-7.5772e-09	-8.6915e-09	-9.9729e-09	-1.1533e-08	-1.3037e-08	-1.404e-08	-1.7272e-08	-2.067e-08	-2.2564e-08	-2.2732e-08	-2.5016e-08	-2.613e-08	-2.7857e-08	-2.9975e-08	-3.1312e-08	-3.2482e-08	-3.3875e-08	-3.5267e-08	-3.6995e-08	-3.8276e-08	-3.8889e-08	-4.173e-08	-4.3402e-08	-4.3346e-08	-4.4572e-08	-4.5519e-08	-4.641e-08	-4.8082e-08	-4.9419e-08	-5.0812e-08
3.0922e-08	2.535e-08	2.1729e-08	1.8497e-08	1.5656e-08	1.2034e-08	1.0084e-08	7.7444e-09	6.0729e-09	5.1815e-09	1.092e-08	1.2814e-09	5.3486e-09	8.3572e-10	8.3572e-10	-2.1172e-09	-2.5072e-09	-7.1315e-09	-1.0586e-08	-1.1143e-08	-1.2703e-08	-1.4709e-08	-1.6269e-08	-1.7996e-08	-1.95e-08	-1.6436e-08	-2.0057e-08	-2.34e-08	-2.7635e-08	-2.7857e-08	-2.9362e-08	-3.0866e-08	-3.2705e-08	-3.3707e-08	-3.5546e-08	-3.4487e-08	-3.8387e-08	-4.017e-08	-4.2065e-08	-4.2232e-08	-4.5296e-08	-4.6466e-08	-4.68e-08	-4.7692e-08	-4.8806e-08	-5.0032e-08	-5.1759e-08	-5.2873e-08	-5.4545e-08	-5.5826e-08
3.3262e-08	2.7802e-08	2.34e-08	1.9779e-08	1.6492e-08	1.5154e-08	1.8609e-08	1.8107e-08	1.131e-08	7.9672e-09	4.4572e-09	3.5657e-09	8.3572e-10	-1.5043e-09	-2.8972e-09	-3.5657e-09	-6.5186e-09	-6.5186e-09	-4.0672e-09	-9.5272e-09	-1.287e-08	-1.2759e-08	-1.6213e-08	-1.7717e-08	-1.8664e-08	-2.0113e-08	-2.2564e-08	-2.2342e-08	-2.184e-08	-2.2342e-08	-2.4682e-08	-2.5016e-08	-2.6297e-08	-2.7635e-08	-2.7802e-08	-2.0169e-08	-1.1979e-08	-7.5772e-09	-7.5772e-09	-1.6882e-08	-2.4292e-08	-2.9807e-08	-3.1535e-08	-3.2872e-08	-3.2983e-08	-3.198e-08	-3.3373e-08	-4.0059e-08	-4.1229e-08	-4.0728e-08
3.8777e-08	3.3039e-08	2.8247e-08	2.4849e-08	2.1562e-08	1.872e-08	2.2397e-08	2.4905e-08	1.6659e-08	1.2034e-08	1.1143e-08	8.8029e-09	5.0143e-09	4.0672e-09	1.3929e-09	-1.7829e-09	-2.3957e-09	-4.2343e-09	-5.6272e-09	-9.4158e-09	-1.0586e-08	-1.1867e-08	-1.3594e-08	-1.4653e-08	-1.6603e-08	-1.7773e-08	-1.9277e-08	-2.0782e-08	-1.8107e-08	-1.5767e-08	-2.0057e-08	-1.8497e-08	-2.0392e-08	-1.287e-08	-2.0057e-08	-8.1344e-09	-1.2814e-09	4.9586e-09	-1.989e-08	-1.9277e-08	-2.9473e-08	-2.2787e-08	-2.4849e-08	-2.7133e-08	-2.7857e-08	-3.0587e-08	-3.3819e-08	-3.5156e-08	-3.5657e-08	-3.6995e-08
1.8887e-08	1.3762e-08	1.3539e-08	8.1901e-09	4.1229e-09	1.2814e-09	2.0614e-09	2.8972e-09	-8.9144e-10	-3.7329e-09	-9.4715e-09	-1.248e-08	-1.4319e-08	-1.6492e-08	-1.8497e-08	-2.0336e-08	-2.2954e-08	-2.4013e-08	-2.34e-08	-2.808e-08	-2.9975e-08	-3.1702e-08	-3.3095e-08	-3.0532e-08	-3.3986e-08	-3.939e-08	-4.0616e-08	-4.2176e-08	-3.8666e-08	-4.4795e-08	-4.5463e-08	-4.6856e-08	-4.7859e-08	-4.3792e-08	-4.8416e-08	-4.1842e-08	-3.2147e-08	-2.4236e-08	-2.3122e-08	-3.0977e-08	-4.6689e-08	-5.0979e-08	-5.4322e-08	-5.4935e-08	-5.6105e-08	-5.7609e-08	-5.8668e-08	-6.0395e-08	-6.3292e-08	-6.4016e-08
1.5968e-07	1.5455e-07	1.4898e-07	1.4497e-07	1.4174e-07	1.3923e-07	1.375e-07	1.3583e-07	1.326e-07	1.3266e-07	1.277e-07	1.2419e-07	1.2174e-07	1.1951e-07	1.1778e-07	1.1622e-07	1.141e-07	1.1227e-07	1.1087e-07	1.1282e-07	1.0831e-07	1.0736e-07	1.0642e-07	1.0642e-07	1.0413e-07	1.0179e-07	9.9897e-08	9.9562e-08	9.8225e-08	9.8058e-08	9.4771e-08	9.4325e-08	9.2932e-08	9.1372e-08	9.0147e-08	9.6331e-08	9.6554e-08	9.3824e-08	9.0258e-08	8.5856e-08	8.2792e-08	8.1344e-08	8.0452e-08	7.9115e-08	7.7834e-08	7.7221e-08	7.6106e-08	7.5605e-08	7.3544e-08	7.2931e-08
2.2286e-08	1.8107e-08	1.3316e-08	1.0084e-08	7.2986e-09	3.6215e-09	6.7415e-09	8.2458e-09	6.6858e-10	-3.12e-09	-5.6272e-09	-7.7444e-09	-1.0084e-08	-1.2257e-08	-1.1533e-08	-1.6492e-08	-1.8386e-08	-2.028e-08	-2.2063e-08	-2.3177e-08	-2.2007e-08	-1.5377e-08	-9.6387e-09	-1.8442e-08	-2.535e-08	-2.7802e-08	-2.9195e-08	-3.0253e-08	-3.2537e-08	-3.471e-08	-3.5435e-08	-3.7719e-08	-3.8053e-08	-3.9167e-08	-4.1508e-08	-4.0616e-08	-4.1953e-08	-3.7942e-08	-4.0839e-08	-4.6132e-08	-4.6522e-08	-4.8026e-08	-5.0088e-08	-5.3208e-08	-5.3375e-08	-5.5102e-08	-5.4266e-08	-5.3319e-08	-5.8055e-08	-5.9169e-08
2.2843e-08	1.6882e-08	1.2313e-08	8.4686e-09	5.6272e-09	4.68e-09	1.6714e-09	5.2929e-09	9.4715e-10	-3.8443e-09	-6.2958e-09	-8.3572e-09	-3.0086e-09	7.4101e-09	5.7943e-09	-3.9e-09	-7.8001e-10	-4.4572e-09	-1.326e-08	-1.4597e-08	-1.2592e-08	-3.7886e-09	-2.34e-09	-1.1477e-08	-2.0224e-08	-2.2732e-08	-2.379e-08	-2.5295e-08	-2.73e-08	-2.9195e-08	-3.2092e-08	-3.1869e-08	-3.0699e-08	-3.7719e-08	-4.0059e-08	-4.0616e-08	-4.0338e-08	-3.7385e-08	-3.822e-08	-4.3235e-08	-4.446e-08	-4.5296e-08	-4.641e-08	-4.0728e-08	-4.5129e-08	-3.9e-08	-3.3039e-08	-3.3373e-08	-4.3513e-08	-5.0088e-08
2.9807e-08	2.418e-08	2.028e-08	1.6102e-08	1.2982e-08	1.014e-08	8.2458e-09	6.1286e-09	2.7857e-09	1.0029e-09	-1.7829e-09	-3.8443e-09	-5.6272e-09	1.0586e-09	6.9086e-09	2.1172e-09	-3.4543e-09	-8.5801e-09	-1.3316e-08	-1.4653e-08	-1.5934e-08	-1.1422e-08	-9.7501e-09	-1.6937e-08	-2.0002e-08	-2.0893e-08	-2.3177e-08	-2.5295e-08	-2.7022e-08	-2.7133e-08	-2.2676e-08	-2.1506e-08	-2.9027e-08	-3.1702e-08	-3.0086e-08	-3.7552e-08	-3.6605e-08	-3.354e-08	-3.8666e-08	-4.173e-08	-4.2733e-08	-4.3458e-08	-4.4683e-08	-4.5463e-08	-4.6188e-08	-3.3317e-08	-2.4905e-08	-2.691e-08	-3.7496e-08	-4.7246e-08
2.7857e-08	2.2286e-08	1.755e-08	1.4096e-08	1.1366e-08	8.4686e-09	5.5158e-09	5.9058e-09	1.0586e-09	-6.1286e-10	-2.8415e-09	-4.68e-09	-3.51e-09	-5.1258e-09	-3.2872e-09	-3.4543e-09	-4.68e-09	-1.0196e-08	-1.3762e-08	-1.7662e-08	-1.872e-08	-2.0726e-08	-2.2174e-08	-2.223e-08	-2.3177e-08	-2.535e-08	-2.8805e-08	-3.0197e-08	-2.9417e-08	-2.1896e-08	-1.8943e-08	-2.3679e-08	-3.198e-08	-3.2203e-08	-3.4766e-08	-3.7273e-08	-3.5546e-08	-3.432e-08	-3.9948e-08	-4.2232e-08	-4.329e-08	-4.485e-08	-4.6132e-08	-4.68e-08	-4.1508e-08	-3.3262e-08	-3.0197e-08	-3.2593e-08	-4.3402e-08	-4.875e-08
2.6743e-08	2.0614e-08	1.6882e-08	1.326e-08	1.0307e-08	7.2986e-09	4.4015e-09	1.7272e-09	-7.2429e-10	-2.7857e-09	-4.8472e-09	-6.9643e-09	-8.6915e-09	-1.0586e-08	-1.248e-08	-1.3762e-08	-1.5656e-08	-1.6603e-08	-1.1756e-08	-2.7857e-10	-2.5072e-09	-6.0172e-09	-9.1929e-09	-1.4152e-08	-1.3037e-08	-1.0252e-08	-1.1477e-08	-1.755e-08	-2.2286e-08	-2.1562e-08	-2.4737e-08	-2.301e-08	-2.028e-08	-2.2397e-08	-2.3177e-08	-2.3567e-08	-2.4125e-08	-3.0476e-08	-3.354e-08	-3.4265e-08	-3.1535e-08	-3.939e-08	-4.0059e-08	-4.1118e-08	-4.1786e-08	-4.1173e-08	-3.6047e-08	-3.7942e-08	-4.4238e-08	-4.5352e-08
2.3289e-08	1.9556e-08	1.1923e-08	5.46e-09	2.1729e-09	-6.1286e-10	-3.2872e-09	-5.4043e-09	-2.2843e-09	-9.1372e-09	-1.4764e-08	-1.6603e-08	-1.8776e-08	-2.1004e-08	-2.2954e-08	-2.4403e-08	-2.5907e-08	-2.7913e-08	-1.8052e-08	-8.6358e-09	-1.4932e-08	-2.7412e-08	-2.5685e-08	-2.5685e-08	-3.2203e-08	-3.0922e-08	-3.2259e-08	-3.7663e-08	-3.9112e-08	-4.0728e-08	-4.2399e-08	-4.407e-08	-4.5296e-08	-4.6745e-08	-4.6912e-08	-4.329e-08	-4.4795e-08	-5.031e-08	-5.1982e-08	-5.4099e-08	-5.5603e-08	-5.7331e-08	-5.8668e-08	-6.0061e-08	-6.1509e-08	-6.2902e-08	-6.3236e-08	-6.3236e-08	-6.6356e-08	-6.7415e-08
3.7162e-08	3.1089e-08	2.5852e-08	1.9779e-08	1.5154e-08	1.2146e-08	1.1979e-08	5.07e-09	3.4543e-09	5.8501e-09	5.0143e-10	-5.1815e-09	-7.3544e-09	-7.5215e-09	-8.4686e-09	-1.0864e-08	-1.1254e-08	-1.5322e-08	-6.4072e-09	-3.3429e-09	-5.3486e-09	-1.5934e-08	-1.9222e-08	-1.8776e-08	-2.0336e-08	-2.4905e-08	-2.7412e-08	-2.8359e-08	-3.042e-08	-3.2482e-08	-3.3596e-08	-3.471e-08	-3.5323e-08	-3.8332e-08	-3.9557e-08	-4.1173e-08	-4.329e-08	-4.4238e-08	-4.5352e-08	-4.5686e-08	-3.978e-08	-4.3792e-08	-4.992e-08	-5.1202e-08	-5.2316e-08	-5.3765e-08	-5.5213e-08	-5.0255e-08	-3.003e-08	-5.1313e-08
5.7275e-08	5.1536e-08	4.5185e-08	3.7106e-08	2.8972e-08	2.5796e-08	1.8609e-08	1.6046e-08	1.4207e-08	1.1477e-08	1.521e-08	1.989e-08	1.2369e-08	4.68e-09	3.2315e-09	1.6714e-09	2.7857e-10	-6.1286e-10	-6.8529e-09	-3.7886e-09	-7.4658e-09	-1.2926e-08	-1.3706e-08	-1.56e-08	-1.8107e-08	-1.9222e-08	-2.1339e-08	-2.262e-08	-2.3734e-08	-2.2397e-08	-2.6409e-08	-2.7579e-08	-2.925e-08	-3.042e-08	-3.2482e-08	-3.3039e-08	-2.7802e-08	-3.2593e-08	-3.5156e-08	-3.6772e-08	-3.5379e-08	-3.9669e-08	-4.1675e-08	-4.2678e-08	-4.4015e-08	-4.5296e-08	-4.5519e-08	-4.7413e-08	-4.5686e-08	-4.8138e-08
6.3738e-08	5.7386e-08	4.4962e-08	3.354e-08	3.0532e-08	2.7913e-08	2.6019e-08	2.3066e-08	1.7494e-08	1.6046e-08	1.3427e-08	1.5099e-08	9.1929e-09	5.4043e-09	3.9e-09	4.4572e-10	-8.9144e-10	-4.8472e-09	-5.7943e-09	-9.8058e-09	-1.1032e-08	-8.9701e-09	-1.4764e-08	-1.6547e-08	-1.7829e-08	-1.9166e-08	-1.9277e-08	-1.8497e-08	-2.4236e-08	-2.691e-08	-2.6966e-08	-2.8637e-08	-2.9027e-08	-3.0532e-08	-3.2203e-08	-3.354e-08	-3.4877e-08	-3.6605e-08	-3.8053e-08	-3.9223e-08	-4.0393e-08	-3.9892e-08	-4.3402e-08	-4.4906e-08	-4.6355e-08	-4.7915e-08	-4.8528e-08	-4.9252e-08	-5.0422e-08	-5.1815e-08
8.4742e-08	7.7834e-08	6.3459e-08	5.6161e-08	5.2038e-08	4.9085e-08	4.641e-08	4.3792e-08	4.3402e-08	3.8109e-08	3.5602e-08	3.3707e-08	3.159e-08	2.9696e-08	2.7579e-08	2.9306e-08	3.1702e-08	2.8805e-08	2.3957e-08	2.2286e-08	1.8553e-08	1.6826e-08	1.5656e-08	1.3817e-08	1.2257e-08	1.2202e-08	1.7494e-08	2.1172e-08	1.3093e-08	1.6213e-08	7.0201e-09	5.8501e-09	3.9e-09	2.2286e-09	8.9144e-10	-5.0143e-10	-1.0586e-09	-4.5686e-09	-6.2401e-09	-7.5215e-09	-6.7415e-09	-1.0196e-08	-1.1422e-08	-1.287e-08	-1.404e-08	-1.5154e-08	-1.5879e-08	-1.5879e-08	-1.7383e-08	-1.8107e-08
9.4882e-08	8.9645e-08	8.7584e-08	8.0341e-08	7.8056e-08	7.4658e-08	7.2151e-08	6.9811e-08	6.7693e-08	7.0089e-08	6.9142e-08	6.1621e-08	5.9782e-08	5.7052e-08	5.4768e-08	5.3876e-08	5.4433e-08	5.0199e-08	4.7525e-08	4.5519e-08	4.4405e-08	4.3235e-08	4.134e-08	4.0059e-08	3.9279e-08	3.7886e-08	3.8499e-08	3.8945e-08	3.5546e-08	3.2092e-08	3.1089e-08	3.0699e-08	2.9807e-08	2.8136e-08	2.6576e-08	2.5517e-08	2.4292e-08	2.3177e-08	2.106e-08	2.0002e-08	1.9556e-08	1.8497e-08	1.7494e-08	1.638e-08	1.4932e-08	1.3594e-08	1.248e-08	1.092e-08	1.0029e-08	9.3601e-09
3.0755e-08	2.1227e-08	1.8107e-08	1.5266e-08	1.4319e-08	8.4129e-09	9.0258e-09	2.2286e-09	3.9e-10	-1.7272e-09	-3.3429e-09	-6.2958e-09	-7.1315e-09	-7.4101e-09	-4.4015e-09	-8.4129e-09	-1.2647e-08	-1.4374e-08	-1.6157e-08	-1.5823e-08	-2.0113e-08	-2.0782e-08	-2.1227e-08	-1.6993e-08	-2.1562e-08	-2.5239e-08	-3.0142e-08	-2.9529e-08	-3.1646e-08	-3.3373e-08	-3.4432e-08	-3.6159e-08	-3.2705e-08	-3.1869e-08	-3.1367e-08	-3.6159e-08	-3.822e-08	-3.9167e-08	-4.0226e-08	-4.0505e-08	-3.8276e-08	-4.1173e-08	-4.1396e-08	-4.8806e-08	-4.992e-08	-5.0923e-08	-5.1648e-08	-5.2539e-08	-5.4099e-08	-5.4879e-08
1.7177e-07	1.8737e-07	1.5678e-07	1.1828e-07	9.2988e-08	-8.1901e-09	-1.8163e-08	-8.6915e-09	-9.2487e-09	-9.8615e-09	-1.1979e-08	-1.3483e-08	-1.4374e-08	-1.6492e-08	-1.7829e-08	-1.8163e-08	-2.0614e-08	-2.1562e-08	-1.6046e-08	-2.0837e-08	-2.2843e-08	-2.4069e-08	-2.6075e-08	-2.7579e-08	-2.8693e-08	-3.0086e-08	-3.081e-08	-3.1813e-08	-3.12e-08	-3.4655e-08	-3.5936e-08	-3.7775e-08	-3.627e-08	-2.8749e-08	-2.6799e-08	-3.2203e-08	-3.5936e-08	-3.6939e-08	-3.8276e-08	-3.9446e-08	-3.9948e-08	-4.1619e-08	-4.3513e-08	-4.4906e-08	-4.6355e-08	-4.7748e-08	-4.8528e-08	-4.9363e-08	-5.0923e-08	-4.8026e-08
5.4823e-08	4.9586e-08	4.5463e-08	4.2176e-08	4.407e-08	4.0616e-08	3.3986e-08	3.471e-08	2.9195e-08	2.7077e-08	2.5016e-08	2.8693e-08	2.2174e-08	2.7356e-08	2.5517e-08	1.6826e-08	1.4932e-08	1.2647e-08	1.0753e-08	1.1923e-08	1.521e-08	7.1872e-09	4.9586e-09	4.7915e-09	7.8558e-09	3.9557e-09	2.34e-09	7.2429e-10	-1.6157e-09	-2.0614e-09	-3.51e-09	-4.8472e-09	-5.3486e-09	-8.0786e-09	-8.0229e-09	-1.0196e-08	-1.1477e-08	-1.248e-08	-1.2814e-08	-1.3762e-08	-1.5767e-08	-1.5767e-08	-1.17e-08	-1.5322e-08	-1.8776e-08	-2.0559e-08	-1.638e-08	-1.794e-08	-1.638e-08	-1.443e-08
4.3123e-08	3.7942e-08	3.354e-08	3.0142e-08	2.6576e-08	2.4292e-08	2.1339e-08	1.9667e-08	1.8887e-08	1.6659e-08	1.3149e-08	1.0586e-08	9.5829e-09	7.5215e-09	5.6272e-09	5.0143e-09	3.5657e-09	1.8386e-09	-2.2286e-10	-2.2843e-09	-5.0143e-10	-3.1757e-09	-5.6829e-09	-7.0758e-09	-7.8558e-09	-9.8615e-09	-1.1143e-08	-1.2759e-08	-1.4207e-08	-1.521e-08	-1.6714e-08	-1.5322e-08	-1.8943e-08	-1.989e-08	-2.1394e-08	-2.2007e-08	-2.3512e-08	-2.2119e-08	-1.638e-08	-2.2397e-08	-2.3567e-08	-2.496e-08	-2.1617e-08	-2.6075e-08	-3.0253e-08	-2.5629e-08	-2.7635e-08	-3.2927e-08	-3.1869e-08	-2.4682e-08
1.9667e-08	1.5544e-08	1.0753e-08	5.6829e-09	2.8415e-09	1.1143e-10	-2.5072e-09	-4.7358e-09	-7.6329e-09	-1.1032e-08	-1.2202e-08	-1.4319e-08	-1.5879e-08	-1.716e-08	-1.7773e-08	-2.0782e-08	-2.2342e-08	-2.2676e-08	-2.5462e-08	-2.6465e-08	-2.8526e-08	-3.0309e-08	-3.1813e-08	-3.315e-08	-3.4766e-08	-3.5936e-08	-3.7385e-08	-3.8833e-08	-3.9279e-08	-4.0449e-08	-4.2009e-08	-4.3625e-08	-4.4293e-08	-4.6132e-08	-4.7413e-08	-4.7859e-08	-4.9029e-08	-5.0478e-08	-5.2706e-08	-5.2038e-08	-4.8528e-08	-5.1313e-08	-5.2428e-08	-5.3263e-08	-5.5938e-08	-5.6606e-08	-5.7999e-08	-5.9893e-08	-6.0451e-08	-6.1565e-08
2.0938e-07	2.0486e-07	2.0358e-07	1.979e-07	1.9222e-07	1.8748e-07	1.8419e-07	1.6492e-07	1.0084e-07	-1.7662e-08	-2.652e-08	-2.7857e-08	-8.0229e-09	-2.0949e-08	-3.8722e-08	-5.3542e-08	-5.4879e-08	-5.5492e-08	-5.6773e-08	-5.5548e-08	-3.4432e-08	-1.2257e-08	-2.5573e-08	-5.3598e-08	-6.7805e-08	-5.2205e-08	-5.1536e-08	-4.173e-08	-4.5798e-08	-4.7135e-08	-4.8806e-08	-5.0088e-08	-5.1202e-08	-5.1035e-08	-5.0478e-08	-4.251e-08	-4.9085e-08	-7.3488e-08	-5.3988e-08	-4.5352e-08	-4.9419e-08	-6.5688e-08	-8.8698e-08	-8.5411e-08	-8.2736e-08	-8.1344e-08	-5.5603e-08	-6.2902e-08	-5.3263e-08	-7.7555e-08
2.0197e-07	1.9483e-07	1.8024e-07	1.7338e-07	1.6603e-07	1.618e-07	1.5895e-07	1.5533e-07	1.5383e-07	1.5149e-07	1.4854e-07	1.4558e-07	1.4904e-07	1.472e-07	1.4497e-07	1.4074e-07	1.3951e-07	1.3723e-07	1.3617e-07	1.36e-07	1.3945e-07	1.3895e-07	1.3355e-07	1.282e-07	1.2692e-07	1.2575e-07	1.2748e-07	1.2207e-07	1.2374e-07	1.2118e-07	1.1761e-07	1.1611e-07	1.1488e-07	1.1383e-07	1.1193e-07	1.1059e-07	1.1004e-07	1.1578e-07	1.1661e-07	1.1455e-07	1.1087e-07	1.0608e-07	1.0385e-07	1.0291e-07	1.014e-07	1.0057e-07	1.0218e-07	1.0408e-07	1.0257e-07	9.6999e-08
6.2401e-08	6.2958e-08	4.7302e-08	4.9196e-08	3.9e-08	2.7356e-08	3.6772e-08	3.5602e-08	4.1786e-09	1.7272e-08	1.053e-08	6.3515e-09	4.2343e-09	1.7829e-09	6.1286e-09	-2.7857e-10	-1.17e-09	-2.3957e-09	-3.0643e-09	-4.29e-09	4.1786e-09	1.2424e-08	7.5215e-09	-2.73e-09	-4.5686e-09	-9.6944e-09	-1.1756e-08	-1.3093e-08	-1.092e-08	-1.3984e-08	-1.9612e-08	-2.2063e-08	-2.3512e-08	-2.5295e-08	-2.6743e-08	-2.8136e-08	-2.8526e-08	-1.4207e-08	-4.6243e-09	-2.6242e-08	-2.3623e-08	-2.4292e-08	-3.0476e-08	-3.003e-08	-2.7523e-08	-3.4989e-08	-3.7552e-08	-3.6493e-08	-2.9752e-08	-3.4933e-08
1.477e-07	1.4274e-07	1.3678e-07	1.2926e-07	1.1968e-07	1.0508e-07	9.7835e-08	1.0079e-07	9.8838e-08	9.0927e-08	8.4464e-08	8.0006e-08	7.5326e-08	7.4268e-08	7.2596e-08	6.9588e-08	6.7805e-08	6.6468e-08	6.3069e-08	6.1565e-08	6.1342e-08	6.1955e-08	5.4935e-08	5.3208e-08	5.1815e-08	5.0199e-08	4.8528e-08	4.7469e-08	4.5965e-08	4.4516e-08	4.4182e-08	4.6132e-08	4.2065e-08	4.056e-08	4.0115e-08	3.9056e-08	3.8053e-08	4.758e-08	5.2706e-08	5.0533e-08	4.3569e-08	3.666e-08	3.3986e-08	3.3485e-08	3.198e-08	3.0866e-08	2.9473e-08	2.8303e-08	3.5323e-08	4.6856e-08
6.7638e-08	6.5743e-08	6.1676e-08	5.4378e-08	4.7135e-08	4.0003e-08	3.5267e-08	3.042e-08	2.9752e-08	2.9362e-08	2.9696e-08	2.7412e-08	1.8386e-08	1.248e-08	1.4207e-08	1.8163e-08	6.0729e-09	4.0115e-09	1.2257e-09	-1.3929e-09	-3.2315e-09	-2.0614e-09	-1.2814e-09	-7.0758e-09	-9.7501e-09	-1.0976e-08	-1.2592e-08	-1.2926e-08	-1.6102e-08	-1.7606e-08	-1.8999e-08	-2.028e-08	-2.34e-08	-2.3957e-08	-2.5072e-08	-2.6409e-08	-2.8637e-08	-3.0142e-08	-3.1089e-08	-3.2092e-08	-3.3763e-08	-3.5602e-08	-3.588e-08	-3.7217e-08	-3.4042e-08	-3.7496e-08	-3.9446e-08	-4.0115e-08	-4.1285e-08	-3.2259e-08
4.4293e-08	3.8889e-08	3.51e-08	3.1757e-08	3.0532e-08	2.9139e-08	2.2676e-08	2.0614e-08	1.872e-08	1.6046e-08	1.4709e-08	2.2342e-08	2.0336e-08	1.5433e-08	1.8776e-08	1.6269e-08	6.6858e-09	2.9529e-09	5.6272e-09	2.6743e-09	-1.2257e-09	1.2814e-09	-2.73e-09	-3.2872e-09	-9.5272e-09	-1.092e-08	-1.1923e-08	-1.4207e-08	-1.6826e-08	-1.7996e-08	-1.9054e-08	-1.7104e-08	-1.6492e-08	-2.4013e-08	-2.5462e-08	-2.6465e-08	-2.6075e-08	-3.1033e-08	-3.2315e-08	-3.3429e-08	-3.4265e-08	-3.5435e-08	-3.6437e-08	-3.8053e-08	-3.9502e-08	-3.5323e-08	-3.9836e-08	-4.1006e-08	-4.212e-08	-4.2956e-08
4.0505e-07	1.7361e-07	1.3232e-07	1.4285e-07	4.056e-08	-2.5629e-09	2.1729e-09	7.8001e-09	9.5272e-09	7.8001e-09	6.1286e-09	1.0753e-08	7.3544e-09	1.1143e-09	0	-4.4572e-10	-4.5129e-09	-5.6272e-09	-7.1872e-09	-9.4158e-09	-8.2458e-09	-9.6944e-09	-1.2647e-08	-1.053e-08	-1.5489e-08	-1.6826e-08	-1.7884e-08	-1.9222e-08	-2.0559e-08	-2.2007e-08	-2.2843e-08	-2.223e-08	-1.8163e-08	-1.3929e-08	-1.2536e-08	-1.4987e-08	-1.7884e-08	-2.535e-08	-2.6297e-08	-2.6799e-08	-3.0699e-08	-3.0977e-08	-3.2315e-08	-3.2482e-08	-3.0643e-08	-3.1869e-08	-3.9223e-08	-3.9613e-08	-4.1229e-08	-4.2176e-08
2.925e-08	2.3957e-08	1.95e-08	1.716e-08	1.2647e-08	1.014e-08	7.6886e-09	5.4043e-09	2.2843e-09	7.8001e-10	-1.0586e-09	-2.5072e-09	-4.5129e-09	-6.6858e-09	-8.4686e-09	-1.0363e-08	-1.053e-08	-1.3372e-08	-9.7501e-09	-6.7972e-09	-1.4542e-08	-1.7327e-08	-1.8999e-08	-2.0392e-08	-2.1729e-08	-2.3456e-08	-2.4905e-08	-2.6242e-08	-2.8303e-08	-2.8916e-08	-3.0476e-08	-3.0977e-08	-3.081e-08	-1.8553e-08	-7.6886e-09	-1.0474e-08	-2.2732e-08	-2.7523e-08	-2.9529e-08	-2.9696e-08	-2.6799e-08	-2.5183e-08	-1.2592e-08	-1.1644e-08	-1.8442e-08	-2.964e-08	-3.6437e-08	-4.0616e-08	-4.3235e-08	-4.4628e-08
5.4322e-08	4.8639e-08	4.4628e-08	4.4349e-08	3.8443e-08	3.549e-08	3.2315e-08	2.9919e-08	2.7579e-08	2.5127e-08	2.2899e-08	2.0614e-08	1.8497e-08	1.6603e-08	1.5266e-08	1.3316e-08	1.1756e-08	1.0084e-08	7.8558e-09	6.1286e-09	1.0419e-08	1.1032e-08	4.1229e-09	3.51e-09	8.8587e-09	1.95e-09	-3.9e-10	-1.95e-09	-3.2872e-09	-4.7915e-09	-2.9529e-09	-5.3486e-09	-5.8501e-09	5.2929e-09	1.599e-08	7.4101e-09	-3.3986e-09	-4.9586e-09	2.8972e-09	7.3544e-09	9.1372e-09	1.7606e-08	2.0782e-08	1.6492e-08	8.9144e-09	-5.6272e-09	-8.2458e-09	-1.209e-08	-1.9166e-08	-2.2063e-08
2.6242e-08	2.0782e-08	1.7216e-08	1.911e-08	1.209e-08	8.8587e-09	6.6858e-09	2.34e-09	3.9e-10	2.7857e-10	-3.9e-09	-5.8501e-09	-8.2458e-09	-8.9144e-09	-1.1477e-08	-1.3483e-08	-1.5656e-08	-1.4319e-08	-7.4101e-09	-1.5656e-08	-1.6547e-08	-1.8943e-08	-2.1562e-08	-2.2676e-08	-2.1952e-08	-1.7996e-08	-2.5852e-08	-2.6966e-08	-2.7969e-08	-2.964e-08	-2.7857e-08	-3.0142e-08	-3.4042e-08	-2.886e-08	-2.2954e-08	-2.8526e-08	-3.3986e-08	-3.588e-08	-3.7329e-08	-3.1702e-08	-2.457e-08	-1.8219e-08	-1.7104e-08	-2.1116e-08	-3.042e-08	-4.1006e-08	-4.407e-08	-4.7692e-08	-5.0366e-08	-5.148e-08
3.0142e-08	2.6075e-08	2.1339e-08	1.755e-08	1.9834e-08	1.677e-08	1.404e-08	8.9144e-09	7.8558e-09	9.5272e-09	5.9615e-09	1.7829e-09	2.2286e-10	-1.7829e-09	-4.5686e-09	-5.1258e-09	-7.4101e-09	-5.4043e-09	-4.8472e-09	-1.3037e-08	-1.3093e-08	-1.4374e-08	-1.6213e-08	-1.7383e-08	-2.0113e-08	-2.1617e-08	-2.3846e-08	-2.4793e-08	-2.6186e-08	-2.769e-08	-2.6687e-08	-2.7077e-08	-3.2593e-08	-3.51e-08	-3.6047e-08	-3.6883e-08	-3.7496e-08	-3.588e-08	-3.3819e-08	-3.5657e-08	-3.549e-08	-3.1813e-08	-3.4432e-08	-3.8499e-08	-3.9613e-08	-4.0226e-08	-4.1452e-08	-4.2789e-08	-4.3736e-08	-4.5686e-08
5.2093e-08	4.8583e-08	4.2009e-08	3.588e-08	3.2983e-08	2.808e-08	2.5796e-08	2.3122e-08	2.5016e-08	2.2732e-08	1.7327e-08	1.0029e-08	8.5244e-09	6.2958e-09	3.2315e-09	1.8943e-09	5.5715e-11	-1.3929e-09	-3.12e-09	-4.4572e-09	-6.0729e-09	-7.9115e-09	-1.014e-08	-1.1923e-08	-1.2982e-08	-1.3984e-08	-1.5879e-08	-1.6269e-08	-1.9444e-08	-2.067e-08	-2.1617e-08	-2.3122e-08	-2.418e-08	-2.5517e-08	-2.7077e-08	-2.8582e-08	-3.0142e-08	-3.1256e-08	-3.3485e-08	-3.4766e-08	-3.5212e-08	-3.6493e-08	-3.5267e-08	-4.017e-08	-4.1006e-08	-4.2232e-08	-4.3848e-08	-4.3346e-08	-4.3346e-08	-4.7692e-08
7.7611e-08	7.2596e-08	6.3849e-08	4.8639e-08	3.6716e-08	3.2983e-08	2.9863e-08	2.6687e-08	2.6465e-08	2.5072e-08	1.8386e-08	1.6714e-08	1.5154e-08	1.287e-08	1.0419e-08	8.7472e-09	6.8529e-09	5.9058e-09	5.0143e-09	1.3372e-09	7.2429e-10	2.2286e-10	-3.9557e-09	-5.07e-09	-6.7415e-09	-7.9115e-09	-9.7501e-09	-1.131e-08	-1.3093e-08	-1.4207e-08	-1.5656e-08	-1.6882e-08	-1.5043e-08	-1.56e-08	-2.0169e-08	-2.1673e-08	-1.5712e-08	-1.6826e-08	-2.2843e-08	-2.3623e-08	-2.5127e-08	-2.6743e-08	-2.808e-08	-2.9417e-08	-3.0977e-08	-3.1702e-08	-2.7802e-08	-3.4766e-08	-3.6382e-08	-3.7775e-08
9.6052e-08	9.4882e-08	7.8391e-08	7.2039e-08	6.3459e-08	5.148e-08	4.29e-08	5.1536e-08	4.8416e-08	4.2678e-08	3.7997e-08	3.2927e-08	3.0922e-08	3.4376e-08	2.8192e-08	2.0726e-08	1.9556e-08	1.7272e-08	1.4319e-08	1.7383e-08	1.1867e-08	8.7472e-09	4.9029e-09	3.1757e-09	1.8943e-09	9.4715e-10	1.6714e-10	-1.6714e-09	-3.2872e-09	-1.4486e-09	-3.6215e-09	-4.7358e-09	-7.6886e-09	-9.1372e-09	-9.5272e-09	-1.053e-08	-1.1867e-08	-1.2703e-08	-1.5934e-08	-1.5712e-08	-1.9389e-08	-2.1116e-08	-2.2509e-08	-2.4905e-08	-2.1952e-08	-1.1087e-08	-1.5489e-08	-2.2954e-08	-2.535e-08	-2.4793e-08
8.9701e-08	8.5188e-08	8.1344e-08	7.4268e-08	6.1398e-08	4.2733e-08	3.4265e-08	3.1423e-08	2.8749e-08	2.8582e-08	3.4432e-08	3.159e-08	2.3066e-08	2.4459e-08	1.9333e-08	1.2257e-08	1.0084e-08	8.0229e-09	5.5158e-09	4.2343e-09	2.8972e-09	2.7857e-09	-8.3572e-10	4.6243e-09	1.0252e-08	5.9058e-09	-2.8415e-09	-4.7915e-09	-6.4629e-09	-4.9586e-09	-4.5686e-09	-1.1199e-08	-1.482e-08	-1.6937e-08	-1.8052e-08	-1.9389e-08	-2.0949e-08	-2.2286e-08	-2.3567e-08	-2.2732e-08	-2.5239e-08	-2.7022e-08	-2.3289e-08	-2.1116e-08	-2.1004e-08	-1.5879e-08	-1.5767e-08	-2.3066e-08	-2.9083e-08	-3.0142e-08
5.2706e-08	4.5408e-08	4.5519e-08	4.4293e-08	3.6549e-08	2.9529e-08	2.1896e-08	2.3679e-08	2.5852e-08	1.5489e-08	2.0113e-08	1.1422e-08	3.3986e-09	6.7415e-09	6.3515e-09	4.29e-09	1.7829e-09	4.0115e-09	-5.5715e-11	-4.5129e-09	-5.2372e-09	1.6157e-09	-3.9e-09	-1.1143e-09	4.1786e-09	-1.6157e-09	2.3957e-09	-1.8497e-08	-8.0786e-09	-7.0201e-09	-8.0786e-09	-1.1143e-08	-1.8052e-08	-1.8943e-08	-2.7245e-08	-2.9195e-08	-2.9696e-08	-3.1423e-08	-3.2092e-08	-3.1925e-08	-3.2649e-08	-3.7273e-08	-3.8443e-08	-3.8387e-08	-3.1646e-08	-2.5685e-08	-3.1367e-08	-3.9613e-08	-3.4989e-08	-3.7273e-08
2.7077e-08	2.1283e-08	1.7272e-08	1.2703e-08	9.2487e-09	1.0864e-08	6.6858e-09	2.8415e-09	8.3572e-10	-5.0143e-10	-2.0614e-09	-3.7329e-09	-6.2401e-09	-7.0758e-09	-1.0029e-08	-1.1199e-08	-1.3037e-08	-9.4158e-09	-4.0115e-09	-1.5377e-08	-1.6269e-08	-9.9729e-09	-1.3706e-08	-1.0586e-09	7.8001e-09	1.0084e-08	2.4515e-09	-1.2982e-08	-2.1673e-08	-2.3344e-08	-2.4849e-08	-2.9473e-08	-3.159e-08	-2.886e-08	-3.4487e-08	-3.7329e-08	-3.7997e-08	-3.6995e-08	-3.5657e-08	-4.1563e-08	-4.446e-08	-4.3179e-08	-4.7302e-08	-4.6745e-08	-3.744e-08	-3.1925e-08	-3.0365e-08	-4.0059e-08	-4.407e-08	-4.8305e-08
2.1729e-08	1.7327e-08	1.1589e-08	8.5801e-09	5.3486e-09	6.1843e-09	5.2372e-09	3.0643e-09	-4.7358e-09	-8.3015e-09	-8.5801e-09	-1.287e-08	-1.4653e-08	-1.5934e-08	-1.6659e-08	-1.7104e-08	-2.0169e-08	-1.5489e-08	-1.1644e-08	-2.0949e-08	-2.3344e-08	-2.5239e-08	-2.6687e-08	-2.3567e-08	-1.3817e-08	-8.3572e-09	-1.2926e-08	-2.4905e-08	-2.9696e-08	-3.1757e-08	-3.2259e-08	-2.652e-08	-3.0365e-08	-3.6827e-08	-3.51e-08	-4.1396e-08	-4.2399e-08	-4.251e-08	-3.6716e-08	-4.485e-08	-5.0923e-08	-4.9308e-08	-5.3263e-08	-4.953e-08	-4.2009e-08	-4.329e-08	-5.0032e-08	-5.5548e-08	-5.5603e-08	-5.7498e-08
1.6492e-08	1.3316e-08	9.1929e-09	3.6772e-09	1.1143e-10	-2.5629e-09	-4.0115e-09	-1.6714e-10	-8.0229e-09	-1.0586e-08	-1.3372e-08	-1.5767e-08	-1.7662e-08	-2.0113e-08	-2.0893e-08	-2.1227e-08	-2.3734e-08	-5.9058e-09	-1.17e-09	-1.6492e-08	-2.3233e-08	-2.5127e-08	-2.6855e-08	-2.8359e-08	-3.0866e-08	-3.237e-08	-3.5936e-08	-3.8053e-08	-3.5323e-08	-3.0365e-08	-2.2063e-08	-1.56e-08	-1.716e-08	-2.7746e-08	-3.9223e-08	-4.2622e-08	-4.4405e-08	-4.5463e-08	-4.6466e-08	-4.9642e-08	-5.0868e-08	-5.1759e-08	-4.9698e-08	-4.8528e-08	-4.7915e-08	-5.1369e-08	-5.8055e-08	-5.9503e-08	-5.8779e-08	-6.2568e-08
1.8887e-08	1.3539e-08	1.3037e-08	1.0642e-08	1.0196e-08	3.12e-09	-1.1143e-09	-4.9586e-09	-7.3544e-09	-9.2487e-09	-1.1366e-08	-1.3149e-08	-1.482e-08	-1.6882e-08	-1.8553e-08	-1.6714e-08	-1.7049e-08	-1.7439e-08	-3.9e-09	-1.1644e-08	-2.0726e-08	-2.4013e-08	-2.5183e-08	-2.652e-08	-2.8582e-08	-3.042e-08	-3.1033e-08	-3.315e-08	-3.3262e-08	-3.4097e-08	-1.8219e-08	-1.3093e-08	-1.4542e-08	-2.4013e-08	-3.7607e-08	-4.0783e-08	-4.2232e-08	-4.3848e-08	-4.5352e-08	-4.7302e-08	-5.031e-08	-5.0366e-08	-5.1703e-08	-5.0422e-08	-5.3932e-08	-5.7888e-08	-5.8612e-08	-5.9671e-08	-6.1342e-08	-6.4128e-08
3.7106e-08	3.0977e-08	2.6409e-08	2.8916e-08	2.7412e-08	2.1004e-08	2.106e-08	1.248e-08	9.1929e-09	1.0419e-08	5.7943e-09	6.5186e-09	5.6829e-09	1.3929e-09	2.2286e-10	-1.6157e-09	-2.8972e-09	-5.5158e-09	-7.0758e-09	-7.1872e-09	-9.1929e-09	-1.053e-08	-1.3149e-08	-1.4987e-08	-1.6046e-08	-1.7829e-08	-1.8386e-08	-1.9723e-08	-2.262e-08	-2.3177e-08	-1.8107e-08	-1.1589e-08	-1.0084e-08	-1.755e-08	-2.1673e-08	-2.2676e-08	-2.4403e-08	-2.574e-08	-2.3567e-08	-3.2203e-08	-3.2315e-08	-3.042e-08	-2.7579e-08	-3.4209e-08	-4.017e-08	-4.1118e-08	-4.2176e-08	-4.2845e-08	-4.1953e-08	-4.6912e-08
2.7189e-08	2.1227e-08	1.7049e-08	1.3149e-08	9.6387e-09	7.4658e-09	4.2343e-09	2.1172e-09	-1.0029e-09	-3.5657e-09	-4.7915e-09	-6.2958e-09	-8.5244e-09	-1.0363e-08	-1.092e-08	-1.1979e-08	-1.2982e-08	-1.0864e-08	-2.2286e-10	5.5158e-09	1.7272e-09	-4.8472e-09	-1.2257e-08	-1.911e-08	-2.2397e-08	-2.3233e-08	-2.3957e-08	-2.4347e-08	-2.7746e-08	-2.9195e-08	-2.9919e-08	-3.3373e-08	-3.6437e-08	-3.4097e-08	-3.9892e-08	-4.1173e-08	-3.7942e-08	-3.7329e-08	-3.8499e-08	-4.407e-08	-4.4962e-08	-4.5686e-08	-4.7079e-08	-4.8973e-08	-4.9809e-08	-5.1425e-08	-5.1926e-08	-4.9419e-08	-4.446e-08	-4.3569e-08
3.7886e-08	3.4209e-08	2.7523e-08	2.4125e-08	2.067e-08	1.8163e-08	1.5322e-08	1.2982e-08	9.9729e-09	8.0786e-09	5.5158e-09	3.6215e-09	2.1729e-09	4.4572e-10	-1.3929e-09	-3.51e-09	-2.5629e-09	1.3037e-08	3.1312e-08	3.6605e-08	3.12e-08	2.2007e-08	1.5099e-08	3.7329e-09	-1.3483e-08	-1.5767e-08	-1.7327e-08	-2.0392e-08	-2.2174e-08	-2.301e-08	-2.457e-08	-2.6019e-08	-2.7746e-08	-2.9863e-08	-3.081e-08	-3.0587e-08	-1.7383e-08	-1.5879e-08	-2.106e-08	-3.1256e-08	-3.2203e-08	-3.4042e-08	-3.5212e-08	-3.4376e-08	-3.7663e-08	-3.9557e-08	-4.0059e-08	-4.1285e-08	-4.1786e-08	-3.237e-08
4.5018e-08	3.9112e-08	3.4989e-08	3.1702e-08	2.9027e-08	2.5796e-08	2.3122e-08	2.1896e-08	1.7606e-08	1.5823e-08	1.4152e-08	1.2424e-08	1.0586e-08	8.8029e-09	7.0758e-09	7.1872e-09	1.2536e-08	2.0113e-08	3.3763e-08	3.822e-08	3.1813e-08	1.7884e-08	3.3986e-09	-2.6743e-09	-3.6215e-09	-4.8472e-09	-2.7857e-09	3.12e-09	-6.6858e-10	-8.6915e-09	-1.1087e-08	-1.17e-08	-1.365e-08	-1.5544e-08	-1.677e-08	-1.5823e-08	-4.0672e-09	3.3429e-09	-7.2429e-10	-1.6659e-08	-2.2453e-08	-2.3734e-08	-2.4737e-08	-2.5685e-08	-2.7523e-08	-2.9027e-08	-3.237e-08	-2.8303e-08	-3.4265e-08	-3.6437e-08
3.8777e-08	3.4376e-08	2.9417e-08	2.5462e-08	2.2954e-08	1.9834e-08	1.6492e-08	1.3594e-08	1.092e-08	8.8029e-09	7.0758e-09	4.8472e-09	2.8972e-09	1.17e-09	-2.7857e-10	2.3957e-09	9.8058e-09	9.5829e-09	1.0419e-08	1.131e-08	5.1815e-09	-4.29e-09	-5.6272e-09	-1.248e-08	-1.56e-08	-1.7717e-08	-1.5154e-08	1.053e-08	1.7773e-08	-3.51e-09	-1.5823e-08	-1.872e-08	-2.1506e-08	-2.4069e-08	-2.6186e-08	-2.7857e-08	-2.8247e-08	-2.0447e-08	-2.0726e-08	-3.042e-08	-3.4042e-08	-3.6159e-08	-3.6939e-08	-3.8053e-08	-3.978e-08	-3.7273e-08	-3.822e-08	-4.5073e-08	-4.4683e-08	-4.7915e-08
3.5657e-08	3.042e-08	2.7077e-08	2.4905e-08	2.1004e-08	1.7662e-08	1.5154e-08	1.248e-08	9.5272e-09	7.5215e-09	5.46e-09	3.2315e-09	2.0614e-09	1.5043e-09	4.0115e-09	2.3957e-09	2.7857e-10	-3.1757e-09	-4.4572e-09	-5.9615e-09	-7.7444e-09	-9.5272e-09	-3.0086e-09	1.7272e-09	-5.0143e-10	-1.7829e-09	-4.8472e-09	2.8136e-08	2.9863e-08	9.1372e-09	-1.2647e-08	-1.7773e-08	-1.9779e-08	-2.145e-08	-2.3289e-08	-2.4682e-08	-2.5573e-08	-2.7579e-08	-3.2315e-08	-3.51e-08	-3.6103e-08	-3.705e-08	-3.7997e-08	-3.9056e-08	-4.0115e-08	-4.173e-08	-3.9112e-08	-4.29e-08	-4.4795e-08	-4.6132e-08
4.2065e-08	3.6103e-08	3.159e-08	2.7969e-08	2.5629e-08	2.3177e-08	2.262e-08	1.7606e-08	1.6269e-08	1.4263e-08	1.1533e-08	9.8058e-09	8.1901e-09	8.5801e-09	1.5712e-08	9.5829e-09	9.1372e-09	4.6243e-09	2.8415e-09	1.8943e-09	-5.0143e-10	3.12e-09	1.56e-08	1.95e-08	9.6944e-09	-3.51e-09	2.1172e-09	2.9975e-08	3.4766e-08	1.4653e-08	-4.4572e-09	-1.5377e-08	-2.0559e-08	-2.1729e-08	-2.3122e-08	-2.3679e-08	-2.5852e-08	-2.9195e-08	-3.0309e-08	-3.1367e-08	-3.2147e-08	-2.7913e-08	-2.7133e-08	-3.4042e-08	-3.549e-08	-3.6827e-08	-3.6382e-08	-3.6939e-08	-4.1563e-08	-4.2956e-08
4.446e-08	3.9892e-08	3.588e-08	3.5546e-08	3.5713e-08	2.9027e-08	2.5629e-08	2.1172e-08	1.9333e-08	1.755e-08	1.4152e-08	1.2982e-08	1.209e-08	1.7049e-08	1.9444e-08	1.2926e-08	7.1315e-09	1.0864e-08	8.8029e-09	1.6714e-10	-5.5715e-10	0	1.794e-08	2.0224e-08	5.9615e-09	-4.8472e-09	8.9144e-10	1.8052e-08	2.1339e-08	6.9086e-09	-9.8058e-09	-1.4152e-08	-1.6213e-08	-1.716e-08	-1.911e-08	-2.0392e-08	-2.0224e-08	-2.2954e-08	-2.9027e-08	-3.0142e-08	-2.8916e-08	-2.4737e-08	-2.9195e-08	-3.3763e-08	-3.4822e-08	-3.6215e-08	-3.7719e-08	-3.8666e-08	-4.0338e-08	-4.2288e-08
2.0002e-08	1.4486e-08	1.0976e-08	1.2814e-08	1.0307e-08	9.0815e-09	6.6301e-09	8.0786e-09	6.0729e-09	1.56e-09	-5.2372e-09	-6.4072e-09	-4.2343e-09	-8.6915e-09	-1.2592e-08	-1.3594e-08	-1.8999e-08	-1.8609e-08	-1.1254e-08	-2.2453e-08	-2.2453e-08	-2.4347e-08	-1.5489e-08	-1.17e-08	-2.2564e-08	-2.808e-08	-2.3957e-08	-1.2424e-08	-1.2982e-08	-2.4292e-08	-3.432e-08	-3.7106e-08	-3.7385e-08	-3.9836e-08	-4.2622e-08	-4.4349e-08	-4.4795e-08	-4.3346e-08	-4.914e-08	-4.6912e-08	-5.3152e-08	-5.6328e-08	-5.7665e-08	-5.9392e-08	-6.0729e-08	-6.0562e-08	-5.7943e-08	-6.0283e-08	-6.4852e-08	-5.8835e-08
4.8806e-08	4.2455e-08	3.8777e-08	3.6326e-08	3.5602e-08	3.3596e-08	3.2593e-08	4.1062e-08	4.3792e-08	4.0505e-08	3.4376e-08	2.3233e-08	1.8219e-08	1.2814e-08	1.092e-08	7.9672e-09	6.8529e-09	4.7358e-09	1.1143e-09	-9.4715e-10	-3.6215e-09	-4.9029e-09	-4.9029e-09	-1.6714e-09	-6.2958e-09	-8.5801e-09	-8.1901e-09	5.5715e-11	-2.6743e-09	-9.6387e-09	-1.3093e-08	-1.4709e-08	-1.6046e-08	-1.8887e-08	-2.0392e-08	-2.2954e-08	-2.1227e-08	-1.2146e-08	-1.17e-08	-2.1896e-08	-2.4125e-08	-2.5685e-08	-2.8916e-08	-3.0643e-08	-3.1423e-08	-3.2927e-08	-3.4265e-08	-3.5546e-08	-3.588e-08	-3.939e-08
3.237e-08	2.73e-08	2.3512e-08	2.4069e-08	2.0224e-08	1.3316e-08	1.2647e-08	1.7606e-08	2.9362e-08	3.2315e-08	2.3344e-08	6.5743e-09	1.0586e-09	-8.3572e-10	-3.2872e-09	-4.9586e-09	-2.4515e-09	3.2315e-09	4.0115e-09	5.0143e-09	-7.6329e-09	-1.2146e-08	-1.4653e-08	-1.6492e-08	-1.9389e-08	-2.0782e-08	-2.2899e-08	-1.8776e-08	-2.5239e-08	-2.8303e-08	-2.6242e-08	-2.8637e-08	-3.081e-08	-3.2927e-08	-3.0755e-08	-1.7829e-08	-1.7104e-08	-3.0142e-08	-2.3122e-08	-2.6019e-08	-3.5212e-08	-3.9056e-08	-4.0226e-08	-3.8276e-08	-4.2455e-08	-4.7748e-08	-4.8806e-08	-5.0088e-08	-5.1369e-08	-5.265e-08
3.6215e-08	3.4543e-08	4.0672e-08	4.212e-08	3.8387e-08	3.1813e-08	2.1394e-08	1.4319e-08	8.5244e-09	8.1901e-09	5.7386e-09	6.5186e-09	-1.56e-09	-5.1258e-09	-7.3544e-09	-7.1872e-09	-3.1757e-09	3.3429e-09	5.8501e-09	3.1757e-09	-7.9115e-09	-1.4932e-08	-1.6659e-08	-1.833e-08	-1.9333e-08	-2.0837e-08	-2.2564e-08	-2.5963e-08	-2.8247e-08	-3.1702e-08	-3.2983e-08	-3.5323e-08	-3.3819e-08	-3.5212e-08	-3.3095e-08	-2.4626e-08	-2.3846e-08	-3.4822e-08	-3.8443e-08	-4.0895e-08	-4.2455e-08	-4.6188e-08	-4.6243e-08	-4.7803e-08	-4.8862e-08	-5.0422e-08	-5.2149e-08	-5.3876e-08	-5.4712e-08	-5.6328e-08
5.5826e-08	5.6551e-08	6.0562e-08	5.8278e-08	5.1258e-08	4.3736e-08	3.3262e-08	2.457e-08	1.9054e-08	1.6492e-08	1.4096e-08	1.1589e-08	1.0029e-08	9.8615e-09	6.5186e-09	4.5686e-09	4.7358e-09	8.4129e-09	1.287e-08	8.7472e-09	3.9e-10	-4.5129e-09	-1.0029e-09	-6.9643e-09	-1.1199e-08	-1.287e-08	-1.443e-08	-1.5712e-08	-1.716e-08	-1.8274e-08	-1.989e-08	-2.0224e-08	-2.4069e-08	-2.496e-08	-2.067e-08	-2.7245e-08	-2.7969e-08	-2.7802e-08	-2.5406e-08	-3.1757e-08	-3.6047e-08	-3.744e-08	-3.8276e-08	-3.9557e-08	-4.095e-08	-4.3402e-08	-4.5073e-08	-4.6355e-08	-4.7302e-08	-4.7358e-08
6.0618e-08	6.3013e-08	6.7805e-08	6.5186e-08	5.9002e-08	4.7525e-08	3.5212e-08	2.9362e-08	2.2174e-08	2.028e-08	1.8052e-08	1.3762e-08	1.0809e-08	6.3515e-09	4.6243e-09	4.29e-09	0	-1.56e-09	-1.3929e-09	-4.68e-09	-7.0758e-09	-8.5801e-09	-1.0586e-09	-7.6329e-09	-1.2202e-08	-1.56e-08	-1.6714e-08	-1.7884e-08	-1.8999e-08	-2.1283e-08	-2.2453e-08	-2.379e-08	-2.3233e-08	-2.4069e-08	-2.6465e-08	-2.7913e-08	-2.9975e-08	-3.1535e-08	-3.2983e-08	-3.4042e-08	-3.5657e-08	-3.6883e-08	-3.7942e-08	-3.8833e-08	-3.1925e-08	-2.2342e-08	-2.7635e-08	-3.4822e-08	-3.666e-08	-3.9167e-08
5.0533e-08	4.9475e-08	5.6216e-08	6.0896e-08	5.4935e-08	3.8053e-08	2.6743e-08	2.184e-08	1.716e-08	1.5433e-08	1.8553e-08	1.5767e-08	6.8529e-09	4.8472e-09	3.3429e-09	1.1143e-09	-1.17e-09	-3.2315e-09	-4.5129e-09	-6.5743e-09	-8.0786e-09	-9.8615e-09	-1.0196e-08	-1.0753e-08	-1.3594e-08	-5.1258e-09	-9.5272e-09	-1.7662e-08	-1.833e-08	-2.0057e-08	-2.1562e-08	-2.2899e-08	-2.3066e-08	-2.6297e-08	-2.7077e-08	-2.8916e-08	-2.9696e-08	-3.1757e-08	-3.2816e-08	-3.4209e-08	-3.5657e-08	-3.705e-08	-3.5769e-08	-2.7412e-08	-1.2257e-08	-8.9701e-09	-1.8553e-08	-3.4265e-08	-3.6549e-08	-3.8053e-08
5.6272e-08	5.3653e-08	5.9893e-08	5.8835e-08	5.0756e-08	4.2678e-08	3.4487e-08	3.081e-08	3.003e-08	2.3957e-08	2.457e-08	2.1172e-08	1.599e-08	1.4207e-08	1.2536e-08	1.0084e-08	7.5772e-09	5.46e-09	4.0115e-09	2.5072e-09	1.4486e-09	-5.5715e-10	-2.4515e-09	-3.9557e-09	-5.46e-09	2.6186e-09	-2.3957e-09	-9.3044e-09	-1.0697e-08	-1.2257e-08	-1.3817e-08	-1.5322e-08	-1.677e-08	-1.8107e-08	-1.9444e-08	-2.028e-08	-2.1004e-08	-2.2453e-08	-2.3289e-08	-2.3177e-08	-2.4125e-08	-2.3344e-08	-2.4069e-08	-7.9672e-09	5.7386e-09	6.0729e-09	-6.1843e-09	-2.34e-08	-2.8637e-08	-3.0086e-08
4.6689e-08	3.8555e-08	3.4655e-08	3.081e-08	2.8136e-08	2.5127e-08	2.2899e-08	2.0559e-08	1.8052e-08	1.5934e-08	1.365e-08	1.1199e-08	8.9144e-09	6.8529e-09	5.07e-09	3.2315e-09	1.56e-09	2.2286e-10	-1.2814e-09	-7.2429e-10	-3.9557e-09	-2.1172e-09	-5.1815e-09	-5.5715e-10	1.1143e-10	-7.4101e-09	-8.3572e-09	-1.0307e-08	-1.1756e-08	-1.3316e-08	-1.5544e-08	-1.6937e-08	-1.794e-08	-1.8776e-08	-2.0002e-08	-1.7773e-08	-2.3177e-08	-2.2509e-08	-2.5295e-08	-2.0002e-08	-2.4793e-08	-2.6576e-08	-2.6465e-08	-1.2313e-08	-3.3429e-10	-1.1143e-09	-1.2034e-08	-2.4849e-08	-3.237e-08	-2.9807e-08
8.4129e-08	7.8446e-08	7.4212e-08	7.0368e-08	6.7192e-08	6.4462e-08	6.2122e-08	5.8668e-08	5.7052e-08	5.8723e-08	6.0005e-08	5.46e-08	5.1536e-08	4.9865e-08	4.9865e-08	5.4545e-08	5.2706e-08	4.4962e-08	4.173e-08	4.0003e-08	3.7719e-08	3.4822e-08	3.2315e-08	3.0866e-08	2.7802e-08	2.6799e-08	2.5852e-08	2.4125e-08	2.223e-08	2.0392e-08	1.8887e-08	1.7773e-08	1.6547e-08	1.8274e-08	1.989e-08	1.6492e-08	1.287e-08	1.1533e-08	1.2424e-08	9.8615e-09	8.6915e-09	6.7972e-09	8.1901e-09	1.5043e-08	2.4125e-08	1.9946e-08	9.5272e-09	5.7386e-09	2.4515e-09	4.8472e-09
8.7082e-08	8.1901e-08	7.7499e-08	7.3599e-08	7.0702e-08	7.0869e-08	6.9142e-08	6.3961e-08	6.1509e-08	6.1788e-08	6.1008e-08	5.5882e-08	5.4489e-08	5.5269e-08	6.1732e-08	6.9978e-08	6.4406e-08	5.3096e-08	4.8472e-08	4.5686e-08	4.3903e-08	4.2733e-08	4.1786e-08	4.3736e-08	4.212e-08	3.7552e-08	3.4432e-08	3.3262e-08	3.2705e-08	2.8025e-08	2.6409e-08	2.8972e-08	2.4403e-08	2.1172e-08	2.0169e-08	1.872e-08	1.7327e-08	1.6213e-08	1.5322e-08	1.4374e-08	1.2313e-08	1.1477e-08	1.0363e-08	7.9115e-09	1.6714e-08	1.443e-08	9.7501e-09	7.7444e-09	4.1786e-09	3.3429e-09
4.8528e-08	4.3235e-08	3.8833e-08	3.5379e-08	3.7775e-08	3.5825e-08	3.3206e-08	2.9473e-08	2.301e-08	1.9946e-08	1.7717e-08	1.521e-08	1.2926e-08	1.17e-08	2.0224e-08	2.5406e-08	1.4374e-08	5.5158e-09	3.9557e-09	1.7272e-09	7.2429e-10	6.6858e-09	8.3015e-09	8.8587e-09	2.6186e-09	-5.9615e-09	-7.9672e-09	-8.3015e-09	-7.6329e-09	-1.3427e-08	-1.5322e-08	-1.5823e-08	-1.5433e-08	-1.7717e-08	-1.8553e-08	-2.1617e-08	-1.9277e-08	-2.4626e-08	-2.5685e-08	-2.691e-08	-2.8303e-08	-2.9139e-08	-3.0977e-08	-3.0253e-08	-3.0197e-08	-2.9919e-08	-3.0476e-08	-2.9919e-08	-3.51e-08	-3.6883e-08
-6.2401e-09	-1.1756e-08	-1.6046e-08	-1.8943e-08	-2.1562e-08	-2.4403e-08	-2.1172e-08	-2.2453e-08	-2.3734e-08	-3.0086e-08	-3.198e-08	-3.2872e-08	-3.4097e-08	-2.0782e-08	-2.4515e-09	4.3458e-09	-2.8415e-09	-1.9723e-08	-2.7802e-08	-3.6827e-08	-4.1396e-08	-4.2956e-08	-3.2537e-08	-2.9919e-08	-3.8165e-08	-4.7079e-08	-4.836e-08	-5.1369e-08	-5.5826e-08	-5.8278e-08	-5.9503e-08	-6.1175e-08	-6.3181e-08	-6.3793e-08	-6.6802e-08	-6.7805e-08	-6.6189e-08	-6.7526e-08	-7.1761e-08	-7.3042e-08	-7.3599e-08	-7.5159e-08	-7.6552e-08	-7.9394e-08	-8.0508e-08	-8.1009e-08	-8.2235e-08	-7.9895e-08	-8.3461e-08	-8.4464e-08
2.6743e-09	-2.2843e-09	-6.3515e-09	-9.1372e-09	-1.2814e-08	-1.4709e-08	-1.7494e-08	-1.989e-08	-2.2509e-08	-2.4793e-08	-2.5907e-08	-2.6632e-08	-2.379e-08	-4.7358e-09	9.2487e-09	1.2034e-08	4.4572e-09	-1.365e-08	-2.9473e-08	-3.6716e-08	-4.0338e-08	-3.6326e-08	-3.7385e-08	-4.446e-08	-4.797e-08	-4.9586e-08	-4.9475e-08	-5.265e-08	-5.6439e-08	-5.7052e-08	-5.9726e-08	-6.0729e-08	-6.1843e-08	-6.3459e-08	-6.3849e-08	-6.5186e-08	-5.1202e-08	-4.4628e-08	-4.8973e-08	-5.7776e-08	-6.6189e-08	-6.8306e-08	-6.9031e-08	-7.1315e-08	-7.5438e-08	-7.6886e-08	-7.8279e-08	-8.1065e-08	-8.1455e-08	-8.0508e-08
4.4572e-10	-4.4572e-09	-9.0815e-09	-1.3149e-08	-1.6157e-08	-1.8776e-08	-2.1562e-08	-1.989e-08	-2.2843e-08	-2.5295e-08	-2.6409e-08	-2.808e-08	-2.5406e-08	-8.5244e-09	4.0115e-09	8.0229e-09	8.3572e-10	-2.1227e-08	-3.2983e-08	-3.9335e-08	-4.1953e-08	-4.4628e-08	-4.3123e-08	-4.4739e-08	-4.875e-08	-5.343e-08	-5.5046e-08	-5.5882e-08	-5.7943e-08	-5.9838e-08	-6.0618e-08	-6.1286e-08	-6.1286e-08	-6.1286e-08	-6.5688e-08	-6.5911e-08	-5.5603e-08	-5.1202e-08	-5.6439e-08	-6.6189e-08	-6.7916e-08	-6.8473e-08	-7.1426e-08	-7.3934e-08	-7.4936e-08	-7.4045e-08	-7.7555e-08	-7.8335e-08	-7.7444e-08	-7.8614e-08
1.7272e-09	-3.7886e-09	-8.6358e-09	-1.1979e-08	-1.4709e-08	-1.4486e-08	-1.9444e-08	-2.1394e-08	-2.2954e-08	-1.8832e-08	-2.5183e-08	-2.5127e-08	-2.496e-08	-2.301e-08	-1.0084e-08	1.0586e-09	-2.7857e-09	-1.9612e-08	-2.9919e-08	-3.3875e-08	-3.6995e-08	-3.9948e-08	-3.4933e-08	-3.471e-08	-4.524e-08	-4.4015e-08	-4.7135e-08	-4.017e-08	-3.549e-08	-4.1285e-08	-4.9753e-08	-5.1592e-08	-5.1258e-08	-5.3319e-08	-5.6718e-08	-5.9281e-08	-6.0339e-08	-6.2122e-08	-6.3961e-08	-6.5298e-08	-6.6858e-08	-6.9142e-08	-6.9643e-08	-7.1148e-08	-6.9811e-08	-7.3376e-08	-7.4045e-08	-7.5271e-08	-7.3042e-08	-7.4881e-08
1.794e-08	1.5656e-08	1.2982e-08	4.68e-09	-6.2958e-09	-1.131e-08	-1.5154e-08	-1.8442e-08	-1.7996e-08	-2.4849e-08	-2.7523e-08	-2.8749e-08	-2.7467e-08	-2.8303e-08	-3.4153e-08	-2.8972e-08	-2.8247e-08	-3.7942e-08	-4.1452e-08	-4.407e-08	-4.5408e-08	-4.7079e-08	-4.5909e-08	-4.9586e-08	-5.2762e-08	-5.4489e-08	-5.1313e-08	-3.2593e-08	-2.5462e-08	-3.432e-08	-4.6689e-08	-5.6885e-08	-5.8556e-08	-6.3849e-08	-6.4128e-08	-6.7192e-08	-7.1761e-08	-7.2875e-08	-7.3154e-08	-7.5382e-08	-7.6385e-08	-7.4825e-08	-7.8224e-08	-7.8391e-08	-8.2904e-08	-8.2792e-08	-8.2904e-08	-8.5411e-08	-8.7639e-08	-8.8587e-08
5.7776e-08	5.2428e-08	4.7302e-08	3.6772e-08	2.6743e-08	1.9723e-08	1.638e-08	1.3929e-08	1.1032e-08	8.4686e-09	6.4629e-09	4.4572e-09	3.3429e-09	8.1901e-09	3.5657e-09	-2.2286e-09	-4.29e-09	-6.1843e-09	-8.3015e-09	-9.5829e-09	-1.2424e-08	-1.6826e-08	-2.0336e-08	-2.2397e-08	-2.2509e-08	-2.3679e-08	-2.5183e-08	-3.8443e-09	5.0143e-10	-5.3486e-09	-1.4876e-08	-1.9333e-08	-2.2342e-08	-2.7746e-08	-2.9863e-08	-3.2816e-08	-3.6326e-08	-3.783e-08	-3.6716e-08	-4.1229e-08	-4.2733e-08	-3.8722e-08	-3.8833e-08	-4.2678e-08	-4.1285e-08	-4.0505e-08	-4.5686e-08	-4.7636e-08	-4.9475e-08	-5.1592e-08
5.7888e-08	4.914e-08	4.3513e-08	3.9335e-08	3.4376e-08	3.1757e-08	2.8637e-08	2.6409e-08	2.5573e-08	2.1952e-08	2.0224e-08	1.755e-08	1.5767e-08	1.6324e-08	1.2146e-08	1.1199e-08	1.1199e-08	7.4101e-09	6.0729e-09	3.9e-09	2.6186e-09	1.4486e-09	0	9.4715e-10	-2.7857e-09	-1.5043e-09	9.4715e-10	9.8615e-09	-1.5433e-08	-3.3875e-08	-5.4823e-08	-5.6885e-08	-6.0562e-08	-6.5911e-08	-6.8752e-08	-7.0256e-08	-7.3934e-08	-7.5382e-08	-7.7834e-08	-8.0174e-08	-8.1845e-08	-7.8001e-08	-8.1901e-08	-8.5466e-08	-8.7138e-08	-8.1845e-08	-8.2012e-08	-8.4074e-08	-8.4575e-08	-8.5801e-08
3.8666e-08	3.0365e-08	2.0726e-08	1.2313e-08	5.2372e-09	-6.1286e-10	-5.8501e-09	-9.4158e-09	-1.1477e-08	-1.3483e-08	-1.5154e-08	-1.7272e-08	-1.1032e-08	-6.7972e-09	-1.4653e-08	-2.1562e-08	-2.5852e-08	-2.7356e-08	-2.4459e-08	-2.9919e-08	-3.6493e-08	-3.9e-08	-4.1675e-08	-4.3513e-08	-4.5018e-08	-4.6355e-08	-4.3012e-08	-3.2816e-08	-2.4793e-08	-2.3902e-08	-3.9e-08	-4.1006e-08	-4.68e-08	-4.836e-08	-5.1313e-08	-4.7859e-08	-4.8472e-08	-5.3653e-08	-5.7442e-08	-6.1008e-08	-6.3459e-08	-6.6635e-08	-6.8473e-08	-6.9365e-08	-7.0702e-08	-7.0145e-08	-7.1816e-08	-7.3154e-08	-7.4546e-08	-7.1538e-08
3.237e-08	2.7913e-08	2.457e-08	2.3734e-08	1.8664e-08	2.5127e-08	2.0949e-08	1.5934e-08	6.9086e-09	3.8443e-09	1.95e-09	1.3929e-09	1.053e-08	1.2313e-08	3.7886e-09	-5.07e-09	-7.8558e-09	-9.5272e-09	-1.0864e-08	-1.2926e-08	-1.4876e-08	-1.7104e-08	-1.8776e-08	-2.028e-08	-2.184e-08	-2.2174e-08	-2.7245e-08	-2.3512e-08	-2.145e-08	-2.7133e-08	-2.9807e-08	-2.886e-08	-3.1925e-08	-3.4097e-08	-2.9696e-08	-1.3873e-08	-1.5489e-08	-2.7356e-08	-3.6215e-08	-3.9e-08	-4.2065e-08	-4.3959e-08	-4.6912e-08	-4.8026e-08	-4.8528e-08	-5.0088e-08	-5.1592e-08	-5.2762e-08	-5.4155e-08	-5.5771e-08
4.329e-08	3.7886e-08	3.3707e-08	3.354e-08	3.3373e-08	3.12e-08	2.3233e-08	1.95e-08	1.6324e-08	1.443e-08	1.4987e-08	1.7494e-08	1.2369e-08	1.5377e-08	1.2592e-08	5.3486e-09	2.1729e-09	1.17e-09	-3.3429e-10	-2.3957e-09	-4.0115e-09	-5.9058e-09	-7.8001e-09	-9.4158e-09	-1.1533e-08	-1.0753e-08	-1.4932e-08	-1.6269e-08	-1.7494e-08	-1.8386e-08	-2.0057e-08	-2.1784e-08	-2.3177e-08	-2.3679e-08	-1.9389e-08	-6.4629e-09	-6.4629e-09	-1.7439e-08	-2.3344e-08	-2.5462e-08	-2.5685e-08	-2.7969e-08	-3.2482e-08	-3.3206e-08	-3.4599e-08	-3.588e-08	-3.744e-08	-3.8387e-08	-4.0338e-08	-4.212e-08
1.9054e-08	1.2424e-08	3.3986e-09	3.1757e-09	-4.4015e-09	-3.5657e-09	-8.9701e-09	-1.0864e-08	-1.5489e-08	-1.8497e-08	-1.95e-08	-2.0224e-08	-1.9946e-08	-1.7662e-08	-2.4626e-08	-2.4793e-08	-2.9696e-08	-2.9919e-08	-3.042e-08	-3.276e-08	-3.315e-08	-3.3596e-08	-3.3986e-08	-2.34e-08	-1.4486e-08	-1.6046e-08	-2.5796e-08	-3.5045e-08	-3.7273e-08	-3.9279e-08	-4.2845e-08	-4.7302e-08	-4.9753e-08	-5.1592e-08	-4.8918e-08	-5.3319e-08	-5.5882e-08	-5.8278e-08	-5.9058e-08	-6.0339e-08	-6.2233e-08	-6.5465e-08	-6.6412e-08	-6.7805e-08	-6.8919e-08	-7.0479e-08	-7.2095e-08	-7.3042e-08	-7.3822e-08	-7.5104e-08
1.248e-08	7.1315e-09	3.2315e-09	5.8501e-09	-8.3572e-10	-4.5129e-09	-2.2286e-10	-2.5072e-09	-8.4129e-09	6.9643e-09	7.6329e-09	-9.1372e-09	-1.5099e-08	-1.5823e-08	-1.7494e-08	-1.3093e-08	-1.8999e-08	-2.7523e-08	-2.3567e-08	-2.9696e-08	-2.8247e-08	-3.4487e-08	-3.432e-08	-2.184e-08	-1.5656e-08	-1.5823e-08	-2.4069e-08	-3.3429e-08	-3.7385e-08	-3.9557e-08	-3.8109e-08	-3.6605e-08	-4.0672e-08	-4.8026e-08	-5.0589e-08	-5.226e-08	-5.3263e-08	-5.5548e-08	-5.2428e-08	-5.9559e-08	-6.3125e-08	-6.3515e-08	-6.6579e-08	-6.7136e-08	-6.7526e-08	-5.9726e-08	-6.3905e-08	-7.0423e-08	-7.0981e-08	-7.1816e-08
5.0143e-09	-9.4715e-10	-5.0143e-09	-8.8587e-09	-1.1366e-08	-1.3372e-08	-1.7606e-08	-1.9166e-08	-2.1673e-08	-1.4709e-08	-7.2986e-09	-1.3706e-08	-2.0614e-08	-2.4793e-08	-2.6465e-08	-2.9863e-08	-3.237e-08	-3.588e-08	-3.7162e-08	-4.0783e-08	-4.0839e-08	-4.2845e-08	-4.3068e-08	-4.4906e-08	-3.9557e-08	-3.8165e-08	-4.29e-08	-4.8862e-08	-5.0533e-08	-5.2316e-08	-5.1313e-08	-4.2789e-08	-4.1898e-08	-5.1425e-08	-5.6495e-08	-5.4545e-08	-6.1342e-08	-6.3125e-08	-6.5743e-08	-6.6189e-08	-6.7638e-08	-6.9532e-08	-7.1426e-08	-7.1259e-08	-6.9866e-08	-6.6022e-08	-6.7303e-08	-7.2875e-08	-7.7109e-08	-8.0564e-08
4.8472e-09	-8.3572e-10	-4.7358e-09	-3.9557e-09	-1.0084e-08	-1.1199e-08	-1.5656e-08	-1.8274e-08	-2.0224e-08	-2.2119e-08	-2.1116e-08	-1.8999e-08	-2.4292e-08	-2.6632e-08	-2.8359e-08	-3.0365e-08	-3.2259e-08	-3.4042e-08	-3.549e-08	-3.7273e-08	-3.9502e-08	-4.0505e-08	-4.0059e-08	-4.1396e-08	-4.1619e-08	-4.6132e-08	-4.7915e-08	-4.797e-08	-4.5129e-08	-4.8973e-08	-5.2706e-08	-4.8918e-08	-4.5965e-08	-5.0645e-08	-5.4266e-08	-5.499e-08	-5.6272e-08	-5.7219e-08	-6.0061e-08	-6.2178e-08	-6.3571e-08	-6.5186e-08	-6.6579e-08	-6.7916e-08	-6.1899e-08	-6.7192e-08	-7.0312e-08	-7.1649e-08	-7.2151e-08	-7.5772e-08
2.5852e-08	1.794e-08	1.3594e-08	1.5154e-08	1.3093e-08	5.7386e-09	2.9529e-09	-1.3929e-09	-3.3986e-09	-5.6272e-09	-8.3015e-09	-1.1199e-08	-1.3984e-08	-1.131e-08	-1.5544e-08	-1.9556e-08	-2.0614e-08	-2.3344e-08	-2.5072e-08	-2.6799e-08	-2.8916e-08	-3.003e-08	-3.1535e-08	-2.8025e-08	-2.3177e-08	-3.198e-08	-3.4933e-08	-3.7607e-08	-3.9e-08	-3.705e-08	-3.7886e-08	-4.2678e-08	-4.0059e-08	-4.2232e-08	-4.329e-08	-4.3903e-08	-4.9865e-08	-5.1313e-08	-5.2483e-08	-5.0923e-08	-4.9586e-08	-4.3513e-08	-5.1982e-08	-5.2149e-08	-5.3709e-08	-5.5771e-08	-5.6105e-08	-5.6718e-08	-5.9615e-08	-6.0283e-08
2.691e-08	2.3066e-08	2.1896e-08	1.6269e-08	2.145e-08	1.7606e-08	7.7444e-09	3.7329e-09	1.95e-09	-1.2814e-09	-3.5657e-09	-3.3429e-09	-8.7472e-09	-8.1344e-09	-1.0753e-08	-9.8615e-09	-1.5154e-08	-1.7884e-08	-2.0559e-08	-2.1896e-08	-2.3233e-08	-2.4459e-08	-2.5796e-08	-2.7077e-08	-2.496e-08	-2.6297e-08	-3.0197e-08	-3.1702e-08	-3.315e-08	-3.4153e-08	-3.6047e-08	-3.7329e-08	-3.8332e-08	-3.9613e-08	-4.0895e-08	-4.134e-08	-3.3039e-08	-3.3819e-08	-4.0282e-08	-4.3736e-08	-2.8637e-08	-3.3819e-08	-4.6912e-08	-4.8695e-08	-5.1313e-08	-5.304e-08	-5.1648e-08	-5.5269e-08	-5.6161e-08	-5.6606e-08
3.9557e-09	1.6714e-09	-5.9058e-09	-9.9172e-09	-1.3483e-08	-1.5934e-08	-1.8442e-08	-2.223e-08	-2.4626e-08	-2.6966e-08	-2.7913e-08	-2.8303e-08	-3.4432e-08	-3.5657e-08	-3.6103e-08	-3.4209e-08	-3.6215e-08	-4.1062e-08	-4.2733e-08	-4.6578e-08	-4.8082e-08	-5.0143e-08	-5.0868e-08	-5.2818e-08	-5.343e-08	-5.3486e-08	-5.7999e-08	-5.8445e-08	-6.0061e-08	-6.1565e-08	-6.3069e-08	-6.1621e-08	-6.4908e-08	-6.6858e-08	-6.8139e-08	-6.5075e-08	-5.3653e-08	-5.4879e-08	-6.5799e-08	-6.8362e-08	-6.9365e-08	-6.8139e-08	-7.5215e-08	-7.5438e-08	-7.6831e-08	-7.9226e-08	-8.0062e-08	-8.0954e-08	-8.2848e-08	-8.4018e-08
3.2649e-08	2.9585e-08	1.95e-08	1.4542e-08	1.56e-09	-2.7857e-09	-5.4043e-09	-7.2429e-09	-8.3015e-09	-1.2034e-08	-1.4152e-08	-1.7216e-08	-1.9333e-08	-2.1227e-08	-2.2732e-08	-2.2899e-08	-2.3233e-08	-2.7467e-08	-2.8415e-08	-3.1033e-08	-3.2426e-08	-3.432e-08	-3.588e-08	-3.7496e-08	-3.939e-08	-4.095e-08	-4.095e-08	-4.3625e-08	-4.5073e-08	-4.6243e-08	-4.7692e-08	-4.6745e-08	-4.9475e-08	-4.8862e-08	-5.2483e-08	-4.9698e-08	-3.8165e-08	-4.0728e-08	-5.0979e-08	-5.2372e-08	-5.4879e-08	-5.8668e-08	-6.0172e-08	-6.1509e-08	-6.2512e-08	-6.2178e-08	-6.5465e-08	-6.7192e-08	-6.8752e-08	-6.9643e-08
5.226e-08	4.6633e-08	4.1062e-08	3.3373e-08	2.4403e-08	1.794e-08	1.8497e-08	1.2592e-08	8.0229e-09	4.9029e-09	2.3957e-09	-1.6714e-10	-4.0115e-09	-5.8501e-09	-9.1929e-09	-9.9172e-09	-1.2592e-08	-1.4152e-08	-1.482e-08	-1.8274e-08	-2.0726e-08	-2.2509e-08	-2.379e-08	-2.5072e-08	-2.7969e-08	-2.964e-08	-3.1367e-08	-3.2482e-08	-3.2537e-08	-3.5156e-08	-3.6326e-08	-3.8555e-08	-3.8722e-08	-3.8499e-08	-3.3763e-08	-3.4097e-08	-2.8693e-08	-2.9473e-08	-3.7273e-08	-4.0672e-08	-3.9613e-08	-3.978e-08	-4.2455e-08	-4.0839e-08	-4.4906e-08	-4.9809e-08	-5.1536e-08	-5.304e-08	-5.421e-08	-5.6216e-08
3.1089e-08	3.0532e-08	2.691e-08	1.9612e-08	1.0642e-08	5.5715e-11	-7.1315e-09	-1.5712e-08	-1.9946e-08	-2.3734e-08	-2.6019e-08	-3.159e-08	-3.1033e-08	-3.4432e-08	-3.9e-08	-4.095e-08	-4.1675e-08	-4.5296e-08	-4.8026e-08	-5.031e-08	-5.148e-08	-5.3765e-08	-5.5826e-08	-5.5993e-08	-6.0339e-08	-6.1955e-08	-6.1843e-08	-6.3961e-08	-6.6078e-08	-6.7582e-08	-6.3571e-08	-6.4796e-08	-6.9421e-08	-7.1148e-08	-6.9643e-08	-7.3154e-08	-7.2819e-08	-7.2206e-08	-7.6441e-08	-7.7109e-08	-7.9672e-08	-7.1984e-08	-6.3013e-08	-5.8222e-08	-6.3459e-08	-7.2429e-08	-7.5995e-08	-7.7499e-08	-7.7945e-08	-8.0452e-08
4.0839e-08	4.5073e-08	5.2873e-08	4.8305e-08	4.251e-08	3.5936e-08	1.833e-08	8.4686e-09	1.17e-09	-2.3957e-09	-5.6272e-09	-4.7915e-09	-3.9557e-09	-1.1477e-08	-1.5879e-08	-1.755e-08	-1.9556e-08	-2.0392e-08	-2.0949e-08	-9.4715e-10	1.4709e-08	1.2146e-08	6.3515e-09	-5.2372e-09	-2.1227e-08	-2.7189e-08	-3.081e-08	-3.0532e-08	-2.8693e-08	-3.6939e-08	-3.7329e-08	-3.9613e-08	-4.2065e-08	-4.5519e-08	-4.68e-08	-4.8305e-08	-4.9976e-08	-5.07e-08	-5.187e-08	-5.3152e-08	-5.4155e-08	-4.5742e-08	-2.6186e-08	-1.8776e-08	-2.6576e-08	-4.7302e-08	-5.3988e-08	-5.6551e-08	-5.8166e-08	-5.8779e-08
7.7054e-08	7.4602e-08	7.4045e-08	6.9476e-08	6.3682e-08	5.5325e-08	4.4962e-08	3.8276e-08	3.4766e-08	3.315e-08	2.9083e-08	2.4793e-08	2.0113e-08	1.8999e-08	2.34e-08	2.0949e-08	1.8832e-08	1.794e-08	3.5936e-08	6.5465e-08	7.1816e-08	6.1676e-08	4.3346e-08	2.2397e-08	1.0753e-08	7.9115e-09	2.34e-09	3.2315e-09	-3.3429e-10	-7.5772e-09	-2.6186e-09	-1.1422e-08	-1.4764e-08	-1.5767e-08	-1.8052e-08	-1.9389e-08	-2.0559e-08	-2.0503e-08	-1.5879e-08	-2.1227e-08	-2.2732e-08	-1.8999e-08	1.7272e-09	1.1366e-08	6.4072e-09	-1.1867e-08	-2.0336e-08	-2.145e-08	-2.73e-08	-2.9473e-08
1.7829e-09	-4.0672e-09	-9.8058e-09	-1.482e-08	-1.8553e-08	-2.106e-08	-2.4292e-08	-2.6465e-08	-2.9529e-08	-3.2537e-08	-3.2649e-08	-3.627e-08	-4.017e-08	-4.2176e-08	-4.3792e-08	-4.3903e-08	-4.5463e-08	-4.7023e-08	-1.4207e-08	3.0086e-09	-9.0258e-09	-6.2401e-09	-3.4376e-08	-3.783e-08	-3.8387e-08	-4.8305e-08	-4.9976e-08	-4.8695e-08	-5.7052e-08	-6.2679e-08	-6.2958e-08	-6.8641e-08	-7.0145e-08	-7.0702e-08	-7.4045e-08	-7.4992e-08	-7.4379e-08	-7.8669e-08	-7.9561e-08	-8.0006e-08	-7.8391e-08	-7.9282e-08	-6.8139e-08	-5.7498e-08	-5.7665e-08	-6.9031e-08	-7.4825e-08	-8.1288e-08	-8.4798e-08	-8.7417e-08
4.7469e-08	4.2288e-08	4.173e-08	3.588e-08	3.354e-08	3.0142e-08	2.6632e-08	2.3957e-08	2.1784e-08	2.0614e-08	1.8943e-08	1.6436e-08	1.4486e-08	1.2647e-08	1.5266e-08	1.0084e-08	7.1315e-09	1.0809e-08	3.276e-08	5.8723e-08	6.9643e-08	5.4545e-08	3.3596e-08	1.6659e-08	6.8529e-09	2.2286e-10	-4.3458e-09	-2.6743e-09	-5.0143e-10	-6.0729e-09	-1.0029e-08	-1.1979e-08	-1.3037e-08	-1.3594e-08	-1.404e-08	-1.1087e-08	-1.5823e-08	-2.0113e-08	-2.1172e-08	-2.2787e-08	-2.3512e-08	-2.418e-08	-2.262e-08	-1.7996e-08	-1.6046e-08	-2.2174e-08	-2.6576e-08	-2.9473e-08	-3.0365e-08	-3.198e-08
-1.8943e-09	-9.7501e-09	-1.4374e-08	-1.7884e-08	-2.067e-08	-2.3623e-08	-2.6242e-08	-2.6075e-08	-2.7969e-08	-3.1033e-08	-2.6297e-08	-2.4459e-08	-2.7412e-08	-2.9529e-08	-3.1256e-08	-3.822e-08	-4.3959e-08	-4.407e-08	-3.4432e-08	-6.7415e-09	6.6858e-09	-1.7662e-08	-2.8749e-08	-4.2399e-08	-4.0783e-08	-5.0199e-08	-5.3486e-08	-5.0812e-08	-4.6188e-08	-5.5548e-08	-5.3263e-08	-5.9503e-08	-6.2791e-08	-6.7749e-08	-6.9142e-08	-6.5743e-08	-6.4016e-08	-7.2541e-08	-7.5939e-08	-7.9226e-08	-7.9672e-08	-8.0842e-08	-8.3182e-08	-8.6414e-08	-8.6525e-08	-8.8642e-08	-8.9032e-08	-9.0592e-08	-9.2264e-08	-9.3601e-08
-1.5043e-09	-9.6944e-09	-1.3929e-08	-1.6937e-08	-2.028e-08	-2.1784e-08	-2.4459e-08	-2.6687e-08	-2.5072e-08	-1.833e-08	-1.3372e-08	-1.6547e-08	-1.95e-08	-2.7356e-08	-3.3986e-08	-3.4209e-08	-4.0505e-08	-4.3569e-08	-4.4683e-08	-4.2455e-08	-2.9417e-08	-2.808e-08	-3.822e-08	-4.7859e-08	-5.0868e-08	-5.3208e-08	-5.2428e-08	-5.226e-08	-5.2706e-08	-5.9615e-08	-6.0228e-08	-6.2122e-08	-6.5576e-08	-5.4768e-08	-6.1342e-08	-6.9309e-08	-6.7248e-08	-6.6245e-08	-7.2318e-08	-7.8446e-08	-8.0174e-08	-8.0786e-08	-8.2904e-08	-8.3739e-08	-8.5689e-08	-8.7918e-08	-8.7918e-08	-8.9032e-08	-9.0369e-08	-8.9255e-08
-1.4987e-08	-1.8274e-08	-2.5963e-08	-2.8582e-08	-3.1479e-08	-3.588e-08	-3.1869e-08	-3.315e-08	-4.2288e-08	-3.8499e-08	-4.0505e-08	-3.4209e-08	-2.9752e-08	-3.8443e-08	-4.7079e-08	-4.836e-08	-5.2873e-08	-5.5771e-08	-5.8278e-08	-6.2289e-08	-6.4518e-08	-6.6858e-08	-7.1092e-08	-7.1426e-08	-7.2039e-08	-7.3154e-08	-7.5271e-08	-7.7165e-08	-7.9449e-08	-7.8446e-08	-7.7276e-08	-8.2458e-08	-8.2068e-08	-8.2904e-08	-8.0564e-08	-8.3126e-08	-8.8085e-08	-8.9589e-08	-9.0592e-08	-9.1261e-08	-9.3991e-08	-9.1985e-08	-9.2765e-08	-9.3712e-08	-9.1372e-08	-9.2152e-08	-9.7612e-08	-9.9897e-08	-1.0229e-07	-1.0279e-07
-2.106e-08	-2.7022e-08	-3.1033e-08	-3.4599e-08	-3.822e-08	-4.095e-08	-4.4238e-08	-4.6912e-08	-4.7023e-08	-4.485e-08	-4.9475e-08	-5.4823e-08	-5.6829e-08	-5.9002e-08	-6.0562e-08	-6.3236e-08	-6.4239e-08	-6.5688e-08	-6.7972e-08	-6.9086e-08	-6.8139e-08	-6.4963e-08	-7.1203e-08	-7.2485e-08	-7.2875e-08	-7.3265e-08	-7.4881e-08	-7.4379e-08	-7.0981e-08	-7.3544e-08	-7.0813e-08	-6.8473e-08	-7.5494e-08	-7.9616e-08	-8.2402e-08	-8.4296e-08	-8.4909e-08	-8.5244e-08	-8.9979e-08	-8.8809e-08	-9.1539e-08	-9.5217e-08	-9.7055e-08	-9.8225e-08	-9.8615e-08	-9.8782e-08	-1.0023e-07	-9.7668e-08	-9.8058e-08	-1.0291e-07
-2.691e-08	-3.2426e-08	-3.6549e-08	-3.8722e-08	-4.3346e-08	-4.6466e-08	-4.8862e-08	-5.1202e-08	-5.3542e-08	-5.5938e-08	-5.6718e-08	-5.9392e-08	-6.1676e-08	-6.4128e-08	-6.5298e-08	-6.7916e-08	-6.7192e-08	-6.7526e-08	-7.1148e-08	-7.2541e-08	-7.4546e-08	-7.6218e-08	-7.7555e-08	-7.8948e-08	-8.0118e-08	-8.1511e-08	-8.4408e-08	-8.4631e-08	-8.3294e-08	-8.2235e-08	-6.9755e-08	-6.6468e-08	-7.4881e-08	-8.0062e-08	-8.2346e-08	-8.9032e-08	-9.0425e-08	-9.2264e-08	-9.3378e-08	-9.3935e-08	-9.5105e-08	-9.8671e-08	-9.9339e-08	-1.0096e-07	-1.0196e-07	-1.0324e-07	-1.0497e-07	-1.0653e-07	-1.063e-07	-1.0792e-07
-2.5907e-08	-3.1423e-08	-3.5267e-08	-3.8945e-08	-4.3235e-08	-4.5185e-08	-4.7413e-08	-4.9976e-08	-5.1313e-08	-5.4266e-08	-5.6996e-08	-5.8723e-08	-6.0841e-08	-6.2679e-08	-6.2902e-08	-6.3849e-08	-6.2011e-08	-5.6439e-08	-6.3682e-08	-6.8195e-08	-7.0368e-08	-7.1761e-08	-7.3822e-08	-7.5995e-08	-7.6942e-08	-7.7221e-08	-7.3321e-08	-7.3376e-08	-8.0675e-08	-8.5021e-08	-7.9226e-08	-7.5159e-08	-7.7722e-08	-8.0675e-08	-8.6859e-08	-8.3906e-08	-9.0871e-08	-9.1651e-08	-9.2877e-08	-9.4604e-08	-9.6387e-08	-9.8949e-08	-9.9785e-08	-1.0084e-07	-1.0012e-07	-1.0341e-07	-1.0452e-07	-1.0625e-07	-1.0324e-07	-1.0408e-07
-2.7077e-08	-3.2259e-08	-3.5323e-08	-3.8777e-08	-4.2956e-08	-4.4293e-08	-4.5408e-08	-4.6188e-08	-4.0616e-08	-3.9446e-08	-4.2455e-08	-4.8806e-08	-5.1313e-08	-5.0533e-08	-5.7553e-08	-5.9503e-08	-5.3486e-08	-5.4266e-08	-6.3125e-08	-6.7136e-08	-6.9421e-08	-7.1092e-08	-7.2652e-08	-7.0869e-08	-7.4714e-08	-6.3125e-08	-5.7553e-08	-5.6885e-08	-6.6133e-08	-7.6441e-08	-8.4575e-08	-8.8921e-08	-8.9924e-08	-9.3155e-08	-9.3712e-08	-9.4102e-08	-9.5885e-08	-9.7389e-08	-9.8448e-08	-9.6777e-08	-9.4882e-08	-9.0425e-08	-9.5941e-08	-9.6554e-08	-9.6498e-08	-1.0396e-07	-1.0497e-07	-1.0614e-07	-1.0853e-07	-1.0876e-07
-2.1673e-08	-2.2397e-08	-3.0977e-08	-3.5825e-08	-3.3485e-08	-2.2843e-08	-3.1367e-08	-3.0699e-08	-2.3233e-08	-2.5072e-08	-3.4153e-08	-4.5408e-08	-5.0923e-08	-5.4823e-08	-5.7498e-08	-6.1621e-08	-6.0673e-08	-6.3403e-08	-6.5075e-08	-6.5855e-08	-6.9253e-08	-6.9309e-08	-7.3878e-08	-7.4435e-08	-5.0756e-08	-3.471e-08	-4.8528e-08	-4.797e-08	-7.5215e-08	-8.4074e-08	-8.9199e-08	-9.5049e-08	-9.5607e-08	-9.8559e-08	-9.6052e-08	-1.0029e-07	-1.0179e-07	-1.0352e-07	-1.0447e-07	-1.0274e-07	-9.2152e-08	-8.4185e-08	-9.0369e-08	-9.7278e-08	-1.0012e-07	-9.9507e-08	-1.0268e-07	-1.0413e-07	-1.0597e-07	-1.0881e-07
-2.5573e-08	-2.964e-08	-3.2036e-08	-3.5267e-08	-3.3206e-08	-2.7133e-08	-3.4265e-08	-2.9027e-08	-2.5462e-08	-2.7746e-08	-3.6326e-08	-4.5296e-08	-5.1258e-08	-4.2176e-08	-3.8889e-08	-4.7748e-08	-5.343e-08	-5.8445e-08	-6.1286e-08	-5.226e-08	-4.5463e-08	-5.6718e-08	-6.2401e-08	-5.2595e-08	-3.1423e-08	-3.5379e-08	-4.4182e-08	-5.9392e-08	-7.7666e-08	-7.4992e-08	-8.1288e-08	-7.8558e-08	-8.3182e-08	-8.5634e-08	-8.9812e-08	-9.1317e-08	-9.0871e-08	-9.7222e-08	-9.7835e-08	-9.9117e-08	-9.9451e-08	-9.3657e-08	-9.7891e-08	-1.0252e-07	-9.9061e-08	-1.0029e-07	-1.0123e-07	-1.0352e-07	-1.0764e-07	-1.1243e-07
-2.6966e-08	-3.0086e-08	-3.6605e-08	-4.2845e-08	-3.9669e-08	-4.1563e-08	-4.953e-08	-5.1146e-08	-4.3903e-08	-3.7719e-08	-4.29e-08	-5.1592e-08	-4.3736e-08	-2.9975e-08	-2.8303e-08	-3.8276e-08	-5.0868e-08	-4.9698e-08	-5.7052e-08	-6.2623e-08	-5.7888e-08	-5.5436e-08	-6.4351e-08	-5.3263e-08	-2.7245e-08	-3.9669e-08	-3.6605e-08	-3.9335e-08	-6.4462e-08	-8.2736e-08	-7.1761e-08	-7.4045e-08	-8.4742e-08	-8.9589e-08	-9.2932e-08	-9.0982e-08	-9.1595e-08	-9.7779e-08	-9.9451e-08	-1.0079e-07	-1.0246e-07	-1.0213e-07	-1.0669e-07	-1.0736e-07	-9.0425e-08	-9.8504e-08	-1.0385e-07	-1.0864e-07	-1.077e-07	-1.121e-07
-2.1116e-08	-2.4737e-08	-3.1479e-08	-3.6215e-08	-4.407e-08	-4.641e-08	-5.0255e-08	-5.2205e-08	-5.4656e-08	-5.7052e-08	-6.1063e-08	-5.8556e-08	-4.7023e-08	-3.6047e-08	-3.4432e-08	-4.1563e-08	-5.4656e-08	-5.382e-08	-6.0896e-08	-6.7248e-08	-6.1231e-08	-5.343e-08	-6.2401e-08	-5.6383e-08	-2.7802e-08	-3.8722e-08	-3.5936e-08	-3.8499e-08	-4.6466e-08	-7.2819e-08	-7.4658e-08	-7.3376e-08	-8.5634e-08	-8.0954e-08	-8.6191e-08	-8.9255e-08	-9.4437e-08	-9.5885e-08	-9.6442e-08	-1.0107e-07	-1.0313e-07	-1.0502e-07	-1.0675e-07	-1.0825e-07	-1.0887e-07	-1.1098e-07	-1.1366e-07	-1.1488e-07	-1.1522e-07	-1.1683e-07
-2.925e-08	-3.0253e-08	-3.7106e-08	-4.1006e-08	-4.8249e-08	-5.2873e-08	-5.4823e-08	-5.6049e-08	-5.8891e-08	-5.9893e-08	-6.1063e-08	-6.2122e-08	-6.2568e-08	-5.4823e-08	-5.1703e-08	-5.7108e-08	-6.2178e-08	-6.5131e-08	-6.2011e-08	-6.9811e-08	-6.0172e-08	-5.1369e-08	-6.1119e-08	-5.7442e-08	-2.9362e-08	-4.2009e-08	-3.6883e-08	-3.8889e-08	-4.4628e-08	-5.7776e-08	-7.5549e-08	-8.1176e-08	-7.4769e-08	-7.9616e-08	-8.3238e-08	-8.7584e-08	-8.6358e-08	-9.1205e-08	-9.8058e-08	-1.0112e-07	-1.0463e-07	-1.0708e-07	-1.0747e-07	-1.0909e-07	-1.1338e-07	-1.1566e-07	-1.1789e-07	-1.1137e-07	-1.0597e-07	-1.1149e-07
-3.3095e-08	-3.8945e-08	-4.2622e-08	-4.6633e-08	-4.9475e-08	-5.1592e-08	-4.7692e-08	-5.3932e-08	-5.4099e-08	-5.8946e-08	-6.2679e-08	-6.4741e-08	-6.5911e-08	-6.8696e-08	-7.0089e-08	-7.0981e-08	-6.9031e-08	-7.4658e-08	-7.4156e-08	-7.3655e-08	-6.8919e-08	-7.1816e-08	-6.7248e-08	-6.3738e-08	-2.769e-08	-1.131e-08	-3.1925e-08	-3.2315e-08	-4.9363e-08	-5.7219e-08	-6.5799e-08	-8.0675e-08	-7.6441e-08	-8.0285e-08	-8.4464e-08	-8.6692e-08	-8.8085e-08	-9.3044e-08	-9.5662e-08	-9.8114e-08	-1.0006e-07	-9.8169e-08	-1.0112e-07	-1.0369e-07	-1.0369e-07	-1.0207e-07	-1.0224e-07	-8.6302e-08	-7.9951e-08	-9.2041e-08
-2.3512e-08	-2.8359e-08	-3.159e-08	-3.7385e-08	-4.0895e-08	-4.212e-08	-4.5742e-08	-4.719e-08	-5.1815e-08	-5.3876e-08	-5.6829e-08	-5.7888e-08	-5.9782e-08	-6.1955e-08	-6.3738e-08	-6.5075e-08	-6.5465e-08	-6.3515e-08	-5.5826e-08	-5.6383e-08	-5.5938e-08	-6.3849e-08	-6.2122e-08	-4.0338e-08	-1.911e-08	-8.6358e-09	-2.6242e-08	-3.7329e-08	-3.9613e-08	-6.3236e-08	-6.9198e-08	-6.8975e-08	-7.5939e-08	-8.0341e-08	-8.1232e-08	-8.1956e-08	-7.7889e-08	-8.7194e-08	-9.0759e-08	-9.1484e-08	-9.1372e-08	-7.9115e-08	-9.0537e-08	-9.4158e-08	-9.7891e-08	-9.7779e-08	-9.4604e-08	-7.4992e-08	-6.7303e-08	-7.4045e-08
-4.5686e-08	-5.1703e-08	-5.2985e-08	-5.8389e-08	-6.1063e-08	-6.3961e-08	-6.7303e-08	-6.9421e-08	-7.1594e-08	-6.9253e-08	-7.0089e-08	-7.1649e-08	-7.5995e-08	-7.7165e-08	-6.8306e-08	-7.2931e-08	-7.6998e-08	-5.3319e-08	-4.251e-08	-5.1648e-08	-6.7582e-08	-7.8391e-08	-6.8919e-08	-4.9085e-08	-4.1508e-08	-3.4655e-08	-3.3429e-08	-5.8556e-08	-6.6691e-08	-8.5244e-08	-8.5411e-08	-9.1651e-08	-9.6609e-08	-9.6498e-08	-1.0447e-07	-1.0441e-07	-1.1009e-07	-1.1143e-07	-1.1282e-07	-1.1321e-07	-1.1505e-07	-1.1683e-07	-1.1956e-07	-1.1906e-07	-1.1761e-07	-1.1923e-07	-1.1706e-07	-9.9729e-08	-9.3155e-08	-9.4882e-08
-4.2566e-08	-5.0199e-08	-5.421e-08	-5.7108e-08	-5.9949e-08	-6.1063e-08	-6.4295e-08	-6.8195e-08	-6.9866e-08	-7.1649e-08	-7.4268e-08	-7.0758e-08	-7.3711e-08	-7.4045e-08	-7.2819e-08	-7.0758e-08	-5.9949e-08	-4.1173e-08	-3.627e-08	-4.5742e-08	-6.2289e-08	-7.2931e-08	-7.3432e-08	-6.2456e-08	-5.6216e-08	-4.719e-08	-4.2956e-08	-4.7525e-08	-6.0395e-08	-7.6162e-08	-8.5801e-08	-9.2988e-08	-9.7055e-08	-1.0068e-07	-1.0045e-07	-1.0686e-07	-1.0798e-07	-1.0786e-07	-1.121e-07	-1.1282e-07	-1.1433e-07	-1.1366e-07	-1.1622e-07	-1.1583e-07	-1.1761e-07	-1.1895e-07	-1.1288e-07	-1.0725e-07	-1.0993e-07	-1.1405e-07
-5.1313e-08	-5.6495e-08	-5.9503e-08	-6.2456e-08	-6.4741e-08	-6.3849e-08	-6.8083e-08	-6.6356e-08	-5.5046e-08	-4.9196e-08	-5.3152e-08	-5.9503e-08	-6.5131e-08	-7.4546e-08	-7.7165e-08	-7.7666e-08	-7.1928e-08	-6.1008e-08	-5.7052e-08	-6.3236e-08	-7.7666e-08	-8.5689e-08	-8.9478e-08	-9.3879e-08	-1.0213e-07	-9.2654e-08	-7.7444e-08	-7.8224e-08	-8.5856e-08	-9.5885e-08	-1.0474e-07	-1.0926e-07	-1.1221e-07	-1.1488e-07	-1.165e-07	-1.1767e-07	-1.1806e-07	-1.2229e-07	-1.2369e-07	-1.2558e-07	-1.2424e-07	-1.258e-07	-1.287e-07	-1.2915e-07	-1.2943e-07	-1.3154e-07	-1.2976e-07	-1.3054e-07	-1.3138e-07	-1.345e-07
-4.1173e-08	-4.7302e-08	-5.6885e-08	-6.2289e-08	-5.9838e-08	-6.7471e-08	-6.9031e-08	-6.2401e-08	-5.1592e-08	-5.1648e-08	-5.7776e-08	-6.3125e-08	-6.7916e-08	-7.9449e-08	-8.6246e-08	-9.1428e-08	-9.4882e-08	-8.9701e-08	-8.5689e-08	-9.0258e-08	-9.7891e-08	-9.9451e-08	-1.0363e-07	-1.0931e-07	-1.1238e-07	-1.0803e-07	-1.0157e-07	-1.0675e-07	-1.131e-07	-1.1756e-07	-1.2012e-07	-1.2135e-07	-1.2268e-07	-1.2525e-07	-1.2753e-07	-1.2798e-07	-1.2814e-07	-1.3104e-07	-1.3099e-07	-1.3171e-07	-1.3221e-07	-1.3533e-07	-1.3611e-07	-1.3812e-07	-1.3962e-07	-1.4007e-07	-1.4157e-07	-1.4308e-07	-1.4363e-07	-1.4335e-07
4.4405e-08	3.6382e-08	3.003e-08	2.6799e-08	2.3957e-08	1.8943e-08	2.1506e-08	2.2063e-08	2.262e-08	2.1172e-08	1.1589e-08	5.1815e-09	2.1729e-09	4.4572e-10	-2.1729e-09	-3.6772e-09	-5.7386e-09	-7.0758e-09	-8.8587e-09	-1.0642e-08	-1.248e-08	-1.3093e-08	-1.0084e-08	-8.6358e-09	-8.5244e-09	-1.6547e-08	-2.0002e-08	-2.1617e-08	-2.3233e-08	-2.3957e-08	-2.5072e-08	-2.6799e-08	-2.8359e-08	-3.0253e-08	-3.1089e-08	-3.2315e-08	-3.0476e-08	-1.8163e-08	-2.7022e-08	-2.847e-08	-2.9696e-08	-3.0977e-08	-3.8053e-08	-3.9557e-08	-4.1508e-08	-4.2789e-08	-4.4015e-08	-4.446e-08	-4.641e-08	-4.4293e-08
-5.7386e-08	-6.3069e-08	-6.6133e-08	-7.0535e-08	-7.3655e-08	-7.4881e-08	-7.7054e-08	-8.3015e-08	-8.3572e-08	-8.6636e-08	-8.9422e-08	-8.9645e-08	-9.3044e-08	-9.4771e-08	-9.5105e-08	-9.9339e-08	-1.0068e-07	-1.0218e-07	-1.0313e-07	-1.0363e-07	-1.0435e-07	-9.6164e-08	-9.6721e-08	-9.5718e-08	-8.8029e-08	-1.0045e-07	-1.0681e-07	-1.0981e-07	-1.1193e-07	-1.1388e-07	-1.1611e-07	-1.1689e-07	-1.1873e-07	-1.1934e-07	-1.1945e-07	-1.2163e-07	-1.2519e-07	-1.194e-07	-1.2174e-07	-1.0452e-07	-9.1149e-08	-9.0927e-08	-1.038e-07	-1.1773e-07	-1.2413e-07	-1.2775e-07	-1.3188e-07	-1.3466e-07	-1.3711e-07	-1.3689e-07
-7.6441e-08	-8.1678e-08	-8.6079e-08	-8.8029e-08	-9.3489e-08	-9.7111e-08	-9.9785e-08	-1.0157e-07	-1.0302e-07	-1.0552e-07	-1.0747e-07	-1.0954e-07	-1.1048e-07	-1.0981e-07	-1.0759e-07	-1.1349e-07	-1.1611e-07	-1.1767e-07	-1.1895e-07	-1.165e-07	-1.1667e-07	-1.0898e-07	-1.0848e-07	-1.1633e-07	-1.2274e-07	-1.2497e-07	-1.2664e-07	-1.2742e-07	-1.2246e-07	-1.3099e-07	-1.3349e-07	-1.3349e-07	-1.3544e-07	-1.3188e-07	-1.2452e-07	-1.2229e-07	-1.3572e-07	-1.4051e-07	-1.4168e-07	-1.2519e-07	-1.0831e-07	-1.0764e-07	-1.1672e-07	-1.3338e-07	-1.4096e-07	-1.3845e-07	-1.4085e-07	-1.4898e-07	-1.5249e-07	-1.5294e-07
-7.6552e-08	-8.2569e-08	-8.7082e-08	-9.0592e-08	-9.2988e-08	-9.6108e-08	-9.9117e-08	-1.0146e-07	-1.043e-07	-1.0642e-07	-1.0603e-07	-1.0987e-07	-1.1193e-07	-1.0837e-07	-1.1149e-07	-1.1371e-07	-1.1605e-07	-1.1789e-07	-1.1851e-07	-1.1995e-07	-1.2129e-07	-1.1561e-07	-1.1143e-07	-1.1555e-07	-1.2246e-07	-1.2424e-07	-1.2541e-07	-1.2558e-07	-1.3004e-07	-1.311e-07	-1.3422e-07	-1.3628e-07	-1.3756e-07	-1.3204e-07	-1.1756e-07	-1.116e-07	-1.2213e-07	-1.311e-07	-1.3444e-07	-1.2787e-07	-1.1277e-07	-1.1071e-07	-1.2068e-07	-1.3271e-07	-1.4196e-07	-1.4592e-07	-1.4865e-07	-1.4753e-07	-1.506e-07	-1.5572e-07
-7.5549e-08	-8.2681e-08	-8.6971e-08	-8.8197e-08	-9.2598e-08	-9.5997e-08	-9.8727e-08	-9.7501e-08	-1.0129e-07	-1.0185e-07	-1.0708e-07	-1.087e-07	-1.0664e-07	-1.0892e-07	-1.1444e-07	-1.1383e-07	-1.165e-07	-1.2124e-07	-1.2229e-07	-1.2241e-07	-1.1984e-07	-1.2658e-07	-1.2809e-07	-1.3026e-07	-1.3171e-07	-1.3305e-07	-1.3277e-07	-1.3511e-07	-1.3221e-07	-1.3271e-07	-1.282e-07	-1.2881e-07	-1.3321e-07	-1.3349e-07	-1.2107e-07	-1.1527e-07	-1.18e-07	-1.253e-07	-1.3377e-07	-1.3717e-07	-1.2658e-07	-1.2402e-07	-1.3338e-07	-1.4319e-07	-1.4575e-07	-1.4909e-07	-1.5322e-07	-1.5583e-07	-1.5739e-07	-1.5996e-07
-7.7109e-08	-8.2736e-08	-8.7138e-08	-9.1094e-08	-9.4214e-08	-9.6832e-08	-9.6832e-08	-9.9729e-08	-1.0279e-07	-1.058e-07	-1.0786e-07	-1.1076e-07	-1.1282e-07	-1.1165e-07	-1.1667e-07	-1.1956e-07	-1.2185e-07	-1.2018e-07	-1.1901e-07	-1.2391e-07	-1.2291e-07	-1.2709e-07	-1.3026e-07	-1.3199e-07	-1.3355e-07	-1.3483e-07	-1.3645e-07	-1.3828e-07	-1.3918e-07	-1.3516e-07	-1.35e-07	-1.365e-07	-1.399e-07	-1.4179e-07	-1.306e-07	-1.2096e-07	-1.1784e-07	-1.1633e-07	-1.2553e-07	-1.37e-07	-1.4302e-07	-1.4475e-07	-1.4781e-07	-1.5166e-07	-1.5076e-07	-1.5622e-07	-1.579e-07	-1.5884e-07	-1.6035e-07	-1.6146e-07
-7.8056e-08	-8.2959e-08	-8.4519e-08	-9.0202e-08	-9.2319e-08	-9.0369e-08	-9.1929e-08	-9.8671e-08	-1.0263e-07	-1.0469e-07	-1.0697e-07	-1.0892e-07	-1.087e-07	-1.1098e-07	-1.1488e-07	-1.1327e-07	-1.1321e-07	-1.155e-07	-1.2296e-07	-1.2447e-07	-1.2118e-07	-1.2307e-07	-1.2904e-07	-1.3043e-07	-1.2748e-07	-1.3327e-07	-1.3455e-07	-1.3622e-07	-1.3762e-07	-1.3873e-07	-1.4118e-07	-1.4213e-07	-1.404e-07	-1.4001e-07	-1.282e-07	-1.1344e-07	-1.1488e-07	-1.1695e-07	-1.2742e-07	-1.399e-07	-1.4335e-07	-1.4363e-07	-1.4725e-07	-1.5188e-07	-1.4881e-07	-1.5294e-07	-1.531e-07	-1.4915e-07	-1.472e-07	-1.5238e-07
-8.0174e-08	-8.5411e-08	-8.9589e-08	-9.2877e-08	-9.6331e-08	-9.7835e-08	-9.9952e-08	-1.0391e-07	-1.053e-07	-1.0825e-07	-1.0848e-07	-1.0753e-07	-1.0252e-07	-1.111e-07	-1.1878e-07	-1.2046e-07	-1.2202e-07	-1.2519e-07	-1.2642e-07	-1.2909e-07	-1.3048e-07	-1.3171e-07	-1.3338e-07	-1.3477e-07	-1.3628e-07	-1.3817e-07	-1.3923e-07	-1.4085e-07	-1.4213e-07	-1.4285e-07	-1.4386e-07	-1.438e-07	-1.4413e-07	-1.4581e-07	-1.4413e-07	-1.2697e-07	-1.2987e-07	-1.3656e-07	-1.4191e-07	-1.4452e-07	-1.4686e-07	-1.4781e-07	-1.5004e-07	-1.5249e-07	-1.4854e-07	-1.4402e-07	-1.3149e-07	-1.2263e-07	-1.2536e-07	-1.3555e-07
-8.0954e-08	-8.3405e-08	-8.7417e-08	-9.3657e-08	-9.2988e-08	-9.6554e-08	-1.0062e-07	-1.0068e-07	-1.038e-07	-1.097e-07	-1.116e-07	-1.1098e-07	-1.0837e-07	-1.1059e-07	-1.1695e-07	-1.1934e-07	-1.1923e-07	-1.2452e-07	-1.2592e-07	-1.282e-07	-1.3021e-07	-1.316e-07	-1.3349e-07	-1.3422e-07	-1.365e-07	-1.3711e-07	-1.3856e-07	-1.4068e-07	-1.3996e-07	-1.4185e-07	-1.4274e-07	-1.4425e-07	-1.4308e-07	-1.3962e-07	-1.448e-07	-1.4748e-07	-1.501e-07	-1.5121e-07	-1.5238e-07	-1.5349e-07	-1.5461e-07	-1.5244e-07	-1.4592e-07	-1.5567e-07	-1.5723e-07	-1.4954e-07	-1.2809e-07	-1.1522e-07	-1.1466e-07	-1.2296e-07
-8.1121e-08	-8.5912e-08	-8.8865e-08	-9.3545e-08	-9.5718e-08	-9.9117e-08	-1.0196e-07	-1.0463e-07	-1.072e-07	-1.1015e-07	-1.1249e-07	-1.15e-07	-1.1711e-07	-1.1839e-07	-1.1527e-07	-1.1934e-07	-1.2213e-07	-1.2391e-07	-1.2274e-07	-1.2569e-07	-1.2731e-07	-1.2898e-07	-1.2814e-07	-1.2564e-07	-1.2625e-07	-1.2965e-07	-1.2731e-07	-1.2023e-07	-1.1477e-07	-1.1995e-07	-1.2798e-07	-1.3294e-07	-1.3628e-07	-1.3433e-07	-1.326e-07	-1.3327e-07	-1.3672e-07	-1.4224e-07	-1.4664e-07	-1.4703e-07	-1.4954e-07	-1.5244e-07	-1.5288e-07	-1.5461e-07	-1.5349e-07	-1.5366e-07	-1.3255e-07	-1.1338e-07	-1.1143e-07	-1.2007e-07
-7.6106e-08	-8.0341e-08	-8.1399e-08	-8.3906e-08	-9.1205e-08	-9.8894e-08	-1.0224e-07	-1.0474e-07	-1.0642e-07	-1.0853e-07	-1.1293e-07	-1.1204e-07	-1.15e-07	-1.1834e-07	-1.1906e-07	-1.2034e-07	-1.1934e-07	-1.1956e-07	-1.1728e-07	-1.2419e-07	-1.2558e-07	-1.2447e-07	-1.267e-07	-1.2363e-07	-1.2369e-07	-1.2202e-07	-1.1527e-07	-1.1277e-07	-1.1082e-07	-1.126e-07	-1.2202e-07	-1.2959e-07	-1.3734e-07	-1.4051e-07	-1.3778e-07	-1.3745e-07	-1.4491e-07	-1.4831e-07	-1.521e-07	-1.5439e-07	-1.56e-07	-1.5288e-07	-1.5054e-07	-1.5305e-07	-1.5322e-07	-1.5138e-07	-1.3984e-07	-1.2068e-07	-1.1789e-07	-1.2675e-07
-8.0619e-08	-8.8029e-08	-9.1539e-08	-9.3155e-08	-9.8838e-08	-1.0179e-07	-1.0118e-07	-1.0692e-07	-1.0903e-07	-1.1132e-07	-1.1383e-07	-1.1589e-07	-1.1862e-07	-1.2029e-07	-1.2224e-07	-1.2263e-07	-1.2452e-07	-1.2597e-07	-1.2575e-07	-1.2725e-07	-1.3048e-07	-1.2998e-07	-1.3149e-07	-1.297e-07	-1.3282e-07	-1.3087e-07	-1.2163e-07	-1.2101e-07	-1.1656e-07	-1.121e-07	-1.1973e-07	-1.3149e-07	-1.3661e-07	-1.4007e-07	-1.3867e-07	-1.4581e-07	-1.4686e-07	-1.4425e-07	-1.4976e-07	-1.4881e-07	-1.4842e-07	-1.4124e-07	-1.4196e-07	-1.4948e-07	-1.5177e-07	-1.5361e-07	-1.501e-07	-1.3266e-07	-1.3026e-07	-1.3684e-07
-7.5438e-08	-8.1288e-08	-8.6246e-08	-8.9868e-08	-9.5439e-08	-9.9005e-08	-1.0185e-07	-1.0424e-07	-1.0681e-07	-1.0837e-07	-1.0993e-07	-1.053e-07	-1.1137e-07	-1.1527e-07	-1.1572e-07	-1.1516e-07	-1.1895e-07	-1.214e-07	-1.2263e-07	-1.2436e-07	-1.2809e-07	-1.3043e-07	-1.3232e-07	-1.3232e-07	-1.2653e-07	-1.3405e-07	-1.3544e-07	-1.3567e-07	-1.2564e-07	-1.2179e-07	-1.219e-07	-1.3271e-07	-1.3689e-07	-1.404e-07	-1.4363e-07	-1.4659e-07	-1.4792e-07	-1.4263e-07	-1.4469e-07	-1.5177e-07	-1.4887e-07	-1.5043e-07	-1.5366e-07	-1.5745e-07	-1.5801e-07	-1.599e-07	-1.5795e-07	-1.4809e-07	-1.5199e-07	-1.5706e-07
-8.2068e-08	-8.6971e-08	-9.1651e-08	-9.1818e-08	-9.7389e-08	-1.014e-07	-1.0424e-07	-1.0614e-07	-1.0731e-07	-1.1137e-07	-1.1461e-07	-1.1633e-07	-1.1605e-07	-1.1979e-07	-1.2157e-07	-1.2463e-07	-1.2619e-07	-1.243e-07	-1.2079e-07	-1.2497e-07	-1.3087e-07	-1.3221e-07	-1.2915e-07	-1.3216e-07	-1.355e-07	-1.3561e-07	-1.2675e-07	-1.2558e-07	-1.2937e-07	-1.3489e-07	-1.3996e-07	-1.4218e-07	-1.438e-07	-1.453e-07	-1.4391e-07	-1.4642e-07	-1.4698e-07	-1.4291e-07	-1.5182e-07	-1.5338e-07	-1.5455e-07	-1.5589e-07	-1.501e-07	-1.4731e-07	-1.5583e-07	-1.5868e-07	-1.6096e-07	-1.6319e-07	-1.628e-07	-1.5856e-07
-7.4546e-08	-7.9839e-08	-8.8531e-08	-9.2375e-08	-9.7167e-08	-9.9618e-08	-1.0324e-07	-1.0419e-07	-1.0837e-07	-1.0703e-07	-1.0636e-07	-1.1048e-07	-1.1249e-07	-1.1466e-07	-1.1962e-07	-1.2202e-07	-1.238e-07	-1.2296e-07	-1.2458e-07	-1.2647e-07	-1.2664e-07	-1.3255e-07	-1.321e-07	-1.3344e-07	-1.277e-07	-1.0608e-07	-9.7557e-08	-9.9284e-08	-1.0391e-07	-1.1472e-07	-1.287e-07	-1.3533e-07	-1.3828e-07	-1.3918e-07	-1.4436e-07	-1.4681e-07	-1.4686e-07	-1.4854e-07	-1.5238e-07	-1.5349e-07	-1.5478e-07	-1.5595e-07	-1.5712e-07	-1.5583e-07	-1.5606e-07	-1.5065e-07	-1.5216e-07	-1.5829e-07	-1.6007e-07	-1.6174e-07
-8.2514e-08	-8.8029e-08	-9.0927e-08	-9.5161e-08	-9.8169e-08	-9.6999e-08	-1.0352e-07	-1.0213e-07	-1.0291e-07	-1.0775e-07	-1.0575e-07	-1.0954e-07	-1.1533e-07	-1.1383e-07	-1.189e-07	-1.2202e-07	-1.2346e-07	-1.2508e-07	-1.2658e-07	-1.2753e-07	-1.2826e-07	-1.2775e-07	-1.2246e-07	-1.2553e-07	-1.1377e-07	-9.8058e-08	-9.3712e-08	-9.6554e-08	-1.0302e-07	-1.1438e-07	-1.2647e-07	-1.3199e-07	-1.384e-07	-1.4213e-07	-1.4285e-07	-1.4597e-07	-1.4803e-07	-1.5071e-07	-1.5205e-07	-1.5294e-07	-1.5427e-07	-1.5544e-07	-1.5778e-07	-1.589e-07	-1.5918e-07	-1.4898e-07	-1.5076e-07	-1.5706e-07	-1.5973e-07	-1.5996e-07
-8.3516e-08	-9.0035e-08	-9.4715e-08	-9.7557e-08	-9.9228e-08	-1.0274e-07	-1.0614e-07	-1.0586e-07	-1.1093e-07	-1.1221e-07	-1.1065e-07	-1.1405e-07	-1.1823e-07	-1.2046e-07	-1.2224e-07	-1.2419e-07	-1.2519e-07	-1.2681e-07	-1.2876e-07	-1.2681e-07	-1.2982e-07	-1.2881e-07	-1.3037e-07	-1.3321e-07	-1.2291e-07	-1.0458e-07	-9.9729e-08	-1.038e-07	-1.1349e-07	-1.2391e-07	-1.3232e-07	-1.3812e-07	-1.4157e-07	-1.4508e-07	-1.4854e-07	-1.4965e-07	-1.5032e-07	-1.5349e-07	-1.516e-07	-1.5227e-07	-1.5617e-07	-1.5823e-07	-1.5873e-07	-1.589e-07	-1.6118e-07	-1.6302e-07	-1.6469e-07	-1.6547e-07	-1.6642e-07	-1.6319e-07
-8.8085e-08	-9.3824e-08	-9.8559e-08	-1.0146e-07	-1.053e-07	-1.0831e-07	-1.1121e-07	-1.131e-07	-1.1622e-07	-1.1845e-07	-1.2034e-07	-1.2263e-07	-1.2419e-07	-1.2202e-07	-1.2486e-07	-1.2619e-07	-1.2681e-07	-1.2987e-07	-1.2553e-07	-1.2285e-07	-1.2174e-07	-1.2525e-07	-1.2497e-07	-1.2781e-07	-1.277e-07	-1.2023e-07	-1.1745e-07	-1.2346e-07	-1.321e-07	-1.3606e-07	-1.3344e-07	-1.3511e-07	-1.3951e-07	-1.4363e-07	-1.4659e-07	-1.4753e-07	-1.4842e-07	-1.5405e-07	-1.5238e-07	-1.5511e-07	-1.5912e-07	-1.5801e-07	-1.6118e-07	-1.6235e-07	-1.633e-07	-1.6497e-07	-1.6742e-07	-1.6826e-07	-1.6742e-07	-1.6909e-07
-8.7361e-08	-9.2319e-08	-9.6387e-08	-9.9117e-08	-1.0391e-07	-1.0669e-07	-1.1048e-07	-1.1288e-07	-1.1511e-07	-1.1761e-07	-1.1789e-07	-1.1806e-07	-1.2001e-07	-1.2268e-07	-1.2458e-07	-1.2586e-07	-1.2569e-07	-1.3043e-07	-1.3126e-07	-1.3193e-07	-1.3372e-07	-1.3539e-07	-1.3672e-07	-1.394e-07	-1.4129e-07	-1.4341e-07	-1.443e-07	-1.4436e-07	-1.4815e-07	-1.477e-07	-1.4213e-07	-1.4313e-07	-1.482e-07	-1.511e-07	-1.4764e-07	-1.516e-07	-1.5505e-07	-1.5734e-07	-1.5901e-07	-1.6141e-07	-1.6246e-07	-1.6386e-07	-1.6508e-07	-1.6631e-07	-1.6609e-07	-1.662e-07	-1.6792e-07	-1.6932e-07	-1.7071e-07	-1.7166e-07
-8.4742e-08	-8.8809e-08	-8.9757e-08	-9.5551e-08	-9.4715e-08	-9.5217e-08	-9.7389e-08	-1.0714e-07	-1.1026e-07	-1.121e-07	-1.0452e-07	-9.5384e-08	-9.2598e-08	-9.5328e-08	-1.0224e-07	-1.0809e-07	-1.1422e-07	-1.2179e-07	-1.2692e-07	-1.3204e-07	-1.3511e-07	-1.3572e-07	-1.3912e-07	-1.4107e-07	-1.4441e-07	-1.4542e-07	-1.4731e-07	-1.4998e-07	-1.5132e-07	-1.526e-07	-1.5411e-07	-1.555e-07	-1.5751e-07	-1.5873e-07	-1.5985e-07	-1.6129e-07	-1.6269e-07	-1.6363e-07	-1.6492e-07	-1.6659e-07	-1.6714e-07	-1.6831e-07	-1.6447e-07	-1.6486e-07	-1.6709e-07	-1.6976e-07	-1.6815e-07	-1.7093e-07	-1.726e-07	-1.6965e-07
2.2208e-07	2.1729e-07	2.1684e-07	2.1534e-07	2.1511e-07	2.0782e-07	1.9918e-07	1.911e-07	1.8503e-07	1.8408e-07	2.0542e-07	2.1829e-07	2.208e-07	2.1801e-07	2.1266e-07	2.0575e-07	1.9885e-07	1.9233e-07	1.8118e-07	1.7249e-07	1.6915e-07	1.609e-07	1.5645e-07	1.5455e-07	1.5205e-07	1.506e-07	1.4904e-07	1.4982e-07	1.4776e-07	1.4525e-07	1.4324e-07	1.423e-07	1.4347e-07	1.4937e-07	1.4826e-07	1.4547e-07	1.4179e-07	1.4012e-07	1.3879e-07	1.4046e-07	1.4135e-07	1.3845e-07	1.4263e-07	1.3923e-07	1.3411e-07	1.3522e-07	1.36e-07	1.311e-07	1.3611e-07	1.345e-07
-6.2289e-08	-6.7805e-08	-7.2262e-08	-7.0089e-08	-6.8975e-08	-7.4435e-08	-7.9505e-08	-7.5995e-08	-7.8502e-08	-8.4798e-08	-7.5884e-08	-6.3069e-08	-5.8556e-08	-7.1872e-08	-8.2124e-08	-8.7138e-08	-9.9897e-08	-8.3684e-08	-9.4158e-08	-1.0001e-07	-1.0413e-07	-1.0681e-07	-1.1221e-07	-1.1466e-07	-1.1082e-07	-8.6748e-08	-8.3405e-08	-1.126e-07	-1.0285e-07	-1.0931e-07	-1.1199e-07	-1.1533e-07	-1.0658e-07	-1.058e-07	-1.1711e-07	-1.2809e-07	-1.2837e-07	-1.336e-07	-1.3645e-07	-1.3622e-07	-1.3945e-07	-1.4335e-07	-1.4352e-07	-1.443e-07	-1.4748e-07	-1.4898e-07	-1.4987e-07	-1.5088e-07	-1.5205e-07	-1.5372e-07
3.6632e-07	3.5914e-07	3.5524e-07	3.5156e-07	3.4994e-07	3.4822e-07	3.5e-07	3.4844e-07	3.4538e-07	3.4136e-07	3.4125e-07	3.4811e-07	3.5117e-07	3.5295e-07	3.5412e-07	3.4777e-07	3.3902e-07	3.3195e-07	3.2944e-07	3.2693e-07	3.3395e-07	3.3875e-07	3.3735e-07	3.5089e-07	3.6749e-07	3.4783e-07	3.5267e-07	3.5134e-07	3.4337e-07	3.3379e-07	3.4253e-07	3.4476e-07	3.4086e-07	3.4766e-07	3.4571e-07	3.1652e-07	3.1412e-07	3.1462e-07	3.0716e-07	3.0989e-07	2.9306e-07	2.852e-07	2.7618e-07	2.7557e-07	2.6871e-07	2.5991e-07	2.5763e-07	2.5629e-07	2.5439e-07	2.5356e-07
-5.538e-08	-6.2401e-08	-6.8919e-08	-6.9866e-08	-6.8696e-08	-7.2708e-08	-8.2346e-08	-8.6358e-08	-9.1372e-08	-9.5941e-08	-9.8782e-08	-1.0129e-07	-1.0413e-07	-1.0525e-07	-1.0369e-07	-1.0809e-07	-1.0458e-07	-1.0424e-07	-1.077e-07	-1.0575e-07	-9.8949e-08	-9.6999e-08	-9.6999e-08	-7.5605e-08	-7.6775e-08	-8.3795e-08	-8.2625e-08	-8.5801e-08	-9.7445e-08	-1.1249e-07	-1.0296e-07	-9.0035e-08	-1.0062e-07	-1.0564e-07	-1.1901e-07	-1.2865e-07	-1.1695e-07	-1.1862e-07	-1.2742e-07	-1.3355e-07	-1.3678e-07	-1.3789e-07	-1.4035e-07	-1.3845e-07	-1.2859e-07	-1.2547e-07	-1.2954e-07	-1.3817e-07	-1.4358e-07	-1.472e-07
-5.4155e-08	-5.6551e-08	-5.6439e-08	-5.9113e-08	-6.2289e-08	-7.0368e-08	-7.4379e-08	-7.9561e-08	-8.4464e-08	-8.7528e-08	-9.1372e-08	-9.4437e-08	-9.7278e-08	-9.7501e-08	-1.0162e-07	-1.0307e-07	-9.6275e-08	-9.3322e-08	-9.2431e-08	-9.2932e-08	-1.0001e-07	-1.0285e-07	-9.8949e-08	-7.2095e-08	-8.0731e-08	-7.5271e-08	-7.3544e-08	-8.5689e-08	-1.0536e-07	-1.0385e-07	-1.019e-07	-8.7082e-08	-9.3044e-08	-9.6108e-08	-9.9952e-08	-1.0686e-07	-1.1199e-07	-1.1059e-07	-1.1672e-07	-1.1929e-07	-1.2034e-07	-1.2631e-07	-1.2892e-07	-1.1082e-07	-8.8308e-08	-1.0681e-07	-1.1344e-07	-1.2346e-07	-1.2943e-07	-1.3399e-07
-6.0618e-08	-6.2902e-08	-6.4016e-08	-7.0535e-08	-7.5271e-08	-7.6218e-08	-7.8836e-08	-7.5159e-08	-7.4769e-08	-7.9784e-08	-8.3739e-08	-8.4519e-08	-8.1789e-08	-8.8587e-08	-8.9645e-08	-7.8669e-08	-6.3069e-08	-5.7275e-08	-9.0759e-08	-8.8419e-08	-8.7249e-08	-9.2654e-08	-9.6832e-08	-8.0285e-08	-8.4241e-08	-8.4018e-08	-8.0006e-08	-8.5411e-08	-1.0903e-07	-1.0993e-07	-1.0352e-07	-1.0892e-07	-1.0903e-07	-1.1366e-07	-1.189e-07	-1.2157e-07	-1.2291e-07	-1.2491e-07	-1.292e-07	-1.316e-07	-1.3238e-07	-1.3021e-07	-1.2268e-07	-8.9032e-08	-9.8671e-08	-9.2821e-08	-9.2097e-08	-9.7835e-08	-1.2051e-07	-1.355e-07
-5.8111e-08	-6.3069e-08	-6.7081e-08	-7.0925e-08	-7.1872e-08	-7.4936e-08	-7.2875e-08	-6.8529e-08	-6.8919e-08	-7.6162e-08	-7.9226e-08	-8.0564e-08	-7.6775e-08	-8.2068e-08	-8.7305e-08	-7.4324e-08	-5.343e-08	-7.3766e-08	-8.3126e-08	-8.6971e-08	-8.9757e-08	-1.0023e-07	-9.7724e-08	-9.2654e-08	-8.2291e-08	-7.6998e-08	-7.6051e-08	-8.2235e-08	-9.3657e-08	-1.0274e-07	-1.0781e-07	-1.1305e-07	-1.1806e-07	-1.1611e-07	-1.2302e-07	-1.2436e-07	-1.2541e-07	-1.2681e-07	-1.2714e-07	-1.2965e-07	-1.3188e-07	-1.3516e-07	-1.1455e-07	-8.0341e-08	-9.3768e-08	-8.8141e-08	-8.7361e-08	-9.2821e-08	-1.1784e-07	-1.2798e-07
-5.8111e-08	-6.2401e-08	-6.9866e-08	-7.4491e-08	-7.4546e-08	-7.9338e-08	-8.0731e-08	-8.3516e-08	-8.5912e-08	-8.8419e-08	-8.9534e-08	-9.1428e-08	-8.1566e-08	-8.6859e-08	-9.1818e-08	-8.4408e-08	-5.8668e-08	-7.0702e-08	-7.1538e-08	-8.7807e-08	-8.9199e-08	-9.0425e-08	-8.0285e-08	-8.5299e-08	-9.3991e-08	-1.004e-07	-1.0307e-07	-1.0396e-07	-1.1065e-07	-1.1332e-07	-1.1399e-07	-1.1104e-07	-1.1065e-07	-1.0976e-07	-1.1544e-07	-1.2213e-07	-1.2029e-07	-1.228e-07	-1.2915e-07	-1.2475e-07	-1.2229e-07	-1.2469e-07	-1.102e-07	-7.7666e-08	-9.1149e-08	-8.8642e-08	-9.4938e-08	-1.0218e-07	-1.1004e-07	-1.1327e-07
-5.4266e-08	-5.9336e-08	-6.2679e-08	-6.1342e-08	-6.4796e-08	-7.2819e-08	-7.7945e-08	-7.8781e-08	-8.4909e-08	-8.5578e-08	-8.8531e-08	-9.1874e-08	-9.3434e-08	-8.5801e-08	-8.5188e-08	-8.9144e-08	-7.8168e-08	-6.6969e-08	-6.6969e-08	-7.1816e-08	-7.6719e-08	-8.5021e-08	-8.9589e-08	-9.3044e-08	-9.9339e-08	-1.0608e-07	-1.1165e-07	-1.1316e-07	-1.1672e-07	-1.1968e-07	-1.1862e-07	-1.2163e-07	-1.243e-07	-1.2631e-07	-1.2853e-07	-1.2647e-07	-1.2525e-07	-1.1906e-07	-1.1505e-07	-1.1594e-07	-1.1839e-07	-1.2124e-07	-1.1204e-07	-8.3572e-08	-1.0101e-07	-1.0291e-07	-1.0235e-07	-1.0608e-07	-1.1327e-07	-1.3093e-07
-5.4433e-08	-5.9392e-08	-6.2958e-08	-6.3181e-08	-6.9811e-08	-7.3711e-08	-7.5772e-08	-8.1956e-08	-8.4854e-08	-8.7138e-08	-8.7026e-08	-8.8308e-08	-9.1874e-08	-9.5997e-08	-9.8838e-08	-1.0084e-07	-1.0179e-07	-9.7222e-08	-1.0068e-07	-1.0402e-07	-1.0179e-07	-1.0502e-07	-1.0313e-07	-1.0157e-07	-1.0998e-07	-1.1115e-07	-1.1288e-07	-1.1422e-07	-1.1126e-07	-1.1505e-07	-1.0625e-07	-1.1338e-07	-1.121e-07	-1.0669e-07	-1.0246e-07	-9.0704e-08	-8.5689e-08	-9.9005e-08	-9.7612e-08	-9.7612e-08	-1.0135e-07	-1.0959e-07	-1.2001e-07	-1.1059e-07	-1.0519e-07	-1.048e-07	-1.2313e-07	-1.2742e-07	-1.1711e-07	-1.2519e-07
-6.3571e-08	-6.8251e-08	-7.2931e-08	-7.7109e-08	-8.0954e-08	-8.3405e-08	-8.5912e-08	-8.9645e-08	-9.1651e-08	-9.3879e-08	-9.6609e-08	-9.8504e-08	-1.0079e-07	-1.033e-07	-1.0497e-07	-1.0318e-07	-1.0803e-07	-1.0915e-07	-1.1238e-07	-1.1293e-07	-1.1539e-07	-1.1522e-07	-1.1878e-07	-1.1979e-07	-1.1795e-07	-1.209e-07	-1.214e-07	-1.2135e-07	-1.1695e-07	-1.2051e-07	-1.194e-07	-1.2051e-07	-1.0931e-07	-9.6442e-08	-9.0704e-08	-8.9478e-08	-9.2877e-08	-9.0035e-08	-8.8419e-08	-8.9367e-08	-9.3155e-08	-1.082e-07	-1.1583e-07	-1.1494e-07	-1.2391e-07	-1.3461e-07	-1.2352e-07	-1.2653e-07	-1.2107e-07	-1.3143e-07
-5.7999e-08	-6.2791e-08	-6.6969e-08	-6.7749e-08	-6.9699e-08	-7.5215e-08	-8.0006e-08	-8.3126e-08	-8.7918e-08	-8.9812e-08	-9.3601e-08	-9.2932e-08	-9.7167e-08	-1.0006e-07	-1.0285e-07	-1.0463e-07	-1.0675e-07	-1.0798e-07	-1.0864e-07	-1.0853e-07	-1.087e-07	-1.1121e-07	-1.0931e-07	-1.0001e-07	-9.9228e-08	-1.0408e-07	-1.092e-07	-1.111e-07	-1.0998e-07	-1.1505e-07	-1.2085e-07	-1.219e-07	-1.0603e-07	-9.1595e-08	-8.5745e-08	-9.3211e-08	-9.0759e-08	-8.8587e-08	-9.7055e-08	-1.0335e-07	-1.0447e-07	-1.0736e-07	-1.2809e-07	-1.1839e-07	-1.2346e-07	-1.2725e-07	-1.3026e-07	-1.3221e-07	-1.3711e-07	-1.3567e-07
# Channel: Scaled Data 4
# Width: 75.0 µm
# Height: 52.7 µm
# Value units: m
2.7853e-07	2.7356e-07	2.6947e-07	2.6628e-07	2.6364e-07	2.6117e-07	2.6388e-07	2.6214e-07	2.6385e-07	2.7508e-07	2.7445e-07	2.731e-07	2.699e-07	2.8337e-07	3.0107e-07	3.6969e-07	3.5435e-07	3.7222e-07	4.0223e-07	3.1931e-07	2.9076e-07	2.7509e-07	2.4114e-07	2.3577e-07	2.3999e-07	2.3418e-07	2.3015e-07	2.2801e-07	2.2888e-07	2.3511e-07	2.3442e-07	2.5596e-07	2.765e-07	3.2685e-07	4.3291e-07	4.7619e-07	5.6871e-07	6.3455e-07	6.9108e-07	7.299e-07	7.3071e-07	7.3159e-07	7.2973e-07	7.4548e-07	7.4557e-07	7.5174e-07	7.6743e-07	7.7605e-07	7.85e-07	7.8164e-07
2.7671e-07	2.7212e-07	2.6809e-07	2.6657e-07	2.6416e-07	2.613e-07	2.6066e-07	2.5758e-07	2.5812e-07	2.6412e-07	2.6594e-07	2.6676e-07	2.6975e-07	2.6845e-07	2.7957e-07	2.8641e-07	3.2444e-07	3.5902e-07	3.1633e-07	2.9876e-07	2.949e-07	2.6418e-07	2.4767e-07	2.4938e-07	2.4257e-07	2.3581e-07	2.3378e-07	2.3271e-07	2.323e-07	2.315e-07	2.2998e-07	2.2901e-07	2.4353e-07	2.741e-07	3.4941e-07	3.8717e-07	4.9284e-07	5.3166e-07	5.9744e-07	6.7893e-07	7.3056e-07	7.3583e-07	7.4128e-07	7.3959e-07	7.3806e-07	7.5376e-07	7.724e-07	7.7913e-07	8.024e-07	8.0873e-07
2.6246e-07	2.5787e-07	2.544e-07	2.5137e-07	2.4874e-07	2.4627e-07	2.443e-07	2.4211e-07	2.402e-07	2.4107e-07	2.4133e-07	2.4265e-07	2.5277e-07	2.5543e-07	2.5201e-07	2.4882e-07	2.5013e-07	2.675e-07	2.6286e-07	2.5916e-07	2.4895e-07	2.5138e-07	2.4624e-07	2.4811e-07	2.4425e-07	2.3861e-07	2.3368e-07	2.3188e-07	2.322e-07	2.3909e-07	2.3467e-07	2.3744e-07	2.343e-07	2.4208e-07	2.8017e-07	3.0082e-07	3.4521e-07	4.4927e-07	4.7271e-07	5.4907e-07	6.051e-07	6.9345e-07	7.4107e-07	7.5542e-07	7.4181e-07	7.5851e-07	7.6618e-07	7.8544e-07	8.1344e-07	8.3092e-07
2.7428e-07	2.6903e-07	2.645e-07	2.6153e-07	2.5811e-07	2.5609e-07	2.544e-07	2.5711e-07	2.5063e-07	2.476e-07	2.4602e-07	2.445e-07	2.4866e-07	2.487e-07	2.4768e-07	2.4454e-07	2.4491e-07	2.44e-07	2.4783e-07	2.4452e-07	2.4673e-07	2.3958e-07	2.3767e-07	2.4423e-07	2.4009e-07	2.3305e-07	2.2985e-07	2.2783e-07	2.2586e-07	2.2367e-07	2.2142e-07	2.1996e-07	2.1805e-07	2.1585e-07	2.165e-07	2.366e-07	2.6466e-07	2.8793e-07	3.5616e-07	3.9765e-07	4.7241e-07	5.3975e-07	6.262e-07	7.0323e-07	7.3653e-07	7.5384e-07	7.6937e-07	7.8055e-07	8.295e-07	8.3818e-07
2.782e-07	2.7266e-07	2.6847e-07	2.6449e-07	2.6258e-07	2.6006e-07	2.577e-07	2.5523e-07	2.5638e-07	2.5291e-07	2.5127e-07	2.4886e-07	2.4723e-07	2.4548e-07	2.4396e-07	2.4333e-07	2.4331e-07	2.4084e-07	2.3887e-07	2.3685e-07	2.3455e-07	2.3286e-07	2.3189e-07	2.3226e-07	2.3119e-07	2.2944e-07	2.2853e-07	2.269e-07	2.2588e-07	2.2346e-07	2.2517e-07	2.2677e-07	2.2564e-07	2.2835e-07	2.2599e-07	2.2553e-07	2.3403e-07	2.4577e-07	2.5439e-07	2.888e-07	3.5364e-07	3.7479e-07	4.5723e-07	5.4151e-07	6.0238e-07	6.9814e-07	7.4203e-07	7.6769e-07	8.3676e-07	8.4003e-07
2.8401e-07	2.7569e-07	2.7205e-07	2.6791e-07	2.6521e-07	2.6291e-07	2.6261e-07	2.5859e-07	2.5662e-07	2.5454e-07	2.5391e-07	2.5194e-07	2.4964e-07	2.4655e-07	2.4542e-07	2.4345e-07	2.4187e-07	2.4013e-07	2.3872e-07	2.3725e-07	2.3935e-07	2.3683e-07	2.348e-07	2.335e-07	2.3192e-07	2.3113e-07	2.2949e-07	2.2897e-07	2.3263e-07	2.3261e-07	2.3739e-07	2.377e-07	2.3228e-07	2.3187e-07	2.2701e-07	2.2303e-07	2.2318e-07	2.3147e-07	2.2827e-07	2.2329e-07	2.2138e-07	2.8766e-07	3.3177e-07	3.7142e-07	4.8501e-07	5.017e-07	6.0715e-07	6.9517e-07	7.6585e-07	8.0138e-07
2.8352e-07	2.7726e-07	2.7435e-07	2.7015e-07	2.674e-07	2.6449e-07	2.6202e-07	2.6161e-07	2.5775e-07	2.5633e-07	2.5503e-07	2.5245e-07	2.4993e-07	2.4824e-07	2.4605e-07	2.4447e-07	2.4272e-07	2.4137e-07	2.4001e-07	2.3922e-07	2.3747e-07	2.3684e-07	2.3509e-07	2.3452e-07	2.3294e-07	2.3147e-07	2.3023e-07	2.2904e-07	2.2735e-07	2.3541e-07	2.3556e-07	2.3187e-07	2.2856e-07	2.2659e-07	2.2524e-07	2.2522e-07	2.2542e-07	2.2847e-07	2.3051e-07	2.3267e-07	2.297e-07	2.245e-07	2.3841e-07	2.687e-07	3.3554e-07	4.0511e-07	4.2816e-07	5.7684e-07	5.7866e-07	6.9787e-07
2.8259e-07	2.7783e-07	2.7369e-07	2.7066e-07	2.697e-07	2.6712e-07	2.6353e-07	2.6168e-07	2.5921e-07	2.5785e-07	2.5633e-07	2.5414e-07	2.5223e-07	2.5043e-07	2.5085e-07	2.4727e-07	2.4591e-07	2.4478e-07	2.4482e-07	2.4391e-07	2.4166e-07	2.3964e-07	2.3856e-07	2.3698e-07	2.3892e-07	2.4191e-07	2.3765e-07	2.3674e-07	2.3372e-07	2.337e-07	2.3524e-07	2.3233e-07	2.3058e-07	2.2923e-07	2.2793e-07	2.2573e-07	2.2377e-07	2.228e-07	2.2975e-07	2.416e-07	2.4241e-07	2.3894e-07	2.3001e-07	2.2514e-07	2.4669e-07	2.7982e-07	3.2114e-07	3.843e-07	4.756e-07	4.9213e-07
2.8633e-07	2.8191e-07	2.785e-07	2.7497e-07	2.7155e-07	2.6919e-07	2.7034e-07	2.6832e-07	2.6602e-07	2.6661e-07	2.6409e-07	2.5967e-07	2.577e-07	2.5512e-07	2.5571e-07	2.5319e-07	2.5245e-07	2.4725e-07	2.474e-07	2.5172e-07	2.5594e-07	2.4517e-07	2.4398e-07	2.4134e-07	2.45e-07	2.3824e-07	2.3544e-07	2.3492e-07	2.3256e-07	2.316e-07	2.3058e-07	2.2838e-07	2.2731e-07	2.2595e-07	2.2488e-07	2.2397e-07	2.2467e-07	2.2761e-07	2.3154e-07	2.4217e-07	2.4304e-07	2.3595e-07	2.4206e-07	2.387e-07	2.3043e-07	2.2891e-07	2.5731e-07	3.1211e-07	3.3226e-07	3.6149e-07
2.9108e-07	2.8533e-07	2.8068e-07	2.7649e-07	2.7469e-07	2.7238e-07	2.6924e-07	2.6778e-07	2.6809e-07	2.6551e-07	2.665e-07	2.6163e-07	2.5955e-07	2.5842e-07	2.5545e-07	2.5409e-07	2.5235e-07	2.506e-07	2.5131e-07	2.5096e-07	2.5339e-07	2.4736e-07	2.4505e-07	2.4659e-07	2.4931e-07	2.4556e-07	2.3946e-07	2.3627e-07	2.3531e-07	2.3334e-07	2.3555e-07	2.3241e-07	2.3122e-07	2.3009e-07	2.2962e-07	2.2738e-07	2.263e-07	2.2472e-07	2.232e-07	2.2703e-07	2.2879e-07	2.2432e-07	2.3561e-07	2.3966e-07	2.3034e-07	2.2463e-07	2.2378e-07	2.3017e-07	2.6024e-07	2.9844e-07
2.8892e-07	2.8434e-07	2.8086e-07	2.7812e-07	2.7498e-07	2.7139e-07	2.6926e-07	2.684e-07	2.6816e-07	2.6525e-07	2.6283e-07	2.6098e-07	2.5734e-07	2.5565e-07	2.5362e-07	2.5205e-07	2.5036e-07	2.4883e-07	2.535e-07	2.5521e-07	2.5162e-07	2.4904e-07	2.4629e-07	2.4728e-07	2.4915e-07	2.4451e-07	2.4394e-07	2.3935e-07	2.3905e-07	2.4082e-07	2.3528e-07	2.3521e-07	2.3291e-07	2.374e-07	2.3577e-07	2.2878e-07	2.2565e-07	2.2502e-07	2.26e-07	2.2375e-07	2.2234e-07	2.2121e-07	2.2052e-07	2.1961e-07	2.2088e-07	2.3145e-07	2.3811e-07	2.3425e-07	2.2699e-07	2.263e-07
2.8955e-07	2.8502e-07	2.8233e-07	2.798e-07	2.7594e-07	2.7352e-07	2.7028e-07	2.6909e-07	2.679e-07	2.6593e-07	2.6485e-07	2.6272e-07	2.5964e-07	2.58e-07	2.5603e-07	2.5434e-07	2.5215e-07	2.5175e-07	2.5072e-07	2.492e-07	2.4746e-07	2.4749e-07	2.4586e-07	2.4935e-07	2.4989e-07	2.4452e-07	2.4267e-07	2.4103e-07	2.3979e-07	2.3938e-07	2.4377e-07	2.4074e-07	2.4189e-07	2.397e-07	2.355e-07	2.3487e-07	2.3653e-07	2.3924e-07	2.3097e-07	2.2906e-07	2.2748e-07	2.2585e-07	2.2527e-07	2.237e-07	2.2184e-07	2.2444e-07	2.2464e-07	2.2401e-07	2.2455e-07	2.2414e-07
2.914e-07	2.857e-07	2.8312e-07	2.8238e-07	2.8258e-07	2.7476e-07	2.7213e-07	2.6977e-07	2.6702e-07	2.6633e-07	2.6565e-07	2.6507e-07	2.6277e-07	2.6086e-07	2.6758e-07	2.6829e-07	2.6186e-07	2.5895e-07	2.5726e-07	2.5495e-07	2.5282e-07	2.5107e-07	2.4883e-07	2.4697e-07	2.4656e-07	2.4387e-07	2.4285e-07	2.4116e-07	2.3969e-07	2.3906e-07	2.4367e-07	2.4415e-07	2.4486e-07	2.4138e-07	2.3541e-07	2.3282e-07	2.3431e-07	2.2967e-07	2.282e-07	2.2712e-07	2.2582e-07	2.2441e-07	2.2506e-07	2.2477e-07	2.2436e-07	2.3381e-07	2.3123e-07	2.2954e-07	2.2752e-07	2.2522e-07
2.9359e-07	2.8783e-07	2.833e-07	2.8228e-07	2.8399e-07	2.769e-07	2.7409e-07	2.7223e-07	2.6988e-07	2.6808e-07	2.6561e-07	2.6291e-07	2.6234e-07	2.6338e-07	2.6057e-07	2.6145e-07	2.6065e-07	2.5812e-07	2.566e-07	2.5558e-07	2.5228e-07	2.5131e-07	2.509e-07	2.4866e-07	2.4775e-07	2.4606e-07	2.4336e-07	2.424e-07	2.4143e-07	2.4052e-07	2.3828e-07	2.3848e-07	2.4248e-07	2.4084e-07	2.3926e-07	2.3434e-07	2.3327e-07	2.3141e-07	2.3044e-07	2.2976e-07	2.2829e-07	2.2721e-07	2.2513e-07	2.2361e-07	2.2354e-07	2.2213e-07	2.2133e-07	2.2103e-07	2.204e-07	2.186e-07
2.9628e-07	2.9202e-07	2.9089e-07	2.8798e-07	2.8584e-07	2.7852e-07	2.7639e-07	2.7353e-07	2.7117e-07	2.6898e-07	2.6673e-07	2.6571e-07	2.6313e-07	2.6167e-07	2.6031e-07	2.5856e-07	2.5671e-07	2.5513e-07	2.5283e-07	2.5147e-07	2.5028e-07	2.4876e-07	2.4724e-07	2.4577e-07	2.4759e-07	2.5092e-07	2.4427e-07	2.4264e-07	2.4111e-07	2.3998e-07	2.4013e-07	2.3772e-07	2.3731e-07	2.354e-07	2.346e-07	2.3313e-07	2.3189e-07	2.3092e-07	2.3469e-07	2.3802e-07	2.336e-07	2.3252e-07	2.296e-07	2.2881e-07	2.3559e-07	2.2944e-07	2.2881e-07	2.2807e-07	2.2532e-07	2.2329e-07
2.9484e-07	2.8942e-07	2.8567e-07	2.8326e-07	2.8079e-07	2.782e-07	2.754e-07	2.7315e-07	2.7107e-07	2.6888e-07	2.6658e-07	2.65e-07	2.6326e-07	2.614e-07	2.5938e-07	2.5824e-07	2.5683e-07	2.5553e-07	2.5407e-07	2.5271e-07	2.5236e-07	2.5329e-07	2.5177e-07	2.5013e-07	2.5039e-07	2.5076e-07	2.4534e-07	2.4488e-07	2.4224e-07	2.4161e-07	2.4053e-07	2.3923e-07	2.3799e-07	2.3714e-07	2.3556e-07	2.3476e-07	2.3368e-07	2.3272e-07	2.3543e-07	2.392e-07	2.3545e-07	2.3649e-07	2.3435e-07	2.3188e-07	2.2958e-07	2.2773e-07	2.2626e-07	2.2697e-07	2.2711e-07	2.2732e-07
2.9669e-07	2.9127e-07	2.878e-07	2.8472e-07	2.8152e-07	2.785e-07	2.758e-07	2.7311e-07	2.7371e-07	2.7057e-07	2.6877e-07	2.6741e-07	2.6572e-07	2.6537e-07	2.7065e-07	2.6617e-07	2.6041e-07	2.5984e-07	2.5848e-07	2.5668e-07	2.5516e-07	2.5514e-07	2.5356e-07	2.5182e-07	2.5068e-07	2.4966e-07	2.5199e-07	2.5564e-07	2.5802e-07	2.453e-07	2.4328e-07	2.4259e-07	2.4107e-07	2.4021e-07	2.3875e-07	2.3817e-07	2.3698e-07	2.3552e-07	2.3589e-07	2.347e-07	2.3223e-07	2.3149e-07	2.2963e-07	2.2844e-07	2.2737e-07	2.2629e-07	2.246e-07	2.2664e-07	2.3855e-07	2.3112e-07
2.9983e-07	2.9546e-07	2.9082e-07	2.8768e-07	2.8505e-07	2.8291e-07	2.8005e-07	2.7769e-07	2.7595e-07	2.7342e-07	2.7146e-07	2.6965e-07	2.6791e-07	2.6928e-07	2.7539e-07	2.7783e-07	2.6672e-07	2.6514e-07	2.6357e-07	2.6126e-07	2.5924e-07	2.6568e-07	2.5391e-07	2.5428e-07	2.5371e-07	2.5263e-07	2.5167e-07	2.5064e-07	2.4856e-07	2.4543e-07	2.4463e-07	2.4344e-07	2.422e-07	2.4368e-07	2.4272e-07	2.3924e-07	2.3822e-07	2.3665e-07	2.3841e-07	2.3672e-07	2.3537e-07	2.3462e-07	2.3455e-07	2.3347e-07	2.3106e-07	2.297e-07	2.2879e-07	2.2878e-07	2.3372e-07	2.3024e-07
2.9917e-07	2.9453e-07	2.9084e-07	2.8697e-07	2.8528e-07	2.8181e-07	2.7918e-07	2.7659e-07	2.7424e-07	2.7444e-07	2.7075e-07	2.6984e-07	2.6787e-07	2.6612e-07	2.6627e-07	2.6581e-07	2.6334e-07	2.6215e-07	2.6024e-07	2.5849e-07	2.5753e-07	2.5617e-07	2.5404e-07	2.5341e-07	2.5261e-07	2.5164e-07	2.5029e-07	2.4882e-07	2.5053e-07	2.4862e-07	2.4704e-07	2.4535e-07	2.4394e-07	2.4281e-07	2.4139e-07	2.4021e-07	2.393e-07	2.3789e-07	2.367e-07	2.3612e-07	2.3404e-07	2.3603e-07	2.3456e-07	2.3293e-07	2.3157e-07	2.31e-07	2.2998e-07	2.2885e-07	2.2771e-07	2.2758e-07
3.0682e-07	3.0179e-07	2.9715e-07	2.9451e-07	2.9198e-07	2.894e-07	2.8671e-07	2.8446e-07	2.8227e-07	2.8058e-07	2.8708e-07	2.8417e-07	2.8103e-07	2.7505e-07	2.7163e-07	2.7039e-07	2.6959e-07	2.6879e-07	2.6482e-07	2.6363e-07	2.6222e-07	2.6042e-07	2.5895e-07	2.576e-07	2.5669e-07	2.5539e-07	2.5437e-07	2.5268e-07	2.5143e-07	2.4902e-07	2.4995e-07	2.4871e-07	2.4663e-07	2.4505e-07	2.4403e-07	2.4245e-07	2.4148e-07	2.4035e-07	2.3927e-07	2.3803e-07	2.3684e-07	2.3577e-07	2.3447e-07	2.3294e-07	2.3209e-07	2.3107e-07	2.2988e-07	2.2947e-07	2.2895e-07	2.2715e-07
3.172e-07	3.154e-07	3.0958e-07	3.0182e-07	2.9818e-07	2.9488e-07	2.9274e-07	2.9005e-07	2.8719e-07	2.8946e-07	2.9228e-07	2.8574e-07	2.8054e-07	2.7696e-07	2.7588e-07	2.7436e-07	2.7239e-07	2.697e-07	2.6829e-07	2.6888e-07	2.6948e-07	2.6539e-07	2.6108e-07	2.5956e-07	2.5876e-07	2.5746e-07	2.5561e-07	2.547e-07	2.5329e-07	2.5221e-07	2.5035e-07	2.4922e-07	2.4753e-07	2.4645e-07	2.451e-07	2.4397e-07	2.4283e-07	2.4181e-07	2.4085e-07	2.4863e-07	2.3964e-07	2.3817e-07	2.3671e-07	2.3546e-07	2.3494e-07	2.3387e-07	2.3307e-07	2.3144e-07	2.3003e-07	2.2878e-07
3.1922e-07	3.1402e-07	3.1021e-07	3.0278e-07	3.0009e-07	2.9489e-07	2.9348e-07	2.9346e-07	2.8497e-07	2.8212e-07	2.8137e-07	2.7974e-07	2.7749e-07	2.7608e-07	2.7339e-07	2.7192e-07	2.714e-07	2.7623e-07	2.7365e-07	2.7263e-07	2.7913e-07	2.7794e-07	2.7458e-07	2.7568e-07	2.7755e-07	2.7141e-07	2.6392e-07	2.6095e-07	2.6015e-07	2.5841e-07	2.7438e-07	2.6144e-07	2.5685e-07	2.5577e-07	2.5353e-07	2.5267e-07	2.521e-07	2.5057e-07	2.4777e-07	2.4519e-07	2.4395e-07	2.432e-07	2.4218e-07	2.4211e-07	2.3942e-07	2.3851e-07	2.3615e-07	2.3396e-07	2.3299e-07	2.3247e-07
3.1466e-07	3.0891e-07	3.0437e-07	2.9784e-07	2.9587e-07	2.9262e-07	2.9282e-07	2.9381e-07	2.8744e-07	2.8458e-07	2.8139e-07	2.797e-07	2.7817e-07	2.766e-07	2.7441e-07	2.7288e-07	2.7114e-07	2.6973e-07	2.6781e-07	2.7587e-07	2.8371e-07	2.8525e-07	2.8925e-07	2.9174e-07	2.9244e-07	2.8479e-07	2.7692e-07	2.7027e-07	2.6312e-07	2.6065e-07	2.6308e-07	2.6117e-07	2.577e-07	2.569e-07	2.546e-07	2.5308e-07	2.5217e-07	2.5092e-07	2.4912e-07	2.4732e-07	2.468e-07	2.4578e-07	2.4381e-07	2.4229e-07	2.396e-07	2.4047e-07	2.4012e-07	2.3692e-07	2.3523e-07	2.3566e-07
3.1072e-07	3.0691e-07	2.9949e-07	2.9568e-07	2.9282e-07	2.899e-07	2.8805e-07	2.8959e-07	2.8428e-07	2.8209e-07	2.8056e-07	2.7882e-07	2.7691e-07	2.7533e-07	2.7364e-07	2.7507e-07	2.7193e-07	2.7069e-07	2.6922e-07	2.6987e-07	2.7364e-07	2.7407e-07	2.7862e-07	2.8701e-07	2.8984e-07	2.8185e-07	2.7537e-07	2.6755e-07	2.6308e-07	2.615e-07	2.607e-07	2.584e-07	2.5699e-07	2.5586e-07	2.5406e-07	2.5287e-07	2.5179e-07	2.4982e-07	2.4863e-07	2.4806e-07	2.4704e-07	2.4585e-07	2.4433e-07	2.4353e-07	2.4067e-07	2.4288e-07	2.4074e-07	2.3788e-07	2.3842e-07	2.3328e-07
3.0745e-07	3.0358e-07	2.9833e-07	2.9519e-07	2.9189e-07	2.8897e-07	2.8678e-07	2.8459e-07	2.8234e-07	2.7998e-07	2.7796e-07	2.761e-07	2.8149e-07	2.7445e-07	2.7215e-07	2.7046e-07	2.6871e-07	2.6686e-07	2.6595e-07	2.6621e-07	2.712e-07	2.7609e-07	2.7446e-07	2.76e-07	2.7787e-07	2.7423e-07	2.6792e-07	2.625e-07	2.6125e-07	2.5973e-07	2.5832e-07	2.5719e-07	2.5594e-07	2.5392e-07	2.5139e-07	2.5004e-07	2.498e-07	2.4761e-07	2.4681e-07	2.4529e-07	2.4393e-07	2.4291e-07	2.4573e-07	2.407e-07	2.3957e-07	2.3905e-07	2.3836e-07	2.3723e-07	2.3621e-07	2.3524e-07
3.1426e-07	3.104e-07	3.0692e-07	3.0356e-07	3.007e-07	2.9773e-07	2.951e-07	2.9307e-07	2.9038e-07	2.8852e-07	2.8566e-07	2.8559e-07	2.9493e-07	2.8706e-07	2.8214e-07	2.8033e-07	2.7959e-07	2.779e-07	2.785e-07	2.7636e-07	2.7194e-07	2.7153e-07	2.7308e-07	2.7518e-07	2.7822e-07	2.7475e-07	2.681e-07	2.6769e-07	2.6662e-07	2.6554e-07	2.6212e-07	2.6116e-07	2.5858e-07	2.58e-07	2.5581e-07	2.5412e-07	2.5366e-07	2.5135e-07	2.4961e-07	2.4926e-07	2.4801e-07	2.4627e-07	2.4547e-07	2.4417e-07	2.4387e-07	2.4291e-07	2.4139e-07	2.3958e-07	2.3906e-07	2.3788e-07
3.1912e-07	3.1069e-07	3.0543e-07	3.0257e-07	2.991e-07	2.968e-07	2.9366e-07	2.9186e-07	2.8855e-07	2.8659e-07	2.8462e-07	2.8354e-07	2.8235e-07	2.8144e-07	2.7897e-07	2.7773e-07	2.771e-07	2.7535e-07	2.7422e-07	2.7242e-07	2.7134e-07	2.7027e-07	2.6869e-07	2.7062e-07	2.7851e-07	2.7471e-07	2.6661e-07	2.6609e-07	2.6518e-07	2.6383e-07	2.6163e-07	2.6061e-07	2.5915e-07	2.5796e-07	2.5677e-07	2.5514e-07	2.588e-07	2.6741e-07	2.5726e-07	2.5401e-07	2.5315e-07	2.5124e-07	2.4961e-07	2.5466e-07	2.4979e-07	2.4582e-07	2.4457e-07	2.43e-07	2.422e-07	2.4006e-07
3.1774e-07	3.1315e-07	3.0918e-07	3.0955e-07	3.0742e-07	3.0277e-07	3.0571e-07	3.038e-07	2.9782e-07	2.9412e-07	2.931e-07	2.9197e-07	2.8777e-07	2.8708e-07	2.8422e-07	2.8231e-07	2.7995e-07	2.7893e-07	2.7724e-07	2.7645e-07	2.7487e-07	2.7312e-07	2.721e-07	2.7036e-07	2.7362e-07	2.6726e-07	2.6557e-07	2.6477e-07	2.7049e-07	2.6445e-07	2.6343e-07	2.623e-07	2.6055e-07	2.592e-07	2.5768e-07	2.5649e-07	2.5686e-07	2.5829e-07	2.5682e-07	2.5508e-07	2.5372e-07	2.5265e-07	2.5787e-07	2.574e-07	2.5766e-07	2.5263e-07	2.51e-07	2.4992e-07	2.4968e-07	2.4905e-07
3.1926e-07	3.1456e-07	3.107e-07	3.0862e-07	3.1061e-07	3.0769e-07	3.0823e-07	3.0738e-07	3.0541e-07	3.026e-07	2.944e-07	2.8953e-07	2.9091e-07	2.9161e-07	2.8301e-07	2.8489e-07	2.7908e-07	2.7872e-07	2.8366e-07	2.788e-07	2.7689e-07	2.738e-07	2.7167e-07	2.7048e-07	2.6896e-07	2.6755e-07	2.6525e-07	2.6445e-07	2.6326e-07	2.6213e-07	2.6094e-07	2.5936e-07	2.5795e-07	2.5648e-07	2.5585e-07	2.5422e-07	2.5303e-07	2.519e-07	2.506e-07	2.498e-07	2.4995e-07	2.4765e-07	2.4662e-07	2.4494e-07	2.4364e-07	2.4351e-07	2.4265e-07	2.4158e-07	2.4847e-07	2.553e-07
3.2546e-07	3.2003e-07	3.1595e-07	3.1142e-07	3.0783e-07	3.101e-07	3.1109e-07	3.1151e-07	3.1088e-07	3.1181e-07	3.0522e-07	2.9963e-07	3.0496e-07	3.0082e-07	2.9289e-07	2.8953e-07	2.8845e-07	2.93e-07	2.9733e-07	2.972e-07	2.9295e-07	2.853e-07	2.8177e-07	2.8064e-07	2.8101e-07	2.7726e-07	2.7579e-07	2.7471e-07	2.7313e-07	2.7089e-07	2.7065e-07	2.6768e-07	2.6727e-07	2.6575e-07	2.6445e-07	2.6264e-07	2.6134e-07	2.6049e-07	2.5908e-07	2.5828e-07	2.5626e-07	2.5596e-07	2.6023e-07	2.5197e-07	2.5134e-07	2.5048e-07	2.4935e-07	2.4777e-07	2.4675e-07	2.5242e-07
3.1929e-07	3.1381e-07	3.1095e-07	3.0814e-07	3.0451e-07	3.0181e-07	3.0854e-07	3.1526e-07	3.1329e-07	3.1116e-07	3.0935e-07	3.0443e-07	2.9968e-07	2.9314e-07	2.8973e-07	2.891e-07	2.878e-07	2.9207e-07	2.9673e-07	2.9465e-07	2.9474e-07	2.886e-07	2.8206e-07	2.7686e-07	2.7584e-07	2.7448e-07	2.7302e-07	2.7172e-07	2.6969e-07	2.675e-07	2.6693e-07	2.6596e-07	2.6438e-07	2.6303e-07	2.6201e-07	2.6026e-07	2.5818e-07	2.5711e-07	2.5636e-07	2.554e-07	2.5382e-07	2.5319e-07	2.5217e-07	2.5053e-07	2.499e-07	2.4905e-07	2.487e-07	2.4561e-07	2.4532e-07	2.4435e-07
3.2621e-07	3.1755e-07	3.1408e-07	3.1044e-07	3.0708e-07	3.0456e-07	3.0443e-07	3.0875e-07	3.0289e-07	2.9891e-07	2.9862e-07	2.9637e-07	2.9039e-07	2.8864e-07	2.8734e-07	2.8621e-07	2.8441e-07	2.8194e-07	2.8281e-07	2.8074e-07	2.7821e-07	2.7507e-07	2.7316e-07	2.7214e-07	2.7056e-07	2.6976e-07	2.6846e-07	2.6666e-07	2.6558e-07	2.6401e-07	2.6315e-07	2.682e-07	2.6523e-07	2.6315e-07	2.6169e-07	2.6089e-07	2.5842e-07	2.6002e-07	2.5916e-07	2.5469e-07	2.5317e-07	2.5315e-07	2.5157e-07	2.4888e-07	2.4802e-07	2.4722e-07	2.4576e-07	2.4552e-07	2.4316e-07	2.4186e-07
3.0516e-07	2.9918e-07	2.9543e-07	2.9151e-07	2.8938e-07	2.8708e-07	2.8455e-07	2.8141e-07	2.7917e-07	2.7658e-07	2.7484e-07	2.7332e-07	2.7152e-07	2.7791e-07	2.7789e-07	2.6745e-07	2.6526e-07	2.6357e-07	2.6177e-07	2.5924e-07	2.5761e-07	2.5603e-07	2.5479e-07	2.5343e-07	2.5224e-07	2.5089e-07	2.4948e-07	2.4868e-07	2.4732e-07	2.4597e-07	2.4478e-07	2.4889e-07	2.5249e-07	2.4495e-07	2.432e-07	2.4168e-07	2.4033e-07	2.3886e-07	2.3789e-07	2.3827e-07	2.4438e-07	2.4347e-07	2.3916e-07	2.3725e-07	2.3623e-07	2.3504e-07	2.3413e-07	2.3066e-07	2.3275e-07	2.2917e-07
3.0284e-07	2.973e-07	2.9589e-07	2.9448e-07	2.8906e-07	2.8921e-07	2.8339e-07	2.8115e-07	2.7868e-07	2.7671e-07	2.7457e-07	2.7272e-07	2.7203e-07	2.6861e-07	2.672e-07	2.6551e-07	2.6366e-07	2.6213e-07	2.6039e-07	2.5903e-07	2.579e-07	2.6201e-07	2.5625e-07	2.5411e-07	2.5259e-07	2.5124e-07	2.5027e-07	2.488e-07	2.4751e-07	2.4648e-07	2.4507e-07	2.4611e-07	2.4966e-07	2.4524e-07	2.4645e-07	2.4448e-07	2.3867e-07	2.3826e-07	2.3936e-07	2.4647e-07	2.562e-07	2.5535e-07	2.4608e-07	2.4005e-07	2.3813e-07	2.3695e-07	2.3609e-07	2.344e-07	2.3321e-07	2.3074e-07
3.0987e-07	3.0489e-07	3.0198e-07	3.0285e-07	2.9704e-07	2.9502e-07	2.9243e-07	2.8935e-07	2.8694e-07	2.848e-07	2.8311e-07	2.8332e-07	2.8118e-07	2.8038e-07	2.7747e-07	2.7595e-07	2.7415e-07	2.7262e-07	2.7065e-07	2.6936e-07	2.6833e-07	2.6698e-07	2.6546e-07	2.6343e-07	2.6224e-07	2.6117e-07	2.6015e-07	2.5862e-07	2.5738e-07	2.5658e-07	2.5489e-07	2.5387e-07	2.567e-07	2.5462e-07	2.4964e-07	2.5012e-07	2.4893e-07	2.4897e-07	2.5029e-07	2.6103e-07	2.7076e-07	2.7236e-07	2.6805e-07	2.5934e-07	2.5202e-07	2.476e-07	2.4625e-07	2.4489e-07	2.4281e-07	2.4374e-07
3.2638e-07	3.219e-07	3.1709e-07	3.0799e-07	3.0413e-07	3.0155e-07	2.9858e-07	2.9828e-07	2.9436e-07	2.9306e-07	2.9137e-07	2.8862e-07	2.8732e-07	2.853e-07	2.8372e-07	2.8187e-07	2.8079e-07	2.7932e-07	2.7752e-07	2.76e-07	2.7476e-07	2.7307e-07	2.7165e-07	2.7242e-07	2.7128e-07	2.6926e-07	2.6796e-07	2.6644e-07	2.7467e-07	2.6612e-07	2.6516e-07	2.6609e-07	2.6378e-07	2.6221e-07	2.6085e-07	2.6351e-07	2.6037e-07	2.6035e-07	2.7014e-07	2.7631e-07	2.798e-07	2.8073e-07	2.8043e-07	2.7835e-07	2.7042e-07	2.597e-07	2.5423e-07	2.5293e-07	2.5341e-07	2.525e-07
3.2177e-07	3.1757e-07	3.1588e-07	3.1018e-07	3.081e-07	3.0518e-07	3.0204e-07	3.0013e-07	2.9766e-07	2.9564e-07	2.9389e-07	2.9488e-07	2.9074e-07	2.8999e-07	2.8719e-07	2.8556e-07	2.8426e-07	2.8262e-07	2.8088e-07	2.8036e-07	2.79e-07	2.7715e-07	2.7579e-07	2.7427e-07	2.7269e-07	2.715e-07	2.7015e-07	2.7002e-07	2.6838e-07	2.6708e-07	2.659e-07	2.6504e-07	2.6385e-07	2.6267e-07	2.6343e-07	2.6291e-07	2.6183e-07	2.6276e-07	2.7277e-07	2.7832e-07	2.8104e-07	2.8236e-07	2.8618e-07	2.8427e-07	2.7149e-07	2.644e-07	2.6132e-07	2.5957e-07	2.5833e-07	2.5742e-07
3.2824e-07	3.2405e-07	3.2029e-07	3.1732e-07	3.1853e-07	3.1144e-07	3.0947e-07	3.0722e-07	3.1155e-07	3.073e-07	2.9976e-07	2.9746e-07	2.951e-07	2.9335e-07	2.9161e-07	2.907e-07	2.8962e-07	2.8793e-07	2.8719e-07	2.8812e-07	2.8693e-07	2.8892e-07	2.8572e-07	2.8069e-07	2.7989e-07	2.7826e-07	2.7841e-07	2.7644e-07	2.7531e-07	2.7429e-07	2.7343e-07	2.7325e-07	2.7167e-07	2.7054e-07	2.6968e-07	2.695e-07	2.6814e-07	2.6751e-07	2.6671e-07	2.7154e-07	2.8088e-07	2.8209e-07	2.8129e-07	2.7977e-07	2.7351e-07	2.7177e-07	2.6813e-07	2.6716e-07	2.6603e-07	2.6501e-07
2.9416e-07	2.8913e-07	2.8471e-07	2.8151e-07	2.8166e-07	2.7624e-07	2.7338e-07	2.7152e-07	2.7134e-07	2.6987e-07	2.659e-07	2.6348e-07	2.6135e-07	2.5988e-07	2.583e-07	2.5695e-07	2.5565e-07	2.5424e-07	2.5244e-07	2.5153e-07	2.6037e-07	2.6531e-07	2.6005e-07	2.4911e-07	2.4414e-07	2.4278e-07	2.4159e-07	2.3996e-07	2.3827e-07	2.3764e-07	2.3634e-07	2.3526e-07	2.3407e-07	2.3289e-07	2.3142e-07	2.3073e-07	2.296e-07	2.278e-07	2.2683e-07	2.2665e-07	2.3399e-07	2.309e-07	2.2838e-07	2.268e-07	2.2634e-07	2.2732e-07	2.2886e-07	2.2344e-07	2.2247e-07	2.214e-07
2.876e-07	2.7321e-07	2.7397e-07	2.7412e-07	2.7287e-07	2.7129e-07	2.6994e-07	2.6819e-07	2.713e-07	2.6938e-07	2.6725e-07	2.6578e-07	2.6699e-07	2.6485e-07	2.6333e-07	2.612e-07	2.5939e-07	2.5798e-07	2.5641e-07	2.5561e-07	2.7665e-07	2.8933e-07	2.8285e-07	2.7013e-07	2.6577e-07	2.6491e-07	2.6322e-07	2.607e-07	2.5756e-07	2.5732e-07	2.5541e-07	2.5461e-07	2.5292e-07	2.5184e-07	2.5088e-07	2.4936e-07	2.4856e-07	2.4765e-07	2.4635e-07	2.4221e-07	2.4085e-07	2.4005e-07	2.3942e-07	2.3846e-07	2.3705e-07	2.3837e-07	2.4063e-07	2.3359e-07	2.3274e-07	2.3233e-07
2.9803e-07	2.9071e-07	2.8685e-07	2.8382e-07	2.8085e-07	2.7749e-07	2.7508e-07	2.7333e-07	2.7181e-07	2.694e-07	2.667e-07	2.6485e-07	2.6305e-07	2.6136e-07	2.595e-07	2.5764e-07	2.5607e-07	2.5449e-07	2.5486e-07	2.6008e-07	2.7176e-07	2.8918e-07	2.8108e-07	2.6379e-07	2.5508e-07	2.5356e-07	2.5288e-07	2.5191e-07	2.5005e-07	2.4887e-07	2.4684e-07	2.4744e-07	2.4396e-07	2.4161e-07	2.407e-07	2.3945e-07	2.3865e-07	2.3747e-07	2.3611e-07	2.3515e-07	2.334e-07	2.3227e-07	2.3147e-07	2.2967e-07	2.2865e-07	2.293e-07	2.3017e-07	2.2675e-07	2.2462e-07	2.265e-07
3.0986e-07	3.0165e-07	2.9812e-07	2.9849e-07	2.9418e-07	2.9043e-07	2.942e-07	2.9758e-07	2.9255e-07	2.8289e-07	2.8104e-07	2.7851e-07	2.7677e-07	2.7357e-07	2.7255e-07	2.7081e-07	2.7051e-07	2.6693e-07	2.6535e-07	2.7007e-07	2.7411e-07	2.8524e-07	2.7943e-07	2.6219e-07	2.566e-07	2.5541e-07	2.5439e-07	2.5287e-07	2.5179e-07	2.5083e-07	2.5204e-07	2.4951e-07	2.4715e-07	2.4658e-07	2.5141e-07	2.4548e-07	2.4457e-07	2.4322e-07	2.4225e-07	2.4118e-07	2.4043e-07	2.4064e-07	2.4268e-07	2.4422e-07	2.4838e-07	2.3973e-07	2.3537e-07	2.3323e-07	2.3282e-07	2.3203e-07
3.1572e-07	3.1041e-07	3.0666e-07	3.0307e-07	3.0183e-07	3.0371e-07	3.0647e-07	2.9815e-07	2.9373e-07	2.9149e-07	2.8997e-07	2.8855e-07	2.8592e-07	2.8417e-07	2.8059e-07	2.8007e-07	2.7738e-07	2.7602e-07	2.7411e-07	2.7894e-07	2.7792e-07	2.813e-07	2.7376e-07	2.6711e-07	2.6626e-07	2.6457e-07	2.6321e-07	2.6219e-07	2.6083e-07	2.5948e-07	2.5851e-07	2.5716e-07	2.553e-07	2.545e-07	2.5337e-07	2.5263e-07	2.5289e-07	2.5048e-07	2.4923e-07	2.4882e-07	2.4886e-07	2.5492e-07	2.6415e-07	2.668e-07	2.6495e-07	2.539e-07	2.5126e-07	2.4862e-07	2.4766e-07	2.4708e-07
3.0933e-07	3.0413e-07	3.0026e-07	2.9696e-07	2.9482e-07	2.9715e-07	2.8966e-07	2.8664e-07	2.8522e-07	2.8398e-07	2.9477e-07	3.0623e-07	2.9384e-07	2.8246e-07	2.7743e-07	2.7334e-07	2.716e-07	2.6968e-07	2.6811e-07	2.6653e-07	2.6473e-07	2.6593e-07	2.6163e-07	2.5966e-07	2.5853e-07	2.57e-07	2.6189e-07	2.5646e-07	2.5461e-07	2.532e-07	2.519e-07	2.5266e-07	2.4991e-07	2.4872e-07	2.4754e-07	2.4629e-07	2.4516e-07	2.4425e-07	2.4356e-07	2.4226e-07	2.4119e-07	2.4524e-07	2.499e-07	2.5094e-07	2.4708e-07	2.3998e-07	2.3857e-07	2.3699e-07	2.3508e-07	2.3417e-07
3.1926e-07	3.1439e-07	3.1192e-07	3.0867e-07	3.0615e-07	3.024e-07	3.026e-07	2.9868e-07	2.9761e-07	2.9586e-07	3.0816e-07	3.3884e-07	3.0511e-07	2.9568e-07	2.9276e-07	2.9074e-07	2.8916e-07	2.8641e-07	2.8495e-07	2.837e-07	2.8196e-07	2.8099e-07	2.7986e-07	2.7845e-07	2.7709e-07	2.7624e-07	2.7316e-07	2.6991e-07	2.6816e-07	2.6814e-07	2.6601e-07	2.6504e-07	2.6346e-07	2.615e-07	2.6031e-07	2.5929e-07	2.5804e-07	2.568e-07	2.5522e-07	2.5409e-07	2.5362e-07	2.5093e-07	2.4941e-07	2.4961e-07	2.4854e-07	2.4774e-07	2.47e-07	2.4547e-07	2.4429e-07	2.4304e-07
3.1749e-07	3.1207e-07	3.0859e-07	3.0551e-07	3.0282e-07	2.9935e-07	2.9755e-07	2.9535e-07	2.9383e-07	2.9309e-07	2.9898e-07	2.8949e-07	2.937e-07	2.8934e-07	2.8949e-07	2.8668e-07	2.8644e-07	2.8197e-07	2.7866e-07	2.7826e-07	2.7684e-07	2.7499e-07	2.7358e-07	2.72e-07	2.7064e-07	2.7386e-07	2.7038e-07	2.6719e-07	2.631e-07	2.6303e-07	2.6168e-07	2.6032e-07	2.5863e-07	2.5778e-07	2.5609e-07	2.5729e-07	2.5354e-07	2.5191e-07	2.5016e-07	2.5015e-07	2.4723e-07	2.4621e-07	2.4602e-07	2.4528e-07	2.4432e-07	2.4324e-07	2.4166e-07	2.407e-07	2.3917e-07	2.3804e-07
3.1984e-07	3.1453e-07	3.1028e-07	3.0681e-07	3.0367e-07	3.0248e-07	3.0608e-07	3.0573e-07	2.9908e-07	2.9589e-07	2.9253e-07	2.9179e-07	2.892e-07	2.8701e-07	2.8577e-07	2.8525e-07	2.8245e-07	2.826e-07	2.852e-07	2.7988e-07	2.7669e-07	2.7695e-07	2.7365e-07	2.7229e-07	2.7149e-07	2.7019e-07	2.6789e-07	2.6826e-07	2.6891e-07	2.6856e-07	2.6637e-07	2.6618e-07	2.6505e-07	2.6386e-07	2.6385e-07	2.7163e-07	2.7997e-07	2.8452e-07	2.8467e-07	2.7551e-07	2.6825e-07	2.6288e-07	2.613e-07	2.6012e-07	2.6015e-07	2.6131e-07	2.6006e-07	2.5353e-07	2.525e-07	2.5315e-07
3.2537e-07	3.1978e-07	3.1514e-07	3.1189e-07	3.0875e-07	3.0606e-07	3.0989e-07	3.1254e-07	3.0445e-07	2.9997e-07	2.9923e-07	2.9704e-07	2.934e-07	2.926e-07	2.9007e-07	2.8705e-07	2.8658e-07	2.8489e-07	2.8365e-07	2.8001e-07	2.7899e-07	2.7786e-07	2.7628e-07	2.7537e-07	2.7357e-07	2.7255e-07	2.7119e-07	2.6984e-07	2.7266e-07	2.7515e-07	2.7101e-07	2.7272e-07	2.7097e-07	2.7864e-07	2.716e-07	2.8368e-07	2.9068e-07	2.9707e-07	2.7237e-07	2.7313e-07	2.6308e-07	2.6992e-07	2.68e-07	2.6587e-07	2.6529e-07	2.6271e-07	2.5963e-07	2.5844e-07	2.5809e-07	2.569e-07
3.055e-07	3.0052e-07	3.0045e-07	2.9525e-07	2.9133e-07	2.8863e-07	2.8956e-07	2.9055e-07	2.8691e-07	2.8422e-07	2.7863e-07	2.7577e-07	2.7408e-07	2.7205e-07	2.702e-07	2.6851e-07	2.6604e-07	2.6513e-07	2.6589e-07	2.6136e-07	2.5961e-07	2.5804e-07	2.5679e-07	2.595e-07	2.562e-07	2.5094e-07	2.4987e-07	2.4846e-07	2.5211e-07	2.4614e-07	2.4562e-07	2.4437e-07	2.4352e-07	2.4773e-07	2.4326e-07	2.4998e-07	2.5983e-07	2.6789e-07	2.6915e-07	2.6144e-07	2.4588e-07	2.4174e-07	2.3855e-07	2.3808e-07	2.3706e-07	2.357e-07	2.348e-07	2.3322e-07	2.3047e-07	2.2989e-07
4.463e-07	4.4132e-07	4.359e-07	4.3204e-07	4.2896e-07	4.266e-07	4.2502e-07	4.235e-07	4.2042e-07	4.2062e-07	4.1581e-07	4.1245e-07	4.1015e-07	4.0807e-07	4.0649e-07	4.0508e-07	4.0311e-07	4.0142e-07	4.0018e-07	4.0228e-07	3.9791e-07	3.9711e-07	3.9632e-07	3.9646e-07	3.9433e-07	3.9214e-07	3.9039e-07	3.9021e-07	3.8902e-07	3.89e-07	3.8586e-07	3.8557e-07	3.8432e-07	3.8291e-07	3.8184e-07	3.8817e-07	3.8854e-07	3.8596e-07	3.8254e-07	3.7829e-07	3.7537e-07	3.7408e-07	3.7333e-07	3.7214e-07	3.7101e-07	3.7055e-07	3.6958e-07	3.6923e-07	3.6732e-07	3.6685e-07
3.0892e-07	3.0489e-07	3.0025e-07	2.9717e-07	2.9453e-07	2.91e-07	2.9427e-07	2.9593e-07	2.885e-07	2.8486e-07	2.825e-07	2.8053e-07	2.7834e-07	2.7632e-07	2.7719e-07	2.7238e-07	2.7063e-07	2.6889e-07	2.6726e-07	2.6629e-07	2.6761e-07	2.7439e-07	2.8028e-07	2.7162e-07	2.6486e-07	2.6256e-07	2.6132e-07	2.6041e-07	2.5827e-07	2.5625e-07	2.5567e-07	2.5354e-07	2.5335e-07	2.5239e-07	2.502e-07	2.5124e-07	2.5005e-07	2.5421e-07	2.5146e-07	2.4632e-07	2.4607e-07	2.4472e-07	2.4281e-07	2.3984e-07	2.3982e-07	2.3824e-07	2.3922e-07	2.4032e-07	2.3573e-07	2.3477e-07
3.0949e-07	3.0368e-07	2.9926e-07	2.9557e-07	2.9287e-07	2.9208e-07	2.8922e-07	2.9299e-07	2.8879e-07	2.8415e-07	2.8184e-07	2.7993e-07	2.8543e-07	2.96e-07	2.9453e-07	2.8499e-07	2.8825e-07	2.8473e-07	2.7607e-07	2.7488e-07	2.7704e-07	2.8599e-07	2.8759e-07	2.786e-07	2.7e-07	2.6764e-07	2.6673e-07	2.6538e-07	2.6352e-07	2.6178e-07	2.5903e-07	2.594e-07	2.6072e-07	2.5385e-07	2.5166e-07	2.5125e-07	2.5168e-07	2.5478e-07	2.5409e-07	2.4923e-07	2.4815e-07	2.4746e-07	2.465e-07	2.5233e-07	2.4808e-07	2.5436e-07	2.6047e-07	2.6028e-07	2.5029e-07	2.4386e-07
3.1647e-07	3.1099e-07	3.0724e-07	3.0321e-07	3.0024e-07	2.9755e-07	2.958e-07	2.9384e-07	2.9064e-07	2.8901e-07	2.8637e-07	2.8446e-07	2.8282e-07	2.8966e-07	2.9566e-07	2.9102e-07	2.8559e-07	2.8062e-07	2.7603e-07	2.7484e-07	2.7371e-07	2.7837e-07	2.8019e-07	2.7315e-07	2.7024e-07	2.695e-07	2.6736e-07	2.6539e-07	2.6381e-07	2.6385e-07	2.6846e-07	2.6978e-07	2.624e-07	2.5988e-07	2.6164e-07	2.5433e-07	2.5542e-07	2.5864e-07	2.5366e-07	2.5074e-07	2.4989e-07	2.4932e-07	2.4824e-07	2.4761e-07	2.4703e-07	2.6005e-07	2.6861e-07	2.6676e-07	2.5632e-07	2.4672e-07
3.1454e-07	3.0911e-07	3.0453e-07	3.0122e-07	2.9864e-07	2.9589e-07	2.9309e-07	2.9363e-07	2.8893e-07	2.8741e-07	2.8533e-07	2.8364e-07	2.8496e-07	2.8349e-07	2.8548e-07	2.8546e-07	2.8438e-07	2.7902e-07	2.756e-07	2.7185e-07	2.7094e-07	2.6908e-07	2.6778e-07	2.6787e-07	2.6708e-07	2.6505e-07	2.6175e-07	2.605e-07	2.6143e-07	2.691e-07	2.7221e-07	2.6762e-07	2.5947e-07	2.5939e-07	2.5698e-07	2.5462e-07	2.565e-07	2.5787e-07	2.5239e-07	2.5026e-07	2.4935e-07	2.4794e-07	2.468e-07	2.4628e-07	2.5173e-07	2.6012e-07	2.6333e-07	2.6109e-07	2.5043e-07	2.4523e-07
3.1343e-07	3.0746e-07	3.0387e-07	3.004e-07	2.9759e-07	2.9474e-07	2.9199e-07	2.8946e-07	2.8716e-07	2.8525e-07	2.8333e-07	2.8137e-07	2.7979e-07	2.7804e-07	2.763e-07	2.7517e-07	2.7342e-07	2.7262e-07	2.7762e-07	2.8924e-07	2.8716e-07	2.838e-07	2.8078e-07	2.7597e-07	2.7723e-07	2.8017e-07	2.7909e-07	2.7316e-07	2.6858e-07	2.6945e-07	2.6642e-07	2.683e-07	2.7118e-07	2.6921e-07	2.6858e-07	2.6834e-07	2.6793e-07	2.6173e-07	2.5881e-07	2.5824e-07	2.6112e-07	2.5341e-07	2.5289e-07	2.5198e-07	2.5146e-07	2.5222e-07	2.575e-07	2.5575e-07	2.4961e-07	2.4864e-07
3.0999e-07	3.0641e-07	2.9893e-07	2.9261e-07	2.8947e-07	2.8684e-07	2.8431e-07	2.8234e-07	2.8561e-07	2.7891e-07	2.7343e-07	2.7174e-07	2.6972e-07	2.6764e-07	2.6584e-07	2.6454e-07	2.6318e-07	2.6133e-07	2.7134e-07	2.809e-07	2.7475e-07	2.6242e-07	2.643e-07	2.6445e-07	2.5808e-07	2.5951e-07	2.5832e-07	2.5307e-07	2.5177e-07	2.503e-07	2.4878e-07	2.4725e-07	2.4618e-07	2.4488e-07	2.4486e-07	2.4863e-07	2.4728e-07	2.4191e-07	2.4039e-07	2.3842e-07	2.3706e-07	2.3548e-07	2.343e-07	2.3305e-07	2.3175e-07	2.3051e-07	2.3032e-07	2.3047e-07	2.275e-07	2.2659e-07
3.2388e-07	3.1796e-07	3.1287e-07	3.0695e-07	3.0247e-07	2.9961e-07	2.9959e-07	2.9283e-07	2.9137e-07	2.9391e-07	2.8871e-07	2.8318e-07	2.8115e-07	2.8114e-07	2.8034e-07	2.7809e-07	2.7785e-07	2.7393e-07	2.8299e-07	2.8621e-07	2.8435e-07	2.7391e-07	2.7078e-07	2.7137e-07	2.6996e-07	2.6554e-07	2.6318e-07	2.6238e-07	2.6047e-07	2.5856e-07	2.5759e-07	2.5663e-07	2.5616e-07	2.533e-07	2.5223e-07	2.5076e-07	2.4879e-07	2.48e-07	2.4703e-07	2.4684e-07	2.529e-07	2.4904e-07	2.4306e-07	2.4192e-07	2.4096e-07	2.3966e-07	2.3836e-07	2.4347e-07	2.6384e-07	2.4271e-07
3.4401e-07	3.3842e-07	3.3222e-07	3.2429e-07	3.163e-07	3.1327e-07	3.0624e-07	3.0382e-07	3.0213e-07	2.9955e-07	3.0343e-07	3.0826e-07	3.0089e-07	2.9335e-07	2.9205e-07	2.9064e-07	2.894e-07	2.8865e-07	2.8256e-07	2.8578e-07	2.8225e-07	2.7694e-07	2.7631e-07	2.7456e-07	2.722e-07	2.7124e-07	2.6927e-07	2.6814e-07	2.6717e-07	2.6866e-07	2.6479e-07	2.6377e-07	2.6225e-07	2.6123e-07	2.5932e-07	2.5891e-07	2.643e-07	2.5965e-07	2.5724e-07	2.5577e-07	2.5731e-07	2.5317e-07	2.5132e-07	2.5046e-07	2.4928e-07	2.4814e-07	2.4807e-07	2.4632e-07	2.482e-07	2.459e-07
3.5048e-07	3.4428e-07	3.3201e-07	3.2073e-07	3.1787e-07	3.1541e-07	3.1366e-07	3.1086e-07	3.0543e-07	3.0413e-07	3.0166e-07	3.0348e-07	2.9773e-07	2.9409e-07	2.9273e-07	2.8943e-07	2.8824e-07	2.8443e-07	2.8363e-07	2.7977e-07	2.787e-07	2.8091e-07	2.7526e-07	2.7363e-07	2.7249e-07	2.7131e-07	2.7134e-07	2.7227e-07	2.6668e-07	2.6416e-07	2.6425e-07	2.6273e-07	2.6249e-07	2.6113e-07	2.5961e-07	2.5842e-07	2.5723e-07	2.5566e-07	2.5436e-07	2.5334e-07	2.5231e-07	2.5296e-07	2.496e-07	2.4825e-07	2.4695e-07	2.4554e-07	2.4507e-07	2.445e-07	2.4348e-07	2.4223e-07
3.715e-07	3.6474e-07	3.5052e-07	3.4337e-07	3.3939e-07	3.3659e-07	3.3407e-07	3.316e-07	3.3135e-07	3.2621e-07	3.2385e-07	3.2211e-07	3.2014e-07	3.1839e-07	3.1643e-07	3.183e-07	3.2085e-07	3.181e-07	3.134e-07	3.1188e-07	3.0829e-07	3.0672e-07	3.057e-07	3.0401e-07	3.0259e-07	3.0269e-07	3.0813e-07	3.1196e-07	3.0403e-07	3.073e-07	2.9825e-07	2.9723e-07	2.9543e-07	2.9391e-07	2.9272e-07	2.9147e-07	2.9107e-07	2.8771e-07	2.8618e-07	2.8505e-07	2.8598e-07	2.8267e-07	2.816e-07	2.803e-07	2.7928e-07	2.7831e-07	2.7774e-07	2.7789e-07	2.7653e-07	2.7596e-07
[truncated: 120 more rows]
[truncated: 206 more columns]

## Sheet: Extended data Fig.1b
# Channel: Height
# Width: 75.0 µm
# Height: 40.0 µm
# Value units: m
[truncated: 1,036 more rows]
[truncated: 206 more columns]
